# Supplementary material for: Aging Induces Profound Changes in sncRNA in Rat Sperm and these Changes are Modified by Perinatal Exposure to Environmental Flame Retardant
Source: Preprints.org preprint supplement (doi:10.20944/preprints202010.0339.v1), 2020-10-16
Supplement: Supplementary file 1 [file supplementary]

## Sheet: pir_vst
Supplemental Table 1: Expression of sncRNA in rat sperm samples. Legend: C65 - control samples on PND65; E65 - BDE-47 exposed samples on PND65; C120 - control samples on PND120; E120 - BDE-47 exposed samples on PND120. Lines 3-40186 - piRNA; lines 40187-40630 -tRNA; lines 40631-41668 - miRNA and precursor miRNA.
sncRNA ID	C120-11	C120-12	C120-13	C120-14	C120-8	C120-9	C65-11	C65-12	C65-13	C65-14	C65-8	C65-9	E120-1	E120-2	E120-3	E120-4	E120-5	E120-6	E65-1	E65-2	E65-3	E65-4	E65-5	E65-6
rno-piR-1	-2.8091	0.0587823	0.675187	2.03484	2.53155	2.0914	5.53891	2.05668	-2.8091	0.960112	2.86126	-2.8091	-2.8091	-0.203124	-2.8091	-2.8091	0.493989	-2.8091	2.82654	4.98096	-2.8091	1.42735	-2.8091	-2.8091
rno-piR-1000	-2.8091	-2.8091	-1.62376	-0.153685	-2.8091	-2.8091	-2.8091	-2.8091	-2.8091	-2.8091	-2.8091	-2.8091	-2.8091	-2.8091	-2.8091	-2.8091	-2.8091	-2.8091	-2.8091	-2.8091	-2.8091	-2.8091	-2.8091	-2.8091
rno-piR-10000	-2.8091	-2.8091	-1.37586	-2.8091	-2.8091	-2.8091	-2.8091	-2.8091	-2.8091	-2.8091	-2.8091	-2.8091	-2.8091	-2.8091	-2.8091	-2.8091	-2.8091	-2.8091	-2.8091	-2.8091	-2.8091	-2.8091	-2.8091	-2.8091
rno-piR-10001	-2.8091	-1.21021	-2.8091	-2.8091	-2.8091	-2.8091	3.72484	-2.8091	-2.8091	-2.8091	-2.8091	-2.8091	-2.8091	-2.8091	-2.8091	-2.8091	-2.8091	-2.8091	-2.8091	-2.8091	-2.8091	0.563112	-2.8091	-2.8091
rno-piR-10002	-0.497571	-1.21021	-0.483425	-2.8091	1.07661	-2.8091	-2.8091	1.51844	-2.8091	-2.8091	-2.8091	-2.8091	-2.8091	-0.203124	-2.8091	-2.8091	-2.8091	-2.8091	2.02303	2.52915	-2.8091	1.96264	-2.8091	-2.8091
rno-piR-10003	-2.8091	-2.8091	-1.62376	-2.8091	-2.8091	-2.8091	-2.8091	-2.8091	-2.8091	-2.8091	-2.8091	-2.8091	-2.8091	-2.8091	-2.8091	-2.8091	-2.8091	-2.8091	-2.8091	-2.8091	-2.8091	-2.8091	-2.8091	-2.8091
rno-piR-10005	-2.8091	-1.21021	-1.00219	-2.8091	-0.691621	-2.8091	-2.8091	-2.8091	-2.8091	-2.8091	-2.8091	-2.8091	-2.8091	-2.8091	-2.8091	-2.8091	-0.269622	-2.8091	-2.8091	-2.8091	-2.8091	-2.8091	-2.8091	-2.8091
rno-piR-10006	-2.8091	-2.8091	-1.62376	-2.8091	-2.8091	-0.403412	-2.8091	-2.8091	-2.8091	-2.8091	-2.8091	-2.8091	-2.8091	-2.8091	-2.8091	-2.8091	-2.8091	-2.8091	-2.8091	-2.8091	-2.8091	-2.8091	-2.8091	-2.8091
rno-piR-10007	-2.8091	-2.8091	-1.9595	-2.8091	-2.8091	-2.8091	-2.8091	-2.8091	-2.8091	-2.8091	-2.8091	-2.8091	-2.8091	-2.8091	-2.8091	-2.8091	-2.8091	-2.8091	-2.8091	-2.8091	-2.8091	-2.8091	-2.8091	-2.8091
rno-piR-10009	-2.8091	-2.8091	-2.8091	-2.8091	-2.8091	-2.8091	-2.8091	-2.8091	-2.8091	-2.8091	-2.8091	-2.8091	-2.8091	-2.8091	-2.8091	-2.8091	-2.8091	-2.8091	-2.8091	0.45269	-2.8091	-2.8091	-2.8091	-2.8091
rno-piR-1001	-2.8091	-1.21021	-1.9595	-2.8091	-2.8091	-2.8091	-2.8091	-2.8091	-2.8091	-2.8091	-2.8091	-2.8091	-2.8091	-0.857667	-2.8091	-2.8091	-2.8091	-2.8091	-2.8091	-2.8091	-2.8091	-2.8091	-2.8091	-2.8091
rno-piR-10010	-2.8091	-2.8091	-2.8091	-2.8091	-2.8091	-2.8091	-2.8091	-2.8091	-2.8091	-2.8091	-2.8091	-2.8091	-2.8091	-2.8091	-2.8091	-2.8091	-0.912094	-2.8091	-2.8091	-2.8091	-2.8091	-2.8091	2.82617	-2.8091
rno-piR-10012	-2.8091	-1.21021	-1.00219	-2.8091	-2.8091	-2.8091	-2.8091	-2.8091	-2.8091	-2.8091	-2.8091	-2.8091	-2.8091	-2.8091	-2.8091	-2.8091	-0.912094	-2.8091	-2.8091	-2.8091	-2.8091	-2.8091	-2.8091	-2.8091
rno-piR-10014	-2.8091	-2.8091	-1.62376	-0.817012	-2.8091	-2.8091	-2.8091	-2.8091	-2.8091	-2.8091	-2.8091	-2.8091	-2.8091	-2.8091	-2.8091	-2.8091	-2.8091	-2.8091	0.0317522	-2.8091	-2.8091	-2.8091	-2.8091	-2.8091
rno-piR-10016	-2.8091	-2.8091	-1.9595	-2.8091	-2.8091	-2.8091	-2.8091	-2.8091	-2.8091	-2.8091	-2.8091	-2.8091	-2.8091	-2.8091	-2.8091	-2.8091	-2.8091	-2.8091	-2.8091	-2.8091	-2.8091	-2.8091	-2.8091	-2.8091
rno-piR-10017	-2.8091	-2.8091	-2.8091	-2.8091	-2.8091	-2.8091	-2.8091	-2.8091	-2.8091	-0.291042	-2.8091	-2.8091	-2.8091	-2.8091	-2.8091	-2.8091	-2.8091	-2.8091	-2.8091	-2.8091	-2.8091	-2.8091	-2.8091	-2.8091
rno-piR-10018	-2.8091	-1.21021	-1.62376	-2.8091	-0.691621	-2.8091	-2.8091	-2.8091	-2.8091	-0.291042	-2.8091	-2.8091	-2.8091	-2.8091	-2.8091	-2.8091	-0.912094	-2.8091	-2.8091	-2.8091	-2.8091	-2.8091	-2.8091	-2.8091
rno-piR-10019	-2.8091	-2.8091	-2.8091	-2.8091	-2.8091	-0.403412	-2.8091	-2.8091	2.2881	-2.8091	1.9153	-2.8091	-2.8091	-2.8091	-2.8091	-2.8091	-2.8091	-2.8091	-2.8091	-2.8091	-2.8091	-2.8091	-2.8091	-2.8091
rno-piR-1002	1.57947	-2.8091	-0.851482	-2.8091	-2.8091	-2.8091	-2.8091	-2.8091	-2.8091	-2.8091	-2.8091	-2.8091	-2.8091	-2.8091	-2.8091	-2.8091	-2.8091	-2.8091	-2.8091	-2.8091	-2.8091	-2.8091	-2.8091	-2.8091
rno-piR-10020	-2.8091	-0.640445	-1.17414	-2.8091	-0.00243066	-2.8091	-2.8091	-2.8091	-2.8091	-2.8091	-2.8091	-2.8091	-2.8091	-0.203124	-2.8091	-2.8091	-2.8091	-2.8091	-2.8091	-2.8091	-2.8091	-2.8091	-2.8091	-2.8091
rno-piR-10021	0.702996	-1.21021	-0.195589	-2.8091	-2.8091	0.338593	-2.8091	3.22282	-2.8091	-2.8091	-2.8091	2.03091	-2.8091	-0.857667	-2.8091	-2.8091	-0.269622	-0.401497	-2.8091	2.89147	-2.8091	2.35186	-2.8091	-2.8091
rno-piR-10022	0.228153	-2.8091	-1.37586	-2.8091	-0.00243066	-0.403412	-2.8091	-2.8091	-2.8091	-2.8091	3.6445	2.03091	-2.8091	-2.8091	-2.8091	-2.8091	-2.8091	-2.8091	0.0317522	-2.8091	-2.8091	-2.8091	5.23789	-2.8091
rno-piR-10023	1.05817	-2.8091	-1.62376	-2.8091	-2.8091	-2.8091	-2.8091	-2.8091	-2.8091	0.469226	-2.8091	-2.8091	-2.8091	-2.8091	-2.8091	-2.8091	-2.8091	-2.8091	-2.8091	3.09063	-2.8091	-2.8091	-2.8091	-2.8091
rno-piR-10024	-0.497571	-0.246323	0.476328	1.79104	0.454729	-2.8091	3.50757	-2.8091	-2.8091	-2.8091	-2.8091	-2.8091	-2.8091	1.58924	5.98831	-2.8091	0.163835	0.340829	1.34924	-2.8091	-2.8091	-2.8091	-2.8091	-2.8091
rno-piR-10025	-2.8091	-1.21021	-0.195589	0.627278	-0.691621	1.18072	-2.8091	-2.8091	-2.8091	0.469226	-2.8091	-2.8091	-2.8091	1.43551	-2.8091	-2.8091	0.163835	0.340829	-2.8091	-2.8091	-2.8091	-2.8091	-2.8091	-2.8091
rno-piR-10027	-0.497571	-2.8091	-1.17414	-0.817012	-0.00243066	-0.403412	-2.8091	-2.8091	-2.8091	0.469226	-2.8091	-2.8091	-2.8091	-2.8091	-2.8091	0.370133	-2.8091	-0.401497	0.0317522	-0.305325	-2.8091	2.65797	-2.8091	-2.8091
rno-piR-10029	1.34239	2.05634	2.08853	4.12618	1.30869	1.18072	3.91363	0.646749	-2.8091	3.98877	1.01527	2.98098	-2.8091	1.85471	-2.8091	-2.8091	2.18467	0.823464	2.26962	5.78633	10.4541	4.86915	-2.8091	-2.8091
rno-piR-1003	-2.8091	-2.8091	-2.8091	-2.8091	-0.691621	-2.8091	2.54268	0.646749	-2.8091	-0.291042	-2.8091	-2.8091	-2.8091	-2.8091	-2.8091	-2.8091	-2.8091	-2.8091	-2.8091	-2.8091	-2.8091	2.35186	-2.8091	-2.8091
rno-piR-10030	-0.497571	-2.8091	-1.37586	-2.8091	-2.8091	-2.8091	-2.8091	-2.8091	-2.8091	0.469226	-2.8091	-2.8091	-2.8091	-2.8091	-2.8091	-2.8091	-2.8091	-2.8091	-2.8091	-2.8091	-2.8091	-2.8091	-2.8091	-2.8091
rno-piR-10031	-2.8091	-1.21021	0.112934	-2.8091	-2.8091	-0.403412	-2.8091	-2.8091	-2.8091	-2.8091	-2.8091	-2.8091	-2.8091	-2.8091	-2.8091	-2.8091	-0.912094	-2.8091	-2.8091	-2.8091	-2.8091	-2.8091	-2.8091	-2.8091
rno-piR-10032	-2.8091	-2.8091	-1.9595	-2.8091	-0.691621	-2.8091	-2.8091	-2.8091	-2.8091	-2.8091	-2.8091	-2.8091	-2.8091	-2.8091	-2.8091	-2.8091	-2.8091	-2.8091	-2.8091	-2.8091	-2.8091	-2.8091	-2.8091	-2.8091
rno-piR-10033	-2.8091	-2.8091	-2.8091	-2.8091	-2.8091	-2.8091	-2.8091	-2.8091	-2.8091	0.960112	-2.8091	-2.8091	-2.8091	-2.8091	-2.8091	-2.8091	-0.912094	-2.8091	-2.8091	-2.8091	-2.8091	-2.8091	-2.8091	-2.8091
rno-piR-10034	-0.497571	-2.8091	-2.8091	-2.8091	-2.8091	-2.8091	-2.8091	-2.8091	-2.8091	-2.8091	-2.8091	-2.8091	-2.8091	-2.8091	-2.8091	-2.8091	-2.8091	-2.8091	-2.8091	-2.8091	-2.8091	-2.8091	-2.8091	-2.8091
rno-piR-10035	-2.8091	-2.8091	-1.9595	-2.8091	-2.8091	-2.8091	-2.8091	-2.8091	-2.8091	-2.8091	-2.8091	-2.8091	-2.8091	-2.8091	-2.8091	-2.8091	-2.8091	-2.8091	-2.8091	-2.8091	-2.8091	-2.8091	-2.8091	-2.8091
rno-piR-10036	-2.8091	-2.8091	-0.851482	-2.8091	-2.8091	-2.8091	-2.8091	-2.8091	-2.8091	-2.8091	-2.8091	-2.8091	-2.8091	-2.8091	-2.8091	-2.8091	-2.8091	-2.8091	-2.8091	-2.8091	-2.8091	-2.8091	-2.8091	-2.8091
rno-piR-10038	-2.8091	-2.8091	-1.9595	-2.8091	-2.8091	-2.8091	-2.8091	-2.8091	-2.8091	-0.291042	-2.8091	-2.8091	-2.8091	-2.8091	-2.8091	-2.8091	-2.8091	-0.401497	-2.8091	-2.8091	-2.8091	-2.8091	-2.8091	-2.8091
rno-piR-10039	-0.497571	-1.21021	0.180423	-2.8091	-0.00243066	-0.403412	-2.8091	0.646749	-2.8091	-2.8091	-2.8091	-2.8091	-2.8091	-0.203124	-2.8091	-2.8091	-0.912094	-0.401497	-2.8091	-2.8091	-2.8091	0.563112	-2.8091	-2.8091
rno-piR-1004	-2.8091	-2.8091	-1.9595	-2.8091	-2.8091	-2.8091	-2.8091	-2.8091	-2.8091	-2.8091	-2.8091	-2.8091	-2.8091	-2.8091	-2.8091	-2.8091	-2.8091	-2.8091	-2.8091	-2.8091	-2.8091	-2.8091	-2.8091	1.83995
rno-piR-10040	-2.8091	-0.246323	1.3324	1.9181	-0.691621	0.821078	-2.8091	-2.8091	2.2881	2.54854	-2.8091	-2.8091	-2.8091	-0.203124	-2.8091	-2.8091	0.7614	-0.401497	-2.8091	3.34571	-2.8091	2.65797	-2.8091	-2.8091
rno-piR-10042	-0.497571	-2.8091	-1.9595	-2.8091	-2.8091	-2.8091	-2.8091	-2.8091	-2.8091	0.469226	-2.8091	-2.8091	-2.8091	-2.8091	-2.8091	-2.8091	-2.8091	-2.8091	0.0317522	-2.8091	-2.8091	-2.8091	-2.8091	-2.8091
rno-piR-10043	-2.8091	-2.8091	-1.37586	-2.8091	-2.8091	-2.8091	-2.8091	-2.8091	-2.8091	0.960112	-2.8091	-2.8091	-2.8091	-2.8091	-2.8091	-2.8091	-2.8091	-0.401497	0.0317522	-2.8091	-2.8091	-2.8091	-2.8091	-2.8091
rno-piR-10044	-2.8091	-2.8091	-1.62376	-0.817012	-2.8091	-2.8091	-2.8091	-2.8091	-2.8091	-2.8091	-2.8091	-2.8091	-2.8091	-2.8091	-2.8091	-2.8091	-2.8091	-2.8091	-2.8091	-2.8091	-2.8091	-2.8091	-2.8091	-2.8091
rno-piR-10045	-0.497571	-1.21021	-1.62376	-2.8091	-2.8091	-2.8091	3.72484	3.41002	-2.8091	-2.8091	-2.8091	4.94179	-2.8091	-2.8091	-2.8091	-2.8091	-2.8091	-2.8091	-2.8091	-2.8091	-2.8091	-2.8091	-2.8091	-2.8091
rno-piR-10047	-2.8091	-2.8091	-1.9595	-2.8091	-2.8091	-2.8091	-2.8091	-2.8091	-2.8091	-2.8091	-2.8091	-2.8091	-2.8091	-2.8091	-2.8091	-2.8091	-0.269622	-2.8091	-2.8091	-2.8091	-2.8091	-2.8091	-2.8091	-2.8091
rno-piR-10048	-2.8091	-2.8091	-1.17414	-2.8091	-2.8091	-2.8091	-2.8091	-2.8091	-2.8091	-2.8091	-2.8091	-2.8091	-2.8091	-0.857667	-2.8091	-2.8091	-2.8091	-2.8091	-2.8091	-2.8091	-2.8091	-2.8091	-2.8091	-2.8091
rno-piR-10049	1.05817	-2.8091	-1.62376	-2.8091	0.79938	0.821078	-2.8091	-2.8091	-2.8091	1.32461	-2.8091	-2.8091	-2.8091	0.236575	-2.8091	4.85423	-0.912094	-0.401497	0.0317522	-2.8091	-2.8091	-2.8091	2.82617	-2.8091
rno-piR-10050	-2.8091	-1.21021	-2.8091	-2.8091	-2.8091	-2.8091	-2.8091	-2.8091	-2.8091	-2.8091	-2.8091	-2.8091	-2.8091	-0.857667	-2.8091	-2.8091	-2.8091	-2.8091	-2.8091	-2.8091	-2.8091	-2.8091	-2.8091	-2.8091
rno-piR-10051	-2.8091	-1.21021	-1.37586	-2.8091	-2.8091	-2.8091	-2.8091	-2.8091	-2.8091	-2.8091	-2.8091	-2.8091	-2.8091	-2.8091	-2.8091	-2.8091	-2.8091	-2.8091	-2.8091	-2.8091	-2.8091	-2.8091	-2.8091	-2.8091
rno-piR-10052	-2.8091	-2.8091	-0.195589	-0.817012	-2.8091	-2.8091	-2.8091	2.75461	-2.8091	-2.8091	-2.8091	-2.8091	-2.8091	-0.203124	-2.8091	-2.8091	-2.8091	-2.8091	-2.8091	-2.8091	-2.8091	-2.8091	-2.8091	-2.8091
rno-piR-10053	-2.8091	-2.8091	-2.8091	-2.8091	-2.8091	-0.403412	-2.8091	-2.8091	-2.8091	0.469226	-2.8091	-2.8091	-2.8091	-2.8091	-2.8091	-2.8091	-2.8091	-0.401497	-2.8091	-2.8091	-2.8091	-2.8091	-2.8091	-2.8091
rno-piR-10054	0.702996	-2.8091	0.528722	0.290504	-0.691621	-0.403412	5.21918	-2.8091	-2.8091	-2.8091	-2.8091	-2.8091	-2.8091	-0.857667	-2.8091	-2.8091	0.7614	-2.8091	0.0317522	3.96878	-2.8091	-2.8091	-2.8091	-2.8091
rno-piR-10055	-2.8091	-2.8091	-2.8091	-2.8091	-2.8091	-2.8091	-2.8091	-2.8091	-2.8091	-2.8091	-2.8091	-2.8091	-2.8091	-2.8091	-2.8091	-2.8091	-0.912094	-2.8091	-2.8091	-2.8091	-2.8091	-2.8091	-2.8091	-2.8091
rno-piR-10056	3.74226	0.520875	2.50599	3.66565	2.6203	3.72488	5.41938	5.23992	5.38236	5.39399	3.83307	5.11023	7.16999	2.44331	-2.8091	3.96596	1.50456	2.39711	3.79767	7.52955	-2.8091	6.87349	4.78252	6.21998
rno-piR-10057	0.228153	-2.8091	-1.37586	-2.8091	-2.8091	-2.8091	-2.8091	-2.8091	-2.8091	-2.8091	-2.8091	-2.8091	-2.8091	-2.8091	-2.8091	-2.8091	-2.8091	-2.8091	-2.8091	-2.8091	-2.8091	-2.8091	-2.8091	-2.8091
rno-piR-10059	-2.8091	-2.8091	-2.8091	-2.8091	-2.8091	-2.8091	-2.8091	-2.8091	-2.8091	-2.8091	-2.8091	-2.8091	-2.8091	-2.8091	-2.8091	-2.8091	-2.8091	-2.8091	0.0317522	-2.8091	-2.8091	-2.8091	-2.8091	-2.8091
rno-piR-10060	-0.497571	-2.8091	-0.716865	-0.817012	-2.8091	0.821078	-2.8091	-2.8091	-2.8091	0.469226	-2.8091	-2.8091	-2.8091	0.236575	-2.8091	-2.8091	-2.8091	-0.401497	1.72527	3.96878	-2.8091	-2.8091	-2.8091	-2.8091
rno-piR-10061	-2.8091	-2.8091	-2.8091	-2.8091	-2.8091	-2.8091	-2.8091	-2.8091	-2.8091	-2.8091	-2.8091	-2.8091	-2.8091	-2.8091	-2.8091	-2.8091	-2.8091	-0.401497	-2.8091	-2.8091	-2.8091	-2.8091	-2.8091	-2.8091
rno-piR-10063	-2.8091	-2.8091	-1.9595	-0.817012	-0.00243066	-2.8091	-2.8091	-2.8091	-2.8091	-2.8091	-2.8091	-2.8091	-2.8091	-2.8091	-2.8091	0.370133	-2.8091	-2.8091	-2.8091	-2.8091	-2.8091	-2.8091	-2.8091	-2.8091
rno-piR-10064	-2.8091	-2.8091	-2.8091	-2.8091	-2.8091	-2.8091	-2.8091	-2.8091	-2.8091	-2.8091	2.46457	-2.8091	-2.8091	-2.8091	-2.8091	-2.8091	-2.8091	-2.8091	-2.8091	-2.8091	-2.8091	-2.8091	-2.8091	-2.8091
rno-piR-10065	-2.8091	-1.21021	-1.37586	-0.817012	-2.8091	0.821078	-2.8091	-2.8091	-2.8091	-2.8091	-2.8091	-2.8091	-2.8091	-0.857667	-2.8091	-2.8091	-2.8091	-2.8091	0.0317522	1.83752	-2.8091	-2.8091	-2.8091	-2.8091
rno-piR-10066	-2.8091	-2.8091	-1.9595	-2.8091	-2.8091	-2.8091	-2.8091	-2.8091	-2.8091	-2.8091	-2.8091	-2.8091	-2.8091	-2.8091	-2.8091	-2.8091	-0.912094	-2.8091	-2.8091	-2.8091	-2.8091	-2.8091	-2.8091	-2.8091
rno-piR-10067	-2.8091	-1.21021	-2.8091	-2.8091	-2.8091	-0.403412	-2.8091	-2.8091	-2.8091	0.469226	-2.8091	-2.8091	-2.8091	-2.8091	-2.8091	-2.8091	-2.8091	-2.8091	-2.8091	2.66031	-2.8091	0.563112	-2.8091	-2.8091
rno-piR-1007	-2.8091	-2.8091	-1.62376	-2.8091	-2.8091	-2.8091	-2.8091	-2.8091	-2.8091	-2.8091	-2.8091	-2.8091	-2.8091	-0.857667	-2.8091	-2.8091	-2.8091	-2.8091	-2.8091	-2.8091	-2.8091	-2.8091	-2.8091	-2.8091
rno-piR-10070	-2.8091	-2.8091	-0.380507	0.290504	-2.8091	-2.8091	-2.8091	-2.8091	-2.8091	-2.8091	-2.8091	-2.8091	-2.8091	-2.8091	-2.8091	-2.8091	0.163835	-2.8091	-2.8091	-2.8091	-2.8091	-2.8091	-2.8091	-2.8091
rno-piR-10071	-2.8091	-2.8091	-0.483425	-2.8091	-2.8091	0.338593	1.99161	-2.8091	3.24626	2.24363	-2.8091	2.03091	-2.8091	-2.8091	-2.8091	-2.8091	-0.912094	0.340829	-2.8091	-2.8091	-2.8091	0.563112	-2.8091	-2.8091
rno-piR-10073	-2.8091	-2.8091	-1.9595	-2.8091	-2.8091	-2.8091	-2.8091	-2.8091	-2.8091	-2.8091	-2.8091	-2.8091	-2.8091	-2.8091	-2.8091	-2.8091	-2.8091	-2.8091	-2.8091	-2.8091	-2.8091	-2.8091	-2.8091	-2.8091
rno-piR-10074	1.05817	2.97204	-0.483425	4.94597	2.43696	1.91202	3.50757	-2.8091	-2.8091	-2.8091	-2.8091	-2.8091	-2.8091	2.66665	-2.8091	5.21364	1.99163	2.09402	0.838007	4.87697	4.15506	5.08954	-2.8091	-2.8091
rno-piR-10075	-2.8091	-2.8091	-2.8091	-2.8091	-2.8091	-2.8091	-2.8091	-2.8091	-2.8091	-2.8091	-2.8091	-2.8091	-2.8091	-2.8091	-2.8091	-2.8091	-2.8091	-0.401497	-2.8091	-2.8091	-2.8091	-2.8091	-2.8091	-2.8091
rno-piR-10076	-2.8091	-2.8091	-2.8091	-2.8091	-2.8091	-2.8091	-2.8091	-2.8091	-2.8091	-2.8091	-2.8091	-2.8091	-2.8091	-0.857667	-2.8091	-2.8091	-2.8091	-2.8091	-2.8091	-2.8091	-2.8091	-2.8091	-2.8091	-2.8091
rno-piR-10077	-2.8091	-2.8091	-2.8091	-2.8091	-2.8091	-2.8091	-2.8091	-2.8091	-2.8091	-2.8091	-2.8091	-2.8091	-2.8091	-2.8091	-2.8091	-2.8091	-2.8091	-2.8091	-2.8091	-2.8091	-2.8091	1.42735	-2.8091	-2.8091
rno-piR-10079	2.1196	0.308753	1.54932	1.79104	1.68365	1.18072	3.25166	4.29891	2.2881	4.56513	4.28467	-2.8091	-2.8091	-0.203124	5.40658	1.21556	-0.269622	2.09402	1.34924	6.16312	-2.8091	5.44943	5.47722	-2.8091
rno-piR-1008	-2.8091	-1.21021	-1.17414	-2.8091	-0.691621	-2.8091	1.08683	-2.8091	-2.8091	0.469226	-2.8091	-2.8091	-2.8091	-0.857667	-2.8091	-2.8091	-0.912094	-2.8091	0.0317522	-2.8091	-2.8091	-2.8091	-2.8091	-2.8091
rno-piR-10080	-2.8091	-2.8091	-2.8091	-2.8091	-2.8091	-2.8091	-2.8091	-2.8091	-2.8091	1.32461	-2.8091	-2.8091	-2.8091	-2.8091	-2.8091	-2.8091	-2.8091	-2.8091	-2.8091	-2.8091	-2.8091	-2.8091	-2.8091	-2.8091
rno-piR-10081	1.34239	-2.8091	-0.716865	-2.8091	-2.8091	-2.8091	-2.8091	-2.8091	-2.8091	-2.8091	-2.8091	-2.8091	-2.8091	-2.8091	-2.8091	-2.8091	-0.269622	-0.401497	-2.8091	-0.305325	-2.8091	-2.8091	-2.8091	-2.8091
rno-piR-10082	-2.8091	-2.8091	-1.37586	-2.8091	-2.8091	-2.8091	1.08683	0.646749	-2.8091	-0.291042	1.01527	-2.8091	-2.8091	-2.8091	-2.8091	-2.8091	-2.8091	-0.401497	-2.8091	-2.8091	-2.8091	-2.8091	-2.8091	-2.8091
rno-piR-10084	-2.8091	-1.21021	-1.37586	-2.8091	-2.8091	-2.8091	-2.8091	-2.8091	-2.8091	-2.8091	3.42752	-2.8091	-2.8091	-0.857667	-2.8091	-2.8091	-2.8091	-2.8091	1.34924	0.45269	-2.8091	-2.8091	-2.8091	-2.8091
rno-piR-10085	-2.8091	-2.8091	-2.8091	-2.8091	-2.8091	-2.8091	-2.8091	-2.8091	-2.8091	-2.8091	-2.8091	-2.8091	-2.8091	-2.8091	-2.8091	2.68242	-2.8091	-2.8091	-2.8091	-2.8091	-2.8091	-2.8091	-2.8091	-2.8091
rno-piR-10086	-2.8091	-1.21021	-1.62376	-2.8091	-2.8091	-2.8091	-2.8091	-2.8091	-2.8091	-2.8091	-2.8091	-2.8091	-2.8091	-2.8091	-2.8091	-2.8091	-2.8091	-2.8091	-2.8091	-2.8091	-2.8091	-2.8091	-2.8091	-2.8091
rno-piR-10087	-2.8091	-1.21021	-2.8091	-2.8091	-2.8091	-2.8091	-2.8091	-2.8091	-2.8091	-2.8091	-2.8091	-2.8091	-2.8091	-0.857667	-2.8091	-2.8091	-2.8091	-2.8091	-2.8091	-2.8091	-2.8091	-2.8091	-2.8091	-2.8091
rno-piR-10088	-2.8091	-2.8091	-0.716865	-2.8091	-0.691621	-2.8091	-2.8091	-2.8091	-2.8091	-2.8091	-2.8091	-2.8091	-2.8091	-0.203124	-2.8091	-2.8091	0.163835	-2.8091	-2.8091	-2.8091	-2.8091	-2.8091	-2.8091	-2.8091
rno-piR-10089	0.702996	-2.8091	0.36532	-0.817012	-0.691621	0.338593	-2.8091	-2.8091	-2.8091	-2.8091	-2.8091	-2.8091	-2.8091	-0.203124	-2.8091	-2.8091	-0.912094	-2.8091	-2.8091	-2.8091	-2.8091	-2.8091	-2.8091	-2.8091
rno-piR-1009	-2.8091	-2.8091	-2.8091	-2.8091	-2.8091	-2.8091	-2.8091	-2.8091	-2.8091	0.469226	-2.8091	-2.8091	-2.8091	-2.8091	-2.8091	-2.8091	-2.8091	-2.8091	-2.8091	-2.8091	-2.8091	-2.8091	-2.8091	-2.8091
rno-piR-10090	-2.8091	-0.640445	0.84958	0.899196	1.07661	1.46788	-2.8091	0.646749	-2.8091	1.32461	-2.8091	-2.8091	-2.8091	-0.203124	-2.8091	-2.8091	0.7614	1.47041	2.26962	-2.8091	-2.8091	-2.8091	-2.8091	-2.8091
rno-piR-10093	0.228153	-2.8091	-1.62376	-2.8091	-0.691621	2.0914	-2.8091	-2.8091	-2.8091	-0.291042	-2.8091	-2.8091	-2.8091	-0.857667	-2.8091	4.14345	-2.8091	-0.401497	0.838007	-2.8091	-2.8091	-2.8091	-2.8091	-2.8091
rno-piR-10094	-2.8091	-1.21021	-1.62376	-2.8091	-0.00243066	-0.403412	-2.8091	-2.8091	-2.8091	-2.8091	-2.8091	-2.8091	-2.8091	-2.8091	-2.8091	-2.8091	-2.8091	-0.401497	0.0317522	-2.8091	-2.8091	-2.8091	-2.8091	-2.8091
rno-piR-10095	-2.8091	-2.8091	-2.8091	-2.8091	-2.8091	-2.8091	-2.8091	-2.8091	-2.8091	-2.8091	-2.8091	-2.8091	-2.8091	-2.8091	-2.8091	-2.8091	-0.912094	-2.8091	-2.8091	-2.8091	-2.8091	-2.8091	-2.8091	-2.8091
rno-piR-10096	-2.8091	-2.8091	-1.37586	-2.8091	-2.8091	-2.8091	1.08683	-2.8091	-2.8091	0.469226	3.42752	-2.8091	-2.8091	-2.8091	-2.8091	-2.8091	-0.912094	-0.401497	-2.8091	-2.8091	-2.8091	-2.8091	-2.8091	-2.8091
rno-piR-10097	-2.8091	-1.21021	-2.8091	-2.8091	-2.8091	-2.8091	-2.8091	-2.8091	-2.8091	-2.8091	-2.8091	-2.8091	-2.8091	-2.8091	-2.8091	-2.8091	-2.8091	-2.8091	-2.8091	-2.8091	-2.8091	-2.8091	-2.8091	-2.8091
rno-piR-10099	-2.8091	-1.21021	-1.37586	-2.8091	-2.8091	-2.8091	-2.8091	-2.8091	-2.8091	-0.291042	-2.8091	-2.8091	-2.8091	-2.8091	-2.8091	-2.8091	-2.8091	-2.8091	-2.8091	-2.8091	-2.8091	-2.8091	-2.8091	-2.8091
rno-piR-101	0.228153	-2.8091	-1.62376	-2.8091	-2.8091	-2.8091	-2.8091	-2.8091	-2.8091	-2.8091	2.86126	-2.8091	-2.8091	-2.8091	-2.8091	-2.8091	-2.8091	-2.8091	-2.8091	-2.8091	-2.8091	-2.8091	-2.8091	-2.8091
rno-piR-1010	0.702996	-0.246323	-0.284903	-2.8091	-0.00243066	-2.8091	-2.8091	-2.8091	-2.8091	0.469226	-2.8091	-2.8091	-2.8091	-2.8091	-2.8091	-2.8091	-0.912094	0.340829	-2.8091	-2.8091	-2.8091	-2.8091	-2.8091	-2.8091
rno-piR-10101	-2.8091	-1.21021	0.0420094	-2.8091	1.30869	-0.403412	1.99161	-2.8091	-2.8091	-0.291042	-2.8091	-2.8091	-2.8091	0.570591	-2.8091	-2.8091	-0.269622	-0.401497	-2.8091	-2.8091	-2.8091	-2.8091	-2.8091	-2.8091
rno-piR-10103	0.228153	-2.8091	-0.111754	-0.817012	-2.8091	-2.8091	1.99161	-2.8091	-2.8091	-2.8091	-2.8091	-2.8091	-2.8091	-2.8091	-2.8091	-2.8091	0.163835	-2.8091	0.0317522	-2.8091	-2.8091	2.91032	1.88149	-2.8091
rno-piR-10104	0.228153	-0.640445	-0.594968	-0.817012	-0.00243066	-0.403412	3.25166	-2.8091	-2.8091	1.61494	-2.8091	-2.8091	-2.8091	-2.8091	-2.8091	-2.8091	-2.8091	-2.8091	0.0317522	-2.8091	-2.8091	-2.8091	-2.8091	-2.8091
rno-piR-10105	-2.8091	-2.8091	-1.62376	-0.817012	-2.8091	-2.8091	-2.8091	-2.8091	-2.8091	-2.8091	-2.8091	-2.8091	-2.8091	-2.8091	-2.8091	-2.8091	-2.8091	-2.8091	0.0317522	-2.8091	-2.8091	-2.8091	-2.8091	-2.8091
rno-piR-10106	-2.8091	-2.8091	-2.8091	-2.8091	-2.8091	-2.8091	1.99161	-2.8091	-2.8091	-2.8091	-2.8091	-2.8091	-2.8091	-2.8091	-2.8091	-2.8091	-2.8091	-2.8091	-2.8091	-2.8091	-2.8091	-2.8091	-2.8091	-2.8091
rno-piR-10107	-2.8091	-2.8091	-1.62376	-2.8091	-2.8091	-2.8091	-2.8091	-2.8091	-2.8091	-2.8091	-2.8091	-2.8091	-2.8091	-0.857667	-2.8091	-2.8091	-2.8091	-2.8091	-2.8091	-2.8091	-2.8091	-2.8091	-2.8091	-2.8091
rno-piR-10108	-0.497571	-1.21021	-0.195589	-2.8091	-2.8091	-0.403412	1.99161	-2.8091	-2.8091	0.469226	-2.8091	-2.8091	-2.8091	-2.8091	-2.8091	-2.8091	0.163835	-2.8091	0.0317522	2.04396	-2.8091	-2.8091	-2.8091	-2.8091
rno-piR-10109	-2.8091	-1.21021	-1.00219	-2.8091	-2.8091	-2.8091	-2.8091	-2.8091	-2.8091	0.960112	-2.8091	-2.8091	-2.8091	-2.8091	-2.8091	-2.8091	-2.8091	-2.8091	-2.8091	-2.8091	-2.8091	-2.8091	-2.8091	-2.8091
rno-piR-1011	-2.8091	-2.8091	-1.9595	-2.8091	-2.8091	-0.403412	-2.8091	-2.8091	-2.8091	-2.8091	-2.8091	-2.8091	-2.8091	-2.8091	-2.8091	-2.8091	-0.269622	-2.8091	-2.8091	-2.8091	-2.8091	-2.8091	-2.8091	-2.8091
rno-piR-10110	-2.8091	-2.8091	-0.851482	-2.8091	-2.8091	-2.8091	-2.8091	-2.8091	-2.8091	2.40414	-2.8091	-2.8091	-2.8091	-2.8091	-2.8091	-2.8091	-2.8091	-2.8091	-2.8091	-2.8091	-2.8091	-2.8091	-2.8091	-2.8091
rno-piR-10111	-2.8091	-2.8091	-2.8091	-2.8091	-2.8091	-2.8091	-2.8091	-2.8091	-2.8091	-2.8091	-2.8091	-2.8091	-2.8091	-2.8091	-2.8091	-2.8091	-2.8091	-2.8091	-2.8091	-2.8091	-2.8091	0.563112	-2.8091	-2.8091
rno-piR-10112	-2.8091	-2.8091	-1.62376	-0.153685	-2.8091	-2.8091	4.36565	-2.8091	-2.8091	2.24363	-2.8091	-2.8091	7.10222	-2.8091	-2.8091	-2.8091	-2.8091	-2.8091	-2.8091	2.52915	-2.8091	-2.8091	-2.8091	-2.8091
rno-piR-10114	-2.8091	-2.8091	-0.851482	-2.8091	-2.8091	-0.403412	-2.8091	-2.8091	-2.8091	-2.8091	-2.8091	-2.8091	-2.8091	-2.8091	-2.8091	-2.8091	-2.8091	-2.8091	-2.8091	-2.8091	-2.8091	-2.8091	-2.8091	-2.8091
rno-piR-10116	-2.8091	-0.640445	-0.483425	0.627278	-2.8091	-0.403412	-2.8091	-2.8091	-2.8091	-2.8091	-2.8091	-2.8091	-2.8091	-0.203124	-2.8091	-2.8091	-2.8091	-2.8091	0.0317522	-2.8091	-2.8091	-2.8091	-2.8091	-2.8091
rno-piR-10117	-2.8091	-2.8091	-1.9595	-2.8091	-2.8091	-2.8091	-2.8091	-2.8091	-2.8091	-2.8091	-2.8091	-2.8091	-2.8091	-0.203124	-2.8091	-2.8091	-2.8091	-2.8091	-2.8091	-2.8091	-2.8091	-2.8091	-2.8091	-2.8091
rno-piR-10118	0.702996	-0.640445	-0.284903	0.290504	0.454729	-2.8091	4.08054	3.22282	-2.8091	2.24363	3.42752	4.53119	-2.8091	-2.8091	-2.8091	2.89581	-0.912094	0.340829	1.72527	4.87697	-2.8091	-2.8091	-2.8091	-2.8091
rno-piR-10119	-2.8091	-0.640445	-2.8091	-2.8091	-2.8091	-2.8091	-2.8091	-2.8091	-2.8091	-2.8091	-2.8091	-2.8091	-2.8091	-2.8091	-2.8091	-2.8091	-0.269622	-2.8091	-2.8091	-2.8091	-2.8091	-2.8091	-2.8091	-2.8091
rno-piR-1012	-2.8091	-2.8091	-1.9595	-2.8091	-2.8091	-2.8091	-2.8091	-2.8091	-2.8091	-2.8091	-2.8091	-2.8091	-2.8091	-2.8091	-2.8091	-2.8091	-2.8091	-2.8091	-2.8091	-2.8091	-2.8091	-2.8091	-2.8091	-2.8091
rno-piR-10120	-0.497571	-2.8091	-0.716865	-2.8091	-0.691621	0.338593	-2.8091	1.51844	-2.8091	-2.8091	1.01527	-2.8091	-2.8091	-0.857667	-2.8091	-2.8091	-2.8091	-2.8091	-2.8091	-2.8091	-2.8091	-2.8091	-2.8091	-2.8091
rno-piR-10121	-2.8091	-2.8091	-2.8091	-2.8091	-2.8091	-2.8091	-2.8091	-2.8091	5.0226	-2.8091	-2.8091	-2.8091	-2.8091	-2.8091	-2.8091	-2.8091	-2.8091	-2.8091	-2.8091	-2.8091	-2.8091	-2.8091	-2.8091	-2.8091
rno-piR-10122	-2.8091	-2.8091	-1.9595	-0.817012	-2.8091	-2.8091	-2.8091	-2.8091	-2.8091	-2.8091	-2.8091	-2.8091	-2.8091	-2.8091	-2.8091	-2.8091	-2.8091	-2.8091	-2.8091	-2.8091	-2.8091	-2.8091	-2.8091	-2.8091
rno-piR-10123	-2.8091	-2.8091	-1.9595	-2.8091	-2.8091	-2.8091	-2.8091	-2.8091	-2.8091	-2.8091	-2.8091	-2.8091	-2.8091	-2.8091	-2.8091	-2.8091	-2.8091	-2.8091	-2.8091	-2.8091	-2.8091	-2.8091	-2.8091	-2.8091
rno-piR-10124	-2.8091	-0.246323	0.180423	-0.817012	-2.8091	-0.403412	-2.8091	-2.8091	-2.8091	-2.8091	-2.8091	-2.8091	-2.8091	-0.857667	-2.8091	-2.8091	-0.269622	-0.401497	1.34924	3.09063	-2.8091	-2.8091	-2.8091	-2.8091
rno-piR-10125	-2.8091	-2.8091	-2.8091	-2.8091	-0.691621	-2.8091	2.94032	-2.8091	-2.8091	-2.8091	-2.8091	-2.8091	-2.8091	-2.8091	-2.8091	-2.8091	-2.8091	-0.401497	0.0317522	-2.8091	-2.8091	-2.8091	-2.8091	-2.8091
rno-piR-10126	-2.8091	-2.8091	-2.8091	-2.8091	-2.8091	-2.8091	-2.8091	-2.8091	-2.8091	-2.8091	-2.8091	-2.8091	-2.8091	-2.8091	-2.8091	-2.8091	-2.8091	-2.8091	0.0317522	-2.8091	-2.8091	1.42735	-2.8091	-2.8091
rno-piR-1013	-0.497571	-2.8091	-1.9595	-2.8091	-2.8091	-2.8091	3.25166	-2.8091	-2.8091	-0.291042	-2.8091	2.03091	-2.8091	-0.857667	-2.8091	-2.8091	-0.912094	-0.401497	1.34924	-2.8091	-2.8091	-2.8091	-2.8091	-2.8091
rno-piR-10131	-2.8091	-2.8091	-1.9595	-2.8091	-2.8091	-2.8091	-2.8091	-2.8091	3.24626	-2.8091	-2.8091	-2.8091	-2.8091	-2.8091	-2.8091	-2.8091	-2.8091	-0.401497	-2.8091	-2.8091	-2.8091	-2.8091	-2.8091	-2.8091
rno-piR-10135	-2.8091	-2.8091	-2.8091	-2.8091	-2.8091	-2.8091	-2.8091	-2.8091	-2.8091	-2.8091	-2.8091	-2.8091	-2.8091	-2.8091	-2.8091	-2.8091	-2.8091	-2.8091	-2.8091	-0.305325	-2.8091	-2.8091	-2.8091	-2.8091
rno-piR-10136	-0.497571	-2.8091	-1.37586	-2.8091	-2.8091	-2.8091	-2.8091	-2.8091	2.2881	-2.8091	-2.8091	-2.8091	-2.8091	-2.8091	-2.8091	-2.8091	-2.8091	-2.8091	-2.8091	1.5964	-2.8091	-2.8091	-2.8091	-2.8091
rno-piR-10138	-2.8091	-2.8091	-1.9595	-2.8091	-2.8091	-2.8091	-2.8091	-2.8091	-2.8091	-2.8091	-2.8091	-2.8091	-2.8091	-2.8091	-2.8091	-2.8091	-2.8091	-2.8091	-2.8091	-2.8091	-2.8091	-2.8091	-2.8091	-2.8091
rno-piR-10139	-2.8091	0.308753	-0.594968	0.290504	0.454729	0.338593	3.72484	-2.8091	-2.8091	2.91107	-2.8091	-2.8091	-2.8091	-2.8091	-2.8091	-2.8091	-2.8091	-2.8091	0.838007	-2.8091	-2.8091	-2.8091	-2.8091	-2.8091
rno-piR-1014	1.05817	-2.8091	1.00493	2.33716	-0.691621	0.821078	3.50757	1.51844	-2.8091	2.67978	3.83307	-2.8091	6.659	0.570591	-2.8091	-2.8091	-2.8091	-2.8091	2.6637	1.5964	-2.8091	2.91032	-2.8091	3.56495
rno-piR-10140	-2.8091	-0.640445	-1.9595	-2.8091	-0.691621	1.18072	-2.8091	-2.8091	-2.8091	1.85633	-2.8091	-2.8091	-2.8091	-2.8091	-2.8091	-2.8091	-2.8091	-2.8091	-2.8091	-2.8091	-2.8091	-2.8091	-2.8091	-2.8091
rno-piR-10141	-0.497571	-2.8091	-2.8091	-2.8091	-2.8091	-0.403412	-2.8091	-2.8091	-2.8091	-2.8091	-2.8091	-2.8091	-2.8091	-2.8091	-2.8091	-2.8091	-2.8091	-2.8091	0.0317522	-2.8091	-2.8091	-2.8091	-2.8091	-2.8091
rno-piR-10142	-0.497571	-2.8091	-1.17414	-2.8091	-2.8091	-2.8091	-2.8091	-2.8091	-2.8091	-2.8091	-2.8091	-2.8091	-2.8091	-2.8091	-2.8091	-2.8091	-2.8091	-0.401497	-2.8091	-2.8091	-2.8091	-2.8091	-2.8091	-2.8091
rno-piR-10143	-2.8091	-2.8091	-1.37586	0.290504	-2.8091	0.821078	-2.8091	-2.8091	-2.8091	-0.291042	-2.8091	-2.8091	6.659	-2.8091	-2.8091	-2.8091	-2.8091	-2.8091	0.0317522	-2.8091	-2.8091	-2.8091	-2.8091	-2.8091
rno-piR-10144	-2.8091	-2.8091	-1.17414	-2.8091	-2.8091	-2.8091	-2.8091	-2.8091	-2.8091	-2.8091	-2.8091	-2.8091	-2.8091	-2.8091	-2.8091	-2.8091	-2.8091	-2.8091	0.0317522	-2.8091	-2.8091	-2.8091	-2.8091	-2.8091
rno-piR-10145	-2.8091	-2.8091	-1.9595	-2.8091	-2.8091	-2.8091	-2.8091	-2.8091	-2.8091	-2.8091	-2.8091	-2.8091	-2.8091	-2.8091	-2.8091	-2.8091	-2.8091	-2.8091	1.34924	-2.8091	-2.8091	-2.8091	-2.8091	-2.8091
rno-piR-10146	-2.8091	-2.8091	-1.00219	-2.8091	-2.8091	-2.8091	-2.8091	-2.8091	-2.8091	-2.8091	-2.8091	-2.8091	-2.8091	-0.857667	-2.8091	-2.8091	-2.8091	-0.401497	-2.8091	1.83752	-2.8091	-2.8091	-2.8091	-2.8091
rno-piR-10147	-2.8091	-2.8091	-2.8091	-2.8091	-2.8091	-2.8091	-2.8091	-2.8091	-2.8091	-2.8091	-2.8091	-2.8091	-2.8091	-2.8091	-2.8091	-2.8091	-2.8091	-0.401497	-2.8091	-2.8091	-2.8091	-2.8091	-2.8091	-2.8091
rno-piR-10148	-2.8091	-2.8091	-2.8091	-2.8091	-2.8091	-0.403412	-2.8091	-2.8091	-2.8091	-2.8091	-2.8091	-2.8091	-2.8091	-2.8091	-2.8091	0.370133	-2.8091	-2.8091	-2.8091	-2.8091	-2.8091	-2.8091	-2.8091	-2.8091
rno-piR-10149	-2.8091	-2.8091	-1.62376	-2.8091	-0.691621	-2.8091	-2.8091	-2.8091	-2.8091	-2.8091	-2.8091	-2.8091	-2.8091	-2.8091	4.41621	-2.8091	-2.8091	-0.401497	0.0317522	-2.8091	-2.8091	-2.8091	-2.8091	-2.8091
rno-piR-1015	-2.8091	-1.21021	-1.62376	-2.8091	-0.00243066	-2.8091	-2.8091	-2.8091	-2.8091	-2.8091	-2.8091	5.26105	-2.8091	-2.8091	-2.8091	-2.8091	-0.912094	-2.8091	1.34924	-2.8091	-2.8091	1.42735	-2.8091	-2.8091
rno-piR-10150	-0.497571	0.308753	0.180423	1.79104	-0.00243066	-2.8091	-2.8091	-2.8091	-2.8091	-0.291042	-2.8091	-2.8091	-2.8091	-2.8091	-2.8091	-2.8091	-0.269622	1.18319	2.02303	-2.8091	-2.8091	-2.8091	-2.8091	-2.8091
rno-piR-10152	-0.497571	-2.8091	-1.62376	-2.8091	-2.8091	-2.8091	-2.8091	2.75461	-2.8091	-2.8091	-2.8091	-2.8091	-2.8091	-2.8091	-2.8091	-2.8091	-0.912094	-2.8091	-2.8091	3.18077	-2.8091	-2.8091	-2.8091	-2.8091
rno-piR-10154	-2.8091	-2.8091	-1.17414	-2.8091	-2.8091	-2.8091	-2.8091	-2.8091	-2.8091	-2.8091	-2.8091	-2.8091	-2.8091	-2.8091	-2.8091	-2.8091	-2.8091	-2.8091	-2.8091	-0.305325	-2.8091	-2.8091	-2.8091	-2.8091
rno-piR-10155	-2.8091	-1.21021	-1.9595	-2.8091	-2.8091	-2.8091	-2.8091	1.51844	-2.8091	-0.291042	-2.8091	-2.8091	-2.8091	-2.8091	-2.8091	-2.8091	-0.912094	-2.8091	-2.8091	-2.8091	-2.8091	-2.8091	-2.8091	-2.8091
rno-piR-10156	-0.497571	-2.8091	-0.851482	-2.8091	-0.00243066	-0.403412	-2.8091	-2.8091	-2.8091	-2.8091	-2.8091	-2.8091	-2.8091	-2.8091	-2.8091	-2.8091	-2.8091	-0.401497	-2.8091	0.45269	-2.8091	-2.8091	-2.8091	-2.8091
rno-piR-10157	-2.8091	-2.8091	-2.8091	-2.8091	-0.691621	-2.8091	-2.8091	-2.8091	-2.8091	-2.8091	-2.8091	-2.8091	-2.8091	-2.8091	-2.8091	-2.8091	-2.8091	-2.8091	-2.8091	-2.8091	-2.8091	-2.8091	-2.8091	-2.8091
rno-piR-10159	-2.8091	-1.21021	-2.8091	-2.8091	-0.691621	-2.8091	-2.8091	-2.8091	-2.8091	-2.8091	-2.8091	-2.8091	-2.8091	-2.8091	-2.8091	-2.8091	-2.8091	-0.401497	-2.8091	-2.8091	-2.8091	-2.8091	-2.8091	-2.8091
rno-piR-10163	-2.8091	-2.8091	-2.8091	-2.8091	-2.8091	-2.8091	-2.8091	-2.8091	-2.8091	-2.8091	-2.8091	-2.8091	-2.8091	-2.8091	-2.8091	0.370133	-2.8091	-2.8091	-2.8091	-2.8091	-2.8091	-2.8091	-2.8091	-2.8091
rno-piR-10167	-2.8091	-2.8091	-1.9595	-2.8091	-2.8091	-0.403412	-2.8091	-2.8091	-2.8091	-2.8091	-2.8091	-2.8091	-2.8091	-2.8091	-2.8091	-2.8091	-2.8091	-2.8091	-2.8091	-2.8091	-2.8091	-2.8091	-2.8091	-2.8091
rno-piR-10169	-2.8091	-2.8091	-1.9595	-2.8091	-2.8091	-2.8091	-2.8091	-2.8091	-2.8091	-2.8091	-2.8091	-2.8091	-2.8091	-2.8091	-2.8091	-2.8091	-2.8091	-2.8091	-2.8091	-2.8091	-2.8091	-2.8091	-2.8091	-2.8091
rno-piR-1017	-2.8091	-2.8091	-1.62376	-2.8091	-2.8091	-2.8091	-2.8091	-2.8091	-2.8091	-2.8091	-2.8091	-2.8091	-2.8091	-2.8091	-2.8091	-2.8091	-2.8091	-2.8091	-2.8091	-2.8091	-2.8091	-2.8091	-2.8091	-2.8091
rno-piR-10171	-2.8091	-2.8091	-2.8091	-2.8091	-2.8091	-2.8091	-2.8091	-2.8091	-2.8091	-2.8091	-2.8091	-2.8091	-2.8091	-0.857667	-2.8091	-2.8091	-2.8091	-2.8091	-2.8091	-2.8091	-2.8091	-2.8091	-2.8091	0.944813
rno-piR-10172	-2.8091	-1.21021	-1.37586	-2.8091	-2.8091	-2.8091	-2.8091	-2.8091	-2.8091	-2.8091	-2.8091	-2.8091	-2.8091	-0.857667	-2.8091	-2.8091	-2.8091	-2.8091	-2.8091	-2.8091	-2.8091	-2.8091	-2.8091	4.20444
rno-piR-10173	-2.8091	-2.8091	-2.8091	-2.8091	-0.691621	-2.8091	-2.8091	-2.8091	-2.8091	-2.8091	-2.8091	-2.8091	-2.8091	-2.8091	-2.8091	-2.8091	-2.8091	-2.8091	-2.8091	-2.8091	-2.8091	-2.8091	-2.8091	-2.8091
rno-piR-10174	-2.8091	-2.8091	-1.9595	-2.8091	-2.8091	-2.8091	-2.8091	-2.8091	-2.8091	-2.8091	-2.8091	-2.8091	-2.8091	-2.8091	-2.8091	-2.8091	-2.8091	-2.8091	-2.8091	-2.8091	-2.8091	-2.8091	-2.8091	-2.8091
rno-piR-10175	-2.8091	-2.8091	-1.17414	-2.8091	-2.8091	-2.8091	-2.8091	-2.8091	-2.8091	-2.8091	-2.8091	-2.8091	-2.8091	-2.8091	-2.8091	-2.8091	-2.8091	-2.8091	-2.8091	-2.8091	-2.8091	-2.8091	-2.8091	-2.8091
rno-piR-1018	-2.8091	-0.246323	-1.37586	-2.8091	-2.8091	-2.8091	-2.8091	-2.8091	-2.8091	-2.8091	-2.8091	-2.8091	-2.8091	-2.8091	-2.8091	-2.8091	-2.8091	-2.8091	0.0317522	-2.8091	-2.8091	-2.8091	-2.8091	-2.8091
rno-piR-10180	-2.8091	-2.8091	-0.851482	-2.8091	-2.8091	-2.8091	-2.8091	-2.8091	-2.8091	-2.8091	-2.8091	-2.8091	-2.8091	-2.8091	-2.8091	-2.8091	-0.912094	-2.8091	0.838007	-2.8091	-2.8091	0.563112	-2.8091	-2.8091
rno-piR-10181	-2.8091	-0.640445	-0.594968	-0.817012	-0.691621	0.338593	-2.8091	-2.8091	-2.8091	0.469226	-2.8091	-2.8091	-2.8091	-0.857667	-2.8091	-2.8091	-2.8091	-2.8091	0.0317522	-2.8091	-2.8091	-2.8091	-2.8091	-2.8091
rno-piR-10182	-2.8091	-2.8091	-1.62376	-2.8091	-2.8091	-2.8091	-2.8091	-2.8091	-2.8091	-2.8091	-2.8091	-2.8091	-2.8091	-2.8091	-2.8091	-2.8091	-2.8091	0.340829	-2.8091	-2.8091	-2.8091	-2.8091	-2.8091	-2.8091
rno-piR-10183	-2.8091	-2.8091	-2.8091	-2.8091	-0.691621	-2.8091	-2.8091	-2.8091	-2.8091	-2.8091	-2.8091	-2.8091	-2.8091	-2.8091	-2.8091	-2.8091	-2.8091	-2.8091	-2.8091	-2.8091	-2.8091	-2.8091	-2.8091	-2.8091
rno-piR-10186	0.228153	-2.8091	0.0420094	0.627278	-0.00243066	0.821078	4.80781	2.44751	-2.8091	-0.291042	-2.8091	-2.8091	-2.8091	0.840636	-2.8091	0.370133	0.163835	0.823464	0.838007	-0.305325	-2.8091	-2.8091	-2.8091	-2.8091
rno-piR-10187	-2.8091	-2.8091	-2.8091	-2.8091	-2.8091	-0.403412	-2.8091	-2.8091	-2.8091	-2.8091	-2.8091	-2.8091	-2.8091	-2.8091	-2.8091	3.08165	-2.8091	-2.8091	-2.8091	-2.8091	-2.8091	-2.8091	-2.8091	-2.8091
rno-piR-10189	-2.8091	-2.8091	-1.9595	-2.8091	-0.691621	-2.8091	-2.8091	-2.8091	-2.8091	-2.8091	-2.8091	-2.8091	-2.8091	-2.8091	-2.8091	-2.8091	-2.8091	-2.8091	-2.8091	-2.8091	-2.8091	-2.8091	-2.8091	-2.8091
rno-piR-1019	1.96108	0.868485	1.75962	2.79968	1.83985	1.18072	2.54268	-2.8091	-2.8091	2.91107	4.40845	-2.8091	-2.8091	0.840636	-2.8091	-2.8091	1.88445	0.823464	3.54048	-2.8091	-2.8091	5.08954	-2.8091	-2.8091
rno-piR-10190	-0.497571	-2.8091	-1.37586	-2.8091	-0.691621	-2.8091	-2.8091	-2.8091	-2.8091	-2.8091	-2.8091	-2.8091	-2.8091	-2.8091	-2.8091	-2.8091	-2.8091	-2.8091	-2.8091	-2.8091	-2.8091	-2.8091	-2.8091	-2.8091
rno-piR-10191	-2.8091	-2.8091	-0.111754	-0.817012	-0.00243066	-2.8091	-2.8091	-2.8091	-2.8091	-2.8091	-2.8091	-2.8091	-2.8091	-2.8091	-2.8091	-2.8091	-2.8091	-0.401497	-2.8091	-2.8091	-2.8091	-2.8091	-2.8091	-2.8091
rno-piR-10192	-2.8091	-1.21021	-1.9595	-2.8091	-2.8091	-2.8091	-2.8091	-2.8091	-2.8091	-2.8091	-2.8091	-2.8091	-2.8091	-2.8091	-2.8091	-2.8091	-0.912094	-2.8091	-2.8091	-2.8091	-2.8091	-2.8091	-2.8091	-2.8091
rno-piR-10193	-2.8091	-2.8091	-2.8091	-2.8091	-2.8091	-2.8091	-2.8091	-2.8091	-2.8091	-2.8091	-2.8091	-2.8091	-2.8091	-2.8091	-2.8091	-2.8091	-2.8091	-2.8091	-2.8091	-2.8091	-2.8091	3.4772	-2.8091	-2.8091
rno-piR-10194	-0.497571	0.0587823	1.14503	1.32426	1.98073	1.70704	-2.8091	-2.8091	2.2881	2.24363	3.42752	-2.8091	-2.8091	1.26331	-2.8091	-2.8091	1.64266	0.340829	2.02303	4.20186	-2.8091	-2.8091	-2.8091	-2.8091
rno-piR-10195	-2.8091	-2.8091	-2.8091	-2.8091	-2.8091	-2.8091	-2.8091	-2.8091	-2.8091	-2.8091	-2.8091	2.03091	-2.8091	-2.8091	-2.8091	-2.8091	-2.8091	-2.8091	-2.8091	-2.8091	-2.8091	-2.8091	-2.8091	-2.8091
rno-piR-10196	-0.497571	-2.8091	-1.9595	-2.8091	-2.8091	-2.8091	-2.8091	-2.8091	-2.8091	-2.8091	-2.8091	-2.8091	-2.8091	-2.8091	-2.8091	-2.8091	-0.912094	-2.8091	-2.8091	-2.8091	-2.8091	-2.8091	-2.8091	-2.8091
rno-piR-10198	-2.8091	-1.21021	-0.851482	-0.817012	-2.8091	-2.8091	-2.8091	-2.8091	-2.8091	0.960112	-2.8091	-2.8091	-2.8091	-2.8091	-2.8091	-2.8091	-2.8091	-2.8091	0.0317522	-2.8091	-2.8091	-2.8091	-2.8091	-2.8091
rno-piR-10199	-2.8091	-2.8091	-1.9595	-2.8091	-2.8091	-2.8091	-2.8091	-2.8091	-2.8091	-2.8091	-2.8091	-2.8091	-2.8091	-2.8091	-2.8091	-2.8091	-2.8091	-2.8091	-2.8091	-2.8091	-2.8091	-2.8091	-2.8091	-2.8091
rno-piR-1020	-2.8091	-1.21021	-1.17414	0.627278	-2.8091	-2.8091	-2.8091	-2.8091	-2.8091	-2.8091	-2.8091	3.54872	-2.8091	-0.857667	-2.8091	-2.8091	-0.269622	-2.8091	-2.8091	-0.305325	-2.8091	-2.8091	-2.8091	-2.8091
rno-piR-10200	-0.497571	-2.8091	-1.9595	-2.8091	-2.8091	-2.8091	1.99161	-2.8091	-2.8091	-2.8091	-2.8091	-2.8091	-2.8091	-2.8091	-2.8091	-2.8091	-2.8091	-2.8091	-2.8091	-2.8091	-2.8091	-2.8091	-2.8091	-2.8091
rno-piR-10201	-2.8091	-2.8091	-1.9595	-2.8091	-2.8091	-2.8091	-2.8091	-2.8091	-2.8091	-2.8091	-2.8091	-2.8091	-2.8091	-2.8091	-2.8091	-2.8091	-2.8091	-2.8091	-2.8091	-2.8091	-2.8091	-2.8091	-2.8091	-2.8091
rno-piR-10202	-2.8091	-2.8091	-2.8091	-2.8091	-2.8091	-2.8091	-2.8091	-2.8091	-2.8091	-2.8091	-2.8091	-2.8091	-2.8091	-2.8091	-2.8091	-2.8091	-2.8091	-0.401497	-2.8091	-2.8091	-2.8091	-2.8091	-2.8091	-2.8091
rno-piR-10203	-2.8091	-2.8091	-1.9595	-2.8091	-2.8091	-2.8091	-2.8091	-2.8091	-2.8091	-2.8091	-2.8091	-2.8091	-2.8091	-2.8091	-2.8091	-2.8091	-2.8091	-2.8091	-2.8091	-2.8091	-2.8091	-2.8091	-2.8091	-2.8091
rno-piR-10204	-2.8091	-2.8091	-2.8091	-2.8091	-2.8091	-0.403412	3.25166	-2.8091	-2.8091	-2.8091	-2.8091	-2.8091	-2.8091	-2.8091	-2.8091	-2.8091	-0.269622	-2.8091	-2.8091	-2.8091	-2.8091	-2.8091	-2.8091	-2.8091
rno-piR-10206	-2.8091	-1.21021	-1.37586	0.290504	-2.8091	-2.8091	-2.8091	-2.8091	-2.8091	-2.8091	-2.8091	4.53119	-2.8091	-2.8091	-2.8091	-2.8091	-2.8091	-2.8091	0.0317522	1.30646	-2.8091	1.96264	-2.8091	0.944813
rno-piR-10207	0.228153	1.14769	2.34164	3.62902	1.98073	1.18072	-2.8091	-2.8091	-2.8091	2.24363	1.01527	-2.8091	-2.8091	1.06754	-2.8091	-2.8091	1.88445	1.70961	1.72527	6.64691	-2.8091	-2.8091	-2.8091	4.20444
rno-piR-10209	-2.8091	-1.21021	-1.00219	-2.8091	-0.691621	-2.8091	-2.8091	-2.8091	-2.8091	-2.8091	-2.8091	-2.8091	-2.8091	-2.8091	-2.8091	-2.8091	-2.8091	-2.8091	0.0317522	-2.8091	-2.8091	-2.8091	-2.8091	-2.8091
rno-piR-1021	-2.8091	-2.8091	-1.9595	-2.8091	-2.8091	-2.8091	-2.8091	-2.8091	-2.8091	-2.8091	-2.8091	-2.8091	-2.8091	-2.8091	-2.8091	-2.8091	-2.8091	-2.8091	-2.8091	-2.8091	-2.8091	-2.8091	-2.8091	-2.8091
rno-piR-10210	-2.8091	-2.8091	-1.9595	-2.8091	-2.8091	-2.8091	-2.8091	-2.8091	-2.8091	-2.8091	-2.8091	-2.8091	-2.8091	-2.8091	-2.8091	-2.8091	-2.8091	-2.8091	-2.8091	0.45269	-2.8091	-2.8091	-2.8091	-2.8091
rno-piR-10211	-0.497571	-2.8091	-2.8091	-2.8091	-0.691621	-2.8091	-2.8091	-2.8091	-2.8091	-2.8091	-2.8091	-2.8091	-2.8091	-2.8091	-2.8091	-2.8091	-2.8091	-2.8091	-2.8091	-2.8091	-2.8091	0.563112	-2.8091	-2.8091
rno-piR-10213	-2.8091	-2.8091	-2.8091	-0.817012	-2.8091	-2.8091	-2.8091	-2.8091	-2.8091	-2.8091	-2.8091	-2.8091	-2.8091	-2.8091	-2.8091	-2.8091	-2.8091	-2.8091	-2.8091	-2.8091	-2.8091	-2.8091	-2.8091	-2.8091
rno-piR-10214	-2.8091	-1.21021	-0.0327353	-2.8091	-0.691621	0.338593	-2.8091	-2.8091	-2.8091	-2.8091	-2.8091	-2.8091	-2.8091	-0.203124	-2.8091	-2.8091	-0.912094	-0.401497	-2.8091	-2.8091	-2.8091	-2.8091	-2.8091	-2.8091
rno-piR-10215	0.228153	-2.8091	-0.716865	-0.817012	-2.8091	-2.8091	-2.8091	-2.8091	-2.8091	-2.8091	-2.8091	-2.8091	-2.8091	-2.8091	-2.8091	-2.8091	-2.8091	-0.401497	-2.8091	-2.8091	-2.8091	-2.8091	-2.8091	-2.8091
rno-piR-10216	-0.497571	-2.8091	-0.594968	-2.8091	-0.691621	-2.8091	-2.8091	-2.8091	-2.8091	-2.8091	-2.8091	-2.8091	-2.8091	-2.8091	-2.8091	-2.8091	-0.269622	-2.8091	-2.8091	-2.8091	-2.8091	3.62555	-2.8091	-2.8091
rno-piR-10217	-0.497571	-2.8091	-2.8091	-2.8091	-2.8091	-0.403412	1.08683	-2.8091	-2.8091	-2.8091	-2.8091	-2.8091	-2.8091	-2.8091	-2.8091	-2.8091	-2.8091	-0.401497	-2.8091	-2.8091	-2.8091	-2.8091	-2.8091	-2.8091
rno-piR-1022	-0.497571	-1.21021	-0.594968	-2.8091	-0.691621	-0.403412	-2.8091	-2.8091	-2.8091	-2.8091	-2.8091	-2.8091	-2.8091	-2.8091	-2.8091	-2.8091	-2.8091	-2.8091	-2.8091	-2.8091	-2.8091	-2.8091	-2.8091	-2.8091
rno-piR-10220	-2.8091	-2.8091	-1.9595	-2.8091	-2.8091	-2.8091	-2.8091	-2.8091	-2.8091	-2.8091	-2.8091	-2.8091	-2.8091	-2.8091	-2.8091	-2.8091	-2.8091	-2.8091	-2.8091	-2.8091	-2.8091	-2.8091	-2.8091	-2.8091
rno-piR-10221	-2.8091	-2.8091	-1.9595	-2.8091	-2.8091	-2.8091	-2.8091	-2.8091	-2.8091	-2.8091	-2.8091	-2.8091	-2.8091	-2.8091	-2.8091	-2.8091	-0.912094	-2.8091	-2.8091	-2.8091	-2.8091	-2.8091	-2.8091	-2.8091
rno-piR-10222	-2.8091	-2.8091	-0.851482	-0.817012	-0.691621	-2.8091	-2.8091	-2.8091	-2.8091	-2.8091	-2.8091	-2.8091	-2.8091	-2.8091	-2.8091	0.370133	-0.912094	-2.8091	-2.8091	-2.8091	-2.8091	-2.8091	-2.8091	-2.8091
rno-piR-10223	-2.8091	-2.8091	-1.17414	-2.8091	-2.8091	-2.8091	-2.8091	-2.8091	-2.8091	-2.8091	-2.8091	-2.8091	-2.8091	-2.8091	-2.8091	-2.8091	-2.8091	-2.8091	-2.8091	-2.8091	-2.8091	-2.8091	-2.8091	-2.8091
rno-piR-10224	-2.8091	-2.8091	-0.594968	-2.8091	0.454729	-0.403412	-2.8091	-2.8091	-2.8091	-2.8091	-2.8091	-2.8091	-2.8091	-2.8091	-2.8091	-2.8091	-0.912094	0.823464	-2.8091	-2.8091	-2.8091	-2.8091	-2.8091	-2.8091
rno-piR-10225	-2.8091	-2.8091	-2.8091	-2.8091	-2.8091	-2.8091	-2.8091	-2.8091	-2.8091	-2.8091	-2.8091	-2.8091	-2.8091	-2.8091	-2.8091	-2.8091	-0.912094	-2.8091	-2.8091	-2.8091	-2.8091	-2.8091	-2.8091	-2.8091
rno-piR-10226	-2.8091	-1.21021	-2.8091	-2.8091	-2.8091	-2.8091	-2.8091	-2.8091	-2.8091	-2.8091	-2.8091	-2.8091	-2.8091	-2.8091	-2.8091	-2.8091	-2.8091	-2.8091	-2.8091	-2.8091	-2.8091	-2.8091	-2.8091	-2.8091
rno-piR-10227	-2.8091	-2.8091	-1.37586	-2.8091	-2.8091	-2.8091	-2.8091	-2.8091	-2.8091	-2.8091	-2.8091	-2.8091	-2.8091	-0.857667	-2.8091	-2.8091	-2.8091	-2.8091	-2.8091	-2.8091	-2.8091	-2.8091	-2.8091	-2.8091
rno-piR-10228	-2.8091	-1.21021	-1.62376	-2.8091	-2.8091	-0.403412	-2.8091	-2.8091	-2.8091	-2.8091	-2.8091	-2.8091	-2.8091	-0.857667	-2.8091	-2.8091	-2.8091	-0.401497	-2.8091	-2.8091	-2.8091	-2.8091	-2.8091	-2.8091
rno-piR-10230	-2.8091	-2.8091	-1.9595	-2.8091	-2.8091	-2.8091	-2.8091	-2.8091	-2.8091	-2.8091	-2.8091	-2.8091	-2.8091	-2.8091	-2.8091	-2.8091	-2.8091	-2.8091	-2.8091	-2.8091	-2.8091	-2.8091	-2.8091	-2.8091
rno-piR-10231	-2.8091	-0.246323	0.628027	1.12746	-0.691621	-2.8091	-2.8091	-2.8091	-2.8091	-2.8091	-2.8091	-2.8091	-2.8091	-0.203124	-2.8091	-2.8091	0.7614	-2.8091	-2.8091	-2.8091	-2.8091	-2.8091	-2.8091	-2.8091
rno-piR-10232	-2.8091	-2.8091	-2.8091	-2.8091	-2.8091	-2.8091	2.94032	-2.8091	-2.8091	-2.8091	-2.8091	-2.8091	-2.8091	-2.8091	-2.8091	-2.8091	-0.912094	-2.8091	-2.8091	-2.8091	-2.8091	-2.8091	-2.8091	-2.8091
rno-piR-10233	-0.497571	-2.8091	-0.483425	-2.8091	-2.8091	-2.8091	-2.8091	-2.8091	-2.8091	0.469226	1.9153	-2.8091	-2.8091	0.570591	-2.8091	-2.8091	-2.8091	-2.8091	-2.8091	-2.8091	-2.8091	-2.8091	-2.8091	-2.8091
rno-piR-10234	-2.8091	-2.8091	-2.8091	-2.8091	-2.8091	-2.8091	-2.8091	-2.8091	5.21366	-2.8091	-2.8091	-2.8091	-2.8091	-2.8091	-2.8091	-2.8091	-2.8091	-2.8091	-2.8091	-2.8091	-2.8091	-2.8091	-2.8091	-2.8091
rno-piR-10235	-2.8091	-2.8091	-1.37586	-0.817012	-2.8091	-2.8091	-2.8091	-2.8091	-2.8091	0.960112	-2.8091	-2.8091	-2.8091	-2.8091	-2.8091	-2.8091	-2.8091	-0.401497	-2.8091	-2.8091	-2.8091	-2.8091	-2.8091	-2.8091
rno-piR-10236	-2.8091	-2.8091	-2.8091	0.627278	-2.8091	-2.8091	1.08683	-2.8091	-2.8091	-2.8091	-2.8091	-2.8091	-2.8091	-2.8091	-2.8091	-2.8091	-2.8091	-2.8091	-2.8091	2.38485	-2.8091	-2.8091	-2.8091	-2.8091
rno-piR-10240	-2.8091	-2.8091	-2.8091	-2.8091	-2.8091	-2.8091	-2.8091	0.646749	-2.8091	-0.291042	-2.8091	-2.8091	-2.8091	-2.8091	-2.8091	-2.8091	-2.8091	-2.8091	-2.8091	-2.8091	-2.8091	-2.8091	-2.8091	-2.8091
rno-piR-10243	-2.8091	-1.21021	-1.9595	-2.8091	-0.00243066	-2.8091	-2.8091	-2.8091	-2.8091	-2.8091	-2.8091	-2.8091	-2.8091	-0.857667	-2.8091	-2.8091	-2.8091	-2.8091	-2.8091	-0.305325	-2.8091	-2.8091	-2.8091	-2.8091
rno-piR-10244	-2.8091	-2.8091	-2.8091	-2.8091	-2.8091	-2.8091	1.08683	-2.8091	-2.8091	0.960112	-2.8091	4.75105	-2.8091	-2.8091	-2.8091	-2.8091	-2.8091	-0.401497	-2.8091	-2.8091	-2.8091	-2.8091	-2.8091	-2.8091
rno-piR-10248	-2.8091	-2.8091	-1.9595	-2.8091	-2.8091	-2.8091	-2.8091	-2.8091	-2.8091	-2.8091	-2.8091	-2.8091	-2.8091	-2.8091	-2.8091	-2.8091	-2.8091	-2.8091	-2.8091	-2.8091	-2.8091	-2.8091	-2.8091	-2.8091
rno-piR-10249	-2.8091	-2.8091	-1.9595	-2.8091	-2.8091	-0.403412	-2.8091	-2.8091	-2.8091	-2.8091	-2.8091	-2.8091	-2.8091	-2.8091	-2.8091	-2.8091	-2.8091	-2.8091	-2.8091	-2.8091	-2.8091	-2.8091	-2.8091	-2.8091
rno-piR-1025	-2.8091	-1.21021	-0.284903	-0.153685	0.454729	-2.8091	3.25166	-2.8091	-2.8091	2.06297	-2.8091	-2.8091	-2.8091	-0.203124	3.43517	2.12834	-0.269622	-2.8091	2.48009	3.2656	-2.8091	-2.8091	-2.8091	-2.8091
rno-piR-10250	-0.497571	-2.8091	-0.594968	-2.8091	-0.00243066	0.338593	-2.8091	-2.8091	-2.8091	-2.8091	-2.8091	-2.8091	-2.8091	-2.8091	-2.8091	-2.8091	-2.8091	-0.401497	-2.8091	-2.8091	-2.8091	1.96264	-2.8091	-2.8091
rno-piR-10251	-2.8091	-2.8091	-1.62376	-2.8091	-2.8091	-2.8091	-2.8091	-2.8091	-2.8091	-2.8091	-2.8091	-2.8091	-2.8091	-2.8091	-2.8091	-2.8091	-2.8091	-2.8091	-2.8091	-2.8091	-2.8091	-2.8091	-2.8091	-2.8091
rno-piR-10252	-0.497571	-1.21021	-0.483425	-2.8091	-0.691621	-2.8091	1.08683	-2.8091	-2.8091	-2.8091	-2.8091	7.76315	-2.8091	-2.8091	-2.8091	-2.8091	-2.8091	-2.8091	1.34924	-2.8091	-2.8091	-2.8091	-2.8091	-2.8091
rno-piR-10253	-2.8091	-2.8091	-2.8091	0.290504	-2.8091	-2.8091	-2.8091	-2.8091	-2.8091	-2.8091	-2.8091	-2.8091	-2.8091	-2.8091	-2.8091	-2.8091	-2.8091	-2.8091	-2.8091	-2.8091	-2.8091	0.563112	-2.8091	-2.8091
rno-piR-10255	0.228153	-0.246323	1.21025	0.290504	0.79938	1.18072	4.23013	-2.8091	-2.8091	0.469226	-2.8091	-2.8091	-2.8091	1.43551	-2.8091	-2.8091	0.986392	0.823464	0.838007	3.96878	-2.8091	-2.8091	-2.8091	4.73806
rno-piR-10256	-2.8091	-1.21021	-1.37586	-2.8091	-2.8091	-2.8091	-2.8091	-2.8091	-2.8091	-2.8091	-2.8091	-2.8091	-2.8091	-2.8091	-2.8091	-2.8091	-2.8091	-2.8091	-2.8091	-2.8091	-2.8091	-2.8091	-2.8091	-2.8091
rno-piR-10257	-2.8091	-2.8091	-1.62376	-2.8091	-2.8091	-2.8091	-2.8091	-2.8091	-2.8091	-2.8091	-2.8091	-2.8091	-2.8091	-2.8091	-2.8091	-2.8091	-2.8091	-2.8091	-2.8091	-2.8091	-2.8091	-2.8091	-2.8091	-2.8091
rno-piR-10260	-2.8091	-0.640445	0.765054	1.12746	-0.691621	0.338593	-2.8091	-2.8091	-2.8091	-0.291042	-2.8091	-2.8091	-2.8091	-0.857667	-2.8091	-2.8091	-0.912094	0.823464	-2.8091	-2.8091	-2.8091	-2.8091	-2.8091	-2.8091
rno-piR-10261	-2.8091	-2.8091	-1.9595	-2.8091	0.454729	0.338593	-2.8091	-2.8091	-2.8091	-2.8091	-2.8091	-2.8091	-2.8091	-0.857667	-2.8091	-2.8091	-0.912094	-2.8091	-2.8091	-2.8091	-2.8091	-2.8091	-2.8091	-2.8091
rno-piR-10262	-2.8091	-0.640445	-0.483425	0.290504	-0.691621	0.338593	-2.8091	-2.8091	-2.8091	1.32461	-2.8091	-2.8091	-2.8091	-2.8091	-2.8091	-2.8091	0.493989	-0.401497	2.48009	-2.8091	-2.8091	1.96264	-2.8091	-2.8091
rno-piR-10263	-2.8091	-2.8091	-1.62376	-2.8091	-2.8091	-2.8091	-2.8091	-2.8091	-2.8091	-2.8091	-2.8091	-2.8091	-2.8091	-2.8091	-2.8091	-2.8091	-2.8091	-2.8091	-2.8091	-2.8091	-2.8091	-2.8091	-2.8091	-2.8091
rno-piR-10266	-2.8091	-0.246323	-0.0327353	-0.817012	-0.691621	-2.8091	-2.8091	-2.8091	-2.8091	-2.8091	-2.8091	-2.8091	-2.8091	-2.8091	-2.8091	-2.8091	0.493989	0.340829	0.0317522	-2.8091	-2.8091	0.563112	-2.8091	-2.8091
rno-piR-10267	-2.8091	-2.8091	-1.9595	-2.8091	-2.8091	-2.8091	3.50757	-2.8091	-2.8091	2.24363	-2.8091	2.03091	-2.8091	-2.8091	-2.8091	-2.8091	-2.8091	-2.8091	-2.8091	-2.8091	-2.8091	-2.8091	-2.8091	-2.8091
rno-piR-10268	-2.8091	-2.8091	-1.62376	-2.8091	-2.8091	-2.8091	-2.8091	-2.8091	-2.8091	-2.8091	-2.8091	-2.8091	-2.8091	-2.8091	-2.8091	-2.8091	-2.8091	-2.8091	-2.8091	-2.8091	-2.8091	-2.8091	-2.8091	-2.8091
rno-piR-10269	-2.8091	-1.21021	-1.37586	-2.8091	0.454729	0.338593	1.99161	-2.8091	-2.8091	-2.8091	-2.8091	-2.8091	-2.8091	-2.8091	-2.8091	-2.8091	-0.912094	0.340829	0.0317522	2.38485	-2.8091	-2.8091	-2.8091	-2.8091
rno-piR-1027	-2.8091	-2.8091	-0.483425	-2.8091	-0.691621	-0.403412	-2.8091	3.72427	-2.8091	-2.8091	2.86126	2.03091	-2.8091	-0.203124	3.43517	-2.8091	-0.912094	0.823464	0.838007	-2.8091	-2.8091	-2.8091	-2.8091	-2.8091
rno-piR-10270	-2.8091	-2.8091	-1.9595	-2.8091	-0.691621	-2.8091	-2.8091	-2.8091	-2.8091	-2.8091	-2.8091	-2.8091	-2.8091	-2.8091	-2.8091	-2.8091	-2.8091	-2.8091	-2.8091	-2.8091	-2.8091	-2.8091	-2.8091	-2.8091
rno-piR-10272	-2.8091	-2.8091	-2.8091	-2.8091	-2.8091	-2.8091	-2.8091	-2.8091	-2.8091	-2.8091	-2.8091	-2.8091	-2.8091	-2.8091	-2.8091	-2.8091	-0.912094	-2.8091	-2.8091	-2.8091	-2.8091	-2.8091	-2.8091	-2.8091
rno-piR-10273	-2.8091	-1.21021	-0.716865	-0.817012	-2.8091	-2.8091	1.08683	-2.8091	-2.8091	-0.291042	-2.8091	-2.8091	-2.8091	-2.8091	-2.8091	-2.8091	-0.269622	-2.8091	-2.8091	-2.8091	-2.8091	-2.8091	-2.8091	-2.8091
rno-piR-10274	-2.8091	-1.21021	-1.00219	-2.8091	-0.691621	-2.8091	-2.8091	-2.8091	-2.8091	-2.8091	-2.8091	-2.8091	-2.8091	-2.8091	-2.8091	-2.8091	0.163835	-2.8091	-2.8091	-2.8091	-2.8091	-2.8091	-2.8091	-2.8091
rno-piR-10275	-2.8091	-2.8091	-2.8091	-2.8091	-2.8091	-2.8091	-2.8091	-2.8091	-2.8091	-2.8091	-2.8091	-2.8091	-2.8091	-2.8091	-2.8091	-2.8091	-2.8091	-2.8091	0.0317522	-2.8091	-2.8091	-2.8091	-2.8091	-2.8091
rno-piR-10276	-2.8091	-2.8091	-2.8091	-2.8091	-2.8091	-2.8091	-2.8091	-2.8091	-2.8091	-2.8091	-2.8091	-2.8091	-2.8091	-2.8091	-2.8091	-2.8091	-2.8091	-2.8091	0.0317522	-2.8091	-2.8091	-2.8091	-2.8091	-2.8091
rno-piR-10277	-0.497571	-2.8091	-2.8091	-2.8091	-2.8091	-2.8091	-2.8091	-2.8091	-2.8091	-2.8091	-2.8091	-2.8091	-2.8091	0.570591	-2.8091	-2.8091	-2.8091	-2.8091	-2.8091	-2.8091	-2.8091	-2.8091	-2.8091	-2.8091
rno-piR-10278	-0.497571	-2.8091	-1.62376	-2.8091	-0.691621	-2.8091	-2.8091	-2.8091	-2.8091	-0.291042	-2.8091	-2.8091	-2.8091	-2.8091	-2.8091	-2.8091	-2.8091	-2.8091	1.72527	-2.8091	-2.8091	-2.8091	-2.8091	-2.8091
rno-piR-1028	-2.8091	-1.21021	-1.17414	-2.8091	-0.691621	-2.8091	-2.8091	-2.8091	-2.8091	-2.8091	-2.8091	-2.8091	-2.8091	-0.857667	-2.8091	-2.8091	-0.912094	0.340829	-2.8091	3.62793	-2.8091	1.96264	-2.8091	-2.8091
rno-piR-10280	-2.8091	-2.8091	-1.37586	-2.8091	-2.8091	-2.8091	-2.8091	-2.8091	-2.8091	0.960112	-2.8091	-2.8091	-2.8091	-2.8091	-2.8091	-2.8091	-2.8091	-2.8091	-2.8091	-2.8091	-2.8091	-2.8091	-2.8091	-2.8091
rno-piR-10281	-0.497571	-2.8091	-1.00219	-2.8091	-2.8091	-2.8091	-2.8091	-2.8091	-2.8091	-2.8091	-2.8091	-2.8091	-2.8091	-2.8091	-2.8091	-2.8091	-2.8091	-2.8091	-2.8091	-2.8091	-2.8091	-2.8091	-2.8091	-2.8091
rno-piR-10282	-2.8091	-2.8091	-0.716865	-0.817012	-2.8091	-2.8091	-2.8091	-2.8091	-2.8091	-2.8091	-2.8091	-2.8091	-2.8091	-0.857667	-2.8091	-2.8091	-0.912094	-0.401497	-2.8091	-2.8091	-2.8091	-2.8091	-2.8091	-2.8091
rno-piR-10283	-0.497571	-2.8091	-1.62376	-2.8091	-0.691621	-2.8091	-2.8091	-2.8091	-2.8091	-2.8091	-2.8091	-2.8091	-2.8091	-2.8091	-2.8091	-2.8091	-2.8091	-2.8091	-2.8091	-2.8091	-2.8091	-2.8091	-2.8091	-2.8091
rno-piR-10284	-2.8091	-2.8091	-1.9595	-2.8091	-2.8091	-2.8091	-2.8091	-2.8091	-2.8091	-2.8091	-2.8091	-2.8091	-2.8091	-2.8091	-2.8091	-2.8091	-2.8091	-2.8091	-2.8091	-2.8091	-2.8091	-2.8091	-2.8091	-2.8091
rno-piR-10285	-2.8091	-2.8091	-1.00219	-2.8091	-2.8091	-2.8091	-2.8091	-2.8091	-2.8091	-0.291042	-2.8091	6.02217	-2.8091	-2.8091	-2.8091	-2.8091	-0.269622	-0.401497	-2.8091	4.67473	-2.8091	-2.8091	-2.8091	-2.8091
rno-piR-10286	-2.8091	-2.8091	-0.851482	-2.8091	-0.691621	-2.8091	-2.8091	-2.8091	-2.8091	-2.8091	-2.8091	-2.8091	-2.8091	-2.8091	-2.8091	-2.8091	-0.269622	-2.8091	-2.8091	-2.8091	-2.8091	-2.8091	-2.8091	-2.8091
rno-piR-10287	-2.8091	-2.8091	-0.594968	-0.817012	-0.00243066	-2.8091	-2.8091	-2.8091	-2.8091	-2.8091	-2.8091	-2.8091	-2.8091	-0.203124	-2.8091	-2.8091	-0.269622	-0.401497	0.0317522	-2.8091	-2.8091	-2.8091	-2.8091	-2.8091
rno-piR-10289	-2.8091	-1.21021	-1.37586	-2.8091	-2.8091	-2.8091	-2.8091	-2.8091	-2.8091	0.960112	1.01527	-2.8091	-2.8091	-2.8091	-2.8091	-2.8091	-2.8091	-2.8091	0.838007	-2.8091	-2.8091	3.125	-2.8091	-2.8091
rno-piR-1029	-2.8091	-1.21021	-2.8091	-0.817012	-2.8091	-2.8091	-2.8091	-2.8091	-2.8091	-2.8091	-2.8091	-2.8091	-2.8091	-2.8091	-2.8091	-2.8091	-0.912094	-2.8091	-2.8091	-2.8091	-2.8091	-2.8091	-2.8091	-2.8091
rno-piR-10290	-0.497571	-2.8091	-2.8091	-2.8091	-2.8091	-0.403412	-2.8091	-2.8091	-2.8091	-2.8091	-2.8091	-2.8091	-2.8091	-2.8091	-2.8091	-2.8091	-2.8091	-2.8091	-2.8091	-2.8091	-2.8091	-2.8091	-2.8091	-2.8091
rno-piR-10291	-2.8091	-2.8091	-1.62376	-2.8091	-2.8091	-2.8091	-2.8091	-2.8091	-2.8091	-2.8091	-2.8091	-2.8091	-2.8091	-2.8091	-2.8091	-2.8091	-2.8091	-2.8091	0.0317522	-2.8091	-2.8091	-2.8091	-2.8091	-2.8091
rno-piR-10292	-2.8091	-2.8091	-0.594968	-2.8091	-2.8091	-2.8091	-2.8091	-2.8091	-2.8091	0.960112	-2.8091	-2.8091	-2.8091	-0.203124	-2.8091	-2.8091	-0.912094	-0.401497	0.838007	2.22447	-2.8091	2.35186	-2.8091	-2.8091
rno-piR-10293	-2.8091	-2.8091	-1.17414	-0.153685	-0.00243066	-2.8091	-2.8091	-2.8091	-2.8091	-2.8091	-2.8091	-2.8091	-2.8091	-2.8091	-2.8091	-2.8091	-2.8091	-0.401497	0.838007	4.90368	-2.8091	-2.8091	-2.8091	-2.8091
rno-piR-10294	-2.8091	1.2692	1.80246	2.79968	0.79938	2.75521	-2.8091	-2.8091	-2.8091	-2.8091	-2.8091	2.03091	-2.8091	2.17888	-2.8091	0.370133	1.88445	1.47041	0.838007	-2.8091	11.1207	-2.8091	-2.8091	-2.8091
rno-piR-10295	-2.8091	-2.8091	-1.9595	-2.8091	-2.8091	-2.8091	-2.8091	-2.8091	-2.8091	-2.8091	-2.8091	-2.8091	-2.8091	-2.8091	-2.8091	-2.8091	-0.912094	-2.8091	-2.8091	-2.8091	-2.8091	-2.8091	-2.8091	-2.8091
rno-piR-10296	-2.8091	-1.21021	-1.9595	-2.8091	-2.8091	-2.8091	-2.8091	-2.8091	-2.8091	-2.8091	-2.8091	-2.8091	-2.8091	-2.8091	-2.8091	-2.8091	-2.8091	-0.401497	-2.8091	2.04396	-2.8091	-2.8091	-2.8091	-2.8091
rno-piR-10297	-2.8091	-2.8091	-1.62376	-2.8091	-2.8091	-2.8091	-2.8091	-2.8091	-2.8091	-2.8091	-2.8091	-2.8091	-2.8091	-2.8091	-2.8091	-2.8091	-2.8091	-2.8091	0.0317522	-2.8091	-2.8091	-2.8091	-2.8091	-2.8091
rno-piR-10298	-2.8091	-2.8091	-1.9595	-2.8091	-2.8091	-2.8091	-2.8091	-2.8091	-2.8091	-2.8091	-2.8091	-2.8091	-2.8091	-2.8091	-2.8091	-2.8091	-2.8091	-2.8091	-2.8091	-2.8091	-2.8091	-2.8091	-2.8091	-2.8091
rno-piR-10299	-2.8091	-2.8091	-1.9595	-2.8091	-2.8091	-2.8091	-2.8091	-2.8091	-2.8091	-2.8091	-2.8091	-2.8091	-2.8091	-2.8091	-2.8091	-2.8091	-2.8091	-2.8091	-2.8091	-2.8091	-2.8091	-2.8091	-2.8091	-2.8091
rno-piR-103	-2.8091	-2.8091	-1.9595	-2.8091	-2.8091	-2.8091	-2.8091	-2.8091	-2.8091	-2.8091	-2.8091	-2.8091	-2.8091	-2.8091	-2.8091	-2.8091	-2.8091	-2.8091	-2.8091	-2.8091	-2.8091	-2.8091	-2.8091	-2.8091
rno-piR-1030	0.228153	-2.8091	1.00493	-2.8091	-0.691621	0.821078	-2.8091	-2.8091	-2.8091	1.85633	-2.8091	-2.8091	-2.8091	0.570591	-2.8091	-2.8091	0.493989	-0.401497	0.0317522	5.12411	-2.8091	-2.8091	-2.8091	-2.8091
rno-piR-10301	-2.8091	-2.8091	-1.9595	-2.8091	-2.8091	-0.403412	-2.8091	-2.8091	-2.8091	-2.8091	-2.8091	-2.8091	-2.8091	-0.203124	-2.8091	2.12834	-0.912094	-0.401497	-2.8091	-2.8091	-2.8091	-2.8091	-2.8091	-2.8091
rno-piR-10303	-2.8091	-2.8091	-1.9595	-2.8091	-2.8091	-2.8091	-2.8091	-2.8091	-2.8091	-2.8091	-2.8091	-2.8091	-2.8091	-2.8091	-2.8091	-2.8091	-2.8091	-2.8091	-2.8091	-2.8091	-2.8091	-2.8091	-2.8091	-2.8091
rno-piR-10304	0.228153	1.14769	2.26721	2.5869	0.79938	2.25088	4.48953	-2.8091	3.24626	3.28537	-2.8091	3.54872	-2.8091	-0.857667	-2.8091	-2.8091	1.64266	2.39711	2.26962	3.86386	-2.8091	0.563112	-2.8091	-2.8091
rno-piR-10305	-2.8091	0.308753	0.528722	0.627278	-0.691621	-2.8091	3.72484	2.05668	-2.8091	-0.291042	-2.8091	-2.8091	-2.8091	0.570591	-2.8091	-2.8091	0.493989	-0.401497	0.0317522	-2.8091	-2.8091	-2.8091	-2.8091	-2.8091
rno-piR-10306	-2.8091	-1.21021	-1.37586	-2.8091	-0.691621	-2.8091	-2.8091	-2.8091	-2.8091	1.61494	-2.8091	-2.8091	-2.8091	-0.857667	-2.8091	-2.8091	-0.912094	-2.8091	-2.8091	-2.8091	-2.8091	-2.8091	-2.8091	-2.8091
rno-piR-10307	-0.497571	-2.8091	-1.00219	-2.8091	-2.8091	-2.8091	-2.8091	-2.8091	-2.8091	-2.8091	-2.8091	-2.8091	-2.8091	-0.203124	-2.8091	-2.8091	-2.8091	-2.8091	-2.8091	-2.8091	-2.8091	-2.8091	-2.8091	-2.8091
rno-piR-10308	-2.8091	-2.8091	-1.9595	-2.8091	-0.691621	-2.8091	-2.8091	-2.8091	-2.8091	-2.8091	-2.8091	-2.8091	-2.8091	-2.8091	-2.8091	-2.8091	-2.8091	-2.8091	-2.8091	-2.8091	-2.8091	-2.8091	-2.8091	-2.8091
rno-piR-10309	-0.497571	-0.246323	-0.284903	0.627278	1.50838	0.338593	1.08683	1.51844	-2.8091	2.06297	1.01527	2.98098	-2.8091	0.236575	-2.8091	0.370133	-0.269622	-0.401497	2.82654	3.09063	-2.8091	2.35186	-2.8091	-2.8091
rno-piR-1031	-2.8091	-2.8091	-1.9595	-2.8091	-0.691621	-2.8091	-2.8091	-2.8091	-2.8091	-2.8091	-2.8091	-2.8091	-2.8091	-2.8091	-2.8091	-2.8091	-2.8091	-2.8091	-2.8091	-2.8091	-2.8091	-2.8091	-2.8091	-2.8091
rno-piR-10310	0.702996	-2.8091	-1.9595	-2.8091	-2.8091	-0.403412	-2.8091	-2.8091	-2.8091	-2.8091	1.01527	-2.8091	-2.8091	-2.8091	-2.8091	-2.8091	-2.8091	-2.8091	0.0317522	-2.8091	-2.8091	-2.8091	-2.8091	5.05692
rno-piR-10311	-0.497571	-1.21021	-1.00219	-0.153685	-2.8091	0.338593	-2.8091	0.646749	-2.8091	-2.8091	3.83307	2.03091	-2.8091	-2.8091	-2.8091	-2.8091	-2.8091	-2.8091	0.0317522	-2.8091	-2.8091	1.42735	-2.8091	-2.8091
rno-piR-10312	-2.8091	-2.8091	-1.9595	-2.8091	-0.691621	-2.8091	-2.8091	-2.8091	-2.8091	-2.8091	-2.8091	-2.8091	-2.8091	-2.8091	-2.8091	-2.8091	-2.8091	-0.401497	-2.8091	-2.8091	-2.8091	-2.8091	-2.8091	-2.8091
rno-piR-10313	-2.8091	-2.8091	-2.8091	-2.8091	-2.8091	-2.8091	-2.8091	-2.8091	-2.8091	-2.8091	-2.8091	-2.8091	-2.8091	-2.8091	-2.8091	-2.8091	-2.8091	-0.401497	-2.8091	-2.8091	-2.8091	-2.8091	-2.8091	-2.8091
rno-piR-10314	2.1196	1.3812	2.45326	2.14282	1.07661	0.821078	-2.8091	-2.8091	-2.8091	-2.8091	-2.8091	-2.8091	-2.8091	2.79837	-2.8091	-2.8091	1.88445	2.09402	-2.8091	-2.8091	-2.8091	-2.8091	-2.8091	3.34827
rno-piR-10315	-2.8091	-2.8091	-1.9595	-0.817012	0.79938	-2.8091	-2.8091	-2.8091	-2.8091	-2.8091	-2.8091	-2.8091	-2.8091	-0.203124	-2.8091	-2.8091	0.163835	-2.8091	-2.8091	-2.8091	-2.8091	-2.8091	-2.8091	-2.8091
rno-piR-10318	-2.8091	-2.8091	-2.8091	-2.8091	-2.8091	-2.8091	-2.8091	-2.8091	-2.8091	-2.8091	-2.8091	-2.8091	-2.8091	-2.8091	-2.8091	0.370133	-2.8091	-2.8091	-2.8091	-2.8091	-2.8091	-2.8091	-2.8091	-2.8091
rno-piR-10319	0.228153	-2.8091	-1.62376	-2.8091	-2.8091	0.338593	-2.8091	0.646749	-2.8091	-2.8091	-2.8091	-2.8091	-2.8091	-2.8091	-2.8091	-2.8091	-2.8091	-2.8091	-2.8091	-2.8091	-2.8091	-2.8091	-2.8091	-2.8091
rno-piR-1032	-2.8091	-0.246323	0.112934	0.899196	-0.00243066	-0.403412	-2.8091	-2.8091	-2.8091	-2.8091	-2.8091	-2.8091	-2.8091	-0.203124	-2.8091	-2.8091	0.7614	-2.8091	1.34924	4.43945	-2.8091	0.563112	-2.8091	-2.8091
rno-piR-10320	-2.8091	-0.640445	-1.00219	-2.8091	-2.8091	-2.8091	-2.8091	-2.8091	-2.8091	-2.8091	-2.8091	-2.8091	-2.8091	-2.8091	-2.8091	-2.8091	-2.8091	0.823464	1.72527	-2.8091	-2.8091	-2.8091	-2.8091	-2.8091
rno-piR-10321	0.228153	-0.640445	0.0420094	-0.817012	-0.00243066	-2.8091	-2.8091	0.646749	-2.8091	1.61494	-2.8091	-2.8091	-2.8091	-2.8091	-2.8091	-2.8091	-2.8091	-0.401497	1.34924	-2.8091	-2.8091	-2.8091	-2.8091	-2.8091
rno-piR-10324	-0.497571	-2.8091	-0.111754	0.899196	0.454729	-2.8091	-2.8091	-2.8091	-2.8091	-2.8091	-2.8091	-2.8091	-2.8091	0.236575	-2.8091	-2.8091	0.7614	-0.401497	0.0317522	-2.8091	-2.8091	-2.8091	-2.8091	-2.8091
rno-piR-10325	-2.8091	-1.21021	-0.716865	-0.153685	-2.8091	0.338593	-2.8091	-2.8091	-2.8091	-2.8091	-2.8091	-2.8091	-2.8091	-2.8091	-2.8091	-2.8091	-0.269622	-0.401497	-2.8091	-2.8091	-2.8091	-2.8091	-2.8091	-2.8091
rno-piR-10326	0.228153	-0.640445	-1.00219	-2.8091	0.454729	1.70704	1.99161	0.646749	-2.8091	0.469226	-2.8091	5.9351	-2.8091	-0.857667	-2.8091	1.74324	-0.912094	-2.8091	0.0317522	4.0185	-2.8091	-2.8091	-2.8091	-2.8091
rno-piR-10327	0.702996	-0.640445	0.0420094	-0.817012	-0.00243066	0.821078	-2.8091	-2.8091	-2.8091	1.85633	-2.8091	-2.8091	-2.8091	-2.8091	-2.8091	-2.8091	-0.912094	-0.401497	1.72527	1.30646	-2.8091	-2.8091	-2.8091	2.78304
rno-piR-10328	2.26239	0.308753	2.26721	0.899196	1.07661	0.821078	-2.8091	3.57569	-2.8091	2.24363	-2.8091	-2.8091	-2.8091	0.570591	-2.8091	-2.8091	0.493989	1.70961	-2.8091	3.09063	-2.8091	1.42735	3.39198	-2.8091
rno-piR-10329	-2.8091	-2.8091	-2.8091	-2.8091	-2.8091	-2.8091	-2.8091	-2.8091	-2.8091	-2.8091	-2.8091	-2.8091	-2.8091	-0.857667	-2.8091	-2.8091	-2.8091	-2.8091	-2.8091	-2.8091	-2.8091	-2.8091	-2.8091	-2.8091
rno-piR-10333	-0.497571	-1.21021	-2.8091	-2.8091	-2.8091	-2.8091	-2.8091	-2.8091	-2.8091	-2.8091	-2.8091	-2.8091	-2.8091	-2.8091	-2.8091	-2.8091	-2.8091	-2.8091	-2.8091	-2.8091	-2.8091	-2.8091	-2.8091	-2.8091
rno-piR-10334	-2.8091	-1.21021	-1.9595	-2.8091	-2.8091	-2.8091	-2.8091	-2.8091	-2.8091	-2.8091	-2.8091	-2.8091	-2.8091	-2.8091	-2.8091	-2.8091	-0.912094	-2.8091	-2.8091	-2.8091	-2.8091	-2.8091	-2.8091	-2.8091
rno-piR-10335	-2.8091	-2.8091	-1.37586	-0.817012	-2.8091	-2.8091	-2.8091	-2.8091	-2.8091	-2.8091	-2.8091	-2.8091	-2.8091	0.236575	-2.8091	-2.8091	-2.8091	-2.8091	-2.8091	-2.8091	-2.8091	-2.8091	-2.8091	-2.8091
rno-piR-10336	-2.8091	-2.8091	-2.8091	-2.8091	-2.8091	-2.8091	-2.8091	-2.8091	-2.8091	-2.8091	-2.8091	-2.8091	-2.8091	-2.8091	-2.8091	-2.8091	-2.8091	-2.8091	-2.8091	-2.8091	-2.8091	0.563112	-2.8091	-2.8091
rno-piR-10338	-2.8091	-2.8091	-2.8091	-2.8091	-0.691621	-2.8091	-2.8091	-2.8091	-2.8091	-2.8091	-2.8091	-2.8091	-2.8091	-0.857667	-2.8091	-2.8091	-2.8091	-2.8091	-2.8091	-2.8091	-2.8091	-2.8091	-2.8091	-2.8091
rno-piR-10339	-2.8091	-1.21021	-0.716865	-0.817012	-0.691621	-2.8091	-2.8091	-2.8091	-2.8091	-2.8091	-2.8091	-2.8091	-2.8091	-2.8091	-2.8091	-2.8091	-0.269622	-0.401497	-2.8091	-2.8091	-2.8091	-2.8091	-2.8091	-2.8091
rno-piR-1034	-2.8091	-2.8091	-2.8091	-2.8091	-2.8091	-2.8091	-2.8091	-2.8091	-2.8091	-2.8091	-2.8091	-2.8091	-2.8091	-2.8091	-2.8091	-2.8091	-2.8091	-0.401497	-2.8091	-2.8091	-2.8091	-2.8091	-2.8091	-2.8091
rno-piR-10340	-2.8091	-2.8091	-2.8091	-2.8091	-2.8091	-2.8091	-2.8091	-2.8091	-2.8091	-2.8091	-2.8091	-2.8091	-2.8091	-2.8091	-2.8091	-2.8091	-2.8091	-2.8091	-2.8091	-2.8091	-2.8091	0.563112	-2.8091	-2.8091
rno-piR-10341	-2.8091	-2.8091	-2.8091	-2.8091	-0.691621	-2.8091	-2.8091	-2.8091	-2.8091	-2.8091	-2.8091	-2.8091	-2.8091	-2.8091	-2.8091	-2.8091	-2.8091	-2.8091	-2.8091	-2.8091	-2.8091	-2.8091	-2.8091	-2.8091
rno-piR-10344	-2.8091	-2.8091	-2.8091	-2.8091	-2.8091	-2.8091	1.08683	-2.8091	-2.8091	1.61494	-2.8091	-2.8091	-2.8091	-2.8091	-2.8091	-2.8091	-2.8091	-2.8091	0.0317522	-2.8091	-2.8091	-2.8091	-2.8091	-2.8091
rno-piR-10345	-2.8091	-2.8091	-2.8091	-2.8091	-2.8091	-2.8091	1.99161	-2.8091	-2.8091	-2.8091	-2.8091	-2.8091	-2.8091	-2.8091	-2.8091	-2.8091	-2.8091	-2.8091	-2.8091	-2.8091	-2.8091	-2.8091	-2.8091	-2.8091
rno-piR-10346	-2.8091	0.0587823	0.765054	0.627278	0.454729	-0.403412	1.08683	-2.8091	-2.8091	-2.8091	-2.8091	-2.8091	-2.8091	0.840636	-2.8091	-2.8091	0.163835	0.823464	-2.8091	-2.8091	-2.8091	-2.8091	-2.8091	-2.8091
rno-piR-10348	-2.8091	-0.640445	-2.8091	-2.8091	-2.8091	-2.8091	-2.8091	-2.8091	-2.8091	-2.8091	-2.8091	-2.8091	-2.8091	-2.8091	-2.8091	-2.8091	-2.8091	-2.8091	-2.8091	-2.8091	-2.8091	-2.8091	-2.8091	-2.8091
rno-piR-10349	-2.8091	-2.8091	-2.8091	-2.8091	-2.8091	-2.8091	-2.8091	-2.8091	-2.8091	-2.8091	-2.8091	-2.8091	-2.8091	-2.8091	-2.8091	-2.8091	-2.8091	-2.8091	-2.8091	-2.8091	-2.8091	0.563112	-2.8091	-2.8091
rno-piR-1035	-2.8091	-1.21021	-1.37586	-2.8091	-2.8091	-2.8091	-2.8091	-2.8091	-2.8091	-2.8091	1.01527	-2.8091	-2.8091	-2.8091	-2.8091	-2.8091	-2.8091	-2.8091	-2.8091	3.34571	-2.8091	-2.8091	-2.8091	-2.8091
rno-piR-10350	-2.8091	-2.8091	-0.284903	-2.8091	-0.691621	-2.8091	-2.8091	-2.8091	-2.8091	-2.8091	-2.8091	-2.8091	-2.8091	-0.857667	-2.8091	-2.8091	-0.269622	-0.401497	-2.8091	-2.8091	-2.8091	-2.8091	-2.8091	-2.8091
rno-piR-10351	-2.8091	-2.8091	-1.9595	-2.8091	-2.8091	-2.8091	-2.8091	-2.8091	-2.8091	-2.8091	-2.8091	-2.8091	-2.8091	-2.8091	-2.8091	-2.8091	-2.8091	-2.8091	-2.8091	-2.8091	-2.8091	-2.8091	-2.8091	-2.8091
rno-piR-10352	-2.8091	-1.21021	-1.62376	-0.817012	1.07661	-2.8091	-2.8091	-2.8091	-2.8091	-2.8091	1.01527	-2.8091	-2.8091	-2.8091	-2.8091	-2.8091	-2.8091	-2.8091	0.0317522	2.66031	-2.8091	-2.8091	-2.8091	-2.8091
rno-piR-10353	-2.8091	-2.8091	-1.9595	-2.8091	-2.8091	-2.8091	-2.8091	-2.8091	-2.8091	-2.8091	-2.8091	-2.8091	-2.8091	-2.8091	-2.8091	-2.8091	-0.912094	-2.8091	-2.8091	-2.8091	-2.8091	-2.8091	-2.8091	-2.8091
rno-piR-10355	-2.8091	-2.8091	-2.8091	-2.8091	-0.691621	-2.8091	-2.8091	-2.8091	-2.8091	-2.8091	-2.8091	-2.8091	-2.8091	-2.8091	-2.8091	-2.8091	-2.8091	-2.8091	-2.8091	-2.8091	-2.8091	-2.8091	-2.8091	-2.8091
rno-piR-10357	-2.8091	-2.8091	-2.8091	-2.8091	-2.8091	-2.8091	-2.8091	-2.8091	-2.8091	-2.8091	-2.8091	-2.8091	-2.8091	-2.8091	-2.8091	-2.8091	-2.8091	-0.401497	-2.8091	-2.8091	-2.8091	-2.8091	-2.8091	-2.8091
rno-piR-10358	-2.8091	-2.8091	-2.8091	-2.8091	-2.8091	-2.8091	-2.8091	-2.8091	-2.8091	-2.8091	-2.8091	-2.8091	-2.8091	-2.8091	-2.8091	-2.8091	-2.8091	-2.8091	0.0317522	-2.8091	-2.8091	-2.8091	-2.8091	-2.8091
rno-piR-10360	-2.8091	-2.8091	-1.62376	-2.8091	-0.00243066	-0.403412	-2.8091	-2.8091	-2.8091	-2.8091	-2.8091	-2.8091	-2.8091	-2.8091	-2.8091	-2.8091	-2.8091	-0.401497	-2.8091	-2.8091	-2.8091	-2.8091	-2.8091	-2.8091
rno-piR-10361	-2.8091	-2.8091	-2.8091	-2.8091	-2.8091	-2.8091	-2.8091	-2.8091	-2.8091	1.32461	-2.8091	-2.8091	-2.8091	-2.8091	-2.8091	-2.8091	-2.8091	-2.8091	-2.8091	-2.8091	-2.8091	-2.8091	-2.8091	-2.8091
rno-piR-10366	-2.8091	-2.8091	-2.8091	-2.8091	-2.8091	-2.8091	-2.8091	-2.8091	-2.8091	-2.8091	-2.8091	-2.8091	-2.8091	0.236575	-2.8091	-2.8091	-2.8091	-2.8091	-2.8091	-2.8091	-2.8091	-2.8091	-2.8091	-2.8091
rno-piR-10367	-2.8091	-2.8091	-1.17414	-0.817012	-0.691621	0.821078	-2.8091	0.646749	-2.8091	-0.291042	1.9153	-2.8091	-2.8091	-2.8091	-2.8091	-2.8091	0.163835	-2.8091	-2.8091	0.942549	-2.8091	-2.8091	-2.8091	3.09317
rno-piR-10368	-0.497571	-2.8091	-2.8091	-0.153685	-2.8091	-2.8091	-2.8091	-2.8091	-2.8091	-0.291042	1.01527	-2.8091	-2.8091	-2.8091	-2.8091	-2.8091	-2.8091	-2.8091	-2.8091	-2.8091	-2.8091	-2.8091	-2.8091	-2.8091
rno-piR-10371	0.702996	-0.246323	0.476328	-2.8091	-0.00243066	-2.8091	-2.8091	-2.8091	-2.8091	1.61494	-2.8091	-2.8091	-2.8091	-0.857667	-2.8091	-2.8091	0.493989	1.18319	1.72527	2.89147	-2.8091	-2.8091	-2.8091	-2.8091
rno-piR-10372	-0.497571	-2.8091	-2.8091	-2.8091	-2.8091	-2.8091	-2.8091	-2.8091	-2.8091	-2.8091	-2.8091	-2.8091	-2.8091	-2.8091	-2.8091	-2.8091	-2.8091	-2.8091	-2.8091	-2.8091	-2.8091	-2.8091	-2.8091	-2.8091
rno-piR-10374	-2.8091	-2.8091	-0.716865	-2.8091	-2.8091	-2.8091	1.99161	-2.8091	-2.8091	-2.8091	-2.8091	-2.8091	-2.8091	0.236575	-2.8091	-2.8091	-0.269622	-2.8091	0.838007	-2.8091	-2.8091	-2.8091	-2.8091	-2.8091
rno-piR-10375	-0.497571	-1.21021	-1.17414	-2.8091	-2.8091	-2.8091	-2.8091	-2.8091	-2.8091	-2.8091	-2.8091	-2.8091	-2.8091	-2.8091	-2.8091	-2.8091	-0.912094	-2.8091	-2.8091	-2.8091	-2.8091	-2.8091	-2.8091	-2.8091
rno-piR-10376	-0.497571	-0.640445	1.21025	0.290504	0.79938	-2.8091	2.54268	-2.8091	-2.8091	-2.8091	-2.8091	-2.8091	-2.8091	-2.8091	-2.8091	-2.8091	1.50456	-0.401497	-2.8091	-2.8091	-2.8091	-2.8091	-2.8091	-2.8091
rno-piR-10377	0.228153	-2.8091	-0.380507	-0.153685	-0.00243066	-0.403412	-2.8091	-2.8091	-2.8091	-2.8091	-2.8091	-2.8091	-2.8091	-2.8091	-2.8091	-2.8091	0.163835	-0.401497	-2.8091	-0.305325	-2.8091	-2.8091	1.88149	-2.8091
rno-piR-10378	0.702996	0.705286	-0.483425	0.899196	-2.8091	0.338593	-2.8091	-2.8091	-2.8091	1.32461	-2.8091	-2.8091	-2.8091	-0.203124	-2.8091	-2.8091	0.163835	0.340829	0.838007	-2.8091	-2.8091	-2.8091	-2.8091	-2.8091
rno-piR-10379	-2.8091	-2.8091	-1.62376	-2.8091	-2.8091	-2.8091	-2.8091	-2.8091	-2.8091	-2.8091	-2.8091	-2.8091	-2.8091	-2.8091	-2.8091	-2.8091	-2.8091	-2.8091	-2.8091	-2.8091	-2.8091	-2.8091	-2.8091	-2.8091
rno-piR-1038	-2.8091	-2.8091	-1.00219	-2.8091	-0.691621	-2.8091	-2.8091	-2.8091	-2.8091	-2.8091	-2.8091	-2.8091	-2.8091	-2.8091	-2.8091	-2.8091	-2.8091	-0.401497	-2.8091	-2.8091	-2.8091	-2.8091	-2.8091	-2.8091
rno-piR-10380	-2.8091	-2.8091	-1.9595	-2.8091	-0.691621	-2.8091	-2.8091	-2.8091	-2.8091	-2.8091	-2.8091	-2.8091	-2.8091	-2.8091	-2.8091	-2.8091	-2.8091	-2.8091	-2.8091	-2.8091	-2.8091	-2.8091	-2.8091	-2.8091
rno-piR-10381	-2.8091	-1.21021	-1.00219	-0.817012	-2.8091	-2.8091	-2.8091	-2.8091	-2.8091	-2.8091	-2.8091	-2.8091	-2.8091	-2.8091	-2.8091	-2.8091	-2.8091	-2.8091	0.0317522	-2.8091	-2.8091	-2.8091	-2.8091	-2.8091
rno-piR-10383	-0.497571	-2.8091	-0.0327353	-0.153685	-0.691621	-0.403412	-2.8091	-2.8091	-2.8091	0.469226	-2.8091	-2.8091	-2.8091	0.570591	-2.8091	-2.8091	-0.912094	-2.8091	-2.8091	-2.8091	-2.8091	-2.8091	-2.8091	-2.8091
rno-piR-10384	-2.8091	-2.8091	-1.9595	-2.8091	-0.691621	-2.8091	-2.8091	-2.8091	-2.8091	-2.8091	-2.8091	-2.8091	-2.8091	-2.8091	-2.8091	-2.8091	-2.8091	-0.401497	-2.8091	-2.8091	-2.8091	-2.8091	-2.8091	-2.8091
rno-piR-10387	-0.497571	-1.21021	-1.9595	-0.817012	-2.8091	-2.8091	-2.8091	-2.8091	-2.8091	-2.8091	3.83307	-2.8091	-2.8091	-2.8091	-2.8091	-2.8091	-2.8091	-2.8091	0.0317522	-2.8091	-2.8091	-2.8091	-2.8091	-2.8091
rno-piR-10388	-2.8091	-1.21021	-0.594968	-0.153685	-0.00243066	-2.8091	-2.8091	-2.8091	-2.8091	-0.291042	-2.8091	-2.8091	-2.8091	-2.8091	-2.8091	-2.8091	-2.8091	1.47041	-2.8091	-2.8091	-2.8091	-2.8091	-2.8091	-2.8091
rno-piR-10389	-2.8091	-0.640445	-0.195589	-2.8091	-2.8091	-2.8091	-2.8091	-2.8091	-2.8091	-2.8091	3.17201	-2.8091	5.7761	-2.8091	-2.8091	-2.8091	-0.912094	-2.8091	-2.8091	-2.8091	-2.8091	-2.8091	-2.8091	-2.8091
rno-piR-1039	-2.8091	-2.8091	-2.8091	-2.8091	-2.8091	-2.8091	-2.8091	-2.8091	-2.8091	-2.8091	-2.8091	-2.8091	-2.8091	-2.8091	-2.8091	-2.8091	-2.8091	-2.8091	0.0317522	-2.8091	-2.8091	-2.8091	-2.8091	-2.8091
rno-piR-10390	-2.8091	-1.21021	-1.62376	-2.8091	-2.8091	-2.8091	-2.8091	-2.8091	-2.8091	-2.8091	-2.8091	-2.8091	-2.8091	-2.8091	-2.8091	-2.8091	-2.8091	-2.8091	-2.8091	-2.8091	-2.8091	-2.8091	-2.8091	-2.8091
rno-piR-10393	-2.8091	0.705286	1.3324	2.50836	0.79938	-2.8091	-2.8091	-2.8091	-2.8091	2.54854	-2.8091	2.03091	-2.8091	1.06754	-2.8091	-2.8091	1.64266	1.47041	0.838007	1.83752	-2.8091	4.92748	-2.8091	-2.8091
rno-piR-10394	-0.497571	-1.21021	0.244802	0.627278	0.454729	1.18072	1.08683	2.05668	-2.8091	-2.8091	-2.8091	-2.8091	-2.8091	-0.203124	-2.8091	-2.8091	-0.912094	1.70961	0.838007	2.04396	-2.8091	-2.8091	-2.8091	2.78304
rno-piR-10395	-2.8091	-2.8091	-2.8091	-2.8091	-0.691621	-2.8091	-2.8091	-2.8091	-2.8091	-2.8091	-2.8091	-2.8091	-2.8091	-2.8091	-2.8091	-2.8091	-2.8091	-2.8091	-2.8091	-2.8091	-2.8091	-2.8091	-2.8091	-2.8091
rno-piR-10396	-2.8091	-2.8091	-1.9595	-2.8091	-2.8091	-2.8091	-2.8091	-2.8091	-2.8091	-2.8091	-2.8091	-2.8091	-2.8091	-2.8091	-2.8091	0.370133	-2.8091	-2.8091	-2.8091	-2.8091	-2.8091	-2.8091	-2.8091	-2.8091
rno-piR-10398	0.702996	-1.21021	-1.62376	-2.8091	-0.691621	-2.8091	-2.8091	-2.8091	-2.8091	-2.8091	-2.8091	-2.8091	-2.8091	-0.857667	-2.8091	-2.8091	-0.269622	-0.401497	-2.8091	4.32554	-2.8091	-2.8091	-2.8091	-2.8091
rno-piR-1040	-0.497571	-2.8091	-0.195589	-2.8091	-2.8091	-2.8091	-2.8091	-2.8091	-2.8091	-2.8091	-2.8091	-2.8091	-2.8091	-0.857667	-2.8091	-2.8091	-0.912094	-0.401497	-2.8091	-2.8091	-2.8091	-2.8091	-2.8091	3.56495
rno-piR-10401	1.05817	0.0587823	1.80246	2.24327	2.70391	1.70704	2.54268	2.05668	-2.8091	2.80006	4.72652	2.03091	2.78456	1.06754	-2.8091	-2.8091	1.64266	1.47041	1.34924	1.83752	-2.8091	1.96264	4.78252	4.82462
rno-piR-10402	1.34239	-1.21021	1.49808	2.03484	1.07661	0.338593	5.48038	2.44751	-2.8091	2.06297	-2.8091	6.93174	-2.8091	0.840636	-2.8091	-2.8091	-2.8091	-2.8091	3.22725	6.04812	-2.8091	3.4772	4.592	-2.8091
rno-piR-10403	-2.8091	-2.8091	-1.9595	-2.8091	-2.8091	-2.8091	-2.8091	-2.8091	-2.8091	-0.291042	-2.8091	-2.8091	-2.8091	-2.8091	-2.8091	-2.8091	-2.8091	-2.8091	-2.8091	-2.8091	-2.8091	-2.8091	-2.8091	-2.8091
rno-piR-10404	-0.497571	-1.21021	0.306354	0.290504	-0.691621	-0.403412	-2.8091	-2.8091	-2.8091	-2.8091	4.40845	-2.8091	-2.8091	-2.8091	-2.8091	-2.8091	-0.912094	-0.401497	1.34924	0.45269	-2.8091	-2.8091	-2.8091	-2.8091
rno-piR-10405	-2.8091	-2.8091	-2.8091	-0.817012	-2.8091	-2.8091	-2.8091	-2.8091	-2.8091	-2.8091	5.61978	-2.8091	-2.8091	-0.203124	-2.8091	-2.8091	-2.8091	-2.8091	-2.8091	-2.8091	-2.8091	-2.8091	-2.8091	-2.8091
rno-piR-10406	-2.8091	-2.8091	-2.8091	-2.8091	-0.691621	-2.8091	-2.8091	-2.8091	-2.8091	-2.8091	-2.8091	-2.8091	-2.8091	-2.8091	-2.8091	-2.8091	-2.8091	-0.401497	-2.8091	-2.8091	-2.8091	-2.8091	-2.8091	-2.8091
rno-piR-10407	-2.8091	-0.640445	-0.594968	-2.8091	0.79938	-0.403412	-2.8091	-2.8091	-2.8091	-2.8091	-2.8091	-2.8091	-2.8091	-2.8091	-2.8091	-2.8091	0.163835	-0.401497	0.838007	-2.8091	-2.8091	-2.8091	-2.8091	-2.8091
rno-piR-10409	-2.8091	-2.8091	-1.37586	-0.817012	-2.8091	-2.8091	-2.8091	-2.8091	-2.8091	-2.8091	-2.8091	-2.8091	-2.8091	-2.8091	-2.8091	-2.8091	-2.8091	-0.401497	-2.8091	-2.8091	-2.8091	-2.8091	2.82617	-2.8091
rno-piR-1041	-2.8091	-0.246323	0.180423	0.290504	-2.8091	-2.8091	-2.8091	0.646749	-2.8091	-2.8091	-2.8091	-2.8091	-2.8091	-0.857667	-2.8091	-2.8091	-2.8091	-2.8091	-2.8091	1.30646	-2.8091	-2.8091	-2.8091	-2.8091
rno-piR-10412	-2.8091	-2.8091	-1.62376	-2.8091	-2.8091	-2.8091	-2.8091	-2.8091	-2.8091	-2.8091	-2.8091	-2.8091	-2.8091	-2.8091	-2.8091	-2.8091	-2.8091	-2.8091	-2.8091	-2.8091	-2.8091	4.19945	-2.8091	-2.8091
rno-piR-10413	-2.8091	-2.8091	-2.8091	-2.8091	-0.691621	-2.8091	-2.8091	-2.8091	-2.8091	-2.8091	-2.8091	-2.8091	-2.8091	-2.8091	-2.8091	0.370133	-2.8091	-2.8091	-2.8091	-2.8091	-2.8091	-2.8091	-2.8091	-2.8091
rno-piR-10415	-0.497571	-1.21021	-2.8091	-2.8091	-2.8091	-2.8091	-2.8091	-2.8091	-2.8091	-2.8091	-2.8091	-2.8091	-2.8091	-2.8091	-2.8091	-2.8091	-2.8091	-2.8091	-2.8091	-2.8091	-2.8091	-2.8091	-2.8091	-2.8091
rno-piR-10417	-0.497571	-2.8091	-0.284903	-0.817012	-2.8091	-0.403412	-2.8091	-2.8091	-2.8091	-0.291042	-2.8091	-2.8091	-2.8091	-2.8091	-2.8091	-2.8091	0.163835	-0.401497	-2.8091	-2.8091	-2.8091	-2.8091	-2.8091	-2.8091
rno-piR-10418	-2.8091	-2.8091	-2.8091	-2.8091	-0.691621	-2.8091	-2.8091	-2.8091	-2.8091	-2.8091	-2.8091	-2.8091	-2.8091	-2.8091	-2.8091	-2.8091	-2.8091	-2.8091	-2.8091	-2.8091	-2.8091	-2.8091	-2.8091	-2.8091
rno-piR-10419	-2.8091	-2.8091	-1.9595	-2.8091	-2.8091	-2.8091	-2.8091	-2.8091	-2.8091	-2.8091	-2.8091	-2.8091	-2.8091	-2.8091	-2.8091	-2.8091	-2.8091	-2.8091	-2.8091	-2.8091	-2.8091	-2.8091	-2.8091	-2.8091
rno-piR-10420	-2.8091	-2.8091	-1.62376	-2.8091	0.454729	-0.403412	-2.8091	-2.8091	-2.8091	-2.8091	-2.8091	-2.8091	-2.8091	-2.8091	-2.8091	-2.8091	-2.8091	-2.8091	-2.8091	-2.8091	-2.8091	-2.8091	-2.8091	-2.8091
rno-piR-10421	-2.8091	-2.8091	-1.37586	-2.8091	-2.8091	-2.8091	-2.8091	-2.8091	-2.8091	-2.8091	-2.8091	-2.8091	-2.8091	-2.8091	-2.8091	-2.8091	-2.8091	-2.8091	-2.8091	-2.8091	-2.8091	-2.8091	-2.8091	-2.8091
rno-piR-10422	-2.8091	-1.21021	-0.483425	-0.817012	-0.691621	-2.8091	-2.8091	-2.8091	-2.8091	-2.8091	-2.8091	-2.8091	-2.8091	-0.857667	-2.8091	-2.8091	-2.8091	-2.8091	-2.8091	-2.8091	-2.8091	-2.8091	-2.8091	-2.8091
rno-piR-10423	-2.8091	-2.8091	-2.8091	-2.8091	-2.8091	-2.8091	-2.8091	1.51844	-2.8091	-2.8091	-2.8091	-2.8091	-2.8091	-2.8091	-2.8091	-2.8091	-2.8091	-2.8091	-2.8091	1.83752	-2.8091	-2.8091	-2.8091	-2.8091
rno-piR-10424	-2.8091	-2.8091	-1.9595	-2.8091	-2.8091	-2.8091	-2.8091	-2.8091	-2.8091	-2.8091	-2.8091	-2.8091	-2.8091	-2.8091	-2.8091	-2.8091	-2.8091	-2.8091	-2.8091	-2.8091	-2.8091	-2.8091	-2.8091	-2.8091
rno-piR-10426	-0.497571	-1.21021	-0.716865	-2.8091	-0.691621	0.338593	-2.8091	-2.8091	-2.8091	0.469226	-2.8091	-2.8091	-2.8091	-2.8091	-2.8091	-2.8091	-0.912094	-2.8091	-2.8091	-2.8091	-2.8091	1.42735	-2.8091	-2.8091
rno-piR-10427	-2.8091	-1.21021	-2.8091	-2.8091	-2.8091	-2.8091	-2.8091	-2.8091	-2.8091	-2.8091	-2.8091	-2.8091	-2.8091	-2.8091	-2.8091	-2.8091	-2.8091	-2.8091	-2.8091	-2.8091	-2.8091	-2.8091	-2.8091	-2.8091
rno-piR-10428	-2.8091	-1.21021	-2.8091	-2.8091	-2.8091	-2.8091	-2.8091	-2.8091	-2.8091	-2.8091	-2.8091	-2.8091	-2.8091	-2.8091	-2.8091	-2.8091	-2.8091	-2.8091	-2.8091	0.45269	-2.8091	-2.8091	-2.8091	-2.8091
rno-piR-10431	-2.8091	-1.21021	-1.00219	0.290504	-0.00243066	-2.8091	-2.8091	-2.8091	-2.8091	-2.8091	-2.8091	-2.8091	-2.8091	-2.8091	-2.8091	-2.8091	-2.8091	0.823464	0.0317522	-2.8091	-2.8091	-2.8091	-2.8091	-2.8091
rno-piR-10434	-2.8091	-2.8091	-2.8091	-2.8091	-0.00243066	-2.8091	-2.8091	-2.8091	-2.8091	-2.8091	-2.8091	-2.8091	-2.8091	-2.8091	-2.8091	-2.8091	-2.8091	-2.8091	-2.8091	3.49372	-2.8091	-2.8091	-2.8091	5.58914
rno-piR-10435	-2.8091	-2.8091	-1.62376	-2.8091	-2.8091	-2.8091	-2.8091	-2.8091	-2.8091	-2.8091	-2.8091	-2.8091	-2.8091	-2.8091	-2.8091	-2.8091	-2.8091	-2.8091	-2.8091	-2.8091	-2.8091	-2.8091	-2.8091	-2.8091
rno-piR-10437	-2.8091	-1.21021	-0.851482	-2.8091	-0.691621	-2.8091	-2.8091	-2.8091	-2.8091	-0.291042	-2.8091	-2.8091	-2.8091	-0.857667	-2.8091	2.68242	0.163835	-2.8091	-2.8091	-2.8091	-2.8091	-2.8091	-2.8091	-2.8091
rno-piR-10438	-2.8091	0.0587823	-0.380507	-0.153685	0.79938	0.821078	1.99161	-2.8091	-2.8091	-0.291042	3.17201	-2.8091	-2.8091	0.236575	-2.8091	-2.8091	-0.269622	0.340829	-2.8091	1.83752	-2.8091	-2.8091	1.88149	-2.8091
rno-piR-10439	0.702996	-1.21021	-0.195589	0.290504	-0.00243066	-0.403412	-2.8091	2.75461	-2.8091	3.28537	-2.8091	-2.8091	-2.8091	-0.857667	-2.8091	-2.8091	-2.8091	-2.8091	0.838007	4.70542	-2.8091	4.37741	-2.8091	-2.8091
rno-piR-1044	0.228153	2.35894	3.3669	3.24923	2.10903	0.338593	1.08683	-2.8091	-2.8091	-2.8091	-2.8091	-2.8091	-2.8091	1.97107	-2.8091	-2.8091	3.22998	3.04622	0.838007	-2.8091	-2.8091	3.62555	-2.8091	-2.8091
rno-piR-10440	1.05817	-0.640445	1.14503	-0.153685	1.07661	0.821078	-2.8091	2.44751	-2.8091	2.24363	-2.8091	-2.8091	-2.8091	-0.203124	-2.8091	0.370133	0.163835	1.91462	1.34924	3.75072	-2.8091	1.42735	-2.8091	-2.8091
rno-piR-10441	0.228153	-0.640445	0.112934	-2.8091	0.454729	-2.8091	-2.8091	-2.8091	4.8023	-0.291042	-2.8091	-2.8091	-2.8091	-0.857667	-2.8091	-2.8091	0.986392	-0.401497	0.0317522	-2.8091	-2.8091	2.91032	-2.8091	-2.8091
rno-piR-10442	-2.8091	-2.8091	-1.9595	-0.817012	-2.8091	0.821078	-2.8091	-2.8091	-2.8091	-2.8091	-2.8091	-2.8091	-2.8091	-2.8091	-2.8091	-2.8091	-2.8091	-2.8091	-2.8091	-2.8091	-2.8091	-2.8091	-2.8091	-2.8091
rno-piR-10443	-2.8091	-2.8091	-1.62376	-2.8091	-2.8091	-2.8091	-2.8091	-2.8091	-2.8091	-2.8091	-2.8091	-2.8091	-2.8091	-2.8091	-2.8091	-2.8091	-2.8091	-2.8091	-2.8091	-2.8091	-2.8091	-2.8091	-2.8091	-2.8091
rno-piR-10445	-0.497571	-1.21021	0.112934	0.627278	-2.8091	-2.8091	2.54268	-2.8091	-2.8091	-2.8091	-2.8091	-2.8091	-2.8091	-0.857667	-2.8091	-2.8091	-2.8091	-2.8091	-2.8091	-2.8091	-2.8091	-2.8091	-2.8091	3.34827
rno-piR-10446	1.34239	2.35894	3.201	3.0419	1.30869	2.25088	-2.8091	-2.8091	-2.8091	2.24363	-2.8091	-2.8091	-2.8091	2.59598	-2.8091	-2.8091	2.64468	3.28638	0.838007	-2.8091	-2.8091	-2.8091	-2.8091	-2.8091
rno-piR-10447	-2.8091	-2.8091	-0.851482	-2.8091	-2.8091	-2.8091	-2.8091	-2.8091	-2.8091	-2.8091	-2.8091	-2.8091	-2.8091	-2.8091	-2.8091	-2.8091	-2.8091	-2.8091	-2.8091	-2.8091	-2.8091	-2.8091	-2.8091	-2.8091
rno-piR-10449	2.26239	0.705286	3.11029	0.290504	4.13074	2.85785	-2.8091	-2.8091	-2.8091	0.469226	6.05815	-2.8091	-2.8091	3.48604	-2.8091	-2.8091	2.35485	3.04622	3.94674	3.18077	-2.8091	-2.8091	-2.8091	-2.8091
rno-piR-1045	-2.8091	-2.8091	-1.9595	-2.8091	-2.8091	-0.403412	-2.8091	-2.8091	-2.8091	-2.8091	-2.8091	-2.8091	-2.8091	-2.8091	-2.8091	-2.8091	-2.8091	-2.8091	-2.8091	-2.8091	-2.8091	-2.8091	-2.8091	-2.8091
rno-piR-10450	-2.8091	-2.8091	-1.9595	-2.8091	-2.8091	-2.8091	-2.8091	-2.8091	2.2881	-2.8091	-2.8091	-2.8091	-2.8091	-2.8091	-2.8091	0.370133	-2.8091	-2.8091	-2.8091	-2.8091	-2.8091	-2.8091	-2.8091	-2.8091
rno-piR-10451	-2.8091	-1.21021	-0.716865	-2.8091	-0.691621	-0.403412	-2.8091	-2.8091	-2.8091	0.960112	-2.8091	2.03091	-2.8091	-0.203124	-2.8091	2.89581	-2.8091	-2.8091	1.34924	-2.8091	-2.8091	-2.8091	-2.8091	3.75329
rno-piR-10453	1.7829	0.705286	1.62289	2.24327	1.07661	0.338593	2.94032	-2.8091	-2.8091	0.469226	-2.8091	-2.8091	-2.8091	-0.203124	-2.8091	-2.8091	0.7614	2.64738	0.0317522	0.942549	-2.8091	-2.8091	-2.8091	-2.8091
rno-piR-10454	-2.8091	-2.8091	-1.00219	-2.8091	-0.691621	-2.8091	-2.8091	-2.8091	-2.8091	-2.8091	-2.8091	-2.8091	-2.8091	-0.857667	-2.8091	-2.8091	-2.8091	-0.401497	-2.8091	-2.8091	-2.8091	-2.8091	-2.8091	-2.8091
rno-piR-10455	1.96108	0.308753	1.14503	0.627278	1.68365	1.46788	-2.8091	-2.8091	-2.8091	3.58226	-2.8091	-2.8091	-2.8091	0.236575	-2.8091	-2.8091	0.493989	1.47041	2.26962	-0.305325	-2.8091	3.125	-2.8091	0.944813
rno-piR-10456	-2.8091	-1.21021	-1.62376	-0.817012	-2.8091	-2.8091	-2.8091	-2.8091	-2.8091	-2.8091	-2.8091	-2.8091	-2.8091	-2.8091	-2.8091	-2.8091	-2.8091	-2.8091	-2.8091	-2.8091	-2.8091	0.563112	-2.8091	-2.8091
rno-piR-10457	-2.8091	-2.8091	-0.483425	-2.8091	-0.00243066	0.821078	-2.8091	-2.8091	-2.8091	-2.8091	-2.8091	-2.8091	-2.8091	-0.203124	-2.8091	0.370133	-0.269622	0.823464	0.838007	-2.8091	-2.8091	-2.8091	-2.8091	-2.8091
rno-piR-10458	-2.8091	-2.8091	-1.00219	-2.8091	-2.8091	-2.8091	-2.8091	-2.8091	-2.8091	-2.8091	-2.8091	-2.8091	-2.8091	-2.8091	-2.8091	-2.8091	-2.8091	-0.401497	-2.8091	-2.8091	-2.8091	-2.8091	-2.8091	-2.8091
rno-piR-10459	0.228153	-2.8091	-1.62376	-2.8091	-0.691621	0.821078	1.99161	-2.8091	-2.8091	-2.8091	-2.8091	-2.8091	-2.8091	-0.857667	-2.8091	-2.8091	-2.8091	-2.8091	-2.8091	-2.8091	-2.8091	-2.8091	-2.8091	-2.8091
rno-piR-10461	-2.8091	-2.8091	-2.8091	1.12746	-2.8091	1.46788	-2.8091	-2.8091	-2.8091	-2.8091	-2.8091	-2.8091	-2.8091	-2.8091	-2.8091	-2.8091	-2.8091	-2.8091	1.34924	-2.8091	-2.8091	-2.8091	-2.8091	-2.8091
rno-piR-10462	-2.8091	-2.8091	-2.8091	-2.8091	-2.8091	0.338593	-2.8091	-2.8091	-2.8091	-2.8091	-2.8091	-2.8091	-2.8091	-2.8091	-2.8091	-2.8091	-2.8091	-2.8091	-2.8091	-2.8091	-2.8091	-2.8091	-2.8091	-2.8091
rno-piR-10463	0.702996	-2.8091	-0.0327353	-2.8091	0.79938	-0.403412	-2.8091	-2.8091	-2.8091	-2.8091	-2.8091	-2.8091	-2.8091	-2.8091	-2.8091	1.21556	-0.912094	-2.8091	-2.8091	-2.8091	-2.8091	-2.8091	-2.8091	-2.8091
rno-piR-10464	1.34239	-0.640445	-0.0327353	-0.817012	-0.691621	-2.8091	-2.8091	-2.8091	-2.8091	-2.8091	-2.8091	-2.8091	-2.8091	-0.203124	-2.8091	-2.8091	0.163835	0.823464	0.0317522	-2.8091	-2.8091	-2.8091	-2.8091	-2.8091
rno-piR-10465	0.228153	-2.8091	-1.62376	-0.153685	-0.691621	-0.403412	-2.8091	0.646749	-2.8091	3.01414	5.20752	6.25568	-2.8091	-2.8091	5.98831	-2.8091	-2.8091	-2.8091	0.838007	-2.8091	-2.8091	3.62555	-2.8091	-2.8091
rno-piR-10467	-2.8091	-2.8091	-2.8091	-2.8091	-0.691621	-2.8091	-2.8091	-2.8091	-2.8091	-2.8091	-2.8091	-2.8091	-2.8091	-2.8091	-2.8091	-2.8091	-2.8091	-2.8091	-2.8091	-2.8091	-2.8091	-2.8091	-2.8091	-2.8091
rno-piR-10468	-2.8091	-2.8091	-2.8091	-2.8091	-2.8091	-0.403412	-2.8091	-2.8091	-2.8091	-2.8091	-2.8091	-2.8091	-2.8091	-2.8091	-2.8091	-2.8091	-2.8091	-2.8091	-2.8091	-2.8091	-2.8091	-2.8091	-2.8091	-2.8091
rno-piR-10469	-2.8091	-1.21021	-0.594968	-2.8091	-0.691621	-2.8091	-2.8091	-2.8091	-2.8091	-2.8091	-2.8091	-2.8091	-2.8091	-2.8091	-2.8091	-2.8091	-0.912094	0.340829	-2.8091	-2.8091	-2.8091	-2.8091	-2.8091	-2.8091
rno-piR-10470	-2.8091	-2.8091	-1.00219	-2.8091	-0.691621	-0.403412	-2.8091	-2.8091	-2.8091	-2.8091	-2.8091	-2.8091	-2.8091	-2.8091	-2.8091	-2.8091	-0.912094	-2.8091	-2.8091	-2.8091	-2.8091	-2.8091	2.82617	-2.8091
rno-piR-10472	4.16185	1.6727	2.53165	2.5869	2.6203	2.39445	5.0684	3.57569	-2.8091	5.43171	5.45728	5.84244	-2.8091	2.07872	-2.8091	2.43186	1.35176	1.18319	4.31912	5.82876	-2.8091	4.92748	2.82617	3.09317
rno-piR-10473	-2.8091	-2.8091	-2.8091	-2.8091	-2.8091	-2.8091	-2.8091	-2.8091	-2.8091	-2.8091	-2.8091	2.03091	-2.8091	-2.8091	-2.8091	-2.8091	-2.8091	-2.8091	-2.8091	-2.8091	-2.8091	-2.8091	-2.8091	-2.8091
rno-piR-10474	-2.8091	-1.21021	-1.9595	-2.8091	-2.8091	-0.403412	-2.8091	-2.8091	-2.8091	-2.8091	-2.8091	-2.8091	-2.8091	-0.203124	-2.8091	-2.8091	-0.912094	-0.401497	-2.8091	-2.8091	-2.8091	-2.8091	-2.8091	-2.8091
rno-piR-10475	-2.8091	-2.8091	-2.8091	-2.8091	-2.8091	-2.8091	-2.8091	-2.8091	-2.8091	-2.8091	3.6445	-2.8091	-2.8091	-2.8091	-2.8091	-2.8091	-2.8091	-2.8091	-2.8091	-2.8091	-2.8091	-2.8091	-2.8091	-2.8091
rno-piR-10476	-2.8091	-2.8091	-2.8091	-2.8091	-2.8091	-2.8091	-2.8091	-2.8091	-2.8091	-2.8091	-2.8091	-2.8091	-2.8091	-2.8091	-2.8091	0.370133	-2.8091	-2.8091	-2.8091	-2.8091	-2.8091	-2.8091	-2.8091	-2.8091
rno-piR-10477	1.57947	1.0149	1.0767	1.12746	1.07661	-2.8091	-2.8091	2.05668	-2.8091	0.469226	-2.8091	-2.8091	-2.8091	-0.203124	-2.8091	-2.8091	-0.269622	1.18319	2.48009	2.66031	-2.8091	2.65797	-2.8091	2.78304
rno-piR-10478	-2.8091	-2.8091	-1.17414	-2.8091	-2.8091	-2.8091	-2.8091	-2.8091	-2.8091	-2.8091	2.46457	6.25568	-2.8091	-2.8091	-2.8091	0.370133	-2.8091	-2.8091	0.838007	-2.8091	-2.8091	-2.8091	-2.8091	-2.8091
rno-piR-10479	-0.497571	-1.21021	-0.716865	-2.8091	-0.691621	-0.403412	1.08683	0.646749	-2.8091	0.469226	-2.8091	3.95503	-2.8091	-2.8091	-2.8091	-2.8091	-0.912094	-2.8091	-2.8091	-2.8091	-2.8091	-2.8091	-2.8091	-2.8091
rno-piR-10480	-2.8091	-2.8091	-2.8091	-2.8091	-0.691621	-2.8091	-2.8091	-2.8091	-2.8091	-2.8091	-2.8091	-2.8091	-2.8091	-0.203124	-2.8091	-2.8091	-2.8091	-2.8091	0.0317522	-2.8091	-2.8091	-2.8091	-2.8091	-2.8091
rno-piR-10481	-2.8091	-2.8091	-1.37586	-0.817012	-2.8091	-2.8091	-2.8091	-2.8091	-2.8091	-0.291042	-2.8091	-2.8091	-2.8091	-2.8091	-2.8091	-2.8091	-2.8091	-2.8091	0.0317522	-2.8091	-2.8091	-2.8091	-2.8091	-2.8091
rno-piR-10482	-2.8091	-2.8091	-1.9595	-2.8091	-2.8091	-2.8091	-2.8091	-2.8091	-2.8091	-2.8091	-2.8091	-2.8091	-2.8091	-2.8091	-2.8091	-2.8091	-2.8091	-2.8091	-2.8091	-2.8091	-2.8091	-2.8091	-2.8091	-2.8091
rno-piR-10483	-2.8091	-2.8091	-2.8091	-2.8091	-2.8091	-0.403412	-2.8091	-2.8091	-2.8091	-2.8091	-2.8091	-2.8091	-2.8091	-2.8091	-2.8091	-2.8091	-2.8091	-2.8091	-2.8091	-2.8091	-2.8091	-2.8091	-2.8091	-2.8091
rno-piR-10484	-2.8091	-2.8091	-1.9595	-2.8091	-2.8091	-2.8091	-2.8091	-2.8091	-2.8091	-2.8091	-2.8091	-2.8091	-2.8091	-2.8091	-2.8091	-2.8091	-2.8091	-2.8091	-2.8091	-2.8091	-2.8091	-2.8091	-2.8091	-2.8091
rno-piR-10486	-2.8091	-2.8091	-2.8091	-2.8091	-2.8091	-2.8091	-2.8091	-2.8091	-2.8091	-2.8091	-2.8091	-2.8091	-2.8091	-2.8091	-2.8091	-2.8091	-2.8091	-2.8091	0.0317522	-2.8091	-2.8091	-2.8091	-2.8091	-2.8091
rno-piR-10487	-2.8091	-1.21021	-0.380507	-2.8091	-0.00243066	-2.8091	-2.8091	-2.8091	-2.8091	-2.8091	-2.8091	-2.8091	-2.8091	-0.857667	-2.8091	-2.8091	-2.8091	-2.8091	-2.8091	-2.8091	-2.8091	-2.8091	-2.8091	-2.8091
rno-piR-10489	-0.497571	-0.640445	-1.17414	-2.8091	-2.8091	-2.8091	-2.8091	-2.8091	-2.8091	-2.8091	-2.8091	-2.8091	-2.8091	-2.8091	-2.8091	-2.8091	-2.8091	-2.8091	-2.8091	-2.8091	-2.8091	1.96264	-2.8091	-2.8091
rno-piR-10490	-0.497571	-2.8091	-2.8091	-2.8091	-2.8091	-0.403412	-2.8091	-2.8091	-2.8091	-2.8091	-2.8091	-2.8091	-2.8091	-2.8091	-2.8091	-2.8091	-2.8091	-2.8091	-2.8091	-2.8091	-2.8091	-2.8091	-2.8091	-2.8091
rno-piR-10491	-2.8091	-2.8091	-1.9595	-2.8091	-2.8091	-0.403412	-2.8091	-2.8091	-2.8091	-2.8091	-2.8091	-2.8091	-2.8091	-2.8091	3.43517	-2.8091	-2.8091	-2.8091	0.838007	-2.8091	-2.8091	-2.8091	-2.8091	-2.8091
rno-piR-10493	2.72371	2.24541	3.51567	3.59143	3.49617	3.28365	4.70932	3.00764	-2.8091	3.11033	4.52245	5.39758	-2.8091	3.59873	-2.8091	3.86829	3.04349	3.28638	4.56957	5.72775	-2.8091	5.40906	4.37244	3.34827
rno-piR-10494	-2.8091	-2.8091	-0.851482	-2.8091	-2.8091	-2.8091	-2.8091	-2.8091	-2.8091	-2.8091	-2.8091	-2.8091	-2.8091	-2.8091	-2.8091	-2.8091	-2.8091	-2.8091	-2.8091	-2.8091	-2.8091	-2.8091	-2.8091	-2.8091
rno-piR-10497	-2.8091	-2.8091	-2.8091	-2.8091	-2.8091	-2.8091	1.08683	-2.8091	-2.8091	-2.8091	1.01527	-2.8091	-2.8091	-2.8091	-2.8091	-2.8091	-2.8091	-2.8091	-2.8091	4.15816	-2.8091	-2.8091	-2.8091	-2.8091
rno-piR-105	-2.8091	-0.246323	0.890033	-2.8091	1.50838	-2.8091	-2.8091	-2.8091	-2.8091	-2.8091	-2.8091	-2.8091	-2.8091	-0.203124	-2.8091	0.370133	-0.269622	0.340829	-2.8091	-2.8091	-2.8091	-2.8091	-2.8091	-2.8091
rno-piR-10500	-2.8091	-2.8091	-1.62376	-2.8091	-2.8091	-2.8091	-2.8091	-2.8091	2.2881	-2.8091	-2.8091	-2.8091	-2.8091	-2.8091	-2.8091	-2.8091	-2.8091	-0.401497	-2.8091	-2.8091	-2.8091	-2.8091	-2.8091	-2.8091
rno-piR-10502	-2.8091	-2.8091	-1.9595	-2.8091	-2.8091	-2.8091	-2.8091	-2.8091	-2.8091	-2.8091	-2.8091	-2.8091	-2.8091	-2.8091	-2.8091	-2.8091	-2.8091	-2.8091	-2.8091	-2.8091	-2.8091	-2.8091	-2.8091	-2.8091
rno-piR-10504	-2.8091	-2.8091	-1.9595	-2.8091	-2.8091	-2.8091	-2.8091	-2.8091	-2.8091	-2.8091	-2.8091	-2.8091	-2.8091	-2.8091	-2.8091	-2.8091	-2.8091	-2.8091	0.838007	-2.8091	-2.8091	-2.8091	-2.8091	-2.8091
rno-piR-10507	-2.8091	-2.8091	-1.62376	-2.8091	-2.8091	-2.8091	-2.8091	-2.8091	-2.8091	-2.8091	-2.8091	-2.8091	-2.8091	-2.8091	-2.8091	-2.8091	-0.912094	-2.8091	-2.8091	-2.8091	-2.8091	-2.8091	-2.8091	-2.8091
rno-piR-10508	0.228153	-1.21021	-1.00219	-0.817012	-0.00243066	-2.8091	-2.8091	-2.8091	-2.8091	0.960112	-2.8091	-2.8091	-2.8091	-2.8091	-2.8091	-2.8091	-2.8091	0.340829	0.838007	2.38485	-2.8091	2.65797	3.39198	-2.8091
rno-piR-10509	0.228153	-2.8091	-1.9595	-2.8091	-0.691621	0.338593	-2.8091	0.646749	-2.8091	0.960112	-2.8091	-2.8091	-2.8091	-2.8091	-2.8091	-2.8091	-2.8091	-2.8091	-2.8091	2.66031	-2.8091	0.563112	2.82617	-2.8091
rno-piR-1051	-2.8091	-2.8091	-1.9595	-2.8091	-2.8091	-0.403412	-2.8091	-2.8091	-2.8091	-2.8091	-2.8091	-2.8091	-2.8091	-0.203124	-2.8091	-2.8091	-2.8091	-2.8091	-2.8091	-2.8091	-2.8091	-2.8091	-2.8091	-2.8091
rno-piR-10512	-2.8091	-2.8091	-2.8091	-2.8091	-2.8091	-0.403412	-2.8091	-2.8091	-2.8091	-2.8091	-2.8091	-2.8091	-2.8091	-2.8091	-2.8091	-2.8091	-2.8091	-2.8091	-2.8091	-2.8091	-2.8091	-2.8091	-2.8091	-2.8091
rno-piR-10513	0.228153	-2.8091	-1.62376	-2.8091	-0.691621	-0.403412	-2.8091	-2.8091	-2.8091	0.469226	-2.8091	-2.8091	-2.8091	-0.857667	-2.8091	-2.8091	-0.912094	-0.401497	-2.8091	-2.8091	-2.8091	-2.8091	-2.8091	-2.8091
rno-piR-10514	-2.8091	-2.8091	-2.8091	-2.8091	-0.691621	-2.8091	-2.8091	-2.8091	-2.8091	-2.8091	1.9153	-2.8091	-2.8091	-2.8091	-2.8091	-2.8091	-2.8091	-2.8091	-2.8091	-2.8091	-2.8091	-2.8091	-2.8091	-2.8091
rno-piR-10517	-0.497571	-2.8091	-1.17414	-2.8091	-2.8091	0.338593	-2.8091	-2.8091	-2.8091	-2.8091	-2.8091	-2.8091	-2.8091	-2.8091	-2.8091	-2.8091	-0.912094	-0.401497	-2.8091	-2.8091	-2.8091	-2.8091	-2.8091	-2.8091
rno-piR-10519	-2.8091	-1.21021	-0.380507	0.627278	0.454729	-2.8091	-2.8091	-2.8091	-2.8091	0.960112	-2.8091	-2.8091	-2.8091	-2.8091	-2.8091	-2.8091	-2.8091	-2.8091	-2.8091	-2.8091	-2.8091	-2.8091	-2.8091	-2.8091
rno-piR-1052	-2.8091	-2.8091	-1.62376	-2.8091	-2.8091	-2.8091	-2.8091	-2.8091	-2.8091	-2.8091	-2.8091	-2.8091	-2.8091	-2.8091	-2.8091	-2.8091	-2.8091	-2.8091	-2.8091	-2.8091	-2.8091	-2.8091	-2.8091	-2.8091
rno-piR-10520	-2.8091	-2.8091	-1.00219	-2.8091	-0.691621	-2.8091	-2.8091	-2.8091	-2.8091	-2.8091	-2.8091	-2.8091	-2.8091	-2.8091	-2.8091	-2.8091	-2.8091	-2.8091	0.0317522	-2.8091	-2.8091	-2.8091	-2.8091	-2.8091
rno-piR-10522	-2.8091	-2.8091	-1.9595	-2.8091	-2.8091	-2.8091	1.08683	-2.8091	3.24626	-2.8091	4.62809	-2.8091	-2.8091	-2.8091	-2.8091	-2.8091	-2.8091	-2.8091	-2.8091	-2.8091	-2.8091	-2.8091	-2.8091	-2.8091
rno-piR-10523	-2.8091	-2.8091	-1.9595	-2.8091	-2.8091	-2.8091	-2.8091	-2.8091	-2.8091	-2.8091	-2.8091	-2.8091	-2.8091	0.236575	-2.8091	-2.8091	-2.8091	-2.8091	-2.8091	-2.8091	-2.8091	-2.8091	-2.8091	-2.8091
rno-piR-10524	-2.8091	-0.640445	-0.380507	-0.153685	-0.691621	-2.8091	2.94032	2.05668	-2.8091	1.32461	1.9153	-2.8091	-2.8091	-2.8091	-2.8091	-2.8091	-2.8091	-0.401497	0.838007	2.38485	-2.8091	1.42735	-2.8091	-2.8091
rno-piR-10526	-2.8091	-2.8091	-0.195589	-0.817012	-0.691621	-0.403412	-2.8091	-2.8091	-2.8091	-2.8091	-2.8091	-2.8091	-2.8091	-2.8091	-2.8091	-2.8091	-2.8091	-0.401497	0.0317522	-2.8091	-2.8091	-2.8091	-2.8091	-2.8091
rno-piR-10528	-0.497571	-2.8091	-0.716865	-2.8091	-0.691621	-2.8091	-2.8091	-2.8091	-2.8091	-2.8091	-2.8091	-2.8091	-2.8091	0.236575	-2.8091	-2.8091	-2.8091	-2.8091	0.0317522	-2.8091	-2.8091	-2.8091	-2.8091	-2.8091
rno-piR-1053	-2.8091	-0.640445	-0.594968	-0.817012	-0.00243066	-2.8091	-2.8091	-2.8091	-2.8091	-2.8091	-2.8091	-2.8091	-2.8091	-0.857667	-2.8091	-2.8091	-0.912094	-2.8091	0.0317522	-2.8091	-2.8091	5.03752	-2.8091	-2.8091
rno-piR-10530	-2.8091	-2.8091	-2.8091	-2.8091	-2.8091	-2.8091	-2.8091	-2.8091	-2.8091	-2.8091	-2.8091	-2.8091	-2.8091	-2.8091	-2.8091	-2.8091	-2.8091	-0.401497	-2.8091	0.942549	-2.8091	-2.8091	-2.8091	-2.8091
rno-piR-10532	-2.8091	-2.8091	-0.380507	-2.8091	0.454729	1.18072	-2.8091	-2.8091	-2.8091	1.32461	-2.8091	-2.8091	-2.8091	-0.857667	-2.8091	-2.8091	-0.912094	0.340829	1.34924	-2.8091	-2.8091	-2.8091	-2.8091	-2.8091
rno-piR-10533	-2.8091	-0.246323	-0.851482	-0.817012	-2.8091	-0.403412	-2.8091	-2.8091	-2.8091	0.469226	3.83307	-2.8091	-2.8091	-2.8091	-2.8091	3.65054	-0.912094	0.340829	0.0317522	-2.8091	-2.8091	-2.8091	-2.8091	-2.8091
rno-piR-10534	-2.8091	-2.8091	-0.284903	-2.8091	-0.691621	-2.8091	-2.8091	-2.8091	-2.8091	-2.8091	-2.8091	-2.8091	-2.8091	-0.203124	-2.8091	-2.8091	0.163835	-0.401497	-2.8091	-2.8091	-2.8091	-2.8091	-2.8091	-2.8091
rno-piR-10538	-2.8091	-2.8091	-0.483425	-2.8091	-2.8091	-2.8091	-2.8091	-2.8091	-2.8091	-2.8091	-2.8091	-2.8091	-2.8091	-2.8091	-2.8091	-2.8091	-0.269622	-0.401497	-2.8091	-2.8091	-2.8091	-2.8091	-2.8091	-2.8091
rno-piR-1054	-2.8091	-2.8091	-1.62376	-2.8091	-2.8091	-2.8091	-2.8091	-2.8091	-2.8091	-2.8091	-2.8091	-2.8091	-2.8091	-2.8091	-2.8091	-2.8091	-2.8091	-2.8091	-2.8091	-2.8091	-2.8091	-2.8091	-2.8091	-2.8091
rno-piR-10541	-0.497571	-1.21021	-1.37586	-2.8091	-2.8091	-0.403412	-2.8091	-2.8091	-2.8091	-2.8091	-2.8091	-2.8091	-2.8091	-0.857667	-2.8091	-2.8091	-0.912094	-2.8091	-2.8091	-2.8091	-2.8091	-2.8091	-2.8091	4.90628
rno-piR-10542	-2.8091	-2.8091	-1.9595	-2.8091	-2.8091	-2.8091	-2.8091	-2.8091	-2.8091	-2.8091	-2.8091	-2.8091	-2.8091	-2.8091	-2.8091	-2.8091	-0.912094	-2.8091	-2.8091	-2.8091	-2.8091	-2.8091	-2.8091	-2.8091
rno-piR-10544	-2.8091	-2.8091	-1.62376	-2.8091	-2.8091	-2.8091	-2.8091	-2.8091	-2.8091	-2.8091	-2.8091	-2.8091	-2.8091	-0.857667	-2.8091	-2.8091	-2.8091	-2.8091	-2.8091	-2.8091	-2.8091	-2.8091	-2.8091	-2.8091
rno-piR-10545	-2.8091	-0.640445	-1.17414	1.12746	0.454729	-0.403412	-2.8091	-2.8091	-2.8091	-2.8091	-2.8091	-2.8091	-2.8091	-2.8091	-2.8091	-2.8091	-0.269622	-2.8091	-2.8091	-2.8091	-2.8091	-2.8091	-2.8091	-2.8091
rno-piR-10546	0.228153	-0.246323	-0.284903	-2.8091	-0.691621	-0.403412	-2.8091	-2.8091	-2.8091	-2.8091	-2.8091	-2.8091	-2.8091	-0.857667	-2.8091	-2.8091	-0.269622	-2.8091	0.0317522	-2.8091	-2.8091	-2.8091	-2.8091	-2.8091
rno-piR-10548	-2.8091	-2.8091	-0.594968	-0.817012	1.68365	-0.403412	1.99161	-2.8091	-2.8091	-2.8091	1.9153	-2.8091	-2.8091	-2.8091	-2.8091	-2.8091	-2.8091	-0.401497	0.838007	-2.8091	-2.8091	-2.8091	1.88149	-2.8091
rno-piR-10549	-2.8091	-1.21021	-1.62376	-0.817012	-0.691621	0.821078	-2.8091	1.51844	-2.8091	1.32461	-2.8091	-2.8091	-2.8091	-2.8091	-2.8091	-2.8091	-2.8091	-0.401497	0.838007	-2.8091	-2.8091	-2.8091	-2.8091	-2.8091
rno-piR-1055	-2.8091	-0.246323	-1.17414	-2.8091	-0.00243066	-0.403412	3.91363	0.646749	-2.8091	0.469226	-2.8091	-2.8091	-2.8091	-0.857667	-2.8091	-2.8091	-2.8091	-2.8091	1.34924	-2.8091	-2.8091	-2.8091	-2.8091	-2.8091
rno-piR-10550	-2.8091	-1.21021	-0.594968	-0.817012	-0.00243066	0.338593	-2.8091	-2.8091	-2.8091	-2.8091	-2.8091	-2.8091	-2.8091	-0.203124	-2.8091	-2.8091	-0.912094	-2.8091	-2.8091	-2.8091	-2.8091	-2.8091	-2.8091	-2.8091
rno-piR-10551	-0.497571	-2.8091	-1.9595	-2.8091	-2.8091	-2.8091	-2.8091	-2.8091	-2.8091	-2.8091	-2.8091	-2.8091	-2.8091	-2.8091	-2.8091	-2.8091	-2.8091	-2.8091	-2.8091	-2.8091	-2.8091	-2.8091	-2.8091	-2.8091
rno-piR-10553	-2.8091	-2.8091	-1.62376	-2.8091	-2.8091	-2.8091	-2.8091	-2.8091	-2.8091	-2.8091	-2.8091	-2.8091	-2.8091	-2.8091	-2.8091	-2.8091	-2.8091	-2.8091	-2.8091	-2.8091	-2.8091	-2.8091	-2.8091	-2.8091
rno-piR-10555	-2.8091	-2.8091	-1.37586	-2.8091	-2.8091	-2.8091	-2.8091	-2.8091	-2.8091	-2.8091	-2.8091	-2.8091	-2.8091	-2.8091	-2.8091	-2.8091	-2.8091	-2.8091	-2.8091	-2.8091	-2.8091	-2.8091	-2.8091	-2.8091
rno-piR-10556	-2.8091	-2.8091	-2.8091	-2.8091	-2.8091	-2.8091	3.25166	-2.8091	-2.8091	-2.8091	-2.8091	-2.8091	-2.8091	-2.8091	-2.8091	-2.8091	-2.8091	-2.8091	-2.8091	-2.8091	-2.8091	-2.8091	-2.8091	-2.8091
rno-piR-10557	-2.8091	-0.640445	-2.8091	-2.8091	-2.8091	-2.8091	-2.8091	-2.8091	-2.8091	-2.8091	2.86126	-2.8091	-2.8091	-2.8091	-2.8091	-2.8091	-2.8091	-2.8091	-2.8091	-2.8091	-2.8091	2.91032	-2.8091	-2.8091
rno-piR-10558	-2.8091	-2.8091	-1.17414	-2.8091	-2.8091	-2.8091	-2.8091	-2.8091	-2.8091	-2.8091	-2.8091	-2.8091	-2.8091	-2.8091	-2.8091	-2.8091	-2.8091	-2.8091	0.0317522	-2.8091	-2.8091	-2.8091	-2.8091	-2.8091
rno-piR-10559	-0.497571	-2.8091	-1.17414	-2.8091	-2.8091	0.338593	-2.8091	-2.8091	-2.8091	-2.8091	-2.8091	-2.8091	-2.8091	-2.8091	-2.8091	-2.8091	-2.8091	0.340829	-2.8091	-2.8091	-2.8091	-2.8091	-2.8091	-2.8091
rno-piR-1056	-2.8091	-1.21021	-2.8091	-2.8091	-2.8091	-2.8091	-2.8091	-2.8091	-2.8091	-2.8091	-2.8091	-2.8091	-2.8091	-2.8091	-2.8091	-2.8091	-0.912094	-2.8091	0.0317522	-2.8091	-2.8091	-2.8091	-2.8091	-2.8091
rno-piR-10560	-2.8091	-2.8091	-1.62376	-2.8091	-2.8091	-2.8091	-2.8091	-2.8091	-2.8091	-2.8091	-2.8091	-2.8091	-2.8091	-2.8091	-2.8091	-2.8091	0.163835	-2.8091	-2.8091	-2.8091	-2.8091	-2.8091	-2.8091	-2.8091
rno-piR-10561	-2.8091	-1.21021	-2.8091	-2.8091	-2.8091	-2.8091	-2.8091	-2.8091	-2.8091	-2.8091	-2.8091	-2.8091	-2.8091	-2.8091	-2.8091	-2.8091	-2.8091	-2.8091	-2.8091	-2.8091	-2.8091	-2.8091	-2.8091	-2.8091
rno-piR-10563	0.702996	-2.8091	0.306354	-0.817012	-0.691621	0.338593	-2.8091	-2.8091	-2.8091	-2.8091	-2.8091	2.03091	-2.8091	0.236575	-2.8091	-2.8091	-2.8091	-2.8091	-2.8091	-2.8091	-2.8091	-2.8091	4.11334	-2.8091
rno-piR-10564	-2.8091	-2.8091	-2.8091	-2.8091	-0.691621	-0.403412	-2.8091	-2.8091	-2.8091	-2.8091	-2.8091	-2.8091	-2.8091	-2.8091	-2.8091	-2.8091	-2.8091	0.340829	-2.8091	-2.8091	-2.8091	-2.8091	-2.8091	-2.8091
rno-piR-10566	-2.8091	-2.8091	-1.62376	-2.8091	-0.00243066	-2.8091	-2.8091	-2.8091	-2.8091	-2.8091	-2.8091	-2.8091	-2.8091	-2.8091	-2.8091	-2.8091	-0.912094	-2.8091	-2.8091	-2.8091	-2.8091	-2.8091	-2.8091	-2.8091
rno-piR-10567	-2.8091	-1.21021	-0.0327353	-2.8091	-0.00243066	0.338593	-2.8091	-2.8091	-2.8091	1.32461	-2.8091	6.25568	-2.8091	0.236575	-2.8091	-2.8091	0.493989	-0.401497	0.0317522	3.42161	-2.8091	0.563112	-2.8091	-2.8091
rno-piR-10568	-2.8091	-2.8091	-1.37586	-2.8091	-2.8091	-2.8091	-2.8091	-2.8091	-2.8091	-2.8091	-2.8091	-2.8091	-2.8091	-2.8091	-2.8091	-2.8091	-2.8091	-2.8091	-2.8091	-2.8091	-2.8091	-2.8091	-2.8091	-2.8091
rno-piR-10571	1.96108	-2.8091	-1.62376	-2.8091	-2.8091	-2.8091	-2.8091	-2.8091	-2.8091	1.32461	-2.8091	2.03091	-2.8091	-0.857667	-2.8091	-2.8091	-2.8091	-2.8091	-2.8091	-2.8091	-2.8091	3.99642	-2.8091	-2.8091
rno-piR-10572	-2.8091	-2.8091	-1.9595	-2.8091	-2.8091	-2.8091	1.08683	-2.8091	-2.8091	-2.8091	-2.8091	-2.8091	-2.8091	-2.8091	-2.8091	-2.8091	-2.8091	-2.8091	-2.8091	-2.8091	-2.8091	-2.8091	-2.8091	0.944813
rno-piR-10574	0.702996	-1.21021	-2.8091	-0.817012	-2.8091	-0.403412	-2.8091	0.646749	-2.8091	0.469226	-2.8091	-2.8091	-2.8091	0.840636	-2.8091	-2.8091	-2.8091	0.340829	-2.8091	-2.8091	-2.8091	-2.8091	-2.8091	-2.8091
rno-piR-10576	-2.8091	-2.8091	-1.62376	-2.8091	-2.8091	-2.8091	-2.8091	-2.8091	-2.8091	-2.8091	-2.8091	-2.8091	-2.8091	-0.203124	-2.8091	-2.8091	-0.912094	-2.8091	-2.8091	-2.8091	-2.8091	-2.8091	-2.8091	-2.8091
rno-piR-10578	-2.8091	-2.8091	0.112934	-2.8091	-0.691621	-0.403412	-2.8091	-2.8091	-2.8091	-2.8091	-2.8091	-2.8091	-2.8091	-0.857667	-2.8091	-2.8091	-0.912094	-0.401497	0.0317522	-2.8091	-2.8091	-2.8091	-2.8091	-2.8091
rno-piR-1058	-2.8091	-2.8091	-1.37586	-2.8091	-2.8091	-2.8091	-2.8091	-2.8091	-2.8091	-2.8091	-2.8091	-2.8091	-2.8091	-2.8091	-2.8091	-2.8091	-2.8091	-2.8091	-2.8091	-2.8091	-2.8091	-2.8091	-2.8091	-2.8091
rno-piR-10580	-2.8091	-2.8091	-1.62376	-2.8091	-0.691621	-2.8091	-2.8091	-2.8091	-2.8091	-2.8091	-2.8091	-2.8091	-2.8091	-2.8091	-2.8091	-2.8091	-2.8091	-2.8091	0.0317522	-2.8091	-2.8091	-2.8091	-2.8091	-2.8091
rno-piR-10581	-2.8091	-2.8091	-0.716865	-0.817012	-2.8091	-2.8091	-2.8091	-2.8091	-2.8091	-2.8091	-2.8091	-2.8091	-2.8091	-2.8091	-2.8091	-2.8091	-2.8091	-2.8091	-2.8091	-2.8091	-2.8091	-2.8091	-2.8091	-2.8091
rno-piR-10583	-2.8091	-2.8091	-1.00219	-2.8091	-0.691621	-2.8091	-2.8091	-2.8091	-2.8091	-2.8091	-2.8091	-2.8091	-2.8091	-2.8091	-2.8091	-2.8091	-0.912094	-0.401497	-2.8091	-2.8091	-2.8091	-2.8091	-2.8091	-2.8091
rno-piR-10584	-2.8091	-2.8091	-1.00219	-0.817012	-0.691621	-2.8091	-2.8091	-2.8091	-2.8091	-2.8091	-2.8091	-2.8091	-2.8091	-0.203124	-2.8091	-2.8091	-2.8091	0.340829	0.0317522	-2.8091	-2.8091	-2.8091	-2.8091	-2.8091
rno-piR-10585	-2.8091	-2.8091	-1.9595	-2.8091	-2.8091	-2.8091	-2.8091	-2.8091	-2.8091	-2.8091	-2.8091	-2.8091	-2.8091	-2.8091	-2.8091	-2.8091	-2.8091	-2.8091	-2.8091	-2.8091	-2.8091	-2.8091	-2.8091	-2.8091
rno-piR-10588	3.47556	2.78165	3.61498	5.15362	4.35412	4.43845	5.21918	-2.8091	-2.8091	4.45954	-2.8091	4.94179	-2.8091	3.63441	6.72269	0.370133	3.18557	3.55475	4.89723	6.76086	-2.8091	5.70424	-2.8091	5.48668
rno-piR-10589	-2.8091	-2.8091	-1.9595	-2.8091	-2.8091	-2.8091	-2.8091	-2.8091	-2.8091	-2.8091	-2.8091	-2.8091	-2.8091	-2.8091	-2.8091	-2.8091	-2.8091	-0.401497	-2.8091	-2.8091	-2.8091	-2.8091	-2.8091	-2.8091
rno-piR-1059	-2.8091	-2.8091	-2.8091	-2.8091	-0.00243066	-2.8091	-2.8091	-2.8091	-2.8091	-2.8091	-2.8091	-2.8091	-2.8091	-2.8091	-2.8091	-2.8091	-0.912094	-2.8091	-2.8091	-2.8091	-2.8091	-2.8091	-2.8091	-2.8091
rno-piR-10590	-2.8091	-2.8091	-1.9595	-2.8091	-2.8091	-2.8091	-2.8091	-2.8091	-2.8091	-2.8091	-2.8091	-2.8091	-2.8091	-2.8091	-2.8091	-2.8091	-2.8091	-2.8091	-2.8091	-2.8091	-2.8091	-2.8091	-2.8091	-2.8091
rno-piR-10591	-2.8091	-2.8091	-1.9595	-2.8091	-2.8091	-2.8091	-2.8091	-2.8091	-2.8091	-2.8091	-2.8091	-2.8091	-2.8091	-2.8091	-2.8091	-2.8091	-2.8091	-2.8091	-2.8091	-0.305325	-2.8091	-2.8091	-2.8091	-2.8091
rno-piR-10593	-2.8091	-1.21021	-1.00219	-2.8091	0.79938	-0.403412	-2.8091	-2.8091	-2.8091	-2.8091	-2.8091	-2.8091	-2.8091	-0.857667	-2.8091	-2.8091	0.493989	-2.8091	0.0317522	-2.8091	-2.8091	0.563112	-2.8091	-2.8091
rno-piR-10594	-2.8091	-2.8091	-1.00219	-2.8091	-2.8091	-2.8091	-2.8091	1.51844	-2.8091	-2.8091	-2.8091	-2.8091	-2.8091	-2.8091	-2.8091	-2.8091	-2.8091	-2.8091	0.0317522	-2.8091	-2.8091	-2.8091	-2.8091	-2.8091
rno-piR-10596	-2.8091	-1.21021	-1.00219	-2.8091	-2.8091	-2.8091	-2.8091	-2.8091	-2.8091	-0.291042	-2.8091	-2.8091	-2.8091	-0.857667	-2.8091	-2.8091	-2.8091	-2.8091	0.0317522	-2.8091	-2.8091	2.35186	-2.8091	-2.8091
rno-piR-10597	-2.8091	-2.8091	-1.37586	-2.8091	-2.8091	-2.8091	-2.8091	-2.8091	-2.8091	-2.8091	-2.8091	-2.8091	-2.8091	-2.8091	-2.8091	-2.8091	-2.8091	-2.8091	0.0317522	-2.8091	-2.8091	-2.8091	-2.8091	-2.8091
rno-piR-10598	-0.497571	0.308753	1.57426	3.24923	1.30869	1.46788	1.99161	2.44751	-2.8091	2.54854	4.28467	4.94179	-2.8091	2.44331	3.43517	3.39396	2.18467	0.340829	2.48009	4.73546	-2.8091	5.23521	-2.8091	-2.8091
rno-piR-106	-2.8091	-2.8091	-1.9595	-2.8091	-2.8091	0.338593	4.6036	-2.8091	-2.8091	-2.8091	-2.8091	-2.8091	-2.8091	-2.8091	-2.8091	-2.8091	-0.912094	-2.8091	-2.8091	-2.8091	-2.8091	-2.8091	-2.8091	-2.8091
rno-piR-1060	0.228153	0.0587823	0.92937	0.290504	-0.691621	0.821078	-2.8091	-2.8091	-2.8091	0.960112	-2.8091	-2.8091	-2.8091	0.570591	-2.8091	-2.8091	-0.269622	-0.401497	0.0317522	-2.8091	-2.8091	-2.8091	-2.8091	-2.8091
rno-piR-10600	0.228153	-2.8091	-0.716865	-0.153685	0.454729	-0.403412	-2.8091	-2.8091	-2.8091	0.960112	-2.8091	-2.8091	-2.8091	-0.203124	-2.8091	-2.8091	0.163835	-2.8091	0.0317522	-2.8091	-2.8091	-2.8091	-2.8091	-2.8091
rno-piR-10602	-2.8091	-2.8091	-1.9595	-2.8091	-0.691621	-2.8091	-2.8091	-2.8091	-2.8091	-2.8091	-2.8091	-2.8091	-2.8091	-2.8091	-2.8091	-2.8091	-2.8091	-0.401497	-2.8091	-2.8091	-2.8091	-2.8091	-2.8091	-2.8091
rno-piR-10603	-2.8091	-2.8091	-1.62376	-2.8091	-2.8091	-2.8091	-2.8091	-2.8091	-2.8091	-2.8091	-2.8091	-2.8091	-2.8091	-2.8091	-2.8091	-2.8091	-2.8091	-2.8091	-2.8091	-2.8091	-2.8091	-2.8091	-2.8091	-2.8091
rno-piR-10604	-2.8091	-2.8091	-1.37586	-2.8091	-2.8091	-2.8091	-2.8091	-2.8091	-2.8091	-2.8091	-2.8091	-2.8091	-2.8091	-0.857667	-2.8091	-2.8091	-0.912094	-2.8091	-2.8091	-2.8091	-2.8091	-2.8091	-2.8091	-2.8091
rno-piR-10605	-2.8091	-2.8091	-2.8091	-2.8091	-2.8091	-2.8091	-2.8091	-2.8091	4.22465	-2.8091	-2.8091	-2.8091	-2.8091	-2.8091	-2.8091	-2.8091	-2.8091	-2.8091	-2.8091	-2.8091	-2.8091	-2.8091	-2.8091	-2.8091
rno-piR-10606	-0.497571	-0.640445	-0.851482	-2.8091	-0.691621	-2.8091	-2.8091	-2.8091	-2.8091	-2.8091	-2.8091	-2.8091	-2.8091	-2.8091	-2.8091	-2.8091	-2.8091	0.340829	0.0317522	-2.8091	-2.8091	-2.8091	-2.8091	-2.8091
rno-piR-10608	-2.8091	-2.8091	-1.62376	-2.8091	-2.8091	-2.8091	-2.8091	-2.8091	-2.8091	-2.8091	-2.8091	-2.8091	-2.8091	-2.8091	-2.8091	-2.8091	-0.269622	-2.8091	0.838007	-2.8091	-2.8091	-2.8091	-2.8091	-2.8091
rno-piR-10609	-2.8091	-2.8091	-1.9595	-2.8091	-0.691621	-2.8091	-2.8091	-2.8091	-2.8091	-2.8091	-2.8091	-2.8091	-2.8091	-2.8091	-2.8091	-2.8091	-2.8091	-2.8091	-2.8091	-2.8091	-2.8091	-2.8091	-2.8091	-2.8091
rno-piR-1061	-2.8091	-2.8091	-1.00219	-2.8091	-2.8091	0.338593	-2.8091	-2.8091	-2.8091	-2.8091	-2.8091	-2.8091	-2.8091	-2.8091	-2.8091	-2.8091	-2.8091	-2.8091	-2.8091	-2.8091	-2.8091	-2.8091	-2.8091	-2.8091
rno-piR-10611	-2.8091	-2.8091	-0.851482	-2.8091	-0.00243066	-2.8091	-2.8091	-2.8091	-2.8091	-2.8091	-2.8091	-2.8091	-2.8091	-0.203124	-2.8091	-2.8091	-2.8091	1.18319	0.838007	4.61133	-2.8091	-2.8091	-2.8091	-2.8091
rno-piR-10613	-0.497571	-2.8091	-1.37586	-2.8091	-2.8091	-2.8091	-2.8091	0.646749	2.2881	-2.8091	-2.8091	-2.8091	-2.8091	-0.857667	3.43517	-2.8091	-2.8091	-2.8091	-2.8091	-2.8091	-2.8091	-2.8091	-2.8091	-2.8091
rno-piR-10616	-2.8091	-1.21021	-2.8091	-2.8091	-2.8091	-2.8091	-2.8091	-2.8091	-2.8091	1.32461	-2.8091	-2.8091	-2.8091	-2.8091	-2.8091	-2.8091	-2.8091	-2.8091	0.0317522	-2.8091	-2.8091	-2.8091	-2.8091	-2.8091
rno-piR-10617	-2.8091	-2.8091	-1.37586	-2.8091	-2.8091	-2.8091	-2.8091	-2.8091	-2.8091	-2.8091	-2.8091	-2.8091	-2.8091	-2.8091	-2.8091	-2.8091	-2.8091	-2.8091	-2.8091	-2.8091	-2.8091	-2.8091	-2.8091	-2.8091
rno-piR-10618	-2.8091	-2.8091	-1.9595	-2.8091	-0.691621	0.338593	-2.8091	-2.8091	-2.8091	-2.8091	-2.8091	-2.8091	-2.8091	-2.8091	-2.8091	-2.8091	-2.8091	-2.8091	-2.8091	-2.8091	-2.8091	3.125	-2.8091	-2.8091
rno-piR-10619	-2.8091	-2.8091	-2.8091	-2.8091	-2.8091	-2.8091	-2.8091	-2.8091	-2.8091	-2.8091	-2.8091	-2.8091	-2.8091	-2.8091	-2.8091	-2.8091	-2.8091	-0.401497	-2.8091	-2.8091	-2.8091	-2.8091	-2.8091	-2.8091
rno-piR-1062	-2.8091	-2.8091	-1.00219	-0.817012	-0.00243066	-2.8091	-2.8091	-2.8091	-2.8091	-2.8091	-2.8091	-2.8091	-2.8091	-2.8091	-2.8091	-2.8091	-2.8091	-0.401497	-2.8091	-2.8091	-2.8091	-2.8091	-2.8091	-2.8091
rno-piR-10620	1.34239	-1.21021	0.244802	3.0419	0.79938	-2.8091	-2.8091	-2.8091	-2.8091	3.01414	-2.8091	2.03091	-2.8091	-0.857667	-2.8091	-2.8091	0.7614	1.91462	0.0317522	-2.8091	-2.8091	3.4772	-2.8091	5.97706
rno-piR-10621	-2.8091	-2.8091	-2.8091	-2.8091	-2.8091	-2.8091	-2.8091	-2.8091	3.24626	-0.291042	-2.8091	-2.8091	-2.8091	-0.857667	-2.8091	-2.8091	-2.8091	-0.401497	-2.8091	-2.8091	-2.8091	-2.8091	-2.8091	-2.8091
rno-piR-10623	-0.497571	0.0587823	-0.851482	-0.817012	-0.691621	-0.403412	-2.8091	-2.8091	-2.8091	-2.8091	-2.8091	-2.8091	-2.8091	-2.8091	-2.8091	-2.8091	-2.8091	-0.401497	-2.8091	-2.8091	-2.8091	-2.8091	-2.8091	-2.8091
rno-piR-10624	-2.8091	-2.8091	-1.37586	-0.817012	-0.691621	-2.8091	-2.8091	-2.8091	-2.8091	-2.8091	-2.8091	-2.8091	-2.8091	-2.8091	-2.8091	-2.8091	-2.8091	-2.8091	-2.8091	-2.8091	-2.8091	-2.8091	-2.8091	-2.8091
rno-piR-10625	-2.8091	-1.21021	0.628027	0.290504	-0.691621	-2.8091	1.08683	-2.8091	-2.8091	-2.8091	1.01527	-2.8091	-2.8091	-0.203124	-2.8091	-2.8091	0.163835	-2.8091	0.0317522	-2.8091	-2.8091	-2.8091	-2.8091	-2.8091
rno-piR-10626	-0.497571	-2.8091	-1.00219	-0.817012	-2.8091	-0.403412	-2.8091	-2.8091	-2.8091	-2.8091	-2.8091	-2.8091	-2.8091	-0.857667	-2.8091	-2.8091	-0.269622	-2.8091	-2.8091	-2.8091	-2.8091	-2.8091	-2.8091	-2.8091
rno-piR-10627	-2.8091	-1.21021	-1.37586	-2.8091	-2.8091	-2.8091	-2.8091	-2.8091	-2.8091	-2.8091	-2.8091	-2.8091	-2.8091	-2.8091	-2.8091	-2.8091	-2.8091	-0.401497	-2.8091	-2.8091	-2.8091	-2.8091	-2.8091	-2.8091
rno-piR-10628	-2.8091	-1.21021	-1.17414	-0.153685	-2.8091	-0.403412	-2.8091	-2.8091	-2.8091	-2.8091	-2.8091	-2.8091	-2.8091	-0.857667	-2.8091	-2.8091	-0.912094	-2.8091	0.838007	-2.8091	-2.8091	-2.8091	-2.8091	-2.8091
rno-piR-10629	0.228153	-2.8091	-2.8091	-2.8091	-2.8091	-2.8091	-2.8091	-2.8091	-2.8091	-2.8091	-2.8091	-2.8091	-2.8091	-2.8091	-2.8091	-2.8091	-2.8091	-2.8091	-2.8091	-2.8091	-2.8091	0.563112	-2.8091	-2.8091
rno-piR-1063	-2.8091	-1.21021	-1.9595	-0.817012	-2.8091	-2.8091	-2.8091	-2.8091	-2.8091	-2.8091	-2.8091	-2.8091	-2.8091	-2.8091	-2.8091	-2.8091	-2.8091	-2.8091	-2.8091	-2.8091	-2.8091	-2.8091	-2.8091	-2.8091
rno-piR-10630	-2.8091	-1.21021	-1.17414	-0.817012	-2.8091	-2.8091	-2.8091	3.57569	-2.8091	-2.8091	-2.8091	-2.8091	-2.8091	-0.203124	-2.8091	-2.8091	-2.8091	-0.401497	-2.8091	-2.8091	-2.8091	-2.8091	-2.8091	-2.8091
rno-piR-10633	-2.8091	-2.8091	-2.8091	-2.8091	-2.8091	-2.8091	-2.8091	0.646749	-2.8091	-2.8091	-2.8091	-2.8091	-2.8091	-0.857667	-2.8091	-2.8091	-2.8091	-2.8091	-2.8091	-2.8091	-2.8091	-2.8091	-2.8091	-2.8091
rno-piR-10634	-2.8091	-2.8091	-1.37586	-2.8091	-2.8091	-2.8091	-2.8091	-2.8091	-2.8091	-2.8091	-2.8091	-2.8091	-2.8091	-2.8091	-2.8091	-2.8091	-0.912094	-2.8091	-2.8091	-2.8091	-2.8091	-2.8091	-2.8091	-2.8091
rno-piR-10636	0.702996	-2.8091	-0.284903	-0.817012	-2.8091	-2.8091	-2.8091	-2.8091	-2.8091	-2.8091	-2.8091	-2.8091	-2.8091	-2.8091	-2.8091	-2.8091	-0.269622	-0.401497	-2.8091	-2.8091	-2.8091	-2.8091	-2.8091	-2.8091
rno-piR-10637	0.702996	-1.21021	-0.380507	0.290504	-0.00243066	-2.8091	-2.8091	-2.8091	-2.8091	-0.291042	-2.8091	-2.8091	-2.8091	-2.8091	-2.8091	-2.8091	-2.8091	-0.401497	0.0317522	-2.8091	-2.8091	-2.8091	-2.8091	3.34827
rno-piR-10638	-2.8091	-2.8091	-2.8091	-2.8091	-0.691621	-2.8091	-2.8091	-2.8091	-2.8091	-2.8091	-2.8091	-2.8091	-2.8091	-2.8091	-2.8091	-2.8091	-2.8091	-2.8091	-2.8091	-2.8091	-2.8091	-2.8091	-2.8091	-2.8091
rno-piR-10639	0.228153	-2.8091	-1.9595	-2.8091	-2.8091	-0.403412	-2.8091	-2.8091	-2.8091	-0.291042	-2.8091	-2.8091	-2.8091	-2.8091	-2.8091	-2.8091	-2.8091	-2.8091	-2.8091	-2.8091	-2.8091	0.563112	-2.8091	-2.8091
rno-piR-1064	-2.8091	-1.21021	-0.851482	-0.817012	-2.8091	-2.8091	-2.8091	-2.8091	-2.8091	-2.8091	-2.8091	-2.8091	-2.8091	-0.857667	-2.8091	-2.8091	-0.912094	-2.8091	-2.8091	-2.8091	-2.8091	-2.8091	-2.8091	-2.8091
rno-piR-10640	-2.8091	-2.8091	-1.00219	-2.8091	-0.691621	-2.8091	-2.8091	-2.8091	-2.8091	-2.8091	-2.8091	-2.8091	-2.8091	-2.8091	-2.8091	-2.8091	-2.8091	-2.8091	0.0317522	-2.8091	-2.8091	-2.8091	-2.8091	-2.8091
rno-piR-10641	-0.497571	0.0587823	1.41763	1.65165	0.454729	-0.403412	-2.8091	0.646749	-2.8091	-2.8091	-2.8091	-2.8091	-2.8091	1.43551	3.43517	-2.8091	1.1807	1.47041	0.0317522	-2.8091	-2.8091	-2.8091	-2.8091	-2.8091
rno-piR-10643	-2.8091	-2.8091	-1.9595	-2.8091	-2.8091	-2.8091	1.99161	-2.8091	-2.8091	-2.8091	-2.8091	-2.8091	-2.8091	0.236575	-2.8091	-2.8091	-2.8091	-2.8091	0.0317522	-2.8091	-2.8091	-2.8091	-2.8091	-2.8091
rno-piR-10646	-2.8091	-2.8091	-0.851482	-2.8091	-0.691621	-2.8091	-2.8091	-2.8091	-2.8091	-2.8091	-2.8091	-2.8091	-2.8091	0.570591	-2.8091	-2.8091	-0.912094	-2.8091	-2.8091	-2.8091	-2.8091	-2.8091	-2.8091	-2.8091
rno-piR-10647	-0.497571	-1.21021	-0.483425	-0.153685	-0.00243066	-2.8091	-2.8091	-2.8091	-2.8091	0.469226	1.9153	-2.8091	-2.8091	-0.857667	-2.8091	-2.8091	-0.912094	-2.8091	0.0317522	1.30646	-2.8091	-2.8091	-2.8091	-2.8091
rno-piR-10648	-2.8091	-2.8091	-1.9595	-0.153685	-0.00243066	0.338593	-2.8091	-2.8091	-2.8091	-0.291042	-2.8091	-2.8091	-2.8091	0.236575	-2.8091	-2.8091	-2.8091	-2.8091	1.72527	-2.8091	-2.8091	-2.8091	1.88149	-2.8091
rno-piR-10649	-2.8091	-2.8091	-1.17414	-2.8091	-2.8091	0.821078	-2.8091	-2.8091	-2.8091	-2.8091	-2.8091	-2.8091	-2.8091	-2.8091	-2.8091	-2.8091	-0.912094	-2.8091	-2.8091	-2.8091	-2.8091	-2.8091	-2.8091	-2.8091
rno-piR-1065	-2.8091	-2.8091	-0.716865	-0.817012	-0.691621	-2.8091	-2.8091	-2.8091	-2.8091	-2.8091	-2.8091	-2.8091	-2.8091	-0.857667	-2.8091	-2.8091	-2.8091	-2.8091	-2.8091	1.83752	-2.8091	-2.8091	-2.8091	-2.8091
rno-piR-10650	-2.8091	-2.8091	-1.17414	-2.8091	-2.8091	-2.8091	1.08683	-2.8091	-2.8091	-2.8091	-2.8091	-2.8091	-2.8091	-2.8091	-2.8091	-2.8091	-2.8091	-2.8091	1.34924	-2.8091	-2.8091	-2.8091	-2.8091	-2.8091
rno-piR-10651	2.1196	-2.8091	-2.8091	-2.8091	-2.8091	0.338593	3.72484	0.646749	-2.8091	-2.8091	-2.8091	-2.8091	-2.8091	-2.8091	-2.8091	-2.8091	-2.8091	-2.8091	-2.8091	-2.8091	-2.8091	-2.8091	-2.8091	-2.8091
rno-piR-10652	-2.8091	-2.8091	-0.284903	-0.817012	-2.8091	-2.8091	-2.8091	-2.8091	-2.8091	-2.8091	-2.8091	2.03091	-2.8091	-0.857667	-2.8091	-2.8091	-2.8091	-2.8091	-2.8091	4.82202	-2.8091	-2.8091	-2.8091	-2.8091
rno-piR-10653	-2.8091	-2.8091	-1.9595	-2.8091	-0.691621	-2.8091	-2.8091	-2.8091	-2.8091	-2.8091	-2.8091	-2.8091	-2.8091	-2.8091	-2.8091	-2.8091	-2.8091	-0.401497	-2.8091	0.45269	-2.8091	-2.8091	-2.8091	2.38734
rno-piR-10654	-2.8091	-2.8091	-1.37586	-0.817012	-2.8091	-2.8091	-2.8091	-2.8091	-2.8091	-2.8091	-2.8091	-2.8091	-2.8091	-2.8091	-2.8091	-2.8091	-2.8091	-2.8091	-2.8091	-2.8091	-2.8091	-2.8091	-2.8091	-2.8091
rno-piR-10655	-2.8091	-2.8091	-1.62376	-2.8091	-0.691621	-2.8091	1.08683	-2.8091	-2.8091	-2.8091	2.46457	-2.8091	-2.8091	-0.203124	-2.8091	-2.8091	-2.8091	-2.8091	-2.8091	-2.8091	-2.8091	-2.8091	-2.8091	-2.8091
rno-piR-10656	-2.8091	-2.8091	-2.8091	-2.8091	-2.8091	-2.8091	-2.8091	-2.8091	-2.8091	-2.8091	-2.8091	-2.8091	-2.8091	-2.8091	-2.8091	-2.8091	-0.912094	-2.8091	-2.8091	-0.305325	-2.8091	-2.8091	-2.8091	-2.8091
rno-piR-10659	-2.8091	-0.246323	0.180423	-0.153685	0.454729	-2.8091	-2.8091	-2.8091	-2.8091	-2.8091	-2.8091	-2.8091	-2.8091	-0.857667	-2.8091	2.12834	-0.269622	-0.401497	-2.8091	-2.8091	-2.8091	-2.8091	-2.8091	-2.8091
rno-piR-10661	-2.8091	0.520875	0.421916	0.627278	-2.8091	-0.403412	-2.8091	-2.8091	-2.8091	-2.8091	-2.8091	-2.8091	-2.8091	1.26331	-2.8091	-2.8091	1.64266	0.823464	0.838007	-2.8091	-2.8091	-2.8091	-2.8091	-2.8091
rno-piR-10662	0.702996	-2.8091	-1.62376	-0.817012	-0.691621	-2.8091	-2.8091	-2.8091	-2.8091	-0.291042	-2.8091	-2.8091	-2.8091	-2.8091	-2.8091	-2.8091	-0.912094	-2.8091	-2.8091	-2.8091	-2.8091	-2.8091	-2.8091	-2.8091
rno-piR-10665	1.05817	0.0587823	0.528722	1.12746	2.10903	0.338593	4.36565	0.646749	5.0226	4.1782	-2.8091	-2.8091	-2.8091	-0.203124	-2.8091	-2.8091	-0.269622	0.340829	1.72527	-2.8091	-2.8091	3.31183	-2.8091	-2.8091
rno-piR-10667	-2.8091	-1.21021	-2.8091	-2.8091	-2.8091	-2.8091	-2.8091	-2.8091	-2.8091	-2.8091	-2.8091	-2.8091	-2.8091	-2.8091	-2.8091	-2.8091	-2.8091	-2.8091	-2.8091	1.30646	-2.8091	-2.8091	-2.8091	-2.8091
rno-piR-10668	-2.8091	-2.8091	-1.00219	-2.8091	-2.8091	-2.8091	1.99161	-2.8091	-2.8091	-2.8091	-2.8091	-2.8091	-2.8091	-0.857667	-2.8091	-2.8091	-2.8091	-0.401497	-2.8091	-2.8091	-2.8091	-2.8091	-2.8091	-2.8091
rno-piR-10669	0.228153	-2.8091	-0.195589	-0.817012	-2.8091	-2.8091	-2.8091	-2.8091	-2.8091	-2.8091	3.6445	-2.8091	-2.8091	-2.8091	-2.8091	-2.8091	-0.912094	-2.8091	-2.8091	-2.8091	-2.8091	-2.8091	-2.8091	-2.8091
rno-piR-1067	-0.497571	-0.640445	-0.0327353	0.899196	-0.00243066	2.39445	-2.8091	-2.8091	-2.8091	0.469226	-2.8091	-2.8091	-2.8091	0.236575	-2.8091	-2.8091	-0.912094	-0.401497	0.0317522	-2.8091	-2.8091	-2.8091	-2.8091	-2.8091
rno-piR-10671	-2.8091	-2.8091	-1.62376	-2.8091	-2.8091	0.338593	-2.8091	-2.8091	-2.8091	-0.291042	-2.8091	-2.8091	-2.8091	-2.8091	-2.8091	-2.8091	-2.8091	-2.8091	-2.8091	-2.8091	-2.8091	-2.8091	-2.8091	-2.8091
rno-piR-10672	-2.8091	-1.21021	-0.851482	-2.8091	0.79938	-2.8091	-2.8091	-2.8091	-2.8091	-0.291042	-2.8091	-2.8091	-2.8091	-2.8091	-2.8091	-2.8091	-2.8091	-0.401497	0.0317522	-2.8091	-2.8091	-2.8091	-2.8091	-2.8091
rno-piR-10673	-2.8091	-2.8091	-2.8091	-2.8091	-0.691621	-0.403412	-2.8091	-2.8091	-2.8091	-2.8091	-2.8091	5.84244	-2.8091	-0.857667	-2.8091	-2.8091	-2.8091	-2.8091	-2.8091	-2.8091	-2.8091	-2.8091	-2.8091	-2.8091
rno-piR-10675	-2.8091	-2.8091	-2.8091	-0.817012	-2.8091	0.338593	-2.8091	-2.8091	-2.8091	-2.8091	-2.8091	-2.8091	-2.8091	-2.8091	-2.8091	-2.8091	-2.8091	-2.8091	-2.8091	2.89147	-2.8091	-2.8091	-2.8091	-2.8091
rno-piR-10676	-0.497571	-0.640445	-1.17414	0.627278	-0.691621	0.821078	-2.8091	-2.8091	-2.8091	-0.291042	-2.8091	-2.8091	-2.8091	-2.8091	-2.8091	-2.8091	-2.8091	-2.8091	0.0317522	-2.8091	-2.8091	-2.8091	-2.8091	-2.8091
rno-piR-10677	-2.8091	-2.8091	-2.8091	-2.8091	-2.8091	-2.8091	-2.8091	-2.8091	-2.8091	-2.8091	-2.8091	-2.8091	-2.8091	-2.8091	-2.8091	-2.8091	-2.8091	-2.8091	0.0317522	-2.8091	-2.8091	-2.8091	-2.8091	-2.8091
rno-piR-10679	-2.8091	-2.8091	-0.483425	-0.817012	-0.00243066	-2.8091	-2.8091	0.646749	-2.8091	0.469226	-2.8091	-2.8091	-2.8091	-0.857667	-2.8091	-2.8091	-2.8091	-0.401497	-2.8091	-2.8091	-2.8091	-2.8091	-2.8091	-2.8091
rno-piR-1068	-2.8091	-1.21021	-1.17414	-2.8091	-0.691621	-2.8091	-2.8091	-2.8091	-2.8091	-2.8091	-2.8091	-2.8091	-2.8091	-2.8091	-2.8091	-2.8091	-0.269622	-2.8091	-2.8091	-2.8091	-2.8091	-2.8091	-2.8091	-2.8091
rno-piR-10680	-2.8091	-2.8091	-2.8091	-2.8091	-2.8091	-2.8091	-2.8091	-2.8091	-2.8091	0.960112	-2.8091	-2.8091	-2.8091	-2.8091	-2.8091	-2.8091	-2.8091	-2.8091	-2.8091	-2.8091	-2.8091	-2.8091	4.592	-2.8091
rno-piR-10681	-0.497571	-2.8091	-1.9595	-2.8091	-2.8091	-2.8091	-2.8091	-2.8091	-2.8091	-2.8091	-2.8091	-2.8091	-2.8091	-2.8091	-2.8091	-2.8091	-2.8091	-2.8091	-2.8091	-2.8091	-2.8091	-2.8091	-2.8091	-2.8091
rno-piR-10682	-2.8091	-2.8091	-0.380507	-0.817012	0.454729	-2.8091	-2.8091	0.646749	-2.8091	-2.8091	-2.8091	-2.8091	-2.8091	-2.8091	-2.8091	-2.8091	-2.8091	-2.8091	0.838007	-2.8091	-2.8091	3.62555	-2.8091	-2.8091
rno-piR-10684	-0.497571	0.308753	0.807944	1.32426	2.22684	1.46788	3.50757	2.05668	-2.8091	1.85633	-2.8091	-2.8091	-2.8091	0.840636	-2.8091	-2.8091	-2.8091	0.823464	2.02303	4.24427	-2.8091	-2.8091	-2.8091	-2.8091
rno-piR-10686	-2.8091	-2.8091	-1.17414	-2.8091	-2.8091	-2.8091	-2.8091	-2.8091	-2.8091	-2.8091	-2.8091	-2.8091	-2.8091	-2.8091	-2.8091	-2.8091	-2.8091	-2.8091	-2.8091	-2.8091	-2.8091	-2.8091	-2.8091	-2.8091
rno-piR-10688	-2.8091	-2.8091	-1.62376	-2.8091	-2.8091	-2.8091	-2.8091	-2.8091	-2.8091	-2.8091	-2.8091	-2.8091	-2.8091	-2.8091	-2.8091	-2.8091	-2.8091	-2.8091	-2.8091	-2.8091	-2.8091	-2.8091	-2.8091	-2.8091
rno-piR-1069	-2.8091	-1.21021	-0.851482	-2.8091	-2.8091	-2.8091	-2.8091	-2.8091	-2.8091	-0.291042	-2.8091	-2.8091	-2.8091	-2.8091	-2.8091	-2.8091	-2.8091	-2.8091	0.0317522	-2.8091	-2.8091	-2.8091	-2.8091	-2.8091
rno-piR-10690	-2.8091	-1.21021	-0.716865	-0.817012	-2.8091	-2.8091	-2.8091	-2.8091	2.2881	-2.8091	-2.8091	-2.8091	-2.8091	-0.203124	-2.8091	-2.8091	-2.8091	0.340829	0.0317522	-2.8091	-2.8091	-2.8091	-2.8091	-2.8091
rno-piR-10691	-2.8091	-2.8091	-2.8091	-2.8091	-0.691621	-2.8091	-2.8091	-2.8091	-2.8091	-2.8091	-2.8091	-2.8091	-2.8091	-2.8091	-2.8091	-2.8091	-2.8091	-2.8091	-2.8091	-2.8091	-2.8091	-2.8091	-2.8091	-2.8091
rno-piR-10692	-2.8091	-2.8091	-1.17414	-2.8091	-2.8091	-2.8091	-2.8091	-2.8091	-2.8091	-2.8091	-2.8091	-2.8091	-2.8091	-0.857667	-2.8091	-2.8091	-2.8091	-2.8091	-2.8091	-2.8091	-2.8091	-2.8091	-2.8091	-2.8091
rno-piR-10695	0.702996	-2.8091	-0.851482	-0.817012	0.79938	-2.8091	-2.8091	-2.8091	-2.8091	-2.8091	1.01527	2.98098	-2.8091	-0.857667	-2.8091	-2.8091	1.1807	0.823464	0.0317522	1.83752	-2.8091	-2.8091	-2.8091	-2.8091
rno-piR-10696	-2.8091	-2.8091	-1.9595	-0.153685	-2.8091	-2.8091	-2.8091	-2.8091	-2.8091	-2.8091	-2.8091	-2.8091	-2.8091	-2.8091	-2.8091	-2.8091	-2.8091	-2.8091	0.838007	-2.8091	-2.8091	-2.8091	-2.8091	-2.8091
rno-piR-10698	0.702996	-2.8091	0.528722	-0.153685	-0.00243066	0.338593	-2.8091	-2.8091	-2.8091	2.06297	-2.8091	-2.8091	3.92141	0.236575	-2.8091	-2.8091	-0.912094	-0.401497	1.72527	4.15816	-2.8091	0.563112	-2.8091	-2.8091
rno-piR-10699	-0.497571	-2.8091	-2.8091	-2.8091	-2.8091	-2.8091	-2.8091	1.51844	-2.8091	-2.8091	4.72652	-2.8091	-2.8091	-0.203124	-2.8091	2.89581	0.986392	-2.8091	-2.8091	2.04396	-2.8091	-2.8091	-2.8091	-2.8091
rno-piR-107	-2.8091	-2.8091	-1.62376	-2.8091	-2.8091	-2.8091	-2.8091	-2.8091	-2.8091	-2.8091	-2.8091	-2.8091	-2.8091	-2.8091	-2.8091	-2.8091	-2.8091	-2.8091	-2.8091	-2.8091	-2.8091	-2.8091	-2.8091	-2.8091
rno-piR-10701	-2.8091	0.308753	0.476328	0.899196	1.68365	-2.8091	4.9	-2.8091	-2.8091	-0.291042	-2.8091	-2.8091	-2.8091	-0.203124	-2.8091	-2.8091	1.1807	1.18319	1.34924	2.66031	-2.8091	0.563112	-2.8091	-2.8091
rno-piR-10703	-2.8091	-2.8091	-2.8091	-2.8091	-0.691621	-2.8091	-2.8091	-2.8091	-2.8091	-2.8091	-2.8091	-2.8091	-2.8091	-2.8091	-2.8091	-2.8091	-2.8091	-2.8091	-2.8091	-2.8091	-2.8091	-2.8091	-2.8091	-2.8091
rno-piR-10705	-2.8091	-2.8091	-2.8091	-2.8091	-0.691621	0.338593	-2.8091	-2.8091	-2.8091	-2.8091	-2.8091	-2.8091	-2.8091	-0.857667	-2.8091	-2.8091	-2.8091	-2.8091	-2.8091	-2.8091	-2.8091	-2.8091	-2.8091	-2.8091
rno-piR-10706	-2.8091	-2.8091	-1.9595	-2.8091	-0.00243066	-2.8091	-2.8091	-2.8091	-2.8091	-2.8091	-2.8091	-2.8091	-2.8091	-2.8091	-2.8091	-2.8091	-2.8091	-2.8091	-2.8091	-2.8091	-2.8091	-2.8091	-2.8091	-2.8091
rno-piR-10707	-0.497571	-2.8091	-1.62376	-2.8091	-0.691621	-2.8091	-2.8091	-2.8091	-2.8091	-2.8091	-2.8091	-2.8091	-2.8091	-2.8091	-2.8091	-2.8091	-2.8091	-2.8091	-2.8091	-2.8091	-2.8091	-2.8091	-2.8091	-2.8091
rno-piR-10708	-2.8091	-2.8091	-2.8091	-2.8091	-2.8091	-0.403412	-2.8091	-2.8091	-2.8091	-2.8091	-2.8091	-2.8091	-2.8091	-2.8091	-2.8091	-2.8091	-2.8091	-2.8091	-2.8091	-2.8091	-2.8091	-2.8091	-2.8091	-2.8091
rno-piR-10710	-0.497571	-2.8091	-2.8091	-0.817012	-2.8091	-2.8091	-2.8091	-2.8091	-2.8091	-2.8091	-2.8091	-2.8091	-2.8091	-2.8091	-2.8091	-2.8091	-2.8091	-2.8091	-2.8091	-2.8091	-2.8091	-2.8091	-2.8091	-2.8091
rno-piR-10711	-2.8091	-2.8091	-1.9595	-2.8091	-2.8091	-2.8091	-2.8091	-2.8091	-2.8091	-2.8091	-2.8091	-2.8091	-2.8091	-2.8091	-2.8091	-2.8091	-2.8091	-2.8091	-2.8091	-2.8091	-2.8091	-2.8091	-2.8091	-2.8091
rno-piR-10712	1.7829	0.705286	1.04127	2.14282	0.79938	1.18072	-2.8091	-2.8091	-2.8091	3.36552	3.83307	2.03091	-2.8091	1.06754	-2.8091	-2.8091	0.493989	1.47041	1.34924	3.34571	-2.8091	0.563112	-2.8091	-2.8091
rno-piR-10713	-2.8091	-2.8091	-2.8091	-2.8091	-2.8091	-2.8091	-2.8091	-2.8091	-2.8091	-2.8091	-2.8091	-2.8091	-2.8091	-0.857667	-2.8091	-2.8091	-2.8091	-2.8091	-2.8091	-2.8091	-2.8091	-2.8091	-2.8091	-2.8091
rno-piR-10714	-2.8091	-2.8091	-1.9595	-2.8091	-2.8091	-2.8091	-2.8091	-2.8091	-2.8091	-2.8091	-2.8091	-2.8091	-2.8091	-2.8091	-2.8091	-2.8091	-2.8091	-2.8091	-2.8091	-2.8091	-2.8091	-2.8091	-2.8091	-2.8091
rno-piR-10715	-2.8091	-2.8091	-2.8091	-2.8091	-2.8091	-2.8091	-2.8091	-2.8091	-2.8091	-2.8091	-2.8091	-2.8091	-2.8091	-2.8091	-2.8091	-2.8091	-2.8091	-2.8091	-2.8091	-2.8091	-2.8091	1.42735	-2.8091	-2.8091
rno-piR-10716	-2.8091	-2.8091	-1.9595	-2.8091	-2.8091	-2.8091	-2.8091	-2.8091	-2.8091	-2.8091	-2.8091	-2.8091	-2.8091	-2.8091	-2.8091	-2.8091	-2.8091	-2.8091	0.0317522	-2.8091	-2.8091	-2.8091	-2.8091	-2.8091
rno-piR-10717	-2.8091	-2.8091	-1.62376	-0.817012	-2.8091	-2.8091	-2.8091	-2.8091	-2.8091	-2.8091	2.46457	-2.8091	-2.8091	-0.203124	-2.8091	-2.8091	-2.8091	-0.401497	-2.8091	-2.8091	-2.8091	-2.8091	-2.8091	-2.8091
rno-piR-10718	-2.8091	-2.8091	-2.8091	-2.8091	-0.691621	-2.8091	-2.8091	-2.8091	-2.8091	-2.8091	-2.8091	-2.8091	-2.8091	-2.8091	-2.8091	-2.8091	-2.8091	-2.8091	-2.8091	-2.8091	-2.8091	-2.8091	-2.8091	-2.8091
rno-piR-1072	-2.8091	-2.8091	-2.8091	-2.8091	-0.00243066	-2.8091	-2.8091	-2.8091	-2.8091	-2.8091	-2.8091	-2.8091	-2.8091	-0.857667	-2.8091	-2.8091	-2.8091	-2.8091	-2.8091	-2.8091	-2.8091	-2.8091	-2.8091	-2.8091
rno-piR-10720	-0.497571	-0.246323	0.92937	0.899196	0.79938	0.821078	3.25166	-2.8091	-2.8091	-2.8091	1.01527	-2.8091	-2.8091	0.236575	-2.8091	-2.8091	0.986392	1.18319	0.0317522	-2.8091	-2.8091	0.563112	1.88149	-2.8091
rno-piR-10721	-2.8091	-2.8091	-1.00219	-2.8091	-2.8091	-2.8091	-2.8091	-2.8091	-2.8091	-2.8091	-2.8091	-2.8091	-2.8091	-2.8091	-2.8091	-2.8091	-0.912094	-2.8091	-2.8091	-2.8091	-2.8091	-2.8091	-2.8091	-2.8091
rno-piR-10723	-2.8091	-1.21021	-2.8091	-2.8091	-2.8091	-2.8091	-2.8091	-2.8091	-2.8091	-2.8091	-2.8091	-2.8091	-2.8091	-2.8091	-2.8091	-2.8091	-2.8091	-2.8091	-2.8091	-2.8091	-2.8091	-2.8091	-2.8091	-2.8091
rno-piR-10725	-2.8091	-2.8091	-1.9595	-2.8091	-2.8091	-2.8091	-2.8091	-2.8091	-2.8091	-2.8091	-2.8091	-2.8091	-2.8091	-2.8091	-2.8091	-2.8091	-2.8091	-0.401497	-2.8091	-2.8091	-2.8091	-2.8091	-2.8091	-2.8091
rno-piR-10726	-2.8091	-2.8091	-2.8091	-2.8091	-2.8091	-2.8091	-2.8091	-2.8091	-2.8091	-2.8091	-2.8091	-2.8091	-2.8091	-2.8091	-2.8091	-2.8091	-2.8091	-2.8091	0.0317522	-2.8091	-2.8091	-2.8091	-2.8091	-2.8091
rno-piR-10727	-2.8091	-2.8091	-1.17414	-2.8091	-0.691621	-2.8091	-2.8091	-2.8091	-2.8091	-2.8091	-2.8091	-2.8091	-2.8091	-2.8091	-2.8091	-2.8091	-2.8091	-2.8091	-2.8091	1.5964	-2.8091	1.42735	-2.8091	-2.8091
rno-piR-10728	-2.8091	-2.8091	-1.17414	-2.8091	-0.00243066	-2.8091	-2.8091	-2.8091	-2.8091	-2.8091	-2.8091	-2.8091	-2.8091	-0.857667	-2.8091	-2.8091	-2.8091	-2.8091	-2.8091	-2.8091	-2.8091	-2.8091	-2.8091	-2.8091
rno-piR-10730	-2.8091	-1.21021	-1.9595	-2.8091	-2.8091	-2.8091	-2.8091	-2.8091	-2.8091	-2.8091	-2.8091	-2.8091	-2.8091	-2.8091	-2.8091	4.4439	-2.8091	-2.8091	-2.8091	-2.8091	-2.8091	-2.8091	-2.8091	-2.8091
rno-piR-10733	-2.8091	-2.8091	-2.8091	-2.8091	-2.8091	-2.8091	-2.8091	-2.8091	-2.8091	1.61494	-2.8091	-2.8091	-2.8091	-2.8091	-2.8091	-2.8091	-2.8091	-2.8091	-2.8091	-0.305325	-2.8091	-2.8091	-2.8091	-2.8091
rno-piR-10736	-2.8091	-2.8091	-0.851482	-2.8091	-0.00243066	-2.8091	-2.8091	-2.8091	-2.8091	-2.8091	-2.8091	-2.8091	-2.8091	-2.8091	-2.8091	-2.8091	-0.269622	-0.401497	-2.8091	-2.8091	-2.8091	-2.8091	-2.8091	-2.8091
rno-piR-10737	-2.8091	-2.8091	-0.380507	-0.817012	-0.691621	-2.8091	-2.8091	-2.8091	-2.8091	-2.8091	-2.8091	-2.8091	-2.8091	-2.8091	-2.8091	-2.8091	-0.912094	-0.401497	-2.8091	-2.8091	-2.8091	-2.8091	-2.8091	-2.8091
rno-piR-10738	-2.8091	-1.21021	-2.8091	-2.8091	-2.8091	-2.8091	-2.8091	-2.8091	-2.8091	-2.8091	-2.8091	-2.8091	-2.8091	-0.857667	-2.8091	-2.8091	-2.8091	-2.8091	-2.8091	-2.8091	-2.8091	-2.8091	-2.8091	-2.8091
rno-piR-1074	-2.8091	-2.8091	-1.62376	-2.8091	-2.8091	-0.403412	-2.8091	-2.8091	-2.8091	-2.8091	-2.8091	-2.8091	-2.8091	-2.8091	-2.8091	-2.8091	-2.8091	-2.8091	-2.8091	-2.8091	-2.8091	-2.8091	-2.8091	-2.8091
rno-piR-10740	-0.497571	-1.21021	-1.9595	-2.8091	-0.691621	-2.8091	3.72484	0.646749	-2.8091	1.85633	4.28467	2.98098	-2.8091	-2.8091	-2.8091	-2.8091	-2.8091	-0.401497	0.0317522	-2.8091	-2.8091	-2.8091	-2.8091	-2.8091
rno-piR-10741	-2.8091	0.308753	-0.195589	0.627278	0.454729	-2.8091	-2.8091	-2.8091	-2.8091	-2.8091	-2.8091	-2.8091	-2.8091	-2.8091	-2.8091	0.370133	-2.8091	-0.401497	0.838007	-2.8091	-2.8091	-2.8091	-2.8091	-2.8091
rno-piR-10742	-2.8091	-2.8091	-1.62376	-2.8091	-2.8091	-2.8091	-2.8091	-2.8091	-2.8091	-2.8091	-2.8091	-2.8091	-2.8091	-2.8091	-2.8091	-2.8091	-2.8091	-2.8091	-2.8091	-2.8091	-2.8091	-2.8091	-2.8091	-2.8091
rno-piR-10743	-2.8091	-2.8091	-1.62376	-2.8091	-2.8091	-2.8091	-2.8091	-2.8091	-2.8091	-2.8091	-2.8091	-2.8091	-2.8091	-2.8091	-2.8091	-2.8091	-2.8091	-2.8091	-2.8091	-2.8091	-2.8091	-2.8091	-2.8091	-2.8091
rno-piR-10744	-2.8091	-2.8091	-0.195589	-0.153685	-2.8091	-2.8091	-2.8091	-2.8091	-2.8091	-2.8091	-2.8091	-2.8091	-2.8091	-0.203124	-2.8091	-2.8091	-0.269622	-0.401497	-2.8091	-2.8091	-2.8091	-2.8091	-2.8091	-2.8091
rno-piR-10745	-2.8091	-2.8091	-1.9595	-2.8091	-2.8091	-2.8091	-2.8091	-2.8091	-2.8091	-2.8091	-2.8091	-2.8091	-2.8091	-2.8091	3.43517	-2.8091	-2.8091	-2.8091	-2.8091	-2.8091	-2.8091	-2.8091	-2.8091	-2.8091
rno-piR-10746	-2.8091	-2.8091	-1.62376	-2.8091	-2.8091	-2.8091	-2.8091	-2.8091	-2.8091	-2.8091	-2.8091	-2.8091	-2.8091	-2.8091	-2.8091	-2.8091	-0.912094	-2.8091	-2.8091	-2.8091	-2.8091	-2.8091	-2.8091	-2.8091
rno-piR-10747	-0.497571	-1.21021	-0.851482	-0.817012	-0.00243066	-2.8091	-2.8091	-2.8091	-2.8091	1.85633	-2.8091	-2.8091	-2.8091	-0.857667	-2.8091	-2.8091	0.163835	-2.8091	-2.8091	-2.8091	-2.8091	-2.8091	-2.8091	-2.8091
rno-piR-10748	-2.8091	-2.8091	-1.62376	-2.8091	-2.8091	-2.8091	-2.8091	-2.8091	-2.8091	-2.8091	-2.8091	-2.8091	-2.8091	-2.8091	-2.8091	-2.8091	-2.8091	-2.8091	-2.8091	-2.8091	-2.8091	-2.8091	-2.8091	-2.8091
rno-piR-10750	-2.8091	-2.8091	-1.17414	-2.8091	-2.8091	-2.8091	1.08683	-2.8091	-2.8091	-2.8091	-2.8091	-2.8091	-2.8091	-2.8091	-2.8091	-2.8091	-2.8091	-2.8091	-2.8091	-2.8091	-2.8091	-2.8091	-2.8091	-2.8091
rno-piR-10751	-2.8091	-2.8091	-2.8091	-2.8091	-2.8091	-2.8091	-2.8091	-2.8091	-2.8091	0.960112	-2.8091	-2.8091	-2.8091	-2.8091	-2.8091	-2.8091	-2.8091	-2.8091	-2.8091	-2.8091	-2.8091	-2.8091	-2.8091	-2.8091
rno-piR-10755	0.228153	-0.640445	0.306354	0.290504	1.83985	-2.8091	-2.8091	-2.8091	-2.8091	-2.8091	-2.8091	-2.8091	-2.8091	-0.203124	-2.8091	-2.8091	-2.8091	-0.401497	1.34924	-2.8091	-2.8091	-2.8091	-2.8091	-2.8091
rno-piR-10758	-2.8091	-2.8091	-2.8091	-2.8091	-2.8091	-2.8091	-2.8091	-2.8091	2.2881	-2.8091	5.67011	2.03091	-2.8091	-2.8091	-2.8091	-2.8091	-2.8091	-2.8091	-2.8091	-2.8091	-2.8091	-2.8091	-2.8091	-2.8091
rno-piR-10759	1.34239	-0.640445	-0.111754	0.627278	1.07661	0.821078	-2.8091	-2.8091	-2.8091	-0.291042	-2.8091	-2.8091	-2.8091	-2.8091	-2.8091	-2.8091	0.986392	-0.401497	0.838007	-2.8091	-2.8091	-2.8091	-2.8091	-2.8091
rno-piR-1076	-2.8091	-2.8091	-1.9595	-2.8091	-2.8091	-2.8091	-2.8091	-2.8091	-2.8091	-2.8091	-2.8091	-2.8091	-2.8091	-2.8091	-2.8091	-2.8091	-2.8091	-2.8091	-2.8091	-2.8091	-2.8091	-2.8091	-2.8091	-2.8091
rno-piR-10760	-2.8091	-2.8091	-1.62376	-2.8091	-0.691621	-0.403412	-2.8091	-2.8091	-2.8091	-2.8091	-2.8091	-2.8091	-2.8091	-2.8091	-2.8091	-2.8091	-2.8091	-2.8091	-2.8091	-2.8091	-2.8091	-2.8091	-2.8091	-2.8091
rno-piR-10762	-2.8091	-2.8091	-1.00219	-2.8091	-2.8091	-2.8091	-2.8091	0.646749	-2.8091	-2.8091	-2.8091	-2.8091	-2.8091	-2.8091	-2.8091	-2.8091	-0.912094	-0.401497	-2.8091	-2.8091	-2.8091	-2.8091	-2.8091	-2.8091
rno-piR-10763	-2.8091	-2.8091	-1.9595	-2.8091	-2.8091	-2.8091	2.54268	-2.8091	-2.8091	-2.8091	-2.8091	-2.8091	-2.8091	-2.8091	-2.8091	-2.8091	-2.8091	-2.8091	-2.8091	-2.8091	-2.8091	-2.8091	-2.8091	-2.8091
rno-piR-10764	-2.8091	-2.8091	-1.37586	-0.817012	-0.691621	-2.8091	-2.8091	-2.8091	-2.8091	-2.8091	-2.8091	-2.8091	-2.8091	-0.857667	-2.8091	-2.8091	-0.912094	-2.8091	-2.8091	-2.8091	-2.8091	-2.8091	-2.8091	-2.8091
rno-piR-10765	0.702996	-1.21021	-0.111754	-2.8091	-0.691621	-2.8091	1.08683	-2.8091	-2.8091	-2.8091	1.01527	-2.8091	-2.8091	-0.857667	-2.8091	-2.8091	0.163835	-2.8091	0.0317522	2.52915	-2.8091	-2.8091	-2.8091	-2.8091
rno-piR-10766	-2.8091	-2.8091	-1.9595	-2.8091	-2.8091	-2.8091	-2.8091	-2.8091	-2.8091	-2.8091	-2.8091	-2.8091	-2.8091	-2.8091	-2.8091	-2.8091	-2.8091	-2.8091	-2.8091	-2.8091	-2.8091	-2.8091	-2.8091	-2.8091
rno-piR-10767	-2.8091	-2.8091	-0.594968	-0.817012	-0.691621	0.338593	-2.8091	-2.8091	-2.8091	-2.8091	-2.8091	-2.8091	-2.8091	-0.857667	-2.8091	-2.8091	-2.8091	-0.401497	-2.8091	-2.8091	-2.8091	-2.8091	-2.8091	-2.8091
rno-piR-10768	-2.8091	-2.8091	-1.62376	-2.8091	-2.8091	-2.8091	-2.8091	-2.8091	-2.8091	-2.8091	-2.8091	-2.8091	-2.8091	-2.8091	-2.8091	-2.8091	-2.8091	-2.8091	-2.8091	-2.8091	-2.8091	-2.8091	-2.8091	-2.8091
rno-piR-10769	-2.8091	-1.21021	-1.9595	-2.8091	-2.8091	-2.8091	-2.8091	0.646749	-2.8091	-2.8091	-2.8091	-2.8091	-2.8091	-2.8091	-2.8091	-2.8091	-2.8091	-2.8091	-2.8091	-2.8091	-2.8091	-2.8091	-2.8091	-2.8091
rno-piR-1077	-2.8091	-2.8091	-1.62376	-2.8091	-2.8091	-2.8091	-2.8091	-2.8091	-2.8091	-2.8091	-2.8091	-2.8091	-2.8091	-2.8091	-2.8091	-2.8091	-2.8091	-2.8091	-2.8091	-2.8091	-2.8091	-2.8091	-2.8091	-2.8091
rno-piR-10772	-0.497571	-2.8091	-1.62376	-2.8091	-0.00243066	-2.8091	-2.8091	-2.8091	-2.8091	-2.8091	-2.8091	-2.8091	-2.8091	-2.8091	-2.8091	-2.8091	-2.8091	-2.8091	-2.8091	-2.8091	-2.8091	-2.8091	-2.8091	-2.8091
rno-piR-10773	-2.8091	-2.8091	-2.8091	-2.8091	-2.8091	-0.403412	-2.8091	-2.8091	-2.8091	-2.8091	-2.8091	-2.8091	-2.8091	-2.8091	-2.8091	-2.8091	-2.8091	-2.8091	-2.8091	-2.8091	-2.8091	-2.8091	-2.8091	-2.8091
rno-piR-10775	-2.8091	-2.8091	-1.9595	-2.8091	-2.8091	-2.8091	-2.8091	-2.8091	-2.8091	-2.8091	-2.8091	-2.8091	-2.8091	-2.8091	-2.8091	-2.8091	-2.8091	-2.8091	-2.8091	-2.8091	-2.8091	-2.8091	-2.8091	-2.8091
rno-piR-10776	-2.8091	-2.8091	-1.9595	-2.8091	-2.8091	-2.8091	-2.8091	-2.8091	-2.8091	-2.8091	-2.8091	-2.8091	-2.8091	-2.8091	-2.8091	-2.8091	-0.912094	-2.8091	-2.8091	-2.8091	-2.8091	-2.8091	-2.8091	-2.8091
rno-piR-10777	-2.8091	-2.8091	-2.8091	-2.8091	-2.8091	-2.8091	-2.8091	-2.8091	-2.8091	-0.291042	-2.8091	-2.8091	-2.8091	-2.8091	-2.8091	-2.8091	-2.8091	-2.8091	-2.8091	-2.8091	-2.8091	-2.8091	-2.8091	-2.8091
rno-piR-10778	-2.8091	-0.640445	0.528722	0.290504	0.454729	0.821078	-2.8091	0.646749	-2.8091	1.61494	-2.8091	-2.8091	-2.8091	0.840636	-2.8091	-2.8091	-0.269622	-0.401497	0.0317522	-2.8091	-2.8091	-2.8091	-2.8091	0.944813
rno-piR-10780	-2.8091	-2.8091	-1.62376	-2.8091	-2.8091	-2.8091	-2.8091	-2.8091	-2.8091	-2.8091	-2.8091	-2.8091	-2.8091	-2.8091	-2.8091	-2.8091	-2.8091	-2.8091	-2.8091	-2.8091	-2.8091	-2.8091	-2.8091	-2.8091
rno-piR-10781	-2.8091	-1.21021	-2.8091	-2.8091	-2.8091	-2.8091	-2.8091	-2.8091	-2.8091	-2.8091	-2.8091	-2.8091	-2.8091	-2.8091	-2.8091	-2.8091	-2.8091	-2.8091	-2.8091	-2.8091	-2.8091	-2.8091	-2.8091	-2.8091
rno-piR-10784	-2.8091	-2.8091	-2.8091	-2.8091	-2.8091	-2.8091	-2.8091	-2.8091	-2.8091	-2.8091	-2.8091	-2.8091	-2.8091	-0.203124	-2.8091	-2.8091	-2.8091	-2.8091	-2.8091	-2.8091	-2.8091	-2.8091	-2.8091	-2.8091
rno-piR-10786	-2.8091	-2.8091	-1.62376	-2.8091	-2.8091	-2.8091	-2.8091	-2.8091	-2.8091	-2.8091	-2.8091	-2.8091	-2.8091	-2.8091	-2.8091	-2.8091	-0.912094	-2.8091	-2.8091	-2.8091	-2.8091	-2.8091	-2.8091	-2.8091
rno-piR-10787	-2.8091	-0.640445	0.112934	2.14282	2.22684	1.18072	4.23013	2.05668	-2.8091	3.58226	5.13768	5.5223	-2.8091	1.06754	-2.8091	0.370133	-2.8091	0.823464	3.6314	4.54501	4.15506	4.45877	-2.8091	4.73806
rno-piR-10788	-0.497571	-2.8091	-2.8091	-2.8091	-0.691621	-2.8091	-2.8091	-2.8091	-2.8091	-2.8091	-2.8091	-2.8091	-2.8091	-2.8091	-2.8091	-2.8091	-2.8091	-2.8091	0.0317522	-2.8091	-2.8091	-2.8091	-2.8091	-2.8091
rno-piR-10789	-2.8091	-1.21021	-1.9595	-2.8091	-2.8091	-2.8091	-2.8091	-2.8091	-2.8091	-2.8091	-2.8091	-2.8091	-2.8091	-2.8091	-2.8091	-2.8091	-2.8091	-2.8091	-2.8091	-2.8091	-2.8091	-2.8091	-2.8091	-2.8091
rno-piR-1079	0.228153	-2.8091	-1.9595	-2.8091	-2.8091	-2.8091	1.08683	-2.8091	-2.8091	-2.8091	-2.8091	-2.8091	-2.8091	-2.8091	-2.8091	-2.8091	-2.8091	-2.8091	-2.8091	-2.8091	-2.8091	-2.8091	-2.8091	-2.8091
rno-piR-10790	-2.8091	-2.8091	-0.716865	-2.8091	-2.8091	-2.8091	-2.8091	-2.8091	-2.8091	-2.8091	-2.8091	-2.8091	-2.8091	-0.857667	-2.8091	-2.8091	-0.269622	-2.8091	-2.8091	-2.8091	-2.8091	-2.8091	-2.8091	-2.8091
rno-piR-10791	-0.497571	-1.21021	-2.8091	-0.817012	-2.8091	-2.8091	-2.8091	-2.8091	-2.8091	-2.8091	-2.8091	-2.8091	-2.8091	-2.8091	-2.8091	-2.8091	-0.912094	-2.8091	-2.8091	-2.8091	-2.8091	-2.8091	-2.8091	-2.8091
rno-piR-10792	-2.8091	-2.8091	-2.8091	-2.8091	-2.8091	-2.8091	1.08683	-2.8091	-2.8091	-2.8091	-2.8091	-2.8091	-2.8091	-2.8091	-2.8091	-2.8091	-2.8091	-2.8091	-2.8091	-2.8091	-2.8091	-2.8091	-2.8091	-2.8091
rno-piR-10794	-2.8091	-2.8091	-2.8091	-2.8091	-2.8091	-2.8091	-2.8091	-2.8091	-2.8091	-2.8091	-2.8091	-2.8091	-2.8091	-2.8091	-2.8091	-2.8091	-0.269622	-2.8091	-2.8091	-2.8091	-2.8091	-2.8091	-2.8091	-2.8091
rno-piR-10795	-2.8091	-1.21021	-0.851482	-2.8091	0.79938	-2.8091	-2.8091	-2.8091	-2.8091	-2.8091	-2.8091	-2.8091	-2.8091	-2.8091	-2.8091	-2.8091	-2.8091	-0.401497	0.0317522	-0.305325	-2.8091	-2.8091	-2.8091	-2.8091
rno-piR-10796	-2.8091	-2.8091	-2.8091	-2.8091	-2.8091	-2.8091	-2.8091	-2.8091	-2.8091	-2.8091	-2.8091	-2.8091	-2.8091	-2.8091	-2.8091	-2.8091	-2.8091	-2.8091	-2.8091	-2.8091	-2.8091	-2.8091	-2.8091	3.91985
rno-piR-10799	-2.8091	-2.8091	-2.8091	-2.8091	-0.691621	-2.8091	-2.8091	-2.8091	-2.8091	-2.8091	-2.8091	-2.8091	-2.8091	-2.8091	-2.8091	-2.8091	-2.8091	-2.8091	-2.8091	-2.8091	-2.8091	-2.8091	-2.8091	-2.8091
rno-piR-108	-0.497571	-2.8091	-0.594968	-2.8091	-2.8091	-0.403412	-2.8091	-2.8091	4.8023	-2.8091	-2.8091	3.95503	5.05849	-0.203124	5.72657	0.370133	-0.912094	-2.8091	0.0317522	1.5964	-2.8091	0.563112	2.82617	-2.8091
rno-piR-10801	1.05817	-0.640445	-1.9595	-0.153685	-0.691621	-0.403412	-2.8091	-2.8091	-2.8091	-2.8091	-2.8091	-2.8091	-2.8091	-2.8091	-2.8091	-2.8091	-2.8091	-2.8091	0.0317522	-2.8091	-2.8091	-2.8091	-2.8091	-2.8091
rno-piR-10803	-2.8091	-2.8091	-1.9595	-2.8091	-2.8091	-2.8091	-2.8091	2.44751	-2.8091	-2.8091	-2.8091	-2.8091	-2.8091	-2.8091	-2.8091	-2.8091	-2.8091	-2.8091	-2.8091	-2.8091	-2.8091	-2.8091	-2.8091	-2.8091
rno-piR-10804	-2.8091	-1.21021	-1.62376	-2.8091	-2.8091	-2.8091	-2.8091	-2.8091	-2.8091	-2.8091	-2.8091	-2.8091	-2.8091	-2.8091	-2.8091	-2.8091	-2.8091	-0.401497	-2.8091	-2.8091	-2.8091	-2.8091	-2.8091	-2.8091
rno-piR-10805	1.57947	2.24541	4.11227	3.51319	2.78293	0.338593	-2.8091	2.05668	-2.8091	2.40414	2.46457	-2.8091	-2.8091	3.92116	-2.8091	-2.8091	4.23015	2.52767	0.838007	-2.8091	-2.8091	-2.8091	-2.8091	-2.8091
rno-piR-10806	-2.8091	-1.21021	-1.00219	-0.153685	-0.691621	-2.8091	-2.8091	-2.8091	-2.8091	-2.8091	-2.8091	-2.8091	-2.8091	-2.8091	-2.8091	-2.8091	-2.8091	-0.401497	-2.8091	-2.8091	-2.8091	-2.8091	1.88149	-2.8091
rno-piR-10807	-2.8091	-2.8091	-0.716865	-2.8091	-2.8091	-2.8091	-2.8091	-2.8091	-2.8091	-2.8091	-2.8091	-2.8091	-2.8091	1.06754	-2.8091	-2.8091	-0.912094	-2.8091	-2.8091	-2.8091	-2.8091	-2.8091	-2.8091	-2.8091
rno-piR-10809	0.228153	-2.8091	-2.8091	-2.8091	-2.8091	-2.8091	-2.8091	-2.8091	-2.8091	-2.8091	-2.8091	-2.8091	-2.8091	-2.8091	-2.8091	-2.8091	-2.8091	-2.8091	-2.8091	-2.8091	-2.8091	-2.8091	-2.8091	-2.8091
rno-piR-1081	-2.8091	-2.8091	-1.9595	-2.8091	-2.8091	-2.8091	-2.8091	-2.8091	-2.8091	-2.8091	-2.8091	-2.8091	-2.8091	-2.8091	-2.8091	-2.8091	-2.8091	-2.8091	0.0317522	-2.8091	-2.8091	-2.8091	-2.8091	-2.8091
rno-piR-10810	-2.8091	-2.8091	-0.851482	-2.8091	-0.691621	-2.8091	-2.8091	-2.8091	-2.8091	-2.8091	-2.8091	-2.8091	-2.8091	-2.8091	-2.8091	3.39396	0.163835	-0.401497	-2.8091	-2.8091	-2.8091	-2.8091	-2.8091	-2.8091
rno-piR-10812	0.228153	-2.8091	-0.380507	-0.817012	-0.691621	0.821078	3.72484	0.646749	-2.8091	-0.291042	-2.8091	5.84244	-2.8091	-2.8091	-2.8091	-2.8091	-2.8091	-0.401497	1.72527	2.38485	-2.8091	2.91032	-2.8091	-2.8091
rno-piR-10813	0.228153	-2.8091	-1.62376	-2.8091	-2.8091	-0.403412	-2.8091	-2.8091	-2.8091	-2.8091	-2.8091	2.03091	-2.8091	-0.857667	-2.8091	-2.8091	-2.8091	-0.401497	0.0317522	-2.8091	-2.8091	4.45877	-2.8091	-2.8091
rno-piR-10814	-2.8091	-0.640445	-1.00219	-2.8091	-0.00243066	-2.8091	-2.8091	-2.8091	-2.8091	-2.8091	-2.8091	-2.8091	-2.8091	-2.8091	-2.8091	-2.8091	-2.8091	0.340829	-2.8091	-2.8091	-2.8091	-2.8091	-2.8091	-2.8091
rno-piR-10815	-2.8091	-2.8091	-2.8091	-2.8091	-2.8091	-2.8091	-2.8091	-2.8091	-2.8091	-2.8091	1.01527	-2.8091	-2.8091	-2.8091	-2.8091	-2.8091	-2.8091	-2.8091	-2.8091	-2.8091	-2.8091	-2.8091	-2.8091	-2.8091
rno-piR-10817	-2.8091	-2.8091	-0.851482	-2.8091	-0.691621	-2.8091	-2.8091	-2.8091	-2.8091	-2.8091	-2.8091	-2.8091	-2.8091	-2.8091	-2.8091	-2.8091	-0.912094	-2.8091	1.72527	-2.8091	-2.8091	-2.8091	-2.8091	-2.8091
rno-piR-10818	-2.8091	-2.8091	-1.37586	-2.8091	-0.691621	-2.8091	-2.8091	-2.8091	-2.8091	-2.8091	-2.8091	-2.8091	-2.8091	-0.857667	-2.8091	-2.8091	-2.8091	-2.8091	0.0317522	-2.8091	-2.8091	-2.8091	-2.8091	-2.8091
rno-piR-10819	0.228153	-2.8091	-1.9595	-2.8091	-2.8091	-2.8091	-2.8091	-2.8091	-2.8091	-2.8091	-2.8091	-2.8091	-2.8091	-2.8091	-2.8091	-2.8091	-2.8091	-2.8091	-2.8091	-2.8091	-2.8091	-2.8091	-2.8091	-2.8091
rno-piR-1082	1.34239	-0.246323	2.26721	2.98505	0.79938	0.821078	-2.8091	2.75461	-2.8091	2.67978	-2.8091	-2.8091	-2.8091	1.26331	-2.8091	3.08165	1.64266	0.340829	2.26962	3.56238	-2.8091	3.62555	-2.8091	-2.8091
rno-piR-10820	-2.8091	-2.8091	-1.37586	-2.8091	-0.00243066	-0.403412	-2.8091	-2.8091	-2.8091	-0.291042	-2.8091	-2.8091	-2.8091	-2.8091	-2.8091	-2.8091	-2.8091	-2.8091	1.34924	-2.8091	-2.8091	-2.8091	-2.8091	-2.8091
rno-piR-10822	-2.8091	-2.8091	-1.62376	-2.8091	-0.691621	1.46788	1.08683	-2.8091	-2.8091	-2.8091	-2.8091	-2.8091	-2.8091	0.236575	-2.8091	-2.8091	-2.8091	-0.401497	0.0317522	-2.8091	-2.8091	-2.8091	-2.8091	-2.8091
rno-piR-10825	-2.8091	-0.640445	-1.00219	-0.817012	-0.00243066	-2.8091	-2.8091	-2.8091	-2.8091	-0.291042	-2.8091	-2.8091	-2.8091	0.570591	-2.8091	-2.8091	-0.912094	-0.401497	-2.8091	-2.8091	-2.8091	-2.8091	-2.8091	-2.8091
rno-piR-10826	-2.8091	-1.21021	-1.37586	-2.8091	-2.8091	-0.403412	3.25166	-2.8091	-2.8091	-2.8091	-2.8091	-2.8091	-2.8091	-2.8091	-2.8091	-2.8091	-2.8091	-2.8091	-2.8091	-2.8091	-2.8091	-2.8091	-2.8091	-2.8091
rno-piR-10827	-2.8091	-2.8091	-2.8091	-2.8091	-2.8091	-2.8091	-2.8091	-2.8091	-2.8091	-2.8091	-2.8091	-2.8091	-2.8091	-2.8091	-2.8091	-2.8091	-0.912094	-2.8091	-2.8091	-2.8091	-2.8091	-2.8091	-2.8091	-2.8091
rno-piR-10829	-2.8091	-2.8091	-1.37586	-2.8091	-2.8091	-2.8091	-2.8091	-2.8091	-2.8091	-2.8091	-2.8091	-2.8091	-2.8091	-2.8091	-2.8091	-2.8091	-0.912094	-2.8091	0.838007	-2.8091	-2.8091	-2.8091	-2.8091	-2.8091
rno-piR-1083	-2.8091	-2.8091	-1.9595	-2.8091	-2.8091	-2.8091	-2.8091	-2.8091	-2.8091	-2.8091	-2.8091	-2.8091	-2.8091	-2.8091	-2.8091	-2.8091	-2.8091	-2.8091	-2.8091	-2.8091	-2.8091	-2.8091	-2.8091	-2.8091
rno-piR-10830	-2.8091	-2.8091	-2.8091	-2.8091	-2.8091	0.338593	-2.8091	-2.8091	-2.8091	-2.8091	-2.8091	-2.8091	-2.8091	-2.8091	-2.8091	-2.8091	-2.8091	-0.401497	-2.8091	-2.8091	-2.8091	-2.8091	-2.8091	-2.8091
rno-piR-10831	-2.8091	-2.8091	-0.851482	-2.8091	-2.8091	-2.8091	-2.8091	-2.8091	-2.8091	-2.8091	-2.8091	-2.8091	-2.8091	-2.8091	-2.8091	-2.8091	-2.8091	-2.8091	-2.8091	-2.8091	-2.8091	-2.8091	-2.8091	-2.8091
rno-piR-10832	1.05817	-2.8091	-2.8091	-2.8091	-2.8091	-2.8091	-2.8091	-2.8091	-2.8091	-0.291042	-2.8091	-2.8091	-2.8091	-2.8091	-2.8091	-2.8091	-2.8091	-0.401497	0.0317522	-0.305325	-2.8091	-2.8091	-2.8091	-2.8091
rno-piR-10834	-2.8091	-0.640445	-2.8091	-2.8091	-2.8091	-2.8091	-2.8091	-2.8091	-2.8091	-2.8091	-2.8091	-2.8091	-2.8091	-2.8091	-2.8091	-2.8091	-2.8091	-2.8091	-2.8091	-2.8091	-2.8091	-2.8091	-2.8091	-2.8091
rno-piR-10835	-2.8091	-2.8091	-1.62376	-2.8091	-2.8091	-2.8091	-2.8091	-2.8091	-2.8091	-2.8091	1.01527	-2.8091	-2.8091	-2.8091	-2.8091	-2.8091	-2.8091	-0.401497	-2.8091	-2.8091	-2.8091	-2.8091	-2.8091	-2.8091
rno-piR-10836	-2.8091	-2.8091	-1.62376	-2.8091	-2.8091	-2.8091	-2.8091	-2.8091	-2.8091	-2.8091	-2.8091	-2.8091	-2.8091	-2.8091	-2.8091	-2.8091	-0.912094	-2.8091	-2.8091	2.78052	-2.8091	-2.8091	-2.8091	-2.8091
rno-piR-10837	4.59832	4.85738	6.57626	4.96078	5.49245	5.04998	2.94032	0.646749	2.2881	1.61494	-2.8091	2.03091	7.26602	5.26713	3.43517	3.24624	5.74037	6.05741	2.48009	1.30646	-2.8091	4.37741	-2.8091	-2.8091
rno-piR-10840	-2.8091	-2.8091	-2.8091	-2.8091	-0.691621	-2.8091	-2.8091	-2.8091	-2.8091	-2.8091	-2.8091	-2.8091	-2.8091	-2.8091	-2.8091	-2.8091	-2.8091	-2.8091	-2.8091	-2.8091	-2.8091	-2.8091	-2.8091	-2.8091
rno-piR-10841	-2.8091	-2.8091	-2.8091	-2.8091	-2.8091	-2.8091	-2.8091	-2.8091	-2.8091	-2.8091	-2.8091	-2.8091	-2.8091	-2.8091	-2.8091	-2.8091	-2.8091	-2.8091	0.0317522	-2.8091	-2.8091	-2.8091	-2.8091	-2.8091
rno-piR-10842	1.34239	-2.8091	0.244802	0.290504	-0.00243066	0.338593	2.54268	3.41002	-2.8091	3.77065	1.9153	-2.8091	-2.8091	0.570591	-2.8091	-2.8091	-0.269622	-0.401497	1.72527	-2.8091	-2.8091	2.65797	-2.8091	-2.8091
rno-piR-10843	-2.8091	-2.8091	-1.37586	-2.8091	-2.8091	-2.8091	-2.8091	-2.8091	-2.8091	-2.8091	-2.8091	-2.8091	-2.8091	-2.8091	-2.8091	-2.8091	-0.912094	-2.8091	-2.8091	-2.8091	-2.8091	-2.8091	-2.8091	-2.8091
rno-piR-10844	-2.8091	-2.8091	-1.17414	-2.8091	-0.691621	-2.8091	-2.8091	-2.8091	-2.8091	-2.8091	-2.8091	-2.8091	-2.8091	-2.8091	-2.8091	-2.8091	-2.8091	-0.401497	-2.8091	-2.8091	-2.8091	-2.8091	-2.8091	-2.8091
rno-piR-10845	-2.8091	-2.8091	-2.8091	-2.8091	-2.8091	-0.403412	-2.8091	-2.8091	-2.8091	-2.8091	-2.8091	-2.8091	-2.8091	-0.857667	-2.8091	-2.8091	-2.8091	-2.8091	-2.8091	-2.8091	-2.8091	-2.8091	2.82617	-2.8091
rno-piR-10846	-2.8091	-1.21021	-1.37586	-0.817012	-2.8091	-0.403412	1.99161	-2.8091	-2.8091	-2.8091	-2.8091	-2.8091	-2.8091	-0.857667	-2.8091	-2.8091	-0.269622	-2.8091	0.0317522	-2.8091	-2.8091	-2.8091	-2.8091	-2.8091
rno-piR-10847	-0.497571	-1.21021	-1.00219	-0.817012	0.454729	-0.403412	-2.8091	-2.8091	-2.8091	-2.8091	-2.8091	-2.8091	-2.8091	-0.857667	-2.8091	-2.8091	-0.269622	-0.401497	-2.8091	-2.8091	-2.8091	-2.8091	-2.8091	0.944813
rno-piR-1085	-2.8091	-1.21021	-1.9595	-2.8091	-2.8091	-2.8091	-2.8091	-2.8091	-2.8091	-2.8091	-2.8091	-2.8091	-2.8091	-2.8091	-2.8091	-2.8091	-2.8091	-0.401497	-2.8091	-2.8091	-2.8091	-2.8091	-2.8091	-2.8091
rno-piR-10851	-0.497571	-1.21021	-1.9595	-2.8091	-0.691621	-0.403412	-2.8091	-2.8091	-2.8091	-2.8091	-2.8091	-2.8091	-2.8091	-2.8091	-2.8091	-2.8091	-2.8091	-2.8091	-2.8091	-2.8091	-2.8091	-2.8091	-2.8091	-2.8091
rno-piR-10853	-2.8091	-2.8091	-1.62376	-2.8091	-2.8091	-2.8091	-2.8091	-2.8091	-2.8091	1.61494	-2.8091	-2.8091	-2.8091	-2.8091	-2.8091	-2.8091	-2.8091	-2.8091	-2.8091	-2.8091	-2.8091	-2.8091	-2.8091	-2.8091
rno-piR-10854	-2.8091	-1.21021	-2.8091	-2.8091	-2.8091	-0.403412	-2.8091	-2.8091	-2.8091	-2.8091	-2.8091	-2.8091	-2.8091	-2.8091	-2.8091	-2.8091	-2.8091	-2.8091	0.0317522	4.24427	-2.8091	-2.8091	-2.8091	-2.8091
rno-piR-10855	-2.8091	-2.8091	-1.9595	-2.8091	-2.8091	-2.8091	-2.8091	-2.8091	-2.8091	-2.8091	-2.8091	-2.8091	-2.8091	-0.203124	-2.8091	-2.8091	-2.8091	-2.8091	-2.8091	-2.8091	-2.8091	-2.8091	-2.8091	-2.8091
rno-piR-10857	-0.497571	-2.8091	-2.8091	-0.817012	-0.691621	-0.403412	-2.8091	-2.8091	-2.8091	-2.8091	3.17201	-2.8091	-2.8091	-2.8091	-2.8091	-2.8091	-2.8091	-2.8091	-2.8091	2.66031	-2.8091	-2.8091	-2.8091	-2.8091
rno-piR-10858	-0.497571	-2.8091	-2.8091	-2.8091	-2.8091	0.338593	-2.8091	-2.8091	-2.8091	-2.8091	3.6445	-2.8091	-2.8091	0.236575	-2.8091	2.43186	-0.912094	-2.8091	-2.8091	-2.8091	-2.8091	-2.8091	-2.8091	-2.8091
rno-piR-10859	-2.8091	-2.8091	-2.8091	-2.8091	-2.8091	-2.8091	-2.8091	-2.8091	-2.8091	-2.8091	-2.8091	-2.8091	-2.8091	-2.8091	-2.8091	-2.8091	-2.8091	-2.8091	-2.8091	-2.8091	-2.8091	1.96264	-2.8091	-2.8091
rno-piR-1086	2.39229	1.75805	2.05351	2.86416	1.07661	0.821078	5.14576	4.09565	-2.8091	2.91107	-2.8091	-2.8091	-2.8091	0.570591	-2.8091	-2.8091	1.50456	1.70961	2.82654	4.70542	-2.8091	5.08954	-2.8091	-2.8091
rno-piR-10860	1.34239	-2.8091	-1.37586	-2.8091	-0.691621	-0.403412	-2.8091	-2.8091	-2.8091	-2.8091	-2.8091	-2.8091	-2.8091	-2.8091	-2.8091	-2.8091	-0.269622	-2.8091	0.0317522	-2.8091	-2.8091	-2.8091	-2.8091	-2.8091
rno-piR-10861	1.05817	-2.8091	-0.851482	-0.153685	-0.691621	-0.403412	-2.8091	-2.8091	-2.8091	-2.8091	-2.8091	-2.8091	-2.8091	-2.8091	3.43517	-2.8091	-2.8091	-2.8091	-2.8091	-2.8091	-2.8091	-2.8091	-2.8091	-2.8091
rno-piR-10862	-2.8091	-2.8091	-1.9595	-2.8091	-0.691621	-2.8091	-2.8091	-2.8091	-2.8091	-2.8091	-2.8091	-2.8091	-2.8091	-2.8091	-2.8091	-2.8091	-2.8091	-2.8091	-2.8091	-2.8091	-2.8091	0.563112	-2.8091	-2.8091
rno-piR-10863	-2.8091	-2.8091	-1.17414	-2.8091	-2.8091	-0.403412	-2.8091	-2.8091	-2.8091	-0.291042	-2.8091	-2.8091	-2.8091	-2.8091	-2.8091	-2.8091	-2.8091	-2.8091	-2.8091	1.83752	-2.8091	-2.8091	-2.8091	-2.8091
rno-piR-10867	-2.8091	-1.21021	-0.851482	-0.153685	-0.00243066	-2.8091	-2.8091	-2.8091	-2.8091	-2.8091	-2.8091	-2.8091	-2.8091	0.570591	-2.8091	-2.8091	0.163835	-0.401497	-2.8091	-2.8091	-2.8091	-2.8091	-2.8091	-2.8091
rno-piR-10869	-2.8091	-2.8091	-1.62376	-0.817012	-0.691621	-2.8091	-2.8091	-2.8091	-2.8091	-2.8091	-2.8091	-2.8091	-2.8091	-2.8091	-2.8091	-2.8091	-2.8091	-2.8091	0.838007	-2.8091	-2.8091	-2.8091	-2.8091	-2.8091
rno-piR-10870	-2.8091	-2.8091	-2.8091	-0.817012	-0.691621	-2.8091	-2.8091	-2.8091	-2.8091	0.469226	-2.8091	2.03091	-2.8091	-2.8091	-2.8091	-2.8091	-2.8091	-2.8091	-2.8091	2.78052	-2.8091	-2.8091	-2.8091	-2.8091
rno-piR-10871	-2.8091	-1.21021	0.244802	-0.817012	-0.691621	-0.403412	-2.8091	-2.8091	-2.8091	-2.8091	-2.8091	-2.8091	-2.8091	-0.203124	-2.8091	-2.8091	-2.8091	-2.8091	0.0317522	-2.8091	-2.8091	-2.8091	-2.8091	4.64598
rno-piR-10875	1.34239	-2.8091	-0.483425	1.12746	-0.00243066	-2.8091	1.99161	-2.8091	3.24626	-0.291042	-2.8091	-2.8091	-2.8091	-0.857667	-2.8091	-2.8091	0.163835	0.340829	2.26962	2.22447	-2.8091	-2.8091	2.82617	-2.8091
rno-piR-10876	-2.8091	-2.8091	0.180423	-0.817012	0.454729	-0.403412	1.08683	-2.8091	-2.8091	-2.8091	-2.8091	5.26105	-2.8091	-0.857667	-2.8091	-2.8091	-0.912094	-2.8091	-2.8091	1.5964	-2.8091	-2.8091	-2.8091	-2.8091
rno-piR-10878	-2.8091	-2.8091	-0.380507	-0.153685	-0.691621	-2.8091	-2.8091	-2.8091	-2.8091	-2.8091	-2.8091	-2.8091	-2.8091	-2.8091	-2.8091	-2.8091	-0.912094	-2.8091	-2.8091	-2.8091	-2.8091	-2.8091	-2.8091	-2.8091
rno-piR-10879	-2.8091	-2.8091	-1.17414	-2.8091	-2.8091	-2.8091	-2.8091	-2.8091	-2.8091	-2.8091	-2.8091	-2.8091	-2.8091	-2.8091	-2.8091	-2.8091	-2.8091	-2.8091	-2.8091	-2.8091	-2.8091	-2.8091	-2.8091	-2.8091
rno-piR-10880	-2.8091	-2.8091	-1.9595	-0.817012	-2.8091	-2.8091	-2.8091	-2.8091	-2.8091	-2.8091	-2.8091	-2.8091	-2.8091	-2.8091	-2.8091	-2.8091	-2.8091	-2.8091	-2.8091	-2.8091	-2.8091	-2.8091	-2.8091	-2.8091
rno-piR-10881	-2.8091	-1.21021	-0.716865	-2.8091	-0.691621	-0.403412	-2.8091	-2.8091	-2.8091	-2.8091	-2.8091	-2.8091	-2.8091	-0.203124	-2.8091	-2.8091	-2.8091	-2.8091	0.0317522	-2.8091	-2.8091	-2.8091	-2.8091	-2.8091
rno-piR-10882	-0.497571	-2.8091	-2.8091	-2.8091	-2.8091	-2.8091	-2.8091	-2.8091	-2.8091	-2.8091	-2.8091	-2.8091	-2.8091	-2.8091	-2.8091	-2.8091	-2.8091	-2.8091	-2.8091	-2.8091	-2.8091	-2.8091	-2.8091	-2.8091
rno-piR-10883	-2.8091	-1.21021	-1.9595	-2.8091	-2.8091	-0.403412	-2.8091	-2.8091	-2.8091	-2.8091	-2.8091	-2.8091	-2.8091	0.236575	-2.8091	-2.8091	-0.912094	-2.8091	-2.8091	-2.8091	-2.8091	-2.8091	-2.8091	-2.8091
rno-piR-10885	-2.8091	-2.8091	0.0420094	-2.8091	-0.00243066	0.821078	-2.8091	-2.8091	-2.8091	-2.8091	-2.8091	-2.8091	-2.8091	0.570591	-2.8091	-2.8091	-2.8091	-0.401497	-2.8091	-2.8091	-2.8091	-2.8091	-2.8091	-2.8091
rno-piR-10888	-2.8091	-1.21021	-2.8091	-2.8091	-2.8091	-2.8091	-2.8091	-2.8091	-2.8091	-2.8091	-2.8091	-2.8091	-2.8091	-2.8091	-2.8091	-2.8091	-2.8091	-0.401497	-2.8091	5.03027	-2.8091	-2.8091	-2.8091	-2.8091
rno-piR-10889	1.34239	-2.8091	-2.8091	-0.817012	-0.691621	0.338593	-2.8091	0.646749	-2.8091	-2.8091	-2.8091	-2.8091	-2.8091	-0.857667	-2.8091	-2.8091	-2.8091	-2.8091	0.0317522	-2.8091	-2.8091	0.563112	-2.8091	-2.8091
rno-piR-10893	0.228153	0.308753	1.88447	3.70137	0.454729	-0.403412	1.08683	0.646749	2.2881	-0.291042	-2.8091	-2.8091	-2.8091	2.17888	-2.8091	-2.8091	2.18467	1.70961	0.0317522	4.4755	-2.8091	2.65797	-2.8091	-2.8091
rno-piR-10894	0.228153	0.0587823	1.59878	2.24327	0.454729	0.821078	1.08683	-2.8091	5.38236	0.960112	-2.8091	-2.8091	-2.8091	0.840636	-2.8091	-2.8091	1.1807	1.70961	1.72527	3.86386	-2.8091	4.37741	-2.8091	-2.8091
rno-piR-10895	-2.8091	-2.8091	-2.8091	-2.8091	-2.8091	0.338593	-2.8091	-2.8091	-2.8091	-2.8091	-2.8091	-2.8091	-2.8091	-2.8091	-2.8091	-2.8091	-2.8091	-2.8091	-2.8091	-2.8091	-2.8091	-2.8091	-2.8091	-2.8091
rno-piR-10896	-2.8091	-2.8091	-2.8091	-2.8091	-2.8091	-2.8091	-2.8091	-2.8091	-2.8091	-2.8091	-2.8091	-2.8091	-2.8091	-2.8091	-2.8091	2.68242	-2.8091	-2.8091	-2.8091	-2.8091	-2.8091	-2.8091	-2.8091	-2.8091
rno-piR-10898	-2.8091	-2.8091	-1.9595	-2.8091	-2.8091	-2.8091	-2.8091	-2.8091	-2.8091	-2.8091	-2.8091	-2.8091	-2.8091	-2.8091	-2.8091	-2.8091	-2.8091	-2.8091	-2.8091	-2.8091	-2.8091	-2.8091	-2.8091	-2.8091
rno-piR-10899	-2.8091	-2.8091	-2.8091	-2.8091	-0.691621	-2.8091	-2.8091	-2.8091	-2.8091	-2.8091	-2.8091	-2.8091	-2.8091	-0.857667	-2.8091	-2.8091	-2.8091	-0.401497	-2.8091	-2.8091	-2.8091	-2.8091	-2.8091	-2.8091
rno-piR-1090	1.34239	-1.21021	-1.00219	-2.8091	-2.8091	-2.8091	-2.8091	-2.8091	-2.8091	-2.8091	-2.8091	-2.8091	-2.8091	-2.8091	-2.8091	-2.8091	-2.8091	-2.8091	-2.8091	-2.8091	-2.8091	-2.8091	-2.8091	-2.8091
rno-piR-10900	-2.8091	-2.8091	-0.380507	-2.8091	0.79938	-2.8091	-2.8091	-2.8091	-2.8091	-2.8091	-2.8091	-2.8091	-2.8091	-0.857667	-2.8091	-2.8091	0.163835	-0.401497	-2.8091	-2.8091	-2.8091	-2.8091	-2.8091	-2.8091
rno-piR-10901	-0.497571	-2.8091	-0.284903	-0.153685	-0.00243066	0.338593	3.25166	-2.8091	-2.8091	-2.8091	1.01527	-2.8091	-2.8091	-0.203124	-2.8091	0.370133	-0.269622	-0.401497	-2.8091	-2.8091	-2.8091	-2.8091	-2.8091	-2.8091
rno-piR-10903	-2.8091	-1.21021	-0.716865	-0.153685	-2.8091	-2.8091	-2.8091	-2.8091	-2.8091	-2.8091	-2.8091	-2.8091	-2.8091	-0.857667	-2.8091	-2.8091	-2.8091	-2.8091	0.838007	-2.8091	-2.8091	-2.8091	-2.8091	-2.8091
rno-piR-10906	-0.497571	-1.21021	-1.17414	-0.817012	-0.691621	-2.8091	1.99161	-2.8091	-2.8091	-0.291042	-2.8091	-2.8091	-2.8091	-2.8091	-2.8091	-2.8091	-0.912094	-0.401497	-2.8091	-2.8091	-2.8091	-2.8091	-2.8091	-2.8091
rno-piR-10908	-2.8091	-2.8091	-1.9595	-2.8091	-2.8091	-2.8091	-2.8091	-2.8091	-2.8091	-2.8091	-2.8091	-2.8091	-2.8091	-0.857667	-2.8091	-2.8091	-2.8091	-2.8091	-2.8091	-2.8091	-2.8091	-2.8091	-2.8091	-2.8091
rno-piR-10909	1.34239	-0.640445	0.180423	-0.153685	0.454729	-2.8091	-2.8091	-2.8091	-2.8091	-2.8091	-2.8091	-2.8091	-2.8091	-0.857667	-2.8091	-2.8091	-2.8091	0.340829	-2.8091	-2.8091	-2.8091	-2.8091	-2.8091	-2.8091
rno-piR-1091	-2.8091	-2.8091	-2.8091	-2.8091	-0.691621	-2.8091	-2.8091	-2.8091	-2.8091	-2.8091	-2.8091	-2.8091	-2.8091	-0.857667	-2.8091	-2.8091	-0.912094	-2.8091	-2.8091	-2.8091	-2.8091	-2.8091	-2.8091	-2.8091
rno-piR-10910	-0.497571	-2.8091	-0.851482	-2.8091	-0.691621	-0.403412	1.08683	0.646749	-2.8091	3.01414	4.40845	-2.8091	5.19488	-0.857667	-2.8091	1.21556	-0.269622	-0.401497	-2.8091	1.30646	-2.8091	-2.8091	-2.8091	0.944813
rno-piR-10911	-2.8091	-2.8091	-0.716865	-0.153685	0.454729	-0.403412	-2.8091	-2.8091	-2.8091	1.85633	4.14926	2.98098	-2.8091	-2.8091	-2.8091	-2.8091	-2.8091	-2.8091	2.26962	3.18077	-2.8091	-2.8091	-2.8091	-2.8091
rno-piR-10912	-2.8091	-2.8091	-2.8091	-2.8091	-0.691621	-2.8091	-2.8091	-2.8091	-2.8091	-2.8091	-2.8091	-2.8091	-2.8091	-2.8091	-2.8091	-2.8091	-2.8091	-2.8091	-2.8091	-2.8091	-2.8091	-2.8091	-2.8091	-2.8091
rno-piR-10913	-2.8091	-1.21021	-1.9595	-0.817012	-2.8091	-0.403412	-2.8091	-2.8091	-2.8091	-2.8091	-2.8091	-2.8091	-2.8091	-2.8091	-2.8091	-2.8091	-2.8091	-2.8091	-2.8091	-2.8091	-2.8091	-2.8091	-2.8091	-2.8091
rno-piR-10915	-2.8091	-1.21021	-2.8091	-2.8091	-2.8091	-2.8091	-2.8091	-2.8091	-2.8091	-2.8091	-2.8091	-2.8091	-2.8091	-2.8091	-2.8091	0.370133	-2.8091	-2.8091	-2.8091	-2.8091	-2.8091	-2.8091	-2.8091	-2.8091
rno-piR-10916	-2.8091	-2.8091	-1.9595	-2.8091	-2.8091	-2.8091	-2.8091	-2.8091	-2.8091	-2.8091	-2.8091	-2.8091	-2.8091	-2.8091	-2.8091	-2.8091	-2.8091	-2.8091	-2.8091	-2.8091	-2.8091	-2.8091	-2.8091	-2.8091
rno-piR-10918	0.228153	-0.640445	-0.284903	0.627278	0.454729	-0.403412	1.99161	-2.8091	-2.8091	1.61494	-2.8091	5.26105	-2.8091	0.236575	-2.8091	-2.8091	0.163835	-2.8091	0.838007	4.20186	-2.8091	1.96264	-2.8091	3.75329
rno-piR-10919	-2.8091	-2.8091	-0.594968	-2.8091	-0.691621	-2.8091	-2.8091	-2.8091	-2.8091	-2.8091	-2.8091	-2.8091	-2.8091	-0.857667	-2.8091	-2.8091	-0.912094	-2.8091	0.838007	-2.8091	-2.8091	-2.8091	-2.8091	-2.8091
rno-piR-10920	-2.8091	-2.8091	-0.380507	-0.817012	-0.691621	-2.8091	1.08683	-2.8091	-2.8091	-2.8091	-2.8091	-2.8091	-2.8091	-0.203124	-2.8091	-2.8091	-0.912094	-0.401497	-2.8091	1.5964	-2.8091	-2.8091	-2.8091	-2.8091
rno-piR-10921	-2.8091	-2.8091	-0.594968	0.899196	-0.00243066	-2.8091	-2.8091	-2.8091	-2.8091	-2.8091	-2.8091	-2.8091	-2.8091	-0.857667	-2.8091	-2.8091	-0.912094	-2.8091	-2.8091	-2.8091	-2.8091	-2.8091	-2.8091	-2.8091
rno-piR-10923	-2.8091	-2.8091	-1.00219	0.627278	-2.8091	-2.8091	-2.8091	-2.8091	-2.8091	-2.8091	-2.8091	-2.8091	-2.8091	-2.8091	-2.8091	-2.8091	-2.8091	-2.8091	-2.8091	-2.8091	-2.8091	-2.8091	-2.8091	-2.8091
rno-piR-10925	2.51144	1.3812	0.720831	3.70137	1.50838	2.0914	4.6036	2.44751	-2.8091	3.51357	2.46457	-2.8091	-2.8091	1.43551	4.41621	1.74324	-0.912094	-2.8091	4.52284	7.21459	-2.8091	5.32475	-2.8091	-2.8091
rno-piR-10926	-2.8091	-2.8091	-2.8091	-2.8091	-0.691621	-2.8091	-2.8091	-2.8091	-2.8091	-2.8091	-2.8091	-2.8091	-2.8091	-2.8091	-2.8091	-2.8091	-2.8091	-2.8091	-2.8091	-2.8091	-2.8091	-2.8091	-2.8091	-2.8091
rno-piR-10927	-2.8091	0.0587823	0.765054	-2.8091	-0.691621	1.18072	3.50757	-2.8091	-2.8091	-2.8091	-2.8091	-2.8091	-2.8091	-0.203124	-2.8091	-2.8091	-0.912094	0.823464	0.0317522	-2.8091	-2.8091	-2.8091	-2.8091	-2.8091
rno-piR-10929	-0.497571	-2.8091	-1.62376	-2.8091	-0.00243066	-0.403412	-2.8091	-2.8091	-2.8091	0.469226	1.01527	3.95503	-2.8091	-2.8091	-2.8091	-2.8091	-0.269622	-2.8091	-2.8091	2.52915	-2.8091	0.563112	-2.8091	-2.8091
rno-piR-10931	-2.8091	-2.8091	-1.62376	-2.8091	-0.691621	-0.403412	-2.8091	-2.8091	-2.8091	1.32461	-2.8091	-2.8091	-2.8091	-2.8091	-2.8091	-2.8091	-2.8091	-2.8091	0.838007	2.22447	-2.8091	-2.8091	-2.8091	-2.8091
rno-piR-10933	-2.8091	-2.8091	-0.851482	-2.8091	-2.8091	-2.8091	-2.8091	-2.8091	-2.8091	-2.8091	-2.8091	-2.8091	-2.8091	-0.203124	-2.8091	-2.8091	-2.8091	1.18319	-2.8091	-2.8091	-2.8091	-2.8091	-2.8091	-2.8091
rno-piR-10934	-2.8091	-2.8091	-1.17414	-2.8091	-2.8091	0.338593	-2.8091	-2.8091	-2.8091	-2.8091	-2.8091	-2.8091	-2.8091	-2.8091	-2.8091	-2.8091	-0.269622	-2.8091	-2.8091	-2.8091	-2.8091	-2.8091	-2.8091	-2.8091
rno-piR-10939	-2.8091	-1.21021	-1.00219	-2.8091	-0.691621	-2.8091	-2.8091	-2.8091	-2.8091	-2.8091	-2.8091	-2.8091	-2.8091	-0.203124	-2.8091	-2.8091	-2.8091	-2.8091	0.0317522	-2.8091	-2.8091	-2.8091	-2.8091	-2.8091
rno-piR-1094	-2.8091	0.308753	0.92937	1.32426	1.68365	-2.8091	4.08054	-2.8091	-2.8091	2.24363	-2.8091	-2.8091	-2.8091	-0.203124	-2.8091	-2.8091	0.163835	1.18319	2.48009	-2.8091	-2.8091	-2.8091	-2.8091	-2.8091
rno-piR-10941	-2.8091	-2.8091	-1.9595	-2.8091	-2.8091	-2.8091	1.08683	-2.8091	-2.8091	-2.8091	4.52245	-2.8091	-2.8091	0.236575	-2.8091	-2.8091	-2.8091	-2.8091	-2.8091	-2.8091	-2.8091	-2.8091	-2.8091	-2.8091
rno-piR-10942	-2.8091	-2.8091	-2.8091	-2.8091	-2.8091	-2.8091	-2.8091	-2.8091	-2.8091	-2.8091	-2.8091	-2.8091	-2.8091	-2.8091	-2.8091	-2.8091	-2.8091	-2.8091	0.838007	-2.8091	-2.8091	-2.8091	-2.8091	-2.8091
rno-piR-10944	-2.8091	-2.8091	-1.9595	-2.8091	-2.8091	-2.8091	-2.8091	-2.8091	-2.8091	-2.8091	-2.8091	-2.8091	-2.8091	-2.8091	-2.8091	-2.8091	-2.8091	-2.8091	-2.8091	-2.8091	-2.8091	-2.8091	-2.8091	-2.8091
rno-piR-10945	-2.8091	-2.8091	-1.62376	-2.8091	-2.8091	-2.8091	-2.8091	-2.8091	-2.8091	-2.8091	-2.8091	-2.8091	-2.8091	-2.8091	-2.8091	-2.8091	-2.8091	-2.8091	-2.8091	-2.8091	-2.8091	-2.8091	-2.8091	-2.8091
rno-piR-10947	-2.8091	-2.8091	-1.37586	-0.817012	0.454729	-0.403412	-2.8091	-2.8091	-2.8091	-2.8091	-2.8091	-2.8091	-2.8091	-2.8091	-2.8091	-2.8091	-0.269622	-0.401497	-2.8091	-2.8091	-2.8091	-2.8091	-2.8091	-2.8091
rno-piR-10948	-2.8091	-1.21021	-1.9595	-0.153685	-0.691621	0.338593	-2.8091	2.05668	-2.8091	-2.8091	1.01527	-2.8091	-2.8091	-0.203124	-2.8091	1.21556	-2.8091	-0.401497	0.0317522	0.45269	-2.8091	3.125	-2.8091	4.32813
rno-piR-10949	-2.8091	-2.8091	-1.9595	-2.8091	-2.8091	-2.8091	-2.8091	-2.8091	-2.8091	-2.8091	2.86126	2.03091	-2.8091	-2.8091	-2.8091	-2.8091	-2.8091	-2.8091	-2.8091	-2.8091	-2.8091	-2.8091	-2.8091	-2.8091
rno-piR-1095	-2.8091	-2.8091	-1.9595	-2.8091	-2.8091	-2.8091	-2.8091	-2.8091	-2.8091	-2.8091	-2.8091	-2.8091	-2.8091	-2.8091	-2.8091	-2.8091	-2.8091	-2.8091	-2.8091	-2.8091	-2.8091	-2.8091	-2.8091	-2.8091
rno-piR-10950	-2.8091	-1.21021	-1.9595	-2.8091	-2.8091	-2.8091	1.08683	-2.8091	-2.8091	-2.8091	3.17201	-2.8091	-2.8091	-0.857667	-2.8091	-2.8091	-2.8091	-2.8091	-2.8091	-2.8091	-2.8091	0.563112	-2.8091	-2.8091
rno-piR-10951	-2.8091	-2.8091	-1.37586	-2.8091	-0.691621	0.338593	3.50757	-2.8091	-2.8091	-2.8091	-2.8091	-2.8091	-2.8091	-2.8091	-2.8091	-2.8091	-2.8091	-0.401497	-2.8091	-2.8091	-2.8091	-2.8091	-2.8091	-2.8091
rno-piR-10952	2.26239	1.3812	1.96206	3.47241	2.85784	3.12808	5.48038	3.57569	-2.8091	5.5043	4.62809	5.11023	5.5404	1.06754	-2.8091	4.51016	1.1807	1.47041	3.94674	7.98212	6.45848	5.44943	1.88149	2.78304
rno-piR-10953	-0.497571	-0.246323	0.84958	1.32426	1.07661	0.338593	3.25166	-2.8091	-2.8091	-2.8091	-2.8091	-2.8091	-2.8091	0.236575	-2.8091	-2.8091	1.1807	0.340829	2.48009	4.06657	-2.8091	3.99642	-2.8091	-2.8091
rno-piR-10954	-2.8091	-2.8091	-2.8091	-2.8091	-2.8091	-2.8091	-2.8091	-2.8091	-2.8091	-2.8091	-2.8091	-2.8091	-2.8091	-2.8091	-2.8091	-2.8091	-2.8091	-2.8091	-2.8091	-2.8091	-2.8091	-2.8091	3.39198	-2.8091
rno-piR-10955	-2.8091	-2.8091	-1.9595	-0.817012	-2.8091	-2.8091	-2.8091	-2.8091	-2.8091	-2.8091	-2.8091	-2.8091	-2.8091	-2.8091	-2.8091	-2.8091	-2.8091	-2.8091	-2.8091	-2.8091	4.15506	1.42735	-2.8091	-2.8091
rno-piR-10957	-2.8091	-2.8091	-1.9595	-2.8091	-0.691621	-2.8091	-2.8091	-2.8091	-2.8091	-2.8091	-2.8091	-2.8091	-2.8091	-2.8091	-2.8091	-2.8091	-2.8091	-2.8091	-2.8091	-2.8091	-2.8091	-2.8091	-2.8091	-2.8091
rno-piR-10958	-2.8091	-2.8091	-2.8091	-2.8091	-2.8091	-0.403412	-2.8091	-2.8091	-2.8091	-2.8091	-2.8091	-2.8091	-2.8091	-0.857667	-2.8091	-2.8091	-2.8091	-2.8091	-2.8091	-2.8091	-2.8091	-2.8091	-2.8091	-2.8091
rno-piR-10959	-2.8091	-2.8091	-1.9595	-2.8091	-2.8091	-2.8091	-2.8091	-2.8091	-2.8091	-2.8091	-2.8091	-2.8091	-2.8091	-2.8091	-2.8091	-2.8091	-2.8091	-2.8091	-2.8091	-2.8091	-2.8091	-2.8091	-2.8091	-2.8091
rno-piR-1096	-2.8091	-2.8091	-0.716865	-2.8091	-2.8091	-2.8091	-2.8091	-2.8091	-2.8091	-2.8091	-2.8091	-2.8091	-2.8091	-2.8091	-2.8091	-2.8091	-0.912094	-2.8091	-2.8091	-2.8091	-2.8091	-2.8091	-2.8091	-2.8091
rno-piR-10960	-2.8091	-2.8091	-1.62376	-2.8091	-2.8091	-2.8091	-2.8091	-2.8091	-2.8091	-2.8091	-2.8091	-2.8091	-2.8091	-2.8091	-2.8091	-2.8091	-2.8091	-2.8091	-2.8091	-2.8091	-2.8091	-2.8091	-2.8091	-2.8091
rno-piR-10961	-2.8091	-2.8091	-1.9595	-2.8091	0.454729	-0.403412	-2.8091	-2.8091	-2.8091	3.44144	5.3378	2.98098	-2.8091	-2.8091	-2.8091	-2.8091	-2.8091	-0.401497	1.34924	5.37377	-2.8091	-2.8091	-2.8091	-2.8091
rno-piR-10963	-2.8091	-2.8091	-1.17414	-0.817012	-2.8091	-0.403412	-2.8091	-2.8091	-2.8091	-2.8091	-2.8091	-2.8091	-2.8091	-2.8091	-2.8091	-2.8091	-2.8091	-0.401497	-2.8091	1.83752	-2.8091	-2.8091	-2.8091	-2.8091
rno-piR-10964	-2.8091	-2.8091	-2.8091	-2.8091	-2.8091	-2.8091	-2.8091	-2.8091	-2.8091	-2.8091	-2.8091	-2.8091	-2.8091	-2.8091	-2.8091	-2.8091	-2.8091	-2.8091	-2.8091	-2.8091	-2.8091	-2.8091	-2.8091	3.34827
rno-piR-10965	1.34239	0.0587823	1.00493	-0.153685	1.07661	0.338593	-2.8091	-2.8091	-2.8091	0.469226	-2.8091	-2.8091	-2.8091	1.06754	-2.8091	-2.8091	0.986392	1.18319	-2.8091	-2.8091	-2.8091	-2.8091	-2.8091	-2.8091
rno-piR-10967	-0.497571	-2.8091	-1.9595	-2.8091	-2.8091	-2.8091	-2.8091	-2.8091	-2.8091	-2.8091	-2.8091	-2.8091	-2.8091	-2.8091	-2.8091	-2.8091	-2.8091	-2.8091	-2.8091	-2.8091	-2.8091	-2.8091	-2.8091	-2.8091
rno-piR-10968	-0.497571	-0.640445	-0.851482	-2.8091	-0.691621	-0.403412	-2.8091	-2.8091	-2.8091	-2.8091	-2.8091	-2.8091	-2.8091	-2.8091	-2.8091	-2.8091	-0.269622	-2.8091	-2.8091	-2.8091	-2.8091	-2.8091	-2.8091	-2.8091
rno-piR-10969	-2.8091	0.0587823	-0.0327353	0.899196	-0.691621	-0.403412	-2.8091	-2.8091	-2.8091	-2.8091	-2.8091	-2.8091	-2.8091	-2.8091	-2.8091	-2.8091	-0.269622	-2.8091	0.0317522	-2.8091	-2.8091	-2.8091	-2.8091	3.75329
rno-piR-10971	-2.8091	-1.21021	-0.483425	-0.817012	-2.8091	-2.8091	-2.8091	-2.8091	-2.8091	-2.8091	-2.8091	-2.8091	-2.8091	-2.8091	-2.8091	-2.8091	-0.912094	-2.8091	-2.8091	-2.8091	-2.8091	-2.8091	-2.8091	-2.8091
rno-piR-10972	-2.8091	-2.8091	-1.9595	-2.8091	-2.8091	-2.8091	-2.8091	-2.8091	-2.8091	-2.8091	-2.8091	-2.8091	-2.8091	-2.8091	-2.8091	-2.8091	-2.8091	-2.8091	-2.8091	-2.8091	-2.8091	-2.8091	-2.8091	-2.8091
rno-piR-10973	-2.8091	-2.8091	-2.8091	-2.8091	-2.8091	-2.8091	-2.8091	-2.8091	-2.8091	-2.8091	-2.8091	2.03091	-2.8091	-2.8091	-2.8091	-2.8091	-2.8091	-2.8091	-2.8091	-2.8091	-2.8091	-2.8091	-2.8091	-2.8091
rno-piR-10974	-2.8091	-2.8091	-1.9595	-2.8091	-2.8091	-2.8091	-2.8091	-2.8091	-2.8091	-2.8091	-2.8091	-2.8091	-2.8091	-2.8091	-2.8091	-2.8091	-2.8091	-2.8091	-2.8091	-2.8091	-2.8091	-2.8091	-2.8091	-2.8091
rno-piR-10975	-2.8091	-2.8091	-1.9595	-2.8091	-2.8091	-2.8091	-2.8091	-2.8091	-2.8091	-2.8091	-2.8091	-2.8091	-2.8091	-2.8091	-2.8091	-2.8091	-2.8091	0.340829	-2.8091	-2.8091	-2.8091	-2.8091	-2.8091	-2.8091
rno-piR-10976	0.702996	0.520875	1.04127	1.9181	0.454729	-0.403412	3.25166	-2.8091	-2.8091	-0.291042	-2.8091	-2.8091	-2.8091	1.43551	-2.8091	-2.8091	1.99163	0.340829	-2.8091	-2.8091	-2.8091	-2.8091	-2.8091	-2.8091
rno-piR-10977	-2.8091	-2.8091	-2.8091	-2.8091	-2.8091	-2.8091	-2.8091	-2.8091	-2.8091	-2.8091	-2.8091	-2.8091	-2.8091	-0.857667	-2.8091	-2.8091	-2.8091	-2.8091	-2.8091	-2.8091	-2.8091	-2.8091	-2.8091	-2.8091
rno-piR-10978	-2.8091	-0.246323	-1.62376	-2.8091	-2.8091	-2.8091	-2.8091	-2.8091	-2.8091	-2.8091	-2.8091	-2.8091	-2.8091	-2.8091	-2.8091	-2.8091	-0.269622	-2.8091	-2.8091	-2.8091	-2.8091	-2.8091	-2.8091	-2.8091
rno-piR-10982	-2.8091	-0.640445	-0.851482	-2.8091	-0.691621	0.821078	-2.8091	4.20085	-2.8091	-2.8091	-2.8091	-2.8091	-2.8091	-2.8091	-2.8091	-2.8091	-2.8091	0.823464	-2.8091	2.89147	-2.8091	-2.8091	-2.8091	-2.8091
rno-piR-10985	-2.8091	-1.21021	-1.62376	-2.8091	-0.691621	-2.8091	-2.8091	-2.8091	-2.8091	-2.8091	-2.8091	-2.8091	-2.8091	-2.8091	-2.8091	-2.8091	-2.8091	-0.401497	-2.8091	-2.8091	-2.8091	-2.8091	-2.8091	-2.8091
rno-piR-10986	-2.8091	-2.8091	-1.17414	-2.8091	-2.8091	-2.8091	-2.8091	-2.8091	-2.8091	-2.8091	-2.8091	-2.8091	-2.8091	-2.8091	-2.8091	-2.8091	-2.8091	-2.8091	-2.8091	-2.8091	-2.8091	-2.8091	-2.8091	-2.8091
rno-piR-10991	-2.8091	-2.8091	-2.8091	-2.8091	-2.8091	-2.8091	-2.8091	-2.8091	-2.8091	-2.8091	-2.8091	-2.8091	-2.8091	-2.8091	-2.8091	-2.8091	-2.8091	-0.401497	-2.8091	-2.8091	-2.8091	-2.8091	-2.8091	-2.8091
rno-piR-10992	-2.8091	-2.8091	-2.8091	-2.8091	-2.8091	-2.8091	-2.8091	-2.8091	-2.8091	-2.8091	-2.8091	-2.8091	-2.8091	-2.8091	-2.8091	-2.8091	-2.8091	-2.8091	-2.8091	0.942549	-2.8091	-2.8091	-2.8091	-2.8091
rno-piR-10993	-2.8091	-2.8091	-1.62376	-2.8091	-2.8091	-2.8091	-2.8091	-2.8091	-2.8091	-2.8091	-2.8091	-2.8091	-2.8091	-2.8091	-2.8091	-2.8091	-2.8091	-2.8091	-2.8091	-2.8091	-2.8091	-2.8091	-2.8091	-2.8091
rno-piR-10994	-2.8091	-2.8091	-1.37586	-0.817012	-2.8091	0.338593	-2.8091	-2.8091	-2.8091	-2.8091	-2.8091	-2.8091	-2.8091	-2.8091	-2.8091	-2.8091	0.493989	-0.401497	-2.8091	-2.8091	-2.8091	-2.8091	-2.8091	-2.8091
rno-piR-10997	-2.8091	-2.8091	-1.37586	-0.817012	-2.8091	-2.8091	-2.8091	-2.8091	-2.8091	-2.8091	-2.8091	-2.8091	-2.8091	-2.8091	-2.8091	-2.8091	-2.8091	-2.8091	-2.8091	-2.8091	-2.8091	-2.8091	-2.8091	-2.8091
rno-piR-10998	-2.8091	-2.8091	-2.8091	-2.8091	-2.8091	-2.8091	-2.8091	-2.8091	-2.8091	-2.8091	-2.8091	-2.8091	-2.8091	-2.8091	-2.8091	-2.8091	-2.8091	-2.8091	-2.8091	1.5964	-2.8091	-2.8091	-2.8091	-2.8091
rno-piR-10999	-2.8091	-2.8091	-1.9595	-2.8091	-2.8091	-0.403412	-2.8091	-2.8091	-2.8091	-0.291042	-2.8091	-2.8091	-2.8091	-2.8091	-2.8091	-2.8091	-2.8091	-2.8091	-2.8091	-2.8091	-2.8091	-2.8091	-2.8091	-2.8091
rno-piR-11	-2.8091	-2.8091	-1.37586	-2.8091	-2.8091	-2.8091	-2.8091	-2.8091	-2.8091	-2.8091	-2.8091	-2.8091	-2.8091	-2.8091	-2.8091	-2.8091	-2.8091	-2.8091	-2.8091	-2.8091	-2.8091	-2.8091	-2.8091	-2.8091
rno-piR-110	-2.8091	-2.8091	-0.851482	-0.817012	-0.691621	-0.403412	1.08683	-2.8091	-2.8091	-2.8091	-2.8091	2.03091	-2.8091	-2.8091	-2.8091	-2.8091	-0.912094	-2.8091	-2.8091	1.83752	-2.8091	-2.8091	-2.8091	-2.8091
rno-piR-1100	-2.8091	-2.8091	-1.37586	-0.817012	-2.8091	-2.8091	-2.8091	-2.8091	-2.8091	-0.291042	-2.8091	-2.8091	-2.8091	-2.8091	-2.8091	-2.8091	-2.8091	-0.401497	-2.8091	-2.8091	-2.8091	3.99642	-2.8091	-2.8091
rno-piR-11000	-2.8091	-1.21021	-2.8091	-2.8091	-2.8091	-2.8091	-2.8091	-2.8091	-2.8091	-2.8091	-2.8091	-2.8091	-2.8091	-2.8091	-2.8091	-2.8091	-2.8091	-2.8091	-2.8091	-2.8091	-2.8091	-2.8091	-2.8091	-2.8091
rno-piR-11001	0.228153	-0.246323	1.30282	-0.817012	0.454729	1.46788	1.99161	2.05668	-2.8091	1.32461	-2.8091	-2.8091	-2.8091	0.840636	-2.8091	-2.8091	0.163835	-0.401497	2.02303	-2.8091	-2.8091	-2.8091	-2.8091	-2.8091
rno-piR-11002	-2.8091	-2.8091	-2.8091	-2.8091	-0.691621	-2.8091	-2.8091	-2.8091	-2.8091	-2.8091	-2.8091	-2.8091	-2.8091	-2.8091	-2.8091	-2.8091	-2.8091	-2.8091	0.0317522	-2.8091	-2.8091	-2.8091	-2.8091	-2.8091
rno-piR-11003	-2.8091	-0.640445	-1.62376	-2.8091	-2.8091	-2.8091	-2.8091	-2.8091	-2.8091	-2.8091	-2.8091	-2.8091	-2.8091	-2.8091	-2.8091	-2.8091	-2.8091	-2.8091	-2.8091	-2.8091	-2.8091	-2.8091	-2.8091	-2.8091
rno-piR-11004	-2.8091	-2.8091	-2.8091	-2.8091	-2.8091	-0.403412	-2.8091	-2.8091	-2.8091	-2.8091	-2.8091	-2.8091	-2.8091	-2.8091	-2.8091	-2.8091	-2.8091	-2.8091	-2.8091	-2.8091	-2.8091	-2.8091	-2.8091	-2.8091
rno-piR-11005	-0.497571	-2.8091	-1.17414	-0.153685	-2.8091	-2.8091	-2.8091	-2.8091	-2.8091	-0.291042	-2.8091	-2.8091	-2.8091	-2.8091	-2.8091	-2.8091	-0.912094	-0.401497	0.0317522	0.45269	-2.8091	-2.8091	-2.8091	-2.8091
rno-piR-11008	-0.497571	-1.21021	0.0420094	-2.8091	1.30869	-2.8091	-2.8091	0.646749	-2.8091	-2.8091	-2.8091	-2.8091	-2.8091	-2.8091	-2.8091	-2.8091	-0.912094	-0.401497	-2.8091	-2.8091	-2.8091	-2.8091	-2.8091	-2.8091
rno-piR-11009	-2.8091	-2.8091	-1.17414	-2.8091	-2.8091	-2.8091	-2.8091	-2.8091	-2.8091	-2.8091	-2.8091	-2.8091	-2.8091	-2.8091	-2.8091	-2.8091	-2.8091	-2.8091	-2.8091	-2.8091	-2.8091	-2.8091	-2.8091	-2.8091
rno-piR-1101	-2.8091	-1.21021	-1.62376	-0.817012	-2.8091	-2.8091	-2.8091	-2.8091	-2.8091	-2.8091	-2.8091	-2.8091	-2.8091	-0.857667	-2.8091	-2.8091	-2.8091	-2.8091	0.0317522	4.82202	-2.8091	-2.8091	-2.8091	-2.8091
rno-piR-11010	-2.8091	-2.8091	-1.62376	-2.8091	-2.8091	-2.8091	-2.8091	-2.8091	-2.8091	-2.8091	-2.8091	-2.8091	-2.8091	-2.8091	-2.8091	-2.8091	-2.8091	-0.401497	-2.8091	-2.8091	-2.8091	-2.8091	-2.8091	-2.8091
rno-piR-11011	-0.497571	-2.8091	0.112934	-0.817012	-0.00243066	-0.403412	-2.8091	-2.8091	-2.8091	-2.8091	-2.8091	-2.8091	-2.8091	-2.8091	-2.8091	-2.8091	-0.269622	-0.401497	-2.8091	-2.8091	-2.8091	-2.8091	-2.8091	-2.8091
rno-piR-11012	-2.8091	-2.8091	-2.8091	-2.8091	-0.691621	-2.8091	-2.8091	-2.8091	-2.8091	-2.8091	-2.8091	-2.8091	-2.8091	-2.8091	-2.8091	-2.8091	-0.912094	-2.8091	-2.8091	-2.8091	-2.8091	-2.8091	-2.8091	-2.8091
rno-piR-11013	-2.8091	-2.8091	-1.9595	-2.8091	-2.8091	-2.8091	-2.8091	-2.8091	-2.8091	-2.8091	-2.8091	2.03091	-2.8091	-2.8091	-2.8091	-2.8091	-2.8091	-2.8091	-2.8091	-2.8091	-2.8091	-2.8091	-2.8091	-2.8091
rno-piR-11014	-2.8091	-2.8091	-1.9595	-2.8091	-2.8091	-2.8091	-2.8091	-2.8091	-2.8091	-2.8091	-2.8091	-2.8091	-2.8091	-0.857667	-2.8091	-2.8091	-2.8091	-2.8091	-2.8091	-2.8091	-2.8091	-2.8091	-2.8091	-2.8091
rno-piR-11016	-2.8091	-2.8091	-1.37586	-2.8091	-2.8091	-0.403412	-2.8091	-2.8091	-2.8091	-2.8091	-2.8091	-2.8091	-2.8091	-2.8091	-2.8091	-2.8091	-2.8091	-2.8091	-2.8091	-2.8091	-2.8091	-2.8091	-2.8091	-2.8091
rno-piR-11017	-2.8091	-2.8091	-1.62376	-2.8091	-2.8091	-2.8091	-2.8091	-2.8091	-2.8091	-2.8091	-2.8091	-2.8091	-2.8091	-2.8091	-2.8091	-2.8091	-2.8091	-2.8091	-2.8091	-2.8091	-2.8091	-2.8091	-2.8091	-2.8091
rno-piR-11019	1.7829	0.705286	2.59386	2.33716	2.10903	2.525	3.91363	-2.8091	5.53338	-2.8091	-2.8091	-2.8091	-2.8091	0.840636	-2.8091	3.08165	2.09138	0.340829	2.26962	-2.8091	-2.8091	-2.8091	-2.8091	-2.8091
rno-piR-1102	-2.8091	-2.8091	-1.37586	-2.8091	-2.8091	-2.8091	-2.8091	-2.8091	-2.8091	-2.8091	-2.8091	-2.8091	-2.8091	-2.8091	-2.8091	-2.8091	-2.8091	-2.8091	-2.8091	-2.8091	-2.8091	-2.8091	-2.8091	-2.8091
rno-piR-11020	-2.8091	-1.21021	-1.62376	-2.8091	-0.00243066	-0.403412	-2.8091	-2.8091	-2.8091	-2.8091	1.01527	-2.8091	-2.8091	-2.8091	-2.8091	-2.8091	-0.912094	-2.8091	-2.8091	-2.8091	-2.8091	-2.8091	-2.8091	-2.8091
rno-piR-11022	-2.8091	-2.8091	-2.8091	-2.8091	-2.8091	-0.403412	-2.8091	-2.8091	-2.8091	-2.8091	-2.8091	-2.8091	-2.8091	-2.8091	-2.8091	-2.8091	-2.8091	-2.8091	-2.8091	-2.8091	-2.8091	-2.8091	-2.8091	-2.8091
rno-piR-11024	-2.8091	-1.21021	-0.380507	-0.817012	-0.00243066	-2.8091	-2.8091	-2.8091	-2.8091	0.469226	-2.8091	-2.8091	-2.8091	-0.857667	-2.8091	-2.8091	-2.8091	-0.401497	1.34924	-2.8091	-2.8091	-2.8091	-2.8091	-2.8091
rno-piR-11025	-2.8091	-2.8091	-2.8091	-2.8091	-2.8091	-2.8091	-2.8091	-2.8091	-2.8091	0.469226	-2.8091	-2.8091	-2.8091	-2.8091	-2.8091	-2.8091	-2.8091	-2.8091	0.0317522	-2.8091	-2.8091	-2.8091	-2.8091	-2.8091
rno-piR-11026	-2.8091	-1.21021	-1.9595	-2.8091	-2.8091	-2.8091	-2.8091	-2.8091	-2.8091	-2.8091	-2.8091	-2.8091	-2.8091	-2.8091	-2.8091	-2.8091	-2.8091	-2.8091	-2.8091	-2.8091	-2.8091	-2.8091	-2.8091	-2.8091
rno-piR-11028	-2.8091	-1.21021	-1.37586	-0.153685	-0.00243066	1.18072	-2.8091	-2.8091	-2.8091	-2.8091	-2.8091	-2.8091	-2.8091	-2.8091	-2.8091	-2.8091	-2.8091	-2.8091	0.0317522	-2.8091	-2.8091	-2.8091	-2.8091	-2.8091
rno-piR-11029	-2.8091	-2.8091	-2.8091	-2.8091	-0.691621	-2.8091	-2.8091	-2.8091	-2.8091	-2.8091	-2.8091	-2.8091	-2.8091	-0.857667	-2.8091	-2.8091	-2.8091	-2.8091	-2.8091	-2.8091	-2.8091	1.96264	-2.8091	-2.8091
rno-piR-1103	-0.497571	-2.8091	-2.8091	-2.8091	-2.8091	-2.8091	-2.8091	-2.8091	-2.8091	-2.8091	-2.8091	-2.8091	-2.8091	-2.8091	-2.8091	-2.8091	-2.8091	-2.8091	-2.8091	-2.8091	-2.8091	-2.8091	-2.8091	-2.8091
rno-piR-11030	-2.8091	-1.21021	-2.8091	-2.8091	-0.691621	-2.8091	-2.8091	-2.8091	-2.8091	-2.8091	-2.8091	-2.8091	-2.8091	-0.857667	-2.8091	-2.8091	-2.8091	-2.8091	-2.8091	4.9299	-2.8091	-2.8091	-2.8091	-2.8091
rno-piR-11033	-2.8091	-2.8091	-1.00219	-0.817012	-2.8091	-2.8091	-2.8091	-2.8091	-2.8091	-2.8091	-2.8091	-2.8091	-2.8091	-0.203124	-2.8091	-2.8091	-2.8091	-2.8091	-2.8091	-2.8091	-2.8091	-2.8091	-2.8091	-2.8091
rno-piR-11034	-2.8091	-2.8091	-1.17414	-2.8091	-0.691621	-2.8091	-2.8091	-2.8091	-2.8091	-2.8091	-2.8091	-2.8091	-2.8091	-2.8091	-2.8091	-2.8091	-2.8091	-2.8091	-2.8091	-2.8091	-2.8091	-2.8091	-2.8091	-2.8091
rno-piR-11037	-2.8091	-0.640445	0.112934	-0.153685	-0.691621	1.18072	1.99161	-2.8091	-2.8091	0.469226	3.42752	2.03091	-2.8091	-0.203124	-2.8091	-2.8091	-0.912094	-2.8091	1.34924	4.43945	-2.8091	1.96264	-2.8091	3.34827
rno-piR-11038	-2.8091	-1.21021	-1.00219	-0.817012	0.454729	-2.8091	-2.8091	-2.8091	-2.8091	-0.291042	-2.8091	-2.8091	-2.8091	-2.8091	-2.8091	-2.8091	-0.912094	-2.8091	0.0317522	2.04396	-2.8091	2.35186	-2.8091	-2.8091
rno-piR-11039	-2.8091	-2.8091	-0.716865	-2.8091	-2.8091	-2.8091	-2.8091	-2.8091	-2.8091	-2.8091	-2.8091	-2.8091	-2.8091	-2.8091	-2.8091	-2.8091	-2.8091	-2.8091	-2.8091	-2.8091	-2.8091	-2.8091	-2.8091	-2.8091
rno-piR-1104	-2.8091	-2.8091	-0.284903	-2.8091	-0.00243066	-2.8091	-2.8091	-2.8091	-2.8091	-2.8091	-2.8091	-2.8091	-2.8091	-0.857667	-2.8091	-2.8091	-0.269622	-2.8091	-2.8091	-2.8091	-2.8091	-2.8091	-2.8091	-2.8091
rno-piR-11040	-2.8091	-2.8091	-1.9595	-2.8091	-2.8091	-2.8091	1.99161	-2.8091	-2.8091	-2.8091	-2.8091	-2.8091	-2.8091	-2.8091	-2.8091	-2.8091	-2.8091	-2.8091	0.0317522	-2.8091	-2.8091	-2.8091	-2.8091	-2.8091
rno-piR-11044	-2.8091	-2.8091	-2.8091	-2.8091	-2.8091	-2.8091	-2.8091	-2.8091	-2.8091	-2.8091	-2.8091	-2.8091	-2.8091	-2.8091	-2.8091	-2.8091	-2.8091	-2.8091	-2.8091	0.942549	-2.8091	-2.8091	-2.8091	-2.8091
rno-piR-11045	-2.8091	-2.8091	-2.8091	-2.8091	-2.8091	-2.8091	-2.8091	-2.8091	-2.8091	-2.8091	-2.8091	-2.8091	-2.8091	-2.8091	-2.8091	-2.8091	-2.8091	-2.8091	0.0317522	-2.8091	-2.8091	-2.8091	-2.8091	-2.8091
rno-piR-11046	-2.8091	-2.8091	-1.62376	-2.8091	-2.8091	-0.403412	-2.8091	-2.8091	-2.8091	-2.8091	-2.8091	-2.8091	-2.8091	-2.8091	-2.8091	-2.8091	-2.8091	-2.8091	-2.8091	-2.8091	-2.8091	-2.8091	-2.8091	-2.8091
rno-piR-11048	-2.8091	-2.8091	-1.9595	-2.8091	-2.8091	-2.8091	-2.8091	-2.8091	-2.8091	-2.8091	-2.8091	-2.8091	-2.8091	-2.8091	-2.8091	-2.8091	-2.8091	-2.8091	-2.8091	-2.8091	-2.8091	-2.8091	-2.8091	-2.8091
rno-piR-11049	-2.8091	-2.8091	-1.9595	-2.8091	-2.8091	-0.403412	-2.8091	-2.8091	-2.8091	-2.8091	-2.8091	-2.8091	-2.8091	-2.8091	-2.8091	-2.8091	-2.8091	-2.8091	-2.8091	-0.305325	-2.8091	-2.8091	-2.8091	-2.8091
rno-piR-11050	-2.8091	-1.21021	-0.716865	-0.817012	-0.691621	-2.8091	-2.8091	-2.8091	-2.8091	-2.8091	-2.8091	-2.8091	-2.8091	-2.8091	-2.8091	-2.8091	0.493989	-0.401497	0.0317522	-2.8091	-2.8091	-2.8091	-2.8091	-2.8091
rno-piR-11052	0.228153	-2.8091	-1.00219	-2.8091	-0.691621	-2.8091	-2.8091	-2.8091	-2.8091	-2.8091	-2.8091	-2.8091	-2.8091	-0.857667	-2.8091	-2.8091	-2.8091	-2.8091	0.0317522	-2.8091	-2.8091	-2.8091	-2.8091	-2.8091
rno-piR-11053	-2.8091	-1.21021	-1.9595	-2.8091	-2.8091	-2.8091	-2.8091	-2.8091	-2.8091	-2.8091	-2.8091	-2.8091	-2.8091	-0.857667	-2.8091	-2.8091	-0.912094	-2.8091	-2.8091	-2.8091	-2.8091	-2.8091	-2.8091	-2.8091
rno-piR-11054	-2.8091	-0.640445	0.112934	0.899196	-2.8091	1.91202	2.54268	0.646749	-2.8091	-0.291042	-2.8091	-2.8091	-2.8091	-0.203124	-2.8091	-2.8091	-0.912094	0.340829	2.48009	0.45269	-2.8091	1.42735	1.88149	-2.8091
rno-piR-11056	-2.8091	-2.8091	-1.37586	-2.8091	-2.8091	-2.8091	2.54268	0.646749	-2.8091	-2.8091	-2.8091	-2.8091	-2.8091	-2.8091	-2.8091	-2.8091	-2.8091	-2.8091	-2.8091	-2.8091	-2.8091	-2.8091	-2.8091	-2.8091
rno-piR-11057	-2.8091	-2.8091	-1.62376	-2.8091	-0.691621	-2.8091	-2.8091	-2.8091	-2.8091	-2.8091	-2.8091	-2.8091	-2.8091	-2.8091	-2.8091	-2.8091	-0.912094	-2.8091	-2.8091	-2.8091	-2.8091	-2.8091	-2.8091	-2.8091
rno-piR-11058	-2.8091	-2.8091	-0.483425	-0.817012	-2.8091	-0.403412	2.54268	2.05668	-2.8091	1.32461	2.46457	2.03091	-2.8091	-2.8091	-2.8091	-2.8091	-2.8091	-2.8091	0.838007	0.942549	-2.8091	1.42735	-2.8091	-2.8091
rno-piR-11060	-2.8091	-2.8091	-1.9595	-2.8091	-2.8091	-2.8091	-2.8091	-2.8091	-2.8091	-2.8091	-2.8091	-2.8091	-2.8091	-2.8091	-2.8091	-2.8091	-2.8091	-2.8091	-2.8091	-2.8091	-2.8091	-2.8091	4.11334	-2.8091
rno-piR-11061	-0.497571	-2.8091	-1.62376	-2.8091	-2.8091	-2.8091	-2.8091	-2.8091	-2.8091	-2.8091	-2.8091	-2.8091	-2.8091	-2.8091	-2.8091	-2.8091	-2.8091	-0.401497	0.0317522	-2.8091	-2.8091	-2.8091	-2.8091	-2.8091
rno-piR-11063	-2.8091	-0.640445	-1.62376	-0.817012	-2.8091	-2.8091	-2.8091	-2.8091	-2.8091	-2.8091	-2.8091	-2.8091	-2.8091	-0.857667	-2.8091	-2.8091	-2.8091	-2.8091	-2.8091	-2.8091	-2.8091	-2.8091	-2.8091	-2.8091
rno-piR-11064	1.34239	0.308753	0.890033	2.24327	0.79938	1.46788	3.72484	3.72427	-2.8091	2.06297	2.46457	-2.8091	-2.8091	1.43551	-2.8091	0.370133	0.163835	1.18319	1.34924	3.49372	-2.8091	4.74489	-2.8091	3.09317
rno-piR-11065	-2.8091	-2.8091	-1.9595	-2.8091	-2.8091	-2.8091	-2.8091	-2.8091	-2.8091	-2.8091	-2.8091	-2.8091	-2.8091	-2.8091	-2.8091	-2.8091	-2.8091	-2.8091	-2.8091	-2.8091	-2.8091	-2.8091	-2.8091	-2.8091
rno-piR-11067	-0.497571	-2.8091	-1.17414	-2.8091	-0.691621	-2.8091	-2.8091	-2.8091	2.2881	-2.8091	-2.8091	-2.8091	-2.8091	-2.8091	-2.8091	-2.8091	-2.8091	-0.401497	-2.8091	1.30646	-2.8091	-2.8091	-2.8091	-2.8091
rno-piR-11068	-2.8091	-2.8091	-1.17414	-2.8091	-0.691621	-2.8091	1.08683	-2.8091	-2.8091	-2.8091	-2.8091	-2.8091	-2.8091	-2.8091	-2.8091	-2.8091	-2.8091	-2.8091	0.0317522	-2.8091	-2.8091	-2.8091	-2.8091	-2.8091
rno-piR-11069	-2.8091	0.0587823	0.244802	2.03484	1.50838	-0.403412	-2.8091	-2.8091	-2.8091	3.01414	-2.8091	5.39758	-2.8091	-2.8091	-2.8091	-2.8091	0.163835	-0.401497	1.72527	4.43945	-2.8091	-2.8091	-2.8091	3.91985
rno-piR-1107	-2.8091	-1.21021	-1.9595	-2.8091	-0.00243066	-2.8091	-2.8091	-2.8091	-2.8091	-2.8091	-2.8091	-2.8091	-2.8091	-2.8091	-2.8091	-2.8091	-2.8091	-2.8091	-2.8091	-2.8091	-2.8091	-2.8091	-2.8091	-2.8091
rno-piR-11070	-2.8091	-2.8091	-0.851482	-2.8091	0.454729	-0.403412	-2.8091	-2.8091	-2.8091	-2.8091	-2.8091	-2.8091	-2.8091	-2.8091	-2.8091	-2.8091	-0.269622	-2.8091	-2.8091	-2.8091	-2.8091	-2.8091	-2.8091	-2.8091
rno-piR-11071	-0.497571	-2.8091	-1.37586	-2.8091	-2.8091	-2.8091	-2.8091	-2.8091	-2.8091	-2.8091	-2.8091	-2.8091	-2.8091	-2.8091	-2.8091	-2.8091	-2.8091	-2.8091	-2.8091	-2.8091	-2.8091	-2.8091	-2.8091	-2.8091
rno-piR-11073	-0.497571	-2.8091	0.112934	-2.8091	-2.8091	1.70704	-2.8091	-2.8091	-2.8091	-2.8091	-2.8091	-2.8091	-2.8091	-0.203124	-2.8091	-2.8091	-0.912094	-2.8091	1.34924	-2.8091	-2.8091	-2.8091	-2.8091	-2.8091
rno-piR-11076	-2.8091	-2.8091	-1.37586	-0.817012	-0.691621	-0.403412	-2.8091	-2.8091	-2.8091	1.61494	-2.8091	-2.8091	-2.8091	-2.8091	-2.8091	-2.8091	-0.269622	-2.8091	-2.8091	-2.8091	-2.8091	-2.8091	-2.8091	-2.8091
rno-piR-11077	-2.8091	-2.8091	-1.00219	-2.8091	-2.8091	-2.8091	-2.8091	-2.8091	-2.8091	-2.8091	-2.8091	-2.8091	-2.8091	-0.203124	-2.8091	-2.8091	-2.8091	-0.401497	-2.8091	-2.8091	-2.8091	-2.8091	-2.8091	-2.8091
rno-piR-1108	-2.8091	-2.8091	-1.9595	-2.8091	-2.8091	-2.8091	-2.8091	-2.8091	-2.8091	-2.8091	-2.8091	-2.8091	-2.8091	-0.857667	-2.8091	-2.8091	-2.8091	-2.8091	-2.8091	-2.8091	-2.8091	-2.8091	-2.8091	-2.8091
rno-piR-11081	-2.8091	-2.8091	-2.8091	-2.8091	-0.691621	-2.8091	-2.8091	-2.8091	-2.8091	-2.8091	-2.8091	-2.8091	-2.8091	-2.8091	-2.8091	-2.8091	-2.8091	-2.8091	-2.8091	-2.8091	-2.8091	-2.8091	-2.8091	-2.8091
rno-piR-11082	-2.8091	-1.21021	-1.62376	-2.8091	-0.691621	-2.8091	-2.8091	-2.8091	-2.8091	-2.8091	-2.8091	-2.8091	-2.8091	-2.8091	-2.8091	-2.8091	-2.8091	-2.8091	-2.8091	2.66031	-2.8091	-2.8091	-2.8091	-2.8091
rno-piR-11084	-2.8091	-1.21021	-0.851482	-2.8091	-2.8091	0.338593	-2.8091	2.44751	-2.8091	-2.8091	-2.8091	-2.8091	-2.8091	-2.8091	-2.8091	-2.8091	-0.912094	-2.8091	0.0317522	-2.8091	-2.8091	-2.8091	-2.8091	-2.8091
rno-piR-11087	-2.8091	-1.21021	-2.8091	-0.817012	-2.8091	-2.8091	-2.8091	-2.8091	-2.8091	-2.8091	3.83307	-2.8091	-2.8091	-2.8091	-2.8091	-2.8091	-2.8091	-2.8091	-2.8091	-2.8091	-2.8091	-2.8091	-2.8091	-2.8091
rno-piR-11088	-2.8091	-2.8091	-1.00219	-2.8091	-2.8091	-2.8091	-2.8091	-2.8091	-2.8091	-2.8091	-2.8091	-2.8091	-2.8091	-2.8091	-2.8091	-2.8091	-2.8091	-2.8091	-2.8091	-2.8091	-2.8091	-2.8091	-2.8091	-2.8091
rno-piR-11089	-2.8091	-2.8091	-1.9595	-2.8091	-2.8091	-2.8091	-2.8091	-2.8091	-2.8091	-2.8091	-2.8091	-2.8091	-2.8091	-2.8091	-2.8091	-2.8091	-2.8091	-2.8091	-2.8091	-2.8091	-2.8091	-2.8091	-2.8091	-2.8091
rno-piR-11090	-0.497571	-2.8091	-2.8091	-2.8091	-2.8091	-2.8091	-2.8091	-2.8091	-2.8091	-2.8091	-2.8091	-2.8091	-2.8091	-2.8091	-2.8091	-2.8091	-2.8091	-2.8091	-2.8091	-2.8091	-2.8091	-2.8091	-2.8091	-2.8091
rno-piR-11091	-2.8091	-2.8091	-2.8091	-2.8091	-2.8091	-2.8091	-2.8091	-2.8091	2.2881	-2.8091	-2.8091	-2.8091	-2.8091	-2.8091	-2.8091	-2.8091	-2.8091	-2.8091	-2.8091	-2.8091	-2.8091	-2.8091	-2.8091	-2.8091
rno-piR-11093	-0.497571	-2.8091	-0.284903	-2.8091	-0.691621	-2.8091	-2.8091	-2.8091	-2.8091	-2.8091	-2.8091	-2.8091	-2.8091	-0.857667	-2.8091	-2.8091	-2.8091	-2.8091	0.838007	-2.8091	-2.8091	-2.8091	-2.8091	-2.8091
rno-piR-11094	-2.8091	-2.8091	-1.9595	-2.8091	-2.8091	-2.8091	2.94032	-2.8091	-2.8091	-2.8091	-2.8091	-2.8091	-2.8091	-2.8091	-2.8091	-2.8091	-2.8091	-0.401497	1.72527	-2.8091	-2.8091	-2.8091	-2.8091	-2.8091
rno-piR-11095	-2.8091	-1.21021	-2.8091	-0.153685	-2.8091	-2.8091	-2.8091	-2.8091	-2.8091	-2.8091	-2.8091	-2.8091	-2.8091	-2.8091	-2.8091	-2.8091	-2.8091	0.340829	0.0317522	-2.8091	-2.8091	0.563112	-2.8091	-2.8091
rno-piR-11096	-2.8091	-1.21021	-0.380507	-0.153685	-2.8091	-0.403412	-2.8091	-2.8091	-2.8091	0.469226	-2.8091	-2.8091	-2.8091	-2.8091	-2.8091	-2.8091	-2.8091	-2.8091	0.838007	-2.8091	-2.8091	-2.8091	-2.8091	-2.8091
rno-piR-11097	-2.8091	-2.8091	-2.8091	-2.8091	-2.8091	-2.8091	-2.8091	-2.8091	-2.8091	-0.291042	-2.8091	-2.8091	-2.8091	-2.8091	-2.8091	-2.8091	-2.8091	-2.8091	-2.8091	-2.8091	-2.8091	-2.8091	-2.8091	-2.8091
rno-piR-11098	-2.8091	-2.8091	-2.8091	-2.8091	-2.8091	-2.8091	-2.8091	-2.8091	-2.8091	-2.8091	-2.8091	-2.8091	-2.8091	-2.8091	-2.8091	-2.8091	-0.912094	-2.8091	-2.8091	-2.8091	-2.8091	-2.8091	-2.8091	1.83995
rno-piR-11099	-2.8091	-2.8091	-1.9595	-2.8091	-2.8091	-2.8091	-2.8091	-2.8091	-2.8091	-2.8091	-2.8091	-2.8091	-2.8091	-2.8091	-2.8091	-2.8091	-0.912094	-0.401497	-2.8091	-2.8091	-2.8091	-2.8091	-2.8091	-2.8091
rno-piR-1110	1.34239	-0.640445	-0.380507	-0.817012	-0.691621	0.821078	-2.8091	-2.8091	-2.8091	-2.8091	-2.8091	-2.8091	-2.8091	-0.857667	-2.8091	-2.8091	-2.8091	0.340829	-2.8091	-2.8091	-2.8091	-2.8091	-2.8091	-2.8091
rno-piR-11100	-2.8091	-1.21021	-2.8091	-2.8091	-2.8091	-0.403412	-2.8091	-2.8091	-2.8091	-2.8091	-2.8091	-2.8091	-2.8091	-2.8091	-2.8091	-2.8091	-2.8091	-2.8091	-2.8091	-2.8091	-2.8091	-2.8091	-2.8091	-2.8091
rno-piR-11101	1.34239	0.308753	0.720831	-2.8091	2.22684	1.91202	-2.8091	1.51844	-2.8091	1.32461	-2.8091	-2.8091	-2.8091	0.236575	-2.8091	-2.8091	-0.269622	1.18319	1.72527	-2.8091	-2.8091	-2.8091	-2.8091	5.12672
rno-piR-11104	-2.8091	-2.8091	-1.62376	-2.8091	-2.8091	-2.8091	-2.8091	-2.8091	-2.8091	0.960112	-2.8091	-2.8091	-2.8091	-2.8091	-2.8091	-2.8091	-2.8091	-2.8091	-2.8091	-2.8091	-2.8091	-2.8091	-2.8091	-2.8091
rno-piR-11105	0.228153	-1.21021	-0.0327353	0.290504	0.454729	-0.403412	-2.8091	-2.8091	5.0226	0.469226	-2.8091	3.95503	-2.8091	-0.203124	-2.8091	-2.8091	0.986392	0.340829	0.0317522	2.52915	-2.8091	3.99642	-2.8091	-2.8091
rno-piR-11106	0.228153	-2.8091	-1.17414	-2.8091	0.79938	0.338593	-2.8091	-2.8091	-2.8091	0.469226	-2.8091	-2.8091	-2.8091	-2.8091	-2.8091	-2.8091	-2.8091	0.823464	-2.8091	-2.8091	-2.8091	-2.8091	-2.8091	-2.8091
rno-piR-11108	-2.8091	-2.8091	-1.00219	-2.8091	-2.8091	-2.8091	-2.8091	-2.8091	-2.8091	-2.8091	-2.8091	-2.8091	-2.8091	-2.8091	-2.8091	-2.8091	-2.8091	-2.8091	-2.8091	-2.8091	-2.8091	-2.8091	-2.8091	-2.8091
rno-piR-11109	-2.8091	-2.8091	-2.8091	-2.8091	-2.8091	-2.8091	-2.8091	-2.8091	-2.8091	-2.8091	-2.8091	-2.8091	-2.8091	-2.8091	-2.8091	1.21556	-2.8091	-2.8091	-2.8091	-2.8091	-2.8091	-2.8091	-2.8091	-2.8091
rno-piR-1111	1.57947	-2.8091	0.476328	-0.817012	-0.00243066	0.338593	-2.8091	-2.8091	-2.8091	2.54854	-2.8091	-2.8091	-2.8091	-0.857667	-2.8091	-2.8091	0.493989	-0.401497	1.72527	1.83752	-2.8091	2.65797	-2.8091	-2.8091
rno-piR-11110	-0.497571	-2.8091	-0.195589	-2.8091	-2.8091	-2.8091	-2.8091	-2.8091	-2.8091	0.960112	-2.8091	-2.8091	-2.8091	-2.8091	-2.8091	-2.8091	-2.8091	-0.401497	1.34924	-2.8091	-2.8091	-2.8091	-2.8091	-2.8091
rno-piR-11111	-2.8091	-2.8091	-1.62376	-2.8091	-0.691621	-2.8091	-2.8091	-2.8091	-2.8091	-2.8091	-2.8091	-2.8091	-2.8091	-2.8091	-2.8091	-2.8091	-0.912094	-2.8091	-2.8091	-2.8091	-2.8091	-2.8091	-2.8091	-2.8091
rno-piR-11112	0.228153	-2.8091	-1.17414	-2.8091	-0.00243066	-2.8091	-2.8091	-2.8091	-2.8091	-2.8091	-2.8091	-2.8091	-2.8091	-2.8091	-2.8091	-2.8091	-2.8091	-2.8091	-2.8091	-2.8091	-2.8091	-2.8091	-2.8091	-2.8091
rno-piR-11113	0.702996	-0.246323	0.890033	1.49727	1.07661	1.70704	4.36565	0.646749	-2.8091	-2.8091	-2.8091	-2.8091	-2.8091	0.570591	-2.8091	2.43186	-0.269622	1.18319	1.34924	2.99449	-2.8091	2.65797	2.82617	4.20444
rno-piR-11114	-2.8091	-2.8091	-1.62376	-0.817012	-0.691621	-2.8091	-2.8091	-2.8091	-2.8091	-2.8091	1.01527	-2.8091	-2.8091	-0.857667	-2.8091	-2.8091	-2.8091	-2.8091	-2.8091	-0.305325	-2.8091	-2.8091	-2.8091	-2.8091
rno-piR-11115	-2.8091	-1.21021	-1.62376	-2.8091	-0.691621	-2.8091	-2.8091	-2.8091	-2.8091	-2.8091	-2.8091	-2.8091	-2.8091	-0.857667	-2.8091	-2.8091	-2.8091	-0.401497	-2.8091	-2.8091	-2.8091	-2.8091	-2.8091	-2.8091
rno-piR-11116	-2.8091	-2.8091	-0.483425	-2.8091	-2.8091	0.338593	-2.8091	-2.8091	-2.8091	-2.8091	-2.8091	-2.8091	-2.8091	-2.8091	-2.8091	-2.8091	-2.8091	-2.8091	-2.8091	-2.8091	-2.8091	-2.8091	-2.8091	-2.8091
rno-piR-11117	-2.8091	-2.8091	-2.8091	-2.8091	-2.8091	-2.8091	-2.8091	-2.8091	-2.8091	-2.8091	-2.8091	-2.8091	-2.8091	-2.8091	-2.8091	-2.8091	-2.8091	-2.8091	0.838007	-2.8091	-2.8091	-2.8091	-2.8091	-2.8091
rno-piR-11118	1.57947	-2.8091	-0.851482	-0.153685	-0.691621	0.338593	-2.8091	-2.8091	-2.8091	1.32461	-2.8091	-2.8091	-2.8091	0.236575	-2.8091	-2.8091	-0.912094	-0.401497	1.34924	-2.8091	-2.8091	-2.8091	-2.8091	-2.8091
rno-piR-11119	3.21981	1.2692	1.80246	2.86416	-0.00243066	1.91202	5.21918	3.22282	8.06207	2.06297	-2.8091	7.10129	-2.8091	1.85471	-2.8091	4.85423	0.7614	2.09402	1.34924	3.75072	-2.8091	1.42735	-2.8091	-2.8091
rno-piR-1112	-2.8091	-2.8091	-1.37586	-2.8091	-2.8091	-2.8091	-2.8091	-2.8091	-2.8091	-2.8091	-2.8091	-2.8091	-2.8091	-2.8091	-2.8091	-2.8091	-2.8091	-2.8091	-2.8091	-2.8091	-2.8091	-2.8091	-2.8091	-2.8091
rno-piR-11120	-2.8091	-1.21021	-0.716865	0.290504	1.07661	-0.403412	1.99161	-2.8091	-2.8091	1.32461	1.01527	-2.8091	-2.8091	-0.857667	-2.8091	-2.8091	0.163835	1.18319	0.838007	-2.8091	-2.8091	0.563112	3.39198	2.38734
rno-piR-11121	-2.8091	-2.8091	-1.17414	-2.8091	-0.691621	-0.403412	-2.8091	-2.8091	-2.8091	-2.8091	-2.8091	-2.8091	-2.8091	-2.8091	-2.8091	-2.8091	-2.8091	-2.8091	0.0317522	-2.8091	-2.8091	-2.8091	-2.8091	-2.8091
rno-piR-11122	-2.8091	-2.8091	-1.37586	-2.8091	-0.00243066	-2.8091	-2.8091	-2.8091	-2.8091	-2.8091	-2.8091	-2.8091	-2.8091	0.570591	-2.8091	-2.8091	-0.912094	-2.8091	-2.8091	-2.8091	-2.8091	-2.8091	-2.8091	-2.8091
rno-piR-11123	-2.8091	-2.8091	-2.8091	-2.8091	-2.8091	-2.8091	2.54268	-2.8091	-2.8091	-2.8091	-2.8091	-2.8091	-2.8091	-2.8091	-2.8091	-2.8091	-2.8091	-0.401497	-2.8091	-2.8091	-2.8091	-2.8091	-2.8091	-2.8091
rno-piR-11125	-0.497571	-2.8091	-1.9595	-2.8091	-2.8091	-2.8091	-2.8091	-2.8091	-2.8091	1.85633	-2.8091	-2.8091	-2.8091	-2.8091	-2.8091	-2.8091	-2.8091	-2.8091	-2.8091	-2.8091	-2.8091	-2.8091	3.39198	-2.8091
rno-piR-11126	-2.8091	-2.8091	-1.62376	-0.817012	-2.8091	-2.8091	-2.8091	-2.8091	-2.8091	-2.8091	-2.8091	-2.8091	-2.8091	-2.8091	-2.8091	-2.8091	-2.8091	-2.8091	0.0317522	-2.8091	-2.8091	-2.8091	-2.8091	-2.8091
rno-piR-11127	1.57947	-1.21021	0.628027	-0.153685	-2.8091	-0.403412	3.72484	-2.8091	-2.8091	-0.291042	3.6445	-2.8091	-2.8091	-2.8091	-2.8091	-2.8091	0.163835	-0.401497	0.0317522	3.69063	-2.8091	-2.8091	-2.8091	5.53882
rno-piR-11128	-2.8091	-2.8091	-1.37586	-2.8091	-2.8091	-2.8091	-2.8091	-2.8091	-2.8091	-2.8091	-2.8091	-2.8091	-2.8091	-2.8091	-2.8091	-2.8091	-2.8091	-2.8091	-2.8091	-2.8091	-2.8091	-2.8091	-2.8091	-2.8091
rno-piR-11129	-2.8091	-2.8091	-1.37586	-2.8091	-2.8091	-2.8091	-2.8091	-2.8091	-2.8091	-2.8091	-2.8091	-2.8091	-2.8091	-2.8091	-2.8091	-2.8091	-2.8091	-2.8091	-2.8091	-2.8091	-2.8091	-2.8091	-2.8091	-2.8091
rno-piR-1113	-0.497571	-2.8091	-2.8091	0.290504	-0.691621	0.338593	-2.8091	-2.8091	-2.8091	-2.8091	-2.8091	-2.8091	-2.8091	-2.8091	-2.8091	-2.8091	-0.912094	-2.8091	0.0317522	-2.8091	-2.8091	-2.8091	-2.8091	-2.8091
rno-piR-11131	-2.8091	-1.21021	-1.17414	-0.153685	-2.8091	-2.8091	-2.8091	-2.8091	-2.8091	-2.8091	-2.8091	2.98098	-2.8091	-2.8091	-2.8091	-2.8091	-0.912094	-2.8091	-2.8091	-2.8091	-2.8091	-2.8091	-2.8091	-2.8091
rno-piR-11132	-2.8091	-2.8091	-1.17414	-2.8091	-2.8091	-2.8091	-2.8091	-2.8091	-2.8091	-2.8091	-2.8091	-2.8091	-2.8091	-2.8091	-2.8091	-2.8091	-2.8091	-2.8091	-2.8091	-2.8091	-2.8091	-2.8091	-2.8091	-2.8091
rno-piR-11133	1.34239	1.0149	2.49299	2.14282	1.98073	-0.403412	1.08683	-2.8091	-2.8091	2.40414	-2.8091	6.51782	-2.8091	1.26331	-2.8091	-2.8091	1.50456	-0.401497	2.26962	4.95566	-2.8091	4.67851	-2.8091	-2.8091
rno-piR-11134	-2.8091	-2.8091	-1.9595	-2.8091	-2.8091	-2.8091	-2.8091	-2.8091	-2.8091	-2.8091	-2.8091	-2.8091	-2.8091	-2.8091	-2.8091	-2.8091	-2.8091	-2.8091	-2.8091	-2.8091	-2.8091	-2.8091	-2.8091	-2.8091
rno-piR-11135	-0.497571	0.308753	0.112934	1.79104	1.07661	0.338593	-2.8091	-2.8091	-2.8091	-2.8091	-2.8091	-2.8091	-2.8091	-0.857667	-2.8091	-2.8091	-0.912094	0.823464	2.02303	4.64338	-2.8091	2.65797	-2.8091	-2.8091
rno-piR-11136	-2.8091	-2.8091	-1.9595	-2.8091	-2.8091	-2.8091	-2.8091	-2.8091	-2.8091	-2.8091	-2.8091	-2.8091	-2.8091	-2.8091	-2.8091	-2.8091	-0.269622	-2.8091	-2.8091	-2.8091	-2.8091	-2.8091	-2.8091	-2.8091
rno-piR-11137	-2.8091	-2.8091	-1.37586	-2.8091	-2.8091	-2.8091	-2.8091	-2.8091	2.2881	-2.8091	-2.8091	-2.8091	-2.8091	-2.8091	-2.8091	-2.8091	-2.8091	-2.8091	-2.8091	-2.8091	-2.8091	0.563112	-2.8091	-2.8091
rno-piR-1114	-0.497571	-1.21021	-0.380507	1.12746	-0.691621	0.821078	1.08683	0.646749	2.2881	0.469226	3.6445	-2.8091	-2.8091	0.570591	4.41621	-2.8091	0.163835	-2.8091	0.838007	4.4755	-2.8091	2.35186	-2.8091	3.75329
rno-piR-11140	-2.8091	-2.8091	-1.00219	-2.8091	-2.8091	-2.8091	-2.8091	-2.8091	-2.8091	1.32461	-2.8091	-2.8091	-2.8091	-2.8091	-2.8091	-2.8091	-2.8091	-2.8091	-2.8091	-2.8091	-2.8091	-2.8091	-2.8091	-2.8091
rno-piR-11141	-2.8091	-2.8091	-2.8091	-2.8091	-2.8091	-2.8091	-2.8091	-2.8091	-2.8091	-2.8091	-2.8091	-2.8091	-2.8091	-0.203124	-2.8091	-2.8091	-2.8091	-2.8091	-2.8091	-2.8091	-2.8091	-2.8091	-2.8091	-2.8091
rno-piR-11142	-2.8091	-2.8091	-1.37586	-2.8091	-0.691621	-2.8091	-2.8091	-2.8091	-2.8091	-2.8091	2.46457	-2.8091	-2.8091	-2.8091	-2.8091	-2.8091	-2.8091	-2.8091	-2.8091	-2.8091	-2.8091	-2.8091	-2.8091	-2.8091
rno-piR-11143	0.228153	-2.8091	-1.00219	-2.8091	-0.691621	-2.8091	-2.8091	-2.8091	-2.8091	-2.8091	-2.8091	-2.8091	-2.8091	-2.8091	-2.8091	-2.8091	-0.269622	-0.401497	-2.8091	-2.8091	-2.8091	-2.8091	-2.8091	-2.8091
rno-piR-11144	-2.8091	-2.8091	-1.00219	-2.8091	-2.8091	-2.8091	-2.8091	-2.8091	-2.8091	-2.8091	-2.8091	-2.8091	-2.8091	-0.203124	-2.8091	-2.8091	-2.8091	-0.401497	-2.8091	-2.8091	-2.8091	-2.8091	-2.8091	-2.8091
rno-piR-11145	3.41575	2.35894	2.62993	4.45393	2.53155	3.12808	4.98666	2.44751	-2.8091	3.2005	-2.8091	2.03091	-2.8091	3.03041	-2.8091	4.63419	1.99163	2.52767	1.72527	3.56238	-2.8091	-2.8091	4.95079	-2.8091
rno-piR-11149	-2.8091	-2.8091	-1.62376	-2.8091	-2.8091	-2.8091	-2.8091	-2.8091	-2.8091	-2.8091	-2.8091	-2.8091	-2.8091	-2.8091	-2.8091	-2.8091	-2.8091	-2.8091	-2.8091	-2.8091	-2.8091	-2.8091	-2.8091	-2.8091
rno-piR-1115	-2.8091	-2.8091	-1.9595	-2.8091	-2.8091	-2.8091	-2.8091	-2.8091	-2.8091	-2.8091	-2.8091	-2.8091	-2.8091	-2.8091	-2.8091	-2.8091	-2.8091	-2.8091	-2.8091	-2.8091	-2.8091	-2.8091	-2.8091	-2.8091
rno-piR-11153	-2.8091	-2.8091	-1.00219	-0.817012	0.454729	-0.403412	-2.8091	-2.8091	2.2881	-2.8091	-2.8091	5.5223	-2.8091	-2.8091	-2.8091	-2.8091	-2.8091	0.340829	0.838007	0.942549	-2.8091	1.42735	-2.8091	-2.8091
rno-piR-11154	0.228153	-1.21021	-1.00219	-2.8091	-0.691621	1.91202	-2.8091	3.00764	-2.8091	-0.291042	-2.8091	-2.8091	-2.8091	-2.8091	-2.8091	-2.8091	-2.8091	-2.8091	0.0317522	-2.8091	-2.8091	-2.8091	-2.8091	-2.8091
rno-piR-11155	-0.497571	0.520875	1.57426	0.899196	0.79938	0.821078	-2.8091	-2.8091	-2.8091	-2.8091	3.42752	-2.8091	-2.8091	1.43551	-2.8091	0.370133	0.163835	-0.401497	0.0317522	-2.8091	-2.8091	-2.8091	-2.8091	-2.8091
rno-piR-11156	-2.8091	-2.8091	-1.9595	-2.8091	-2.8091	-2.8091	-2.8091	-2.8091	-2.8091	-2.8091	-2.8091	-2.8091	-2.8091	-2.8091	-2.8091	-2.8091	-2.8091	-2.8091	-2.8091	-2.8091	-2.8091	-2.8091	-2.8091	-2.8091
rno-piR-11157	-2.8091	-2.8091	-2.8091	-2.8091	-2.8091	-2.8091	-2.8091	-2.8091	-2.8091	-2.8091	-2.8091	-2.8091	-2.8091	-0.857667	-2.8091	-2.8091	-2.8091	-2.8091	-2.8091	-2.8091	-2.8091	-2.8091	-2.8091	-2.8091
rno-piR-11158	-2.8091	-2.8091	-2.8091	-0.817012	-2.8091	-2.8091	-2.8091	-2.8091	2.2881	1.32461	-2.8091	-2.8091	-2.8091	-2.8091	-2.8091	-2.8091	-2.8091	-2.8091	-2.8091	-2.8091	-2.8091	4.80836	-2.8091	-2.8091
rno-piR-11159	-2.8091	-2.8091	-1.62376	-2.8091	-0.691621	-2.8091	-2.8091	-2.8091	-2.8091	-2.8091	-2.8091	-2.8091	-2.8091	1.26331	-2.8091	-2.8091	-2.8091	-2.8091	-2.8091	2.66031	-2.8091	-2.8091	-2.8091	-2.8091
rno-piR-11160	1.57947	0.0587823	1.17801	1.65165	-0.00243066	2.25088	-2.8091	1.51844	-2.8091	-2.8091	-2.8091	-2.8091	-2.8091	-0.857667	-2.8091	3.52795	-2.8091	1.18319	-2.8091	-2.8091	-2.8091	-2.8091	-2.8091	-2.8091
rno-piR-11162	-2.8091	-2.8091	-1.17414	-0.817012	-2.8091	-2.8091	-2.8091	-2.8091	-2.8091	-2.8091	-2.8091	-2.8091	-2.8091	-2.8091	-2.8091	-2.8091	-2.8091	-2.8091	1.34924	-2.8091	-2.8091	-2.8091	-2.8091	-2.8091
rno-piR-11163	-0.497571	-2.8091	-1.62376	-2.8091	-2.8091	0.338593	-2.8091	-2.8091	-2.8091	-2.8091	-2.8091	-2.8091	-2.8091	-2.8091	-2.8091	-2.8091	-2.8091	-2.8091	-2.8091	-2.8091	-2.8091	-2.8091	-2.8091	-2.8091
rno-piR-11164	-2.8091	-2.8091	-1.62376	-2.8091	-2.8091	-2.8091	-2.8091	-2.8091	-2.8091	-2.8091	-2.8091	-2.8091	-2.8091	-0.203124	-2.8091	-2.8091	-2.8091	-2.8091	-2.8091	-2.8091	-2.8091	-2.8091	-2.8091	-2.8091
rno-piR-11165	-2.8091	-2.8091	-1.62376	-0.817012	-0.691621	-2.8091	-2.8091	-2.8091	-2.8091	-2.8091	-2.8091	-2.8091	-2.8091	-2.8091	-2.8091	-2.8091	-2.8091	-2.8091	-2.8091	3.86386	-2.8091	-2.8091	-2.8091	-2.8091
rno-piR-11166	-2.8091	-2.8091	-2.8091	-2.8091	-0.691621	-2.8091	-2.8091	-2.8091	-2.8091	-2.8091	-2.8091	-2.8091	-2.8091	-2.8091	-2.8091	-2.8091	-2.8091	-2.8091	-2.8091	-2.8091	-2.8091	-2.8091	-2.8091	-2.8091
rno-piR-11170	-0.497571	-0.640445	-0.380507	-0.153685	-2.8091	-0.403412	1.99161	2.44751	-2.8091	-2.8091	-2.8091	4.53119	3.34981	-2.8091	-2.8091	-2.8091	0.493989	-0.401497	0.838007	3.09063	-2.8091	3.4772	-2.8091	-2.8091
rno-piR-11171	-2.8091	-2.8091	-1.9595	-2.8091	-0.691621	0.338593	-2.8091	-2.8091	-2.8091	-2.8091	-2.8091	-2.8091	-2.8091	-2.8091	-2.8091	-2.8091	-2.8091	-2.8091	-2.8091	-2.8091	-2.8091	-2.8091	-2.8091	-2.8091
rno-piR-11172	-2.8091	-2.8091	-1.00219	-2.8091	-2.8091	-2.8091	-2.8091	-2.8091	-2.8091	-2.8091	-2.8091	-2.8091	-2.8091	-2.8091	-2.8091	-2.8091	-2.8091	-2.8091	0.0317522	-2.8091	-2.8091	-2.8091	-2.8091	-2.8091
rno-piR-11173	-0.497571	1.2692	2.20477	1.79104	0.79938	1.18072	-2.8091	-2.8091	3.24626	0.469226	-2.8091	-2.8091	-2.8091	0.840636	-2.8091	-2.8091	2.09138	0.823464	0.838007	-2.8091	-2.8091	-2.8091	-2.8091	-2.8091
rno-piR-11174	-2.8091	-1.21021	-1.62376	-0.817012	-2.8091	-2.8091	-2.8091	-2.8091	-2.8091	-0.291042	1.01527	3.54872	-2.8091	-0.857667	-2.8091	-2.8091	-2.8091	-2.8091	-2.8091	-0.305325	-2.8091	0.563112	-2.8091	-2.8091
rno-piR-11175	-2.8091	-1.21021	0.180423	-2.8091	-0.691621	0.338593	-2.8091	-2.8091	-2.8091	-2.8091	-2.8091	-2.8091	-2.8091	-0.203124	-2.8091	-2.8091	-0.269622	0.340829	-2.8091	-2.8091	-2.8091	-2.8091	-2.8091	-2.8091
rno-piR-11177	-2.8091	-0.640445	-0.284903	-0.817012	-0.00243066	-2.8091	-2.8091	1.51844	-2.8091	-2.8091	-2.8091	-2.8091	-2.8091	-0.857667	-2.8091	-2.8091	-0.912094	0.340829	0.0317522	-2.8091	-2.8091	-2.8091	-2.8091	-2.8091
rno-piR-11178	-2.8091	-2.8091	-1.00219	-2.8091	-2.8091	-2.8091	-2.8091	-2.8091	-2.8091	-2.8091	-2.8091	-2.8091	-2.8091	-2.8091	-2.8091	-2.8091	-2.8091	-2.8091	-2.8091	-2.8091	-2.8091	0.563112	-2.8091	-2.8091
rno-piR-11179	-2.8091	-1.21021	1.24178	1.32426	1.98073	1.46788	1.99161	0.646749	-2.8091	0.469226	-2.8091	-2.8091	0.946182	0.236575	-2.8091	1.74324	1.35176	1.70961	0.838007	0.45269	-2.8091	-2.8091	-2.8091	5.25694
rno-piR-1118	-2.8091	-2.8091	-0.851482	-2.8091	-2.8091	-2.8091	-2.8091	-2.8091	-2.8091	-2.8091	3.99981	-2.8091	0.946182	-2.8091	-2.8091	0.370133	-2.8091	-2.8091	0.838007	-2.8091	-2.8091	-2.8091	-2.8091	-2.8091
rno-piR-11182	-2.8091	-2.8091	-2.8091	-2.8091	-2.8091	-2.8091	-2.8091	-2.8091	6.37743	-2.8091	-2.8091	-2.8091	-2.8091	-2.8091	-2.8091	1.21556	-2.8091	-2.8091	-2.8091	-2.8091	-2.8091	0.563112	1.88149	-2.8091
rno-piR-11184	-2.8091	-2.8091	-1.17414	-2.8091	-0.691621	-2.8091	-2.8091	-2.8091	-2.8091	-0.291042	1.01527	-2.8091	-2.8091	-0.857667	-2.8091	-2.8091	-2.8091	-0.401497	0.838007	-2.8091	-2.8091	-2.8091	-2.8091	-2.8091
rno-piR-11185	-2.8091	0.0587823	2.50599	1.32426	1.83985	2.25088	1.08683	-2.8091	-2.8091	-2.8091	-2.8091	5.9351	-2.8091	1.43551	-2.8091	3.65054	1.50456	1.70961	2.02303	-2.8091	-2.8091	-2.8091	-2.8091	-2.8091
rno-piR-11186	0.702996	-0.640445	1.30282	-0.817012	0.79938	0.821078	-2.8091	-2.8091	-2.8091	2.06297	-2.8091	-2.8091	-2.8091	0.570591	-2.8091	-2.8091	0.493989	-0.401497	1.34924	-2.8091	-2.8091	-2.8091	-2.8091	-2.8091
rno-piR-11187	-2.8091	-2.8091	-1.9595	-0.817012	-2.8091	-2.8091	-2.8091	-2.8091	-2.8091	-2.8091	-2.8091	-2.8091	-2.8091	-2.8091	-2.8091	-2.8091	-2.8091	-2.8091	-2.8091	-2.8091	-2.8091	-2.8091	-2.8091	-2.8091
rno-piR-11188	-2.8091	-2.8091	-1.9595	-2.8091	-2.8091	-2.8091	-2.8091	-2.8091	-2.8091	-2.8091	-2.8091	-2.8091	-2.8091	-2.8091	-2.8091	-2.8091	-2.8091	-2.8091	-2.8091	-2.8091	-2.8091	-2.8091	-2.8091	-2.8091
rno-piR-11189	-2.8091	-2.8091	-1.62376	-2.8091	-2.8091	-0.403412	-2.8091	-2.8091	-2.8091	-2.8091	2.86126	-2.8091	-2.8091	-2.8091	-2.8091	-2.8091	-2.8091	-2.8091	-2.8091	2.38485	-2.8091	-2.8091	-2.8091	-2.8091
rno-piR-1119	-0.497571	-2.8091	-1.9595	-2.8091	0.454729	0.338593	-2.8091	-2.8091	-2.8091	-2.8091	-2.8091	-2.8091	-2.8091	-2.8091	-2.8091	-2.8091	-2.8091	-2.8091	-2.8091	-0.305325	-2.8091	4.67851	-2.8091	-2.8091
rno-piR-11190	2.51144	0.705286	1.47176	2.86416	1.83985	2.85785	4.70932	2.05668	-2.8091	1.32461	-2.8091	-2.8091	-2.8091	0.570591	-2.8091	-2.8091	-0.269622	1.47041	1.34924	0.45269	-2.8091	0.563112	-2.8091	-2.8091
rno-piR-11191	-2.8091	-2.8091	-1.17414	-2.8091	-0.691621	-2.8091	-2.8091	-2.8091	-2.8091	-2.8091	-2.8091	-2.8091	-2.8091	-2.8091	-2.8091	-2.8091	-2.8091	-2.8091	-2.8091	-2.8091	-2.8091	-2.8091	-2.8091	-2.8091
rno-piR-11192	-0.497571	-0.640445	-0.380507	-2.8091	-0.00243066	-2.8091	1.08683	-2.8091	-2.8091	-2.8091	3.42752	-2.8091	-2.8091	0.570591	-2.8091	-2.8091	-0.912094	0.340829	0.0317522	3.34571	-2.8091	-2.8091	-2.8091	-2.8091
rno-piR-11193	-2.8091	-2.8091	-0.284903	-2.8091	-0.691621	-2.8091	-2.8091	-2.8091	-2.8091	-2.8091	-2.8091	-2.8091	-2.8091	-0.857667	-2.8091	-2.8091	-2.8091	-2.8091	-2.8091	-2.8091	-2.8091	-2.8091	-2.8091	-2.8091
rno-piR-11194	-0.497571	-2.8091	-2.8091	-2.8091	-2.8091	-2.8091	-2.8091	-2.8091	-2.8091	-2.8091	-2.8091	-2.8091	-2.8091	-2.8091	-2.8091	-2.8091	-2.8091	-2.8091	-2.8091	-2.8091	-2.8091	-2.8091	-2.8091	-2.8091
rno-piR-11195	-2.8091	-2.8091	-1.9595	-2.8091	-2.8091	-2.8091	-2.8091	-2.8091	-2.8091	-2.8091	-2.8091	2.98098	-2.8091	-2.8091	-2.8091	-2.8091	-2.8091	-2.8091	-2.8091	-2.8091	-2.8091	-2.8091	-2.8091	-2.8091
rno-piR-11196	-2.8091	-2.8091	-1.9595	-2.8091	-2.8091	-2.8091	-2.8091	-2.8091	-2.8091	-2.8091	-2.8091	-2.8091	-2.8091	-0.857667	-2.8091	-2.8091	-2.8091	-2.8091	-2.8091	-2.8091	-2.8091	-2.8091	-2.8091	-2.8091
rno-piR-11197	-2.8091	-2.8091	-2.8091	-2.8091	-2.8091	-2.8091	-2.8091	-2.8091	-2.8091	-2.8091	-2.8091	-2.8091	-2.8091	-2.8091	-2.8091	-2.8091	-2.8091	0.340829	-2.8091	-2.8091	-2.8091	-2.8091	-2.8091	-2.8091
rno-piR-11198	-2.8091	0.308753	0.528722	0.627278	-0.00243066	-2.8091	-2.8091	2.05668	-2.8091	1.61494	4.14926	-2.8091	-2.8091	0.236575	-2.8091	-2.8091	0.493989	0.340829	2.26962	-2.8091	-2.8091	5.03752	-2.8091	1.83995
rno-piR-11199	-2.8091	-2.8091	-2.8091	-2.8091	-2.8091	-2.8091	-2.8091	-2.8091	5.67008	-0.291042	-2.8091	-2.8091	-2.8091	-2.8091	-2.8091	-2.8091	-2.8091	-2.8091	-2.8091	-2.8091	-2.8091	-2.8091	-2.8091	-2.8091
rno-piR-1120	-2.8091	-2.8091	-0.851482	-2.8091	-2.8091	-2.8091	-2.8091	-2.8091	-2.8091	-2.8091	-2.8091	-2.8091	-2.8091	-2.8091	-2.8091	-2.8091	-2.8091	0.340829	-2.8091	-2.8091	-2.8091	-2.8091	-2.8091	-2.8091
rno-piR-11200	-2.8091	-2.8091	-2.8091	-2.8091	-2.8091	-2.8091	-2.8091	-2.8091	-2.8091	-2.8091	-2.8091	-2.8091	-2.8091	-2.8091	-2.8091	-2.8091	-2.8091	-2.8091	0.838007	-2.8091	-2.8091	-2.8091	-2.8091	-2.8091
rno-piR-11201	-0.497571	-1.21021	-1.9595	-0.817012	-2.8091	-2.8091	-2.8091	-2.8091	-2.8091	-2.8091	-2.8091	-2.8091	-2.8091	-2.8091	-2.8091	-2.8091	-0.912094	-2.8091	-2.8091	-2.8091	-2.8091	-2.8091	-2.8091	-2.8091
rno-piR-11202	0.228153	-2.8091	-1.9595	-2.8091	-2.8091	-2.8091	-2.8091	-2.8091	-2.8091	-2.8091	-2.8091	-2.8091	-2.8091	-0.857667	-2.8091	-2.8091	-2.8091	-2.8091	-2.8091	-2.8091	-2.8091	-2.8091	-2.8091	-2.8091
rno-piR-11204	-2.8091	-2.8091	-1.62376	-2.8091	-0.00243066	-2.8091	-2.8091	-2.8091	-2.8091	-2.8091	-2.8091	-2.8091	-2.8091	-2.8091	-2.8091	-2.8091	-2.8091	-2.8091	-2.8091	-2.8091	-2.8091	-2.8091	-2.8091	-2.8091
rno-piR-11205	-2.8091	-2.8091	-2.8091	-2.8091	-2.8091	-2.8091	-2.8091	-2.8091	-2.8091	-2.8091	-2.8091	-2.8091	-2.8091	-2.8091	-2.8091	-2.8091	-2.8091	-0.401497	-2.8091	-2.8091	-2.8091	-2.8091	-2.8091	-2.8091
rno-piR-11206	-2.8091	-2.8091	-1.62376	-2.8091	-0.691621	-2.8091	-2.8091	-2.8091	-2.8091	-2.8091	-2.8091	-2.8091	-2.8091	-2.8091	-2.8091	-2.8091	0.163835	-0.401497	-2.8091	-2.8091	-2.8091	-2.8091	-2.8091	-2.8091
rno-piR-11209	-2.8091	-2.8091	-1.62376	-2.8091	-2.8091	-2.8091	-2.8091	-2.8091	-2.8091	-2.8091	-2.8091	-2.8091	-2.8091	-2.8091	-2.8091	-2.8091	-2.8091	-2.8091	-2.8091	-2.8091	-2.8091	-2.8091	-2.8091	-2.8091
rno-piR-11210	-2.8091	-2.8091	-1.00219	-2.8091	-0.00243066	-2.8091	-2.8091	-2.8091	-2.8091	-2.8091	-2.8091	-2.8091	-2.8091	-2.8091	-2.8091	-2.8091	-2.8091	-2.8091	-2.8091	-2.8091	-2.8091	-2.8091	-2.8091	-2.8091
rno-piR-11211	-2.8091	-1.21021	-1.9595	-0.153685	-0.691621	0.821078	-2.8091	-2.8091	-2.8091	-0.291042	-2.8091	-2.8091	-2.8091	-2.8091	-2.8091	-2.8091	-2.8091	0.340829	-2.8091	-2.8091	-2.8091	-2.8091	-2.8091	-2.8091
rno-piR-11212	0.702996	0.0587823	0.421916	1.32426	0.454729	-0.403412	-2.8091	-2.8091	-2.8091	-2.8091	-2.8091	-2.8091	-2.8091	0.236575	-2.8091	3.08165	0.986392	1.47041	1.72527	-2.8091	-2.8091	-2.8091	-2.8091	-2.8091
rno-piR-11213	-2.8091	-2.8091	-0.380507	-2.8091	-0.00243066	-2.8091	3.25166	2.05668	-2.8091	-0.291042	2.46457	-2.8091	-2.8091	-0.203124	-2.8091	-2.8091	-0.912094	-2.8091	0.0317522	0.45269	-2.8091	2.35186	-2.8091	2.38734
rno-piR-11214	0.228153	0.308753	0.180423	-0.153685	-0.00243066	0.821078	-2.8091	-2.8091	-2.8091	-2.8091	-2.8091	-2.8091	-2.8091	0.840636	-2.8091	1.74324	0.163835	-0.401497	0.838007	-2.8091	-2.8091	-2.8091	-2.8091	-2.8091
rno-piR-11215	-0.497571	-2.8091	-1.9595	-2.8091	-2.8091	-2.8091	-2.8091	-2.8091	-2.8091	-2.8091	-2.8091	-2.8091	-2.8091	-2.8091	-2.8091	-2.8091	-2.8091	-2.8091	-2.8091	-2.8091	-2.8091	-2.8091	-2.8091	-2.8091
rno-piR-11217	-2.8091	-2.8091	-1.62376	-2.8091	-2.8091	-2.8091	-2.8091	-2.8091	-2.8091	-2.8091	-2.8091	-2.8091	-2.8091	-2.8091	-2.8091	-2.8091	-2.8091	-2.8091	0.0317522	-2.8091	-2.8091	-2.8091	-2.8091	-2.8091
rno-piR-11218	1.96108	-2.8091	-1.9595	-2.8091	-2.8091	-2.8091	3.91363	-2.8091	-2.8091	-2.8091	-2.8091	-2.8091	-2.8091	1.06754	-2.8091	-2.8091	-0.912094	-2.8091	-2.8091	-2.8091	-2.8091	-2.8091	-2.8091	-2.8091
rno-piR-1122	-2.8091	-2.8091	-1.62376	-0.817012	-2.8091	-0.403412	-2.8091	-2.8091	-2.8091	-2.8091	-2.8091	-2.8091	-2.8091	-0.203124	-2.8091	-2.8091	-2.8091	-2.8091	-2.8091	-2.8091	-2.8091	-2.8091	-2.8091	-2.8091
rno-piR-11221	-2.8091	-2.8091	-2.8091	-2.8091	-0.691621	-2.8091	1.99161	-2.8091	-2.8091	-0.291042	-2.8091	-2.8091	-2.8091	-2.8091	-2.8091	-2.8091	-2.8091	-2.8091	0.0317522	-2.8091	-2.8091	-2.8091	-2.8091	-2.8091
rno-piR-11222	-2.8091	-2.8091	-1.62376	-2.8091	-0.691621	-2.8091	-2.8091	-2.8091	-2.8091	-2.8091	-2.8091	-2.8091	-2.8091	-0.203124	-2.8091	-2.8091	-2.8091	-2.8091	-2.8091	-2.8091	-2.8091	-2.8091	-2.8091	-2.8091
rno-piR-11223	-2.8091	-2.8091	-2.8091	-2.8091	-2.8091	-2.8091	-2.8091	-2.8091	-2.8091	-2.8091	-2.8091	-2.8091	-2.8091	-2.8091	-2.8091	-2.8091	-0.269622	-0.401497	-2.8091	-2.8091	-2.8091	-2.8091	-2.8091	-2.8091
rno-piR-11224	2.51144	1.0149	2.49299	3.43046	1.68365	1.46788	-2.8091	-2.8091	-2.8091	0.960112	-2.8091	-2.8091	-2.8091	2.44331	-2.8091	-2.8091	1.50456	1.91462	1.34924	-2.8091	-2.8091	-2.8091	-2.8091	-2.8091
rno-piR-11225	-2.8091	-2.8091	0.36532	-0.817012	-0.691621	-2.8091	-2.8091	-2.8091	-2.8091	-2.8091	-2.8091	-2.8091	-2.8091	-0.857667	-2.8091	-2.8091	0.163835	-0.401497	-2.8091	-2.8091	-2.8091	-2.8091	-2.8091	-2.8091
rno-piR-11226	-2.8091	-2.8091	-2.8091	-0.817012	-0.691621	-2.8091	-2.8091	-2.8091	-2.8091	-2.8091	-2.8091	-2.8091	-2.8091	-0.857667	-2.8091	-2.8091	-2.8091	-2.8091	-2.8091	-2.8091	-2.8091	-2.8091	-2.8091	-2.8091
rno-piR-11228	-2.8091	-1.21021	-2.8091	-0.817012	-2.8091	-2.8091	-2.8091	-2.8091	-2.8091	-2.8091	-2.8091	-2.8091	-2.8091	-2.8091	-2.8091	-2.8091	-2.8091	-2.8091	0.0317522	-2.8091	-2.8091	-2.8091	-2.8091	-2.8091
rno-piR-1123	-2.8091	-2.8091	-0.851482	-2.8091	1.07661	-2.8091	-2.8091	-2.8091	-2.8091	-2.8091	-2.8091	-2.8091	-2.8091	-2.8091	-2.8091	-2.8091	0.493989	0.823464	-2.8091	-2.8091	-2.8091	-2.8091	-2.8091	-2.8091
rno-piR-11230	-2.8091	-2.8091	-1.9595	-2.8091	-2.8091	-2.8091	-2.8091	-2.8091	-2.8091	-2.8091	-2.8091	-2.8091	-2.8091	-2.8091	-2.8091	-2.8091	-0.269622	-0.401497	0.0317522	-2.8091	-2.8091	-2.8091	-2.8091	-2.8091
rno-piR-11231	-2.8091	-2.8091	-2.8091	-2.8091	-2.8091	-0.403412	-2.8091	-2.8091	-2.8091	-2.8091	-2.8091	-2.8091	-2.8091	-2.8091	-2.8091	-2.8091	-2.8091	-2.8091	-2.8091	-2.8091	-2.8091	-2.8091	-2.8091	-2.8091
rno-piR-11232	0.228153	-2.8091	-2.8091	-2.8091	-0.691621	-2.8091	-2.8091	-2.8091	-2.8091	-2.8091	-2.8091	-2.8091	-2.8091	-2.8091	-2.8091	-2.8091	-2.8091	-2.8091	-2.8091	-2.8091	-2.8091	-2.8091	-2.8091	-2.8091
rno-piR-11234	0.228153	-2.8091	-0.716865	-2.8091	-2.8091	-2.8091	-2.8091	-2.8091	-2.8091	-2.8091	-2.8091	-2.8091	-2.8091	-2.8091	-2.8091	1.74324	-0.912094	-2.8091	-2.8091	-2.8091	-2.8091	-2.8091	-2.8091	-2.8091
rno-piR-11235	-2.8091	-1.21021	-0.111754	-0.817012	0.454729	-2.8091	-2.8091	-2.8091	2.2881	-2.8091	-2.8091	-2.8091	-2.8091	-0.203124	-2.8091	-2.8091	-2.8091	-0.401497	-2.8091	-2.8091	-2.8091	-2.8091	-2.8091	-2.8091
rno-piR-11237	-0.497571	-2.8091	-0.284903	-2.8091	-0.691621	-0.403412	-2.8091	-2.8091	-2.8091	2.06297	-2.8091	-2.8091	-2.8091	-0.203124	-2.8091	-2.8091	-2.8091	-0.401497	0.0317522	-2.8091	-2.8091	-2.8091	-2.8091	-2.8091
rno-piR-11238	0.228153	-2.8091	-1.9595	-2.8091	-2.8091	-2.8091	-2.8091	-2.8091	-2.8091	-2.8091	-2.8091	-2.8091	-2.8091	-2.8091	-2.8091	-2.8091	-2.8091	-2.8091	-2.8091	-2.8091	-2.8091	-2.8091	-2.8091	-2.8091
rno-piR-1124	0.228153	1.2692	0.967651	2.98505	0.79938	1.18072	4.08054	-2.8091	-2.8091	0.469226	-2.8091	-2.8091	-2.8091	1.06754	-2.8091	-2.8091	-0.269622	1.18319	0.838007	-2.8091	-2.8091	-2.8091	-2.8091	-2.8091
rno-piR-11240	-2.8091	0.308753	1.17801	0.899196	1.30869	2.0914	1.08683	-2.8091	-2.8091	-2.8091	2.46457	-2.8091	-2.8091	-0.203124	-2.8091	-2.8091	0.493989	-0.401497	2.6637	-2.8091	-2.8091	-2.8091	-2.8091	-2.8091
rno-piR-11241	-2.8091	-1.21021	-2.8091	-2.8091	-2.8091	-2.8091	-2.8091	-2.8091	-2.8091	-2.8091	-2.8091	-2.8091	-2.8091	-2.8091	-2.8091	-2.8091	-2.8091	-0.401497	-2.8091	-2.8091	-2.8091	-2.8091	-2.8091	-2.8091
rno-piR-11242	-0.497571	0.520875	0.807944	1.49727	1.07661	1.18072	-2.8091	1.51844	-2.8091	-2.8091	-2.8091	-2.8091	-2.8091	0.236575	-2.8091	-2.8091	-0.912094	0.823464	0.0317522	3.86386	-2.8091	-2.8091	-2.8091	-2.8091
rno-piR-11243	-2.8091	-2.8091	-2.8091	-2.8091	-2.8091	-0.403412	-2.8091	-2.8091	-2.8091	-2.8091	-2.8091	-2.8091	-2.8091	-2.8091	-2.8091	-2.8091	-2.8091	-2.8091	-2.8091	-2.8091	-2.8091	-2.8091	-2.8091	-2.8091
rno-piR-11244	-2.8091	-2.8091	-2.8091	-2.8091	-2.8091	-2.8091	-2.8091	-2.8091	-2.8091	-2.8091	-2.8091	-2.8091	-2.8091	-2.8091	-2.8091	-2.8091	-2.8091	-2.8091	0.0317522	-2.8091	-2.8091	-2.8091	-2.8091	-2.8091
rno-piR-11245	-2.8091	-2.8091	-1.9595	-2.8091	-2.8091	-2.8091	-2.8091	-2.8091	-2.8091	-2.8091	-2.8091	-2.8091	-2.8091	-0.857667	-2.8091	-2.8091	-2.8091	-2.8091	-2.8091	-2.8091	-2.8091	-2.8091	-2.8091	-2.8091
rno-piR-11246	-2.8091	-2.8091	-1.9595	-2.8091	-2.8091	-2.8091	-2.8091	-2.8091	-2.8091	-2.8091	-2.8091	-2.8091	-2.8091	-2.8091	-2.8091	-2.8091	-2.8091	-2.8091	-2.8091	-2.8091	-2.8091	-2.8091	-2.8091	-2.8091
rno-piR-11247	0.702996	-2.8091	-2.8091	-0.817012	-2.8091	-2.8091	3.72484	-2.8091	-2.8091	-2.8091	-2.8091	-2.8091	-2.8091	-2.8091	-2.8091	-2.8091	-2.8091	-2.8091	-2.8091	-2.8091	-2.8091	-2.8091	-2.8091	-2.8091
rno-piR-11249	-2.8091	-1.21021	-1.9595	-0.817012	-2.8091	-0.403412	-2.8091	-2.8091	-2.8091	-2.8091	-2.8091	-2.8091	-2.8091	-2.8091	6.20978	-2.8091	-2.8091	-2.8091	-2.8091	4.24427	-2.8091	-2.8091	-2.8091	-2.8091
rno-piR-11250	-2.8091	-2.8091	-1.37586	-2.8091	-2.8091	-2.8091	-2.8091	-2.8091	-2.8091	-2.8091	-2.8091	-2.8091	-2.8091	-2.8091	-2.8091	-2.8091	-2.8091	-2.8091	-2.8091	-2.8091	4.15506	-2.8091	-2.8091	-2.8091
rno-piR-11252	-2.8091	-2.8091	-1.37586	-2.8091	-2.8091	-2.8091	-2.8091	-2.8091	-2.8091	-2.8091	-2.8091	-2.8091	-2.8091	0.236575	-2.8091	-2.8091	-2.8091	-2.8091	-2.8091	-2.8091	-2.8091	-2.8091	-2.8091	-2.8091
rno-piR-11253	-0.497571	-1.21021	-1.17414	-0.817012	-2.8091	-2.8091	-2.8091	-2.8091	-2.8091	-2.8091	-2.8091	-2.8091	-2.8091	-2.8091	-2.8091	3.24624	-0.269622	0.340829	-2.8091	-2.8091	5.72462	-2.8091	-2.8091	-2.8091
rno-piR-11254	-2.8091	-2.8091	-2.8091	-2.8091	-0.691621	-2.8091	-2.8091	-2.8091	-2.8091	-0.291042	-2.8091	-2.8091	-2.8091	-2.8091	-2.8091	-2.8091	-2.8091	-2.8091	0.0317522	-2.8091	-2.8091	-2.8091	-2.8091	-2.8091
rno-piR-11255	-2.8091	-2.8091	-0.851482	-0.817012	-2.8091	-2.8091	1.99161	-2.8091	-2.8091	-2.8091	-2.8091	-2.8091	-2.8091	-0.857667	-2.8091	-2.8091	-0.912094	-2.8091	-2.8091	-2.8091	-2.8091	3.76005	-2.8091	-2.8091
rno-piR-11256	-2.8091	-2.8091	-2.8091	-2.8091	-2.8091	-2.8091	-2.8091	-2.8091	-2.8091	-2.8091	-2.8091	-2.8091	-2.8091	-2.8091	-2.8091	-2.8091	-2.8091	-0.401497	-2.8091	-2.8091	-2.8091	-2.8091	-2.8091	-2.8091
rno-piR-11257	-2.8091	-2.8091	-2.8091	-2.8091	-2.8091	-0.403412	-2.8091	-2.8091	-2.8091	-2.8091	-2.8091	-2.8091	-2.8091	-2.8091	-2.8091	-2.8091	-2.8091	-2.8091	-2.8091	-2.8091	-2.8091	-2.8091	-2.8091	-2.8091
rno-piR-11259	-2.8091	-2.8091	-1.9595	-2.8091	-2.8091	-2.8091	-2.8091	-2.8091	-2.8091	-2.8091	-2.8091	-2.8091	-2.8091	-2.8091	-2.8091	-2.8091	-2.8091	-2.8091	-2.8091	-2.8091	-2.8091	-2.8091	-2.8091	-2.8091
rno-piR-1126	-2.8091	-2.8091	-1.00219	-0.817012	-2.8091	0.338593	-2.8091	-2.8091	-2.8091	-2.8091	-2.8091	-2.8091	-2.8091	-0.203124	-2.8091	-2.8091	-0.912094	-0.401497	-2.8091	-2.8091	-2.8091	-2.8091	-2.8091	-2.8091
rno-piR-11260	1.05817	0.308753	2.03568	1.12746	1.30869	1.70704	1.99161	-2.8091	-2.8091	0.960112	1.01527	-2.8091	-2.8091	-0.203124	-2.8091	-2.8091	0.986392	0.823464	0.838007	3.75072	-2.8091	-2.8091	-2.8091	-2.8091
rno-piR-11261	-2.8091	-2.8091	-2.8091	-2.8091	-2.8091	-2.8091	2.94032	-2.8091	-2.8091	-2.8091	-2.8091	-2.8091	-2.8091	-2.8091	-2.8091	-2.8091	-2.8091	-2.8091	-2.8091	-2.8091	-2.8091	-2.8091	-2.8091	-2.8091
rno-piR-11264	-0.497571	-2.8091	-0.380507	-0.153685	-0.691621	-0.403412	-2.8091	-2.8091	-2.8091	-2.8091	-2.8091	-2.8091	-2.8091	-0.857667	-2.8091	-2.8091	-0.912094	-2.8091	0.0317522	0.45269	-2.8091	-2.8091	-2.8091	-2.8091
rno-piR-11265	1.34239	0.0587823	1.38978	0.290504	-0.00243066	1.91202	-2.8091	-2.8091	-2.8091	2.40414	-2.8091	-2.8091	-2.8091	-0.203124	-2.8091	-2.8091	-0.912094	-0.401497	0.0317522	-2.8091	-2.8091	-2.8091	-2.8091	-2.8091
rno-piR-11266	-2.8091	-2.8091	-1.17414	-2.8091	-0.691621	-2.8091	-2.8091	-2.8091	-2.8091	-2.8091	-2.8091	-2.8091	-2.8091	-0.857667	-2.8091	-2.8091	0.493989	-2.8091	-2.8091	-2.8091	-2.8091	-2.8091	-2.8091	-2.8091
rno-piR-11267	-2.8091	-1.21021	-1.17414	-2.8091	-2.8091	-2.8091	-2.8091	-2.8091	-2.8091	-2.8091	-2.8091	-2.8091	-2.8091	-2.8091	-2.8091	-2.8091	-0.269622	-0.401497	-2.8091	-2.8091	-2.8091	-2.8091	-2.8091	-2.8091
rno-piR-11268	-0.497571	-0.640445	0.36532	0.627278	0.454729	1.18072	1.08683	-2.8091	-2.8091	-2.8091	-2.8091	-2.8091	-2.8091	-2.8091	-2.8091	-2.8091	1.50456	0.340829	-2.8091	-2.8091	-2.8091	2.65797	-2.8091	-2.8091
rno-piR-11269	-2.8091	-2.8091	-1.00219	-0.817012	-0.691621	-2.8091	-2.8091	-2.8091	-2.8091	-2.8091	-2.8091	-2.8091	-2.8091	-2.8091	-2.8091	-2.8091	-2.8091	-2.8091	-2.8091	-2.8091	-2.8091	-2.8091	-2.8091	-2.8091
rno-piR-1127	-0.497571	-0.640445	-0.111754	1.12746	1.07661	0.338593	3.50757	-2.8091	3.81687	-0.291042	-2.8091	-2.8091	-2.8091	-0.857667	-2.8091	-2.8091	-2.8091	0.823464	0.838007	-2.8091	-2.8091	-2.8091	-2.8091	-2.8091
rno-piR-11270	-0.497571	-2.8091	-2.8091	-2.8091	-2.8091	-2.8091	-2.8091	-2.8091	-2.8091	-2.8091	-2.8091	-2.8091	-2.8091	-2.8091	-2.8091	-2.8091	-2.8091	-2.8091	-2.8091	-2.8091	-2.8091	-2.8091	-2.8091	-2.8091
rno-piR-11271	-2.8091	-2.8091	-0.716865	-2.8091	-2.8091	-2.8091	-2.8091	-2.8091	-2.8091	-2.8091	-2.8091	5.9351	-2.8091	-2.8091	-2.8091	-2.8091	-0.269622	0.340829	-2.8091	-2.8091	-2.8091	-2.8091	-2.8091	-2.8091
rno-piR-11272	-2.8091	-2.8091	-0.483425	-0.817012	-2.8091	-0.403412	-2.8091	-2.8091	-2.8091	-2.8091	-2.8091	-2.8091	-2.8091	0.236575	-2.8091	-2.8091	-2.8091	-2.8091	-2.8091	-2.8091	-2.8091	-2.8091	-2.8091	-2.8091
rno-piR-11273	-2.8091	-2.8091	-1.9595	-0.817012	-2.8091	-2.8091	-2.8091	-2.8091	-2.8091	-2.8091	-2.8091	-2.8091	-2.8091	-2.8091	-2.8091	-2.8091	-2.8091	-0.401497	-2.8091	-2.8091	-2.8091	-2.8091	-2.8091	-2.8091
rno-piR-11274	-2.8091	-2.8091	-1.62376	-2.8091	-0.691621	-0.403412	-2.8091	-2.8091	-2.8091	-2.8091	-2.8091	-2.8091	-2.8091	-2.8091	-2.8091	-2.8091	-0.912094	-2.8091	-2.8091	-2.8091	-2.8091	-2.8091	-2.8091	-2.8091
rno-piR-11277	-2.8091	-2.8091	-1.9595	-2.8091	-2.8091	-2.8091	-2.8091	-2.8091	-2.8091	-2.8091	-2.8091	-2.8091	-2.8091	-2.8091	-2.8091	-2.8091	-2.8091	-2.8091	-2.8091	-2.8091	-2.8091	-2.8091	-2.8091	-2.8091
rno-piR-11278	-2.8091	-2.8091	-2.8091	-0.817012	-2.8091	0.338593	-2.8091	0.646749	-2.8091	-2.8091	-2.8091	-2.8091	-2.8091	-2.8091	-2.8091	-2.8091	-2.8091	-2.8091	-2.8091	-2.8091	-2.8091	-2.8091	-2.8091	-2.8091
rno-piR-1128	-2.8091	-2.8091	-2.8091	-2.8091	-2.8091	-2.8091	-2.8091	-2.8091	-2.8091	2.06297	-2.8091	-2.8091	-2.8091	-2.8091	-2.8091	-2.8091	-2.8091	-2.8091	-2.8091	-2.8091	-2.8091	-2.8091	-2.8091	-2.8091
rno-piR-11280	1.05817	-2.8091	-1.00219	-2.8091	-0.691621	-2.8091	-2.8091	-2.8091	-2.8091	-2.8091	-2.8091	-2.8091	-2.8091	-2.8091	-2.8091	-2.8091	-2.8091	-0.401497	-2.8091	-2.8091	-2.8091	-2.8091	-2.8091	-2.8091
rno-piR-11281	-2.8091	-2.8091	-1.9595	-2.8091	-2.8091	-2.8091	-2.8091	-2.8091	-2.8091	-2.8091	-2.8091	-2.8091	-2.8091	-2.8091	-2.8091	-2.8091	-2.8091	-2.8091	-2.8091	-2.8091	-2.8091	-2.8091	-2.8091	-2.8091
rno-piR-11283	-2.8091	-2.8091	-2.8091	-2.8091	-2.8091	-2.8091	-2.8091	-2.8091	-2.8091	-2.8091	-2.8091	-2.8091	-2.8091	-2.8091	-2.8091	-2.8091	-0.912094	-2.8091	0.838007	-2.8091	-2.8091	-2.8091	-2.8091	-2.8091
rno-piR-11286	-2.8091	-2.8091	-2.8091	-2.8091	-0.691621	-2.8091	-2.8091	-2.8091	-2.8091	-2.8091	-2.8091	-2.8091	-2.8091	-0.857667	-2.8091	-2.8091	-2.8091	-2.8091	-2.8091	-2.8091	-2.8091	-2.8091	-2.8091	-2.8091
rno-piR-11287	-2.8091	-2.8091	-1.00219	-2.8091	-0.00243066	0.338593	-2.8091	2.75461	-2.8091	0.469226	-2.8091	5.63709	-2.8091	-2.8091	-2.8091	-2.8091	-2.8091	-2.8091	0.838007	-2.8091	-2.8091	-2.8091	-2.8091	-2.8091
rno-piR-11289	-2.8091	-2.8091	0.112934	-0.817012	-0.00243066	1.46788	3.25166	-2.8091	-2.8091	1.61494	-2.8091	5.11023	-2.8091	-0.857667	-2.8091	-2.8091	-2.8091	1.18319	1.72527	3.75072	-2.8091	4.45877	-2.8091	3.09317
rno-piR-1129	-2.8091	-2.8091	-0.851482	-2.8091	-2.8091	-2.8091	-2.8091	-2.8091	-2.8091	-2.8091	-2.8091	-2.8091	-2.8091	-2.8091	-2.8091	-2.8091	-2.8091	-2.8091	-2.8091	-2.8091	-2.8091	-2.8091	-2.8091	-2.8091
rno-piR-11292	-2.8091	-2.8091	-2.8091	-2.8091	-2.8091	-2.8091	-2.8091	-2.8091	-2.8091	-2.8091	-2.8091	-2.8091	-2.8091	-2.8091	-2.8091	-2.8091	-2.8091	-2.8091	-2.8091	-2.8091	-2.8091	2.91032	-2.8091	-2.8091
rno-piR-11294	2.62148	0.0587823	-0.284903	1.12746	0.79938	0.338593	-2.8091	-2.8091	-2.8091	0.960112	-2.8091	-2.8091	-2.8091	-2.8091	-2.8091	-2.8091	-0.912094	-0.401497	0.838007	-2.8091	-2.8091	-2.8091	-2.8091	-2.8091
rno-piR-11295	-2.8091	-1.21021	-2.8091	-2.8091	-2.8091	-2.8091	-2.8091	-2.8091	-2.8091	-2.8091	-2.8091	-2.8091	-2.8091	-2.8091	-2.8091	-2.8091	-0.912094	-0.401497	-2.8091	-2.8091	-2.8091	-2.8091	-2.8091	-2.8091
rno-piR-11297	-2.8091	-2.8091	-1.9595	-2.8091	-0.691621	-2.8091	-2.8091	-2.8091	-2.8091	-2.8091	-2.8091	-2.8091	-2.8091	-2.8091	-2.8091	-2.8091	-2.8091	-2.8091	-2.8091	-2.8091	-2.8091	-2.8091	-2.8091	-2.8091
rno-piR-11299	-0.497571	-0.640445	-1.37586	-2.8091	-2.8091	-0.403412	-2.8091	-2.8091	-2.8091	-2.8091	-2.8091	-2.8091	-2.8091	-2.8091	-2.8091	-2.8091	-0.912094	-2.8091	2.02303	-2.8091	-2.8091	-2.8091	-2.8091	-2.8091
rno-piR-113	-2.8091	-2.8091	-1.9595	-2.8091	-2.8091	-2.8091	-2.8091	-2.8091	-2.8091	-2.8091	-2.8091	-2.8091	-2.8091	-2.8091	-2.8091	-2.8091	-2.8091	-2.8091	-2.8091	-2.8091	-2.8091	-2.8091	-2.8091	-2.8091
rno-piR-1130	1.05817	1.48508	2.47987	4.25195	1.30869	2.85785	-2.8091	5.23992	-2.8091	4.92385	-2.8091	6.32582	-2.8091	2.59598	-2.8091	5.36454	1.88445	2.09402	3.44343	7.86129	10.776	5.52694	3.79729	4.20444
rno-piR-11300	-2.8091	-2.8091	-1.17414	-2.8091	-2.8091	0.338593	-2.8091	-2.8091	-2.8091	-2.8091	-2.8091	-2.8091	-2.8091	-2.8091	-2.8091	-2.8091	-2.8091	-2.8091	-2.8091	-2.8091	-2.8091	-2.8091	-2.8091	-2.8091
rno-piR-11301	-0.497571	-2.8091	-1.62376	0.290504	-0.691621	-0.403412	-2.8091	-2.8091	-2.8091	0.469226	-2.8091	-2.8091	-2.8091	-2.8091	-2.8091	-2.8091	-2.8091	-0.401497	2.48009	-2.8091	-2.8091	0.563112	-2.8091	-2.8091
rno-piR-11302	0.228153	-1.21021	-2.8091	-0.817012	-2.8091	-2.8091	-2.8091	-2.8091	-2.8091	-2.8091	-2.8091	-2.8091	-2.8091	-0.857667	-2.8091	-2.8091	-0.912094	-2.8091	1.72527	3.34571	-2.8091	-2.8091	-2.8091	-2.8091
rno-piR-11303	-2.8091	-2.8091	-1.62376	-2.8091	-2.8091	-2.8091	-2.8091	-2.8091	-2.8091	-2.8091	-2.8091	-2.8091	-2.8091	-2.8091	-2.8091	-2.8091	-0.912094	-2.8091	-2.8091	-2.8091	-2.8091	-2.8091	-2.8091	-2.8091
rno-piR-11304	-0.497571	-0.640445	0.180423	-2.8091	-0.00243066	-0.403412	1.08683	-2.8091	2.2881	-2.8091	3.99981	4.27168	-2.8091	-0.857667	-2.8091	-2.8091	-0.912094	-0.401497	1.34924	1.30646	-2.8091	2.35186	-2.8091	-2.8091
rno-piR-11306	2.1196	0.705286	1.8234	3.0419	1.68365	0.821078	3.50757	-2.8091	6.01627	2.40414	-2.8091	3.54872	-2.8091	1.85471	-2.8091	1.21556	3.5076	1.70961	1.34924	1.5964	-2.8091	3.88307	-2.8091	-2.8091
rno-piR-11307	-2.8091	-2.8091	-2.8091	-2.8091	-2.8091	-2.8091	-2.8091	-2.8091	-2.8091	-2.8091	-2.8091	-2.8091	-2.8091	-2.8091	-2.8091	-2.8091	-2.8091	-2.8091	0.0317522	-2.8091	-2.8091	-2.8091	-2.8091	-2.8091
rno-piR-11308	-2.8091	-2.8091	-1.9595	-0.817012	-2.8091	-2.8091	-2.8091	-2.8091	-2.8091	-2.8091	-2.8091	-2.8091	-2.8091	-2.8091	-2.8091	-2.8091	-2.8091	-0.401497	-2.8091	-2.8091	-2.8091	-2.8091	-2.8091	-2.8091
rno-piR-11309	-0.497571	-0.640445	-0.851482	-2.8091	-2.8091	1.46788	-2.8091	-2.8091	5.21366	0.960112	-2.8091	-2.8091	-2.8091	-0.857667	-2.8091	-2.8091	-0.269622	-2.8091	-2.8091	-2.8091	-2.8091	0.563112	-2.8091	-2.8091
rno-piR-1131	-2.8091	-2.8091	-1.9595	-2.8091	-0.691621	-0.403412	-2.8091	-2.8091	-2.8091	-2.8091	-2.8091	-2.8091	-2.8091	-0.857667	-2.8091	-2.8091	-0.269622	-0.401497	-2.8091	-2.8091	-2.8091	-2.8091	-2.8091	-2.8091
rno-piR-11310	-2.8091	-2.8091	-1.9595	-2.8091	-2.8091	-2.8091	-2.8091	-2.8091	-2.8091	-2.8091	-2.8091	-2.8091	-2.8091	-2.8091	-2.8091	-2.8091	-2.8091	-2.8091	-2.8091	-2.8091	-2.8091	-2.8091	-2.8091	-2.8091
rno-piR-11312	-2.8091	-2.8091	-2.8091	-2.8091	-2.8091	-2.8091	-2.8091	-2.8091	-2.8091	-2.8091	-2.8091	-2.8091	-2.8091	-0.203124	-2.8091	-2.8091	-2.8091	-2.8091	-2.8091	-2.8091	-2.8091	-2.8091	-2.8091	-2.8091
rno-piR-11313	0.228153	-0.246323	0.528722	-0.817012	-0.00243066	1.18072	-2.8091	-2.8091	-2.8091	-2.8091	-2.8091	-2.8091	-2.8091	1.06754	-2.8091	-2.8091	-0.912094	0.823464	0.0317522	3.49372	-2.8091	-2.8091	-2.8091	-2.8091
rno-piR-11314	-2.8091	-2.8091	-1.00219	-2.8091	-0.00243066	-2.8091	-2.8091	-2.8091	-2.8091	-2.8091	-2.8091	-2.8091	-2.8091	-2.8091	-2.8091	-2.8091	-2.8091	-2.8091	-2.8091	-2.8091	-2.8091	-2.8091	-2.8091	-2.8091
rno-piR-11316	3.41575	2.74036	2.60598	2.98505	3.29524	3.55201	3.72484	-2.8091	-2.8091	1.61494	1.9153	2.03091	-2.8091	2.73401	-2.8091	0.370133	-0.269622	1.91462	0.838007	5.12411	-2.8091	3.31183	-2.8091	-2.8091
rno-piR-11317	-0.497571	-0.246323	1.14503	-0.153685	1.07661	-0.403412	-2.8091	2.75461	-2.8091	2.67978	-2.8091	-2.8091	-2.8091	0.236575	4.41621	-2.8091	-0.269622	0.340829	-2.8091	2.38485	-2.8091	-2.8091	-2.8091	5.68481
rno-piR-11318	-2.8091	-2.8091	-2.8091	-2.8091	-2.8091	-0.403412	-2.8091	-2.8091	-2.8091	-2.8091	-2.8091	-2.8091	-2.8091	-2.8091	-2.8091	-2.8091	-2.8091	-2.8091	0.0317522	-2.8091	-2.8091	-2.8091	-2.8091	-2.8091
rno-piR-11319	-2.8091	-2.8091	-2.8091	-2.8091	-0.691621	-2.8091	-2.8091	-2.8091	-2.8091	-2.8091	-2.8091	-2.8091	-2.8091	-2.8091	-2.8091	-2.8091	-2.8091	-2.8091	-2.8091	-2.8091	-2.8091	-2.8091	-2.8091	-2.8091
rno-piR-11320	-2.8091	-2.8091	-2.8091	-2.8091	-2.8091	-2.8091	-2.8091	-2.8091	-2.8091	-2.8091	-2.8091	-2.8091	-2.8091	-2.8091	-2.8091	-2.8091	-2.8091	-0.401497	-2.8091	1.5964	-2.8091	-2.8091	-2.8091	-2.8091
rno-piR-11322	-2.8091	-2.8091	-1.17414	-0.153685	-0.00243066	-2.8091	-2.8091	-2.8091	-2.8091	-2.8091	-2.8091	-2.8091	-2.8091	-2.8091	-2.8091	-2.8091	-2.8091	-0.401497	-2.8091	4.67473	-2.8091	-2.8091	-2.8091	-2.8091
rno-piR-11323	-2.8091	-2.8091	-2.8091	-2.8091	-2.8091	-2.8091	1.99161	-2.8091	-2.8091	-2.8091	-2.8091	-2.8091	-2.8091	-2.8091	-2.8091	-2.8091	-2.8091	-2.8091	-2.8091	-2.8091	-2.8091	-2.8091	-2.8091	-2.8091
rno-piR-11324	1.34239	-1.21021	1.0767	-0.153685	1.30869	2.0914	1.08683	3.57569	-2.8091	2.67978	4.52245	6.02217	-2.8091	0.840636	-2.8091	-2.8091	0.163835	-0.401497	2.97283	5.63515	-2.8091	-2.8091	-2.8091	-2.8091
rno-piR-11326	-0.497571	-2.8091	-0.716865	-0.817012	-2.8091	-2.8091	-2.8091	-2.8091	-2.8091	-2.8091	-2.8091	-2.8091	-2.8091	-2.8091	-2.8091	-2.8091	-2.8091	-2.8091	-2.8091	-0.305325	-2.8091	-2.8091	-2.8091	1.83995
rno-piR-11329	-2.8091	-2.8091	-2.8091	-2.8091	-2.8091	-2.8091	1.08683	-2.8091	-2.8091	-2.8091	-2.8091	-2.8091	-2.8091	-2.8091	-2.8091	-2.8091	-2.8091	-2.8091	-2.8091	-0.305325	-2.8091	-2.8091	-2.8091	-2.8091
rno-piR-1133	-2.8091	-1.21021	-2.8091	-2.8091	-2.8091	-2.8091	-2.8091	-2.8091	-2.8091	-2.8091	-2.8091	-2.8091	-2.8091	-2.8091	-2.8091	-2.8091	-2.8091	-2.8091	-2.8091	-2.8091	-2.8091	-2.8091	-2.8091	-2.8091
rno-piR-11331	0.228153	-1.21021	-0.716865	-2.8091	-2.8091	-2.8091	-2.8091	-2.8091	-2.8091	0.960112	-2.8091	-2.8091	-2.8091	-0.857667	-2.8091	-2.8091	-0.269622	-2.8091	-2.8091	-2.8091	-2.8091	-2.8091	-2.8091	-2.8091
rno-piR-11332	-2.8091	-2.8091	0.476328	0.290504	0.79938	0.338593	4.08054	-2.8091	3.24626	2.06297	-2.8091	4.27168	-2.8091	-0.857667	-2.8091	3.86829	-0.912094	-2.8091	0.0317522	4.64338	-2.8091	4.60892	-2.8091	5.43258
rno-piR-11333	-2.8091	-2.8091	-1.00219	-2.8091	-2.8091	-2.8091	-2.8091	-2.8091	-2.8091	-2.8091	-2.8091	-2.8091	-2.8091	-2.8091	-2.8091	-2.8091	-2.8091	-2.8091	-2.8091	-2.8091	-2.8091	-2.8091	-2.8091	-2.8091
rno-piR-11334	-2.8091	-2.8091	-1.00219	0.290504	-0.691621	-2.8091	1.08683	-2.8091	-2.8091	-0.291042	-2.8091	-2.8091	-2.8091	-2.8091	-2.8091	-2.8091	-0.912094	-2.8091	-2.8091	-2.8091	-2.8091	1.96264	-2.8091	-2.8091
rno-piR-11337	-2.8091	-2.8091	-1.37586	-2.8091	-2.8091	-2.8091	-2.8091	-2.8091	-2.8091	-2.8091	-2.8091	-2.8091	-2.8091	-0.857667	-2.8091	-2.8091	-2.8091	-2.8091	-2.8091	-2.8091	-2.8091	-2.8091	-2.8091	-2.8091
rno-piR-11338	1.05817	0.520875	1.92379	2.73218	1.30869	0.821078	1.08683	1.51844	-2.8091	1.32461	-2.8091	-2.8091	-2.8091	-0.203124	-2.8091	2.12834	1.1807	0.340829	1.72527	3.96878	-2.8091	3.31183	-2.8091	4.64598
rno-piR-11339	-0.497571	-2.8091	-2.8091	-2.8091	-0.691621	-2.8091	-2.8091	-2.8091	-2.8091	-2.8091	-2.8091	-2.8091	-2.8091	-2.8091	-2.8091	-2.8091	-0.912094	0.340829	-2.8091	5.44823	-2.8091	-2.8091	-2.8091	-2.8091
rno-piR-1134	-2.8091	-2.8091	-1.37586	-2.8091	-2.8091	-2.8091	-2.8091	-2.8091	-2.8091	-2.8091	-2.8091	-2.8091	-2.8091	-2.8091	-2.8091	-2.8091	-2.8091	-2.8091	-2.8091	-2.8091	-2.8091	-2.8091	-2.8091	-2.8091
rno-piR-11341	-2.8091	-2.8091	-1.00219	-0.817012	-0.691621	-2.8091	-2.8091	-2.8091	-2.8091	-2.8091	-2.8091	-2.8091	-2.8091	-2.8091	-2.8091	-2.8091	-2.8091	0.340829	-2.8091	-2.8091	-2.8091	-2.8091	-2.8091	-2.8091
rno-piR-11342	-2.8091	-2.8091	-2.8091	-2.8091	-2.8091	-2.8091	-2.8091	-2.8091	-2.8091	-2.8091	-2.8091	-2.8091	-2.8091	-2.8091	-2.8091	-2.8091	-2.8091	-0.401497	-2.8091	-2.8091	-2.8091	-2.8091	-2.8091	-2.8091
rno-piR-11343	-2.8091	-2.8091	-0.851482	-2.8091	-0.691621	-2.8091	-2.8091	-2.8091	-2.8091	-2.8091	-2.8091	-2.8091	-2.8091	-0.857667	-2.8091	-2.8091	-2.8091	-2.8091	-2.8091	-2.8091	-2.8091	-2.8091	-2.8091	-2.8091
rno-piR-11344	-2.8091	-2.8091	-1.37586	-2.8091	-2.8091	-2.8091	-2.8091	-2.8091	-2.8091	-2.8091	-2.8091	-2.8091	-2.8091	-2.8091	-2.8091	-2.8091	-2.8091	-0.401497	-2.8091	-2.8091	-2.8091	-2.8091	-2.8091	-2.8091
rno-piR-11345	-2.8091	-2.8091	-1.62376	-2.8091	-2.8091	-2.8091	-2.8091	-2.8091	-2.8091	-2.8091	-2.8091	-2.8091	-2.8091	-0.857667	-2.8091	-2.8091	-2.8091	-2.8091	0.0317522	-2.8091	-2.8091	-2.8091	-2.8091	-2.8091
rno-piR-11347	1.34239	0.308753	1.59878	1.49727	0.79938	0.821078	-2.8091	2.05668	-2.8091	2.40414	-2.8091	2.03091	-2.8091	-2.8091	-2.8091	-2.8091	-2.8091	-2.8091	2.02303	1.5964	-2.8091	4.98355	-2.8091	3.56495
rno-piR-11348	0.702996	0.308753	0.579244	0.627278	0.79938	-2.8091	-2.8091	-2.8091	-2.8091	-2.8091	-2.8091	-2.8091	-2.8091	0.840636	-2.8091	-2.8091	0.7614	-0.401497	-2.8091	-2.8091	-2.8091	-2.8091	-2.8091	-2.8091
rno-piR-11349	-0.497571	-2.8091	-1.9595	-2.8091	-2.8091	-2.8091	-2.8091	-2.8091	-2.8091	-2.8091	-2.8091	-2.8091	-2.8091	-2.8091	-2.8091	-2.8091	-2.8091	-2.8091	-2.8091	-2.8091	-2.8091	-2.8091	-2.8091	-2.8091
rno-piR-11350	-2.8091	-2.8091	-1.37586	-2.8091	-2.8091	-2.8091	-2.8091	-2.8091	-2.8091	-2.8091	-2.8091	-2.8091	-2.8091	-0.857667	-2.8091	-2.8091	-2.8091	-2.8091	-2.8091	-2.8091	-2.8091	-2.8091	-2.8091	-2.8091
rno-piR-11352	0.702996	-2.8091	-1.62376	-2.8091	-0.691621	-2.8091	-2.8091	-2.8091	-2.8091	-2.8091	-2.8091	-2.8091	-2.8091	-2.8091	-2.8091	-2.8091	-2.8091	-2.8091	-2.8091	-2.8091	-2.8091	-2.8091	-2.8091	-2.8091
rno-piR-11353	-0.497571	-2.8091	-1.17414	-0.817012	-2.8091	-0.403412	-2.8091	0.646749	-2.8091	-2.8091	-2.8091	-2.8091	-2.8091	-0.857667	-2.8091	-2.8091	-2.8091	-0.401497	-2.8091	-2.8091	-2.8091	-2.8091	-2.8091	-2.8091
rno-piR-11354	-2.8091	-2.8091	-2.8091	-2.8091	-2.8091	-2.8091	-2.8091	-2.8091	-2.8091	-2.8091	-2.8091	-2.8091	-2.8091	-2.8091	-2.8091	-2.8091	-0.912094	-2.8091	-2.8091	-2.8091	-2.8091	-2.8091	-2.8091	-2.8091
rno-piR-11357	-0.497571	-2.8091	-1.17414	-2.8091	-2.8091	-2.8091	-2.8091	-2.8091	-2.8091	-2.8091	-2.8091	-2.8091	-2.8091	-2.8091	-2.8091	-2.8091	-2.8091	-2.8091	-2.8091	-2.8091	-2.8091	-2.8091	-2.8091	-2.8091
rno-piR-11358	-2.8091	-0.246323	-0.284903	-0.817012	0.79938	0.821078	-2.8091	-2.8091	6.72999	0.469226	-2.8091	-2.8091	-2.8091	-0.857667	-2.8091	-2.8091	-0.912094	0.823464	0.0317522	5.05431	-2.8091	-2.8091	-2.8091	-2.8091
rno-piR-1136	-2.8091	-1.21021	-2.8091	-0.153685	-2.8091	-2.8091	-2.8091	-2.8091	-2.8091	-2.8091	-2.8091	-2.8091	-2.8091	-2.8091	-2.8091	-2.8091	-2.8091	-2.8091	-2.8091	-2.8091	-2.8091	-2.8091	-2.8091	-2.8091
rno-piR-11360	-2.8091	-2.8091	-2.8091	-2.8091	-2.8091	-2.8091	-2.8091	-2.8091	-2.8091	-2.8091	-2.8091	-2.8091	-2.8091	-0.203124	-2.8091	-2.8091	-2.8091	-2.8091	-2.8091	-2.8091	-2.8091	-2.8091	-2.8091	-2.8091
rno-piR-11361	-0.497571	-2.8091	-1.9595	-2.8091	-2.8091	-2.8091	-2.8091	-2.8091	-2.8091	-2.8091	-2.8091	-2.8091	-2.8091	-2.8091	-2.8091	-2.8091	-2.8091	-2.8091	-2.8091	-2.8091	-2.8091	-2.8091	-2.8091	-2.8091
rno-piR-11362	0.702996	-2.8091	-1.00219	-2.8091	-2.8091	-2.8091	-2.8091	-2.8091	-2.8091	-2.8091	-2.8091	-2.8091	-2.8091	-2.8091	-2.8091	-2.8091	-2.8091	-2.8091	-2.8091	-2.8091	-2.8091	-2.8091	-2.8091	-2.8091
rno-piR-11363	-2.8091	-1.21021	-0.851482	-2.8091	-2.8091	-2.8091	-2.8091	-2.8091	-2.8091	-2.8091	-2.8091	-2.8091	-2.8091	-2.8091	-2.8091	-2.8091	-0.912094	0.340829	-2.8091	-2.8091	-2.8091	-2.8091	-2.8091	-2.8091
rno-piR-11364	-2.8091	-2.8091	-0.716865	-2.8091	-2.8091	-2.8091	-2.8091	-2.8091	-2.8091	-2.8091	-2.8091	-2.8091	-2.8091	-0.857667	-2.8091	-2.8091	-0.912094	-2.8091	-2.8091	-2.8091	-2.8091	-2.8091	-2.8091	-2.8091
rno-piR-11366	-2.8091	-2.8091	-1.62376	-0.817012	-2.8091	-0.403412	1.08683	-2.8091	3.24626	-2.8091	-2.8091	-2.8091	-2.8091	-2.8091	-2.8091	-2.8091	-0.912094	-2.8091	1.34924	3.56238	-2.8091	-2.8091	-2.8091	2.38734
rno-piR-11368	-2.8091	-2.8091	-0.380507	-0.817012	-0.00243066	-0.403412	-2.8091	-2.8091	-2.8091	-2.8091	-2.8091	-2.8091	-2.8091	-2.8091	-2.8091	-2.8091	-2.8091	-2.8091	-2.8091	-2.8091	-2.8091	-2.8091	-2.8091	-2.8091
rno-piR-11369	-2.8091	-0.246323	0.476328	-0.817012	0.79938	0.338593	-2.8091	-2.8091	-2.8091	-2.8091	-2.8091	-2.8091	-2.8091	0.236575	-2.8091	-2.8091	0.7614	0.823464	-2.8091	2.89147	-2.8091	-2.8091	-2.8091	-2.8091
rno-piR-1137	-2.8091	-2.8091	-0.716865	-0.817012	-2.8091	-2.8091	2.54268	2.75461	-2.8091	0.960112	-2.8091	-2.8091	-2.8091	-0.857667	-2.8091	-2.8091	0.163835	-0.401497	0.0317522	4.06657	-2.8091	1.42735	-2.8091	4.32813
rno-piR-11370	0.702996	-2.8091	-1.62376	-2.8091	-0.691621	-0.403412	-2.8091	-2.8091	-2.8091	-2.8091	-2.8091	-2.8091	-2.8091	-2.8091	-2.8091	-2.8091	-2.8091	-2.8091	0.838007	1.83752	-2.8091	0.563112	-2.8091	-2.8091
rno-piR-11371	-2.8091	-2.8091	-1.9595	-2.8091	-0.00243066	-2.8091	-2.8091	-2.8091	-2.8091	-2.8091	-2.8091	-2.8091	-2.8091	-2.8091	-2.8091	-2.8091	-2.8091	-2.8091	-2.8091	-2.8091	-2.8091	-2.8091	-2.8091	-2.8091
rno-piR-11373	-2.8091	-2.8091	-2.8091	-2.8091	-2.8091	-2.8091	-2.8091	-2.8091	-2.8091	-2.8091	-2.8091	-2.8091	-2.8091	-2.8091	-2.8091	4.05744	-2.8091	-0.401497	-2.8091	-2.8091	-2.8091	-2.8091	-2.8091	-2.8091
rno-piR-11375	-2.8091	-2.8091	-1.9595	-2.8091	-2.8091	-2.8091	-2.8091	-2.8091	-2.8091	-2.8091	-2.8091	-2.8091	-2.8091	-2.8091	-2.8091	-2.8091	-2.8091	-2.8091	-2.8091	-2.8091	-2.8091	-2.8091	-2.8091	-2.8091
rno-piR-11377	-2.8091	-2.8091	-1.9595	-2.8091	-2.8091	-2.8091	-2.8091	-2.8091	-2.8091	-2.8091	-2.8091	-2.8091	-2.8091	-2.8091	-2.8091	-2.8091	-2.8091	-2.8091	-2.8091	-2.8091	-2.8091	-2.8091	-2.8091	-2.8091
rno-piR-11379	-2.8091	-2.8091	-1.9595	-2.8091	-2.8091	-2.8091	-2.8091	-2.8091	-2.8091	-2.8091	-2.8091	-2.8091	-2.8091	-0.857667	-2.8091	-2.8091	-2.8091	-2.8091	-2.8091	-2.8091	-2.8091	-2.8091	-2.8091	-2.8091
rno-piR-1138	-2.8091	-2.8091	-1.62376	-2.8091	-2.8091	-2.8091	-2.8091	-2.8091	-2.8091	-2.8091	-2.8091	-2.8091	-2.8091	-2.8091	-2.8091	2.68242	-2.8091	-0.401497	-2.8091	-2.8091	-2.8091	-2.8091	-2.8091	-2.8091
rno-piR-11380	-2.8091	-1.21021	0.244802	-2.8091	1.50838	-0.403412	-2.8091	0.646749	-2.8091	-2.8091	-2.8091	-2.8091	-2.8091	-0.857667	-2.8091	-2.8091	0.986392	0.340829	0.0317522	-2.8091	-2.8091	-2.8091	1.88149	-2.8091
rno-piR-11381	-0.497571	-2.8091	-1.62376	-2.8091	-0.691621	-0.403412	-2.8091	-2.8091	-2.8091	-0.291042	-2.8091	-2.8091	-2.8091	-2.8091	-2.8091	-2.8091	-0.912094	-2.8091	-2.8091	0.942549	-2.8091	-2.8091	-2.8091	-2.8091
rno-piR-11383	-0.497571	-2.8091	-1.37586	-2.8091	-0.691621	-2.8091	-2.8091	-2.8091	-2.8091	0.960112	-2.8091	-2.8091	-2.8091	-0.857667	-2.8091	-2.8091	-0.912094	-2.8091	-2.8091	-2.8091	-2.8091	-2.8091	-2.8091	-2.8091
rno-piR-11384	-0.497571	-0.246323	-0.716865	0.290504	-0.00243066	-0.403412	-2.8091	-2.8091	-2.8091	-0.291042	-2.8091	-2.8091	-2.8091	-0.857667	-2.8091	-2.8091	0.163835	0.340829	-2.8091	-2.8091	-2.8091	-2.8091	-2.8091	-2.8091
rno-piR-11385	2.51144	0.0587823	1.44495	0.627278	1.50838	1.18072	-2.8091	-2.8091	-2.8091	-0.291042	-2.8091	-2.8091	-2.8091	1.58924	-2.8091	-2.8091	0.986392	1.18319	2.26962	-0.305325	-2.8091	-2.8091	-2.8091	-2.8091
rno-piR-11386	0.228153	-1.21021	-0.594968	-2.8091	-2.8091	-0.403412	-2.8091	-2.8091	-2.8091	-2.8091	-2.8091	-2.8091	-2.8091	-2.8091	-2.8091	-2.8091	-0.912094	-2.8091	-2.8091	-2.8091	-2.8091	-2.8091	-2.8091	-2.8091
rno-piR-11387	-0.497571	-2.8091	-1.9595	-0.817012	-0.691621	-2.8091	-2.8091	-2.8091	-2.8091	-2.8091	-2.8091	-2.8091	-2.8091	-2.8091	-2.8091	-2.8091	-2.8091	-2.8091	-2.8091	-2.8091	-2.8091	-2.8091	-2.8091	-2.8091
rno-piR-11388	1.7829	0.308753	1.44495	-0.153685	1.07661	0.338593	1.08683	2.75461	-2.8091	-2.8091	5.20752	-2.8091	-2.8091	0.236575	-2.8091	-2.8091	0.986392	0.340829	1.72527	-2.8091	-2.8091	-2.8091	-2.8091	-2.8091
rno-piR-11389	0.228153	-2.8091	-1.62376	-2.8091	-2.8091	-2.8091	-2.8091	-2.8091	-2.8091	-2.8091	-2.8091	-2.8091	-2.8091	-0.857667	-2.8091	-2.8091	-2.8091	-2.8091	-2.8091	-2.8091	-2.8091	-2.8091	-2.8091	-2.8091
rno-piR-1139	-2.8091	-2.8091	-0.851482	-2.8091	-0.691621	-0.403412	-2.8091	-2.8091	-2.8091	-2.8091	-2.8091	-2.8091	-2.8091	-2.8091	-2.8091	-2.8091	-2.8091	-0.401497	-2.8091	-2.8091	-2.8091	-2.8091	-2.8091	-2.8091
rno-piR-11390	-2.8091	-2.8091	-1.62376	-2.8091	-2.8091	-2.8091	-2.8091	-2.8091	-2.8091	-2.8091	-2.8091	-2.8091	-2.8091	-2.8091	-2.8091	-2.8091	-2.8091	-2.8091	0.0317522	-2.8091	-2.8091	-2.8091	-2.8091	-2.8091
rno-piR-11391	-2.8091	-1.21021	-1.00219	-2.8091	-2.8091	0.821078	-2.8091	0.646749	2.2881	0.469226	3.17201	3.95503	-2.8091	-2.8091	-2.8091	-2.8091	-2.8091	-0.401497	0.838007	0.45269	-2.8091	1.42735	-2.8091	-2.8091
rno-piR-11393	1.05817	-1.21021	-0.594968	-0.817012	-2.8091	-0.403412	3.72484	-2.8091	-2.8091	-2.8091	-2.8091	5.5223	-2.8091	0.236575	-2.8091	1.21556	-2.8091	-0.401497	0.838007	2.78052	-2.8091	-2.8091	-2.8091	-2.8091
rno-piR-11394	-2.8091	-0.246323	-0.111754	-0.153685	1.07661	-0.403412	-2.8091	-2.8091	-2.8091	-2.8091	-2.8091	-2.8091	-2.8091	0.840636	-2.8091	-2.8091	-0.912094	0.340829	0.0317522	-2.8091	-2.8091	-2.8091	-2.8091	-2.8091
rno-piR-11395	-2.8091	-2.8091	-2.8091	-0.817012	-2.8091	-2.8091	-2.8091	-2.8091	-2.8091	-2.8091	-2.8091	-2.8091	-2.8091	-2.8091	-2.8091	-2.8091	-2.8091	-2.8091	-2.8091	-0.305325	-2.8091	-2.8091	-2.8091	-2.8091
rno-piR-11398	-2.8091	-1.21021	-0.0327353	-2.8091	-0.691621	-0.403412	-2.8091	-2.8091	-2.8091	-2.8091	-2.8091	-2.8091	-2.8091	0.570591	-2.8091	-2.8091	-2.8091	0.340829	1.72527	-2.8091	-2.8091	4.37741	-2.8091	3.56495
rno-piR-11399	-2.8091	-2.8091	-1.62376	-2.8091	-2.8091	-2.8091	-2.8091	-2.8091	-2.8091	-2.8091	-2.8091	-2.8091	-2.8091	-2.8091	-2.8091	-2.8091	-2.8091	-2.8091	0.0317522	-0.305325	-2.8091	-2.8091	-2.8091	-2.8091
rno-piR-114	-2.8091	-2.8091	0.0420094	-2.8091	-0.691621	-2.8091	-2.8091	-2.8091	-2.8091	-2.8091	-2.8091	-2.8091	-2.8091	-2.8091	-2.8091	-2.8091	-0.912094	0.340829	0.838007	-2.8091	-2.8091	-2.8091	-2.8091	-2.8091
rno-piR-1140	-2.8091	-0.640445	-1.17414	-2.8091	-0.00243066	-2.8091	-2.8091	1.51844	-2.8091	-0.291042	4.28467	2.03091	-2.8091	-2.8091	-2.8091	-2.8091	-2.8091	-2.8091	0.838007	-2.8091	-2.8091	-2.8091	-2.8091	-2.8091
rno-piR-11400	-2.8091	-2.8091	-2.8091	-2.8091	-0.691621	-2.8091	-2.8091	-2.8091	-2.8091	-2.8091	-2.8091	-2.8091	-2.8091	-2.8091	-2.8091	-2.8091	-2.8091	-0.401497	0.0317522	-2.8091	-2.8091	-2.8091	-2.8091	-2.8091
rno-piR-11401	0.228153	-0.246323	1.41763	-0.817012	1.07661	-0.403412	2.54268	-2.8091	-2.8091	-2.8091	-2.8091	-2.8091	-2.8091	-0.203124	-2.8091	-2.8091	-0.269622	0.823464	-2.8091	-0.305325	-2.8091	-2.8091	-2.8091	-2.8091
rno-piR-11402	-2.8091	-1.21021	-1.9595	-2.8091	-2.8091	-2.8091	-2.8091	-2.8091	-2.8091	-2.8091	-2.8091	-2.8091	-2.8091	-2.8091	-2.8091	-2.8091	-2.8091	-2.8091	-2.8091	-2.8091	-2.8091	-2.8091	-2.8091	-2.8091
rno-piR-11403	-2.8091	-2.8091	-1.37586	-0.817012	-0.00243066	-2.8091	-2.8091	-2.8091	-2.8091	-2.8091	1.9153	-2.8091	-2.8091	-2.8091	-2.8091	-2.8091	-2.8091	-2.8091	-2.8091	3.34571	-2.8091	-2.8091	-2.8091	-2.8091
rno-piR-11406	-0.497571	-2.8091	-2.8091	-2.8091	-2.8091	-2.8091	-2.8091	-2.8091	-2.8091	-2.8091	-2.8091	-2.8091	-2.8091	-2.8091	-2.8091	-2.8091	-2.8091	-2.8091	-2.8091	-2.8091	-2.8091	-2.8091	-2.8091	-2.8091
rno-piR-11408	-2.8091	-2.8091	-1.9595	-2.8091	-2.8091	-2.8091	-2.8091	-2.8091	-2.8091	-2.8091	1.9153	-2.8091	-2.8091	-2.8091	-2.8091	-2.8091	-2.8091	-2.8091	-2.8091	-2.8091	-2.8091	-2.8091	-2.8091	-2.8091
rno-piR-11409	0.228153	1.91491	1.73772	2.50836	0.79938	-0.403412	-2.8091	-2.8091	-2.8091	2.54854	-2.8091	-2.8091	-2.8091	0.840636	-2.8091	-2.8091	0.7614	1.18319	0.0317522	-2.8091	-2.8091	-2.8091	-2.8091	-2.8091
rno-piR-11410	-0.497571	-2.8091	-2.8091	-2.8091	-0.691621	-2.8091	-2.8091	-2.8091	-2.8091	-2.8091	-2.8091	-2.8091	-2.8091	-2.8091	-2.8091	-2.8091	-2.8091	-2.8091	-2.8091	-2.8091	-2.8091	-2.8091	-2.8091	-2.8091
rno-piR-11411	-2.8091	-2.8091	-2.8091	-2.8091	-2.8091	-2.8091	-2.8091	-2.8091	-2.8091	-2.8091	-2.8091	-2.8091	-2.8091	-2.8091	-2.8091	-2.8091	-0.912094	-2.8091	-2.8091	-2.8091	-2.8091	-2.8091	-2.8091	-2.8091
rno-piR-11412	1.7829	-2.8091	0.890033	-0.817012	1.83985	1.70704	-2.8091	-2.8091	-2.8091	0.469226	3.42752	-2.8091	-2.8091	0.840636	-2.8091	-2.8091	0.163835	0.340829	1.34924	-2.8091	-2.8091	-2.8091	-2.8091	5.25694
rno-piR-11413	-0.497571	-2.8091	-2.8091	-2.8091	-2.8091	-2.8091	-2.8091	-2.8091	-2.8091	-2.8091	-2.8091	-2.8091	-2.8091	-2.8091	-2.8091	-2.8091	-2.8091	-2.8091	-2.8091	-2.8091	-2.8091	-2.8091	-2.8091	-2.8091
rno-piR-11414	-2.8091	-2.8091	-2.8091	-2.8091	-2.8091	-2.8091	-2.8091	-2.8091	-2.8091	-2.8091	-2.8091	-2.8091	-2.8091	-2.8091	-2.8091	-2.8091	-2.8091	-0.401497	-2.8091	-2.8091	-2.8091	-2.8091	-2.8091	-2.8091
rno-piR-11415	1.34239	-1.21021	-1.17414	-0.817012	-0.691621	0.338593	-2.8091	-2.8091	-2.8091	-2.8091	-2.8091	-2.8091	-2.8091	-2.8091	-2.8091	1.74324	-0.912094	0.823464	-2.8091	-2.8091	-2.8091	-2.8091	-2.8091	-2.8091
rno-piR-11416	-2.8091	-2.8091	-2.8091	-2.8091	-0.691621	-0.403412	-2.8091	-2.8091	-2.8091	-2.8091	-2.8091	-2.8091	-2.8091	-2.8091	-2.8091	-2.8091	-0.912094	-2.8091	-2.8091	-2.8091	-2.8091	-2.8091	-2.8091	-2.8091
rno-piR-11418	-2.8091	-2.8091	-0.851482	-2.8091	-2.8091	-2.8091	-2.8091	-2.8091	-2.8091	-2.8091	-2.8091	-2.8091	-2.8091	-0.857667	-2.8091	-2.8091	-2.8091	-0.401497	-2.8091	-2.8091	-2.8091	-2.8091	-2.8091	-2.8091
rno-piR-11419	-2.8091	-2.8091	-2.8091	-2.8091	-2.8091	-2.8091	-2.8091	-2.8091	-2.8091	-2.8091	-2.8091	-2.8091	-2.8091	-2.8091	-2.8091	-2.8091	-2.8091	-2.8091	-2.8091	-2.8091	-2.8091	2.91032	-2.8091	-2.8091
rno-piR-1142	-2.8091	-2.8091	-1.9595	-2.8091	-2.8091	-2.8091	-2.8091	-2.8091	-2.8091	-0.291042	-2.8091	-2.8091	-2.8091	-2.8091	-2.8091	-2.8091	-2.8091	-2.8091	-2.8091	-2.8091	-2.8091	-2.8091	-2.8091	-2.8091
rno-piR-11421	0.228153	-1.21021	-1.9595	-2.8091	-2.8091	-2.8091	-2.8091	-2.8091	-2.8091	-2.8091	-2.8091	-2.8091	-2.8091	-2.8091	-2.8091	-2.8091	-2.8091	-2.8091	-2.8091	-2.8091	-2.8091	-2.8091	-2.8091	-2.8091
rno-piR-11422	4.12497	1.2692	2.34164	1.9181	2.43696	3.35557	1.08683	2.44751	-2.8091	2.91107	-2.8091	3.95503	-2.8091	1.26331	4.41621	3.76352	1.99163	2.7579	3.10564	4.11309	-2.8091	2.35186	4.592	4.54761
rno-piR-11425	-2.8091	-2.8091	-1.9595	-2.8091	-0.691621	-2.8091	2.54268	-2.8091	-2.8091	2.40414	3.99981	-2.8091	-2.8091	-2.8091	-2.8091	-2.8091	-2.8091	-2.8091	0.0317522	5.35454	-2.8091	0.563112	-2.8091	-2.8091
rno-piR-11426	-2.8091	-2.8091	-1.9595	-2.8091	-2.8091	-2.8091	-2.8091	-2.8091	-2.8091	-2.8091	-2.8091	-2.8091	-2.8091	-2.8091	-2.8091	-2.8091	-2.8091	-2.8091	-2.8091	-2.8091	-2.8091	-2.8091	-2.8091	-2.8091
rno-piR-11429	1.57947	0.0587823	0.0420094	-0.817012	0.454729	-2.8091	1.08683	-2.8091	5.79493	0.469226	1.9153	3.54872	-2.8091	-0.203124	-2.8091	-2.8091	0.493989	1.47041	1.34924	2.52915	-2.8091	0.563112	-2.8091	-2.8091
rno-piR-11431	-2.8091	-2.8091	-2.8091	-2.8091	-2.8091	-2.8091	-2.8091	-2.8091	-2.8091	-2.8091	-2.8091	2.98098	-2.8091	-2.8091	-2.8091	-2.8091	-2.8091	-2.8091	-2.8091	-2.8091	-2.8091	-2.8091	-2.8091	-2.8091
rno-piR-11433	-2.8091	-2.8091	-0.594968	-0.817012	0.454729	-0.403412	-2.8091	-2.8091	-2.8091	2.40414	-2.8091	-2.8091	-2.8091	0.236575	-2.8091	-2.8091	-2.8091	-2.8091	0.838007	-2.8091	-2.8091	0.563112	-2.8091	-2.8091
rno-piR-11434	-2.8091	-2.8091	-2.8091	-2.8091	-2.8091	-2.8091	-2.8091	-2.8091	-2.8091	-2.8091	1.01527	-2.8091	-2.8091	-2.8091	-2.8091	0.370133	-2.8091	-2.8091	-2.8091	-2.8091	-2.8091	-2.8091	-2.8091	-2.8091
rno-piR-11435	-2.8091	-2.8091	-1.62376	-2.8091	-2.8091	-2.8091	-2.8091	-2.8091	-2.8091	-2.8091	-2.8091	-2.8091	-2.8091	0.236575	-2.8091	-2.8091	-2.8091	-2.8091	-2.8091	-2.8091	-2.8091	-2.8091	-2.8091	-2.8091
rno-piR-11436	-0.497571	-2.8091	-0.851482	-0.817012	-0.691621	-2.8091	-2.8091	-2.8091	3.24626	-2.8091	-2.8091	-2.8091	-2.8091	-2.8091	-2.8091	-2.8091	-2.8091	-0.401497	-2.8091	-2.8091	-2.8091	1.42735	-2.8091	-2.8091
rno-piR-11437	-2.8091	-1.21021	-0.380507	0.290504	-2.8091	-2.8091	-2.8091	-2.8091	-2.8091	0.469226	-2.8091	5.84244	-2.8091	-2.8091	-2.8091	-2.8091	-2.8091	-2.8091	0.0317522	4.90368	-2.8091	-2.8091	-2.8091	3.56495
rno-piR-11438	-2.8091	-2.8091	-1.9595	-2.8091	-0.00243066	-2.8091	-2.8091	-2.8091	-2.8091	-2.8091	-2.8091	-2.8091	-2.8091	-2.8091	-2.8091	-2.8091	-0.912094	-0.401497	-2.8091	-2.8091	-2.8091	-2.8091	-2.8091	-2.8091
rno-piR-11439	-0.497571	-2.8091	-1.62376	-2.8091	-0.691621	0.338593	-2.8091	-2.8091	-2.8091	1.32461	-2.8091	-2.8091	-2.8091	-2.8091	-2.8091	-2.8091	-2.8091	-2.8091	-2.8091	-2.8091	-2.8091	-2.8091	-2.8091	-2.8091
rno-piR-1144	-2.8091	-2.8091	-1.9595	-2.8091	-0.00243066	-2.8091	-2.8091	-2.8091	-2.8091	-2.8091	-2.8091	-2.8091	-2.8091	-2.8091	-2.8091	-2.8091	-2.8091	-2.8091	-2.8091	-2.8091	-2.8091	-2.8091	-2.8091	-2.8091
rno-piR-11441	-2.8091	-2.8091	-1.17414	-2.8091	-2.8091	-2.8091	-2.8091	-2.8091	-2.8091	-2.8091	-2.8091	-2.8091	-2.8091	-0.857667	-2.8091	-2.8091	-0.912094	-0.401497	-2.8091	-2.8091	-2.8091	-2.8091	-2.8091	-2.8091
rno-piR-11443	-2.8091	-2.8091	-1.9595	-2.8091	-2.8091	-2.8091	-2.8091	-2.8091	-2.8091	-0.291042	-2.8091	-2.8091	-2.8091	-2.8091	-2.8091	-2.8091	-2.8091	-2.8091	-2.8091	-2.8091	-2.8091	-2.8091	-2.8091	-2.8091
rno-piR-11445	-2.8091	-1.21021	0.306354	-2.8091	-0.691621	0.338593	-2.8091	-2.8091	-2.8091	-2.8091	-2.8091	-2.8091	-2.8091	-2.8091	-2.8091	-2.8091	-2.8091	-0.401497	-2.8091	-2.8091	-2.8091	-2.8091	-2.8091	-2.8091
rno-piR-11446	-2.8091	-2.8091	-2.8091	-0.817012	-2.8091	-2.8091	-2.8091	-2.8091	-2.8091	-2.8091	-2.8091	-2.8091	-2.8091	-0.857667	-2.8091	-2.8091	-2.8091	-2.8091	-2.8091	-2.8091	-2.8091	-2.8091	-2.8091	-2.8091
rno-piR-11448	-0.497571	-2.8091	-1.9595	-2.8091	-2.8091	0.338593	-2.8091	-2.8091	-2.8091	-2.8091	-2.8091	-2.8091	-2.8091	-2.8091	-2.8091	-2.8091	-2.8091	-2.8091	-2.8091	-2.8091	-2.8091	0.563112	-2.8091	-2.8091
rno-piR-11449	0.228153	-1.21021	0.112934	0.290504	-0.00243066	0.821078	-2.8091	2.05668	-2.8091	0.469226	-2.8091	-2.8091	-2.8091	1.43551	-2.8091	4.37445	-2.8091	-2.8091	0.0317522	-2.8091	-2.8091	-2.8091	-2.8091	-2.8091
rno-piR-1145	1.57947	0.0587823	0.579244	1.65165	1.30869	1.91202	-2.8091	2.05668	-2.8091	-0.291042	-2.8091	-2.8091	-2.8091	-0.857667	-2.8091	-2.8091	-0.269622	-0.401497	1.34924	5.44823	-2.8091	-2.8091	-2.8091	-2.8091
rno-piR-11450	1.05817	-2.8091	-0.0327353	-2.8091	-2.8091	0.338593	-2.8091	-2.8091	-2.8091	-2.8091	-2.8091	-2.8091	-2.8091	0.570591	-2.8091	-2.8091	-0.912094	-0.401497	0.0317522	-2.8091	-2.8091	-2.8091	5.68245	5.93877
rno-piR-11451	-2.8091	-1.21021	-1.62376	0.290504	-0.691621	-2.8091	-2.8091	-2.8091	-2.8091	-2.8091	5.27413	-2.8091	-2.8091	-0.857667	-2.8091	-2.8091	-2.8091	-2.8091	2.02303	-2.8091	-2.8091	-2.8091	-2.8091	-2.8091
rno-piR-11452	-2.8091	-2.8091	-2.8091	-2.8091	-2.8091	-2.8091	-2.8091	-2.8091	-2.8091	-2.8091	-2.8091	-2.8091	-2.8091	-2.8091	-2.8091	-2.8091	-2.8091	-2.8091	-2.8091	-2.8091	-2.8091	0.563112	-2.8091	-2.8091
rno-piR-11453	-2.8091	-2.8091	-2.8091	-2.8091	-2.8091	-2.8091	-2.8091	-2.8091	-2.8091	-2.8091	-2.8091	-2.8091	-2.8091	-0.857667	-2.8091	0.370133	-2.8091	-2.8091	-2.8091	-2.8091	-2.8091	-2.8091	-2.8091	-2.8091
rno-piR-11454	1.05817	0.868485	1.24178	2.73218	2.6203	0.821078	-2.8091	0.646749	-2.8091	0.960112	-2.8091	-2.8091	-2.8091	0.236575	-2.8091	-2.8091	2.35485	1.91462	2.02303	3.2656	-2.8091	-2.8091	-2.8091	-2.8091
rno-piR-11455	-2.8091	-2.8091	-2.8091	-2.8091	-2.8091	-2.8091	-2.8091	-2.8091	-2.8091	-2.8091	-2.8091	-2.8091	-2.8091	-2.8091	-2.8091	-2.8091	-2.8091	-2.8091	-2.8091	-2.8091	-2.8091	-2.8091	2.82617	-2.8091
rno-piR-11456	-2.8091	-2.8091	-2.8091	-2.8091	-0.691621	-2.8091	-2.8091	-2.8091	-2.8091	-2.8091	-2.8091	-2.8091	-2.8091	-2.8091	-2.8091	-2.8091	-0.912094	-2.8091	-2.8091	-2.8091	-2.8091	-2.8091	-2.8091	1.83995
rno-piR-11457	-2.8091	-2.8091	-1.9595	-2.8091	-2.8091	-2.8091	-2.8091	-2.8091	-2.8091	-2.8091	-2.8091	-2.8091	-2.8091	-2.8091	-2.8091	-2.8091	-2.8091	-2.8091	0.0317522	-2.8091	-2.8091	-2.8091	-2.8091	-2.8091
rno-piR-11459	-0.497571	-2.8091	-1.37586	-0.817012	-0.691621	-2.8091	1.08683	-2.8091	-2.8091	0.960112	-2.8091	-2.8091	-2.8091	-0.857667	-2.8091	-2.8091	-0.912094	-2.8091	-2.8091	-2.8091	-2.8091	-2.8091	-2.8091	-2.8091
rno-piR-1146	-2.8091	-2.8091	-1.62376	-2.8091	-2.8091	-2.8091	-2.8091	-2.8091	-2.8091	-2.8091	1.01527	-2.8091	-2.8091	-2.8091	-2.8091	-2.8091	-2.8091	-2.8091	-2.8091	-2.8091	-2.8091	-2.8091	-2.8091	-2.8091
rno-piR-11462	-2.8091	-2.8091	-2.8091	-2.8091	-2.8091	-0.403412	-2.8091	-2.8091	-2.8091	-2.8091	-2.8091	-2.8091	-2.8091	-2.8091	-2.8091	-2.8091	-2.8091	-2.8091	-2.8091	-2.8091	-2.8091	-2.8091	-2.8091	-2.8091
rno-piR-11463	-2.8091	-2.8091	-1.9595	-2.8091	-2.8091	-2.8091	-2.8091	-2.8091	-2.8091	-0.291042	-2.8091	-2.8091	-2.8091	-0.857667	-2.8091	-2.8091	-2.8091	-2.8091	-2.8091	-2.8091	-2.8091	-2.8091	-2.8091	-2.8091
rno-piR-11464	0.702996	-2.8091	0.306354	0.627278	0.454729	-0.403412	-2.8091	-2.8091	-2.8091	-2.8091	-2.8091	-2.8091	-2.8091	-0.857667	-2.8091	-2.8091	0.7614	-2.8091	0.0317522	-2.8091	-2.8091	-2.8091	-2.8091	-2.8091
rno-piR-11466	0.228153	-0.640445	-0.594968	-0.817012	-0.00243066	-0.403412	-2.8091	-2.8091	-2.8091	-2.8091	-2.8091	-2.8091	-2.8091	0.236575	-2.8091	0.370133	0.163835	-0.401497	0.0317522	-2.8091	-2.8091	3.88307	-2.8091	-2.8091
rno-piR-11467	-2.8091	-2.8091	-1.62376	-2.8091	-2.8091	-2.8091	-2.8091	-2.8091	-2.8091	-2.8091	-2.8091	-2.8091	-2.8091	-2.8091	-2.8091	-2.8091	-2.8091	-0.401497	-2.8091	-2.8091	-2.8091	-2.8091	-2.8091	-2.8091
rno-piR-11468	-2.8091	-2.8091	-2.8091	-2.8091	-2.8091	-2.8091	-2.8091	-2.8091	-2.8091	-2.8091	3.42752	-2.8091	-2.8091	-2.8091	-2.8091	-2.8091	-2.8091	-2.8091	0.0317522	-2.8091	-2.8091	-2.8091	-2.8091	-2.8091
rno-piR-1147	0.702996	-1.21021	-0.483425	-0.817012	-0.00243066	0.338593	2.94032	0.646749	-2.8091	1.61494	-2.8091	-2.8091	-2.8091	0.236575	-2.8091	1.74324	-0.912094	0.340829	0.838007	3.96878	-2.8091	4.29117	-2.8091	-2.8091
rno-piR-11470	-2.8091	-2.8091	-2.8091	-0.817012	-0.691621	-2.8091	1.08683	-2.8091	-2.8091	-0.291042	-2.8091	-2.8091	-2.8091	-2.8091	-2.8091	-2.8091	-2.8091	-2.8091	-2.8091	-2.8091	-2.8091	-2.8091	-2.8091	-2.8091
rno-piR-11471	0.228153	-2.8091	-0.284903	-0.817012	-0.691621	-2.8091	-2.8091	-2.8091	-2.8091	-0.291042	-2.8091	-2.8091	-2.8091	0.236575	-2.8091	-2.8091	0.163835	-0.401497	2.26962	-2.8091	-2.8091	-2.8091	-2.8091	-2.8091
rno-piR-11472	-2.8091	-2.8091	-1.9595	-2.8091	-2.8091	-0.403412	-2.8091	-2.8091	-2.8091	-2.8091	-2.8091	-2.8091	-2.8091	-2.8091	-2.8091	-2.8091	-2.8091	-2.8091	-2.8091	-2.8091	-2.8091	-2.8091	-2.8091	-2.8091
rno-piR-11476	-0.497571	-0.246323	0.421916	1.12746	1.50838	0.338593	2.54268	-2.8091	-2.8091	-2.8091	-2.8091	-2.8091	-2.8091	-0.203124	-2.8091	-2.8091	-0.269622	-2.8091	-2.8091	3.42161	-2.8091	0.563112	-2.8091	-2.8091
rno-piR-11477	-0.497571	-1.21021	-1.9595	-2.8091	-2.8091	-2.8091	-2.8091	-2.8091	-2.8091	-2.8091	-2.8091	-2.8091	-2.8091	-2.8091	-2.8091	-2.8091	-0.912094	-2.8091	-2.8091	-2.8091	-2.8091	-2.8091	-2.8091	-2.8091
rno-piR-11478	-2.8091	-2.8091	-1.37586	-2.8091	-2.8091	-2.8091	-2.8091	-2.8091	-2.8091	-2.8091	-2.8091	-2.8091	-2.8091	-2.8091	-2.8091	-2.8091	-2.8091	-2.8091	-2.8091	-2.8091	-2.8091	-2.8091	-2.8091	-2.8091
rno-piR-11479	-2.8091	0.308753	0.476328	-0.153685	-0.00243066	1.18072	-2.8091	-2.8091	-2.8091	0.960112	4.28467	-2.8091	-2.8091	0.840636	-2.8091	-2.8091	0.7614	0.340829	-2.8091	2.04396	-2.8091	-2.8091	-2.8091	-2.8091
rno-piR-11480	-2.8091	-2.8091	-1.9595	-2.8091	-2.8091	-2.8091	-2.8091	-2.8091	-2.8091	-2.8091	-2.8091	-2.8091	-2.8091	-2.8091	-2.8091	-2.8091	-2.8091	-2.8091	-2.8091	-2.8091	-2.8091	-2.8091	-2.8091	-2.8091
rno-piR-11482	-0.497571	-2.8091	-1.9595	-2.8091	-2.8091	-2.8091	-2.8091	-2.8091	-2.8091	-2.8091	-2.8091	-2.8091	-2.8091	-2.8091	-2.8091	-2.8091	-2.8091	-2.8091	-2.8091	-2.8091	-2.8091	-2.8091	-2.8091	-2.8091
rno-piR-11483	-2.8091	-0.246323	-0.0327353	-2.8091	-0.00243066	-2.8091	-2.8091	-2.8091	-2.8091	-2.8091	-2.8091	-2.8091	-2.8091	-2.8091	-2.8091	-2.8091	0.493989	-0.401497	-2.8091	-2.8091	-2.8091	-2.8091	-2.8091	-2.8091
rno-piR-11484	-2.8091	-2.8091	-2.8091	-2.8091	-2.8091	-2.8091	-2.8091	-2.8091	-2.8091	-2.8091	-2.8091	-2.8091	-2.8091	-2.8091	-2.8091	-2.8091	-2.8091	-0.401497	-2.8091	-2.8091	-2.8091	-2.8091	-2.8091	-2.8091
rno-piR-11486	-2.8091	-2.8091	-2.8091	-2.8091	-2.8091	-2.8091	-2.8091	-2.8091	-2.8091	-2.8091	-2.8091	-2.8091	-2.8091	-2.8091	-2.8091	-2.8091	-2.8091	-2.8091	-2.8091	-2.8091	-2.8091	-2.8091	1.88149	-2.8091
rno-piR-11487	-2.8091	-2.8091	-1.37586	-2.8091	-2.8091	-2.8091	-2.8091	-2.8091	-2.8091	-2.8091	-2.8091	-2.8091	-2.8091	-0.857667	-2.8091	-2.8091	-2.8091	-2.8091	-2.8091	-2.8091	-2.8091	-2.8091	-2.8091	-2.8091
rno-piR-11488	-2.8091	-2.8091	-2.8091	-2.8091	-2.8091	-2.8091	-2.8091	-2.8091	-2.8091	-0.291042	-2.8091	-2.8091	-2.8091	-2.8091	-2.8091	-2.8091	-2.8091	-2.8091	-2.8091	-2.8091	-2.8091	-2.8091	-2.8091	-2.8091
rno-piR-11489	-2.8091	-2.8091	-1.62376	-0.817012	-0.691621	-2.8091	-2.8091	-2.8091	-2.8091	-2.8091	-2.8091	-2.8091	-2.8091	-0.203124	-2.8091	-2.8091	-2.8091	-2.8091	-2.8091	-2.8091	-2.8091	-2.8091	-2.8091	-2.8091
rno-piR-1149	-2.8091	-2.8091	-2.8091	-0.817012	-2.8091	-2.8091	-2.8091	-2.8091	-2.8091	-0.291042	-2.8091	-2.8091	-2.8091	-2.8091	-2.8091	-2.8091	-2.8091	-2.8091	0.0317522	-2.8091	-2.8091	-2.8091	-2.8091	-2.8091
rno-piR-11493	-2.8091	-1.21021	-0.483425	-2.8091	-0.691621	-2.8091	-2.8091	2.44751	-2.8091	-0.291042	1.01527	-2.8091	-2.8091	-0.203124	-2.8091	-2.8091	-2.8091	0.823464	0.838007	-2.8091	-2.8091	-2.8091	-2.8091	-2.8091
rno-piR-11494	0.228153	-2.8091	-1.00219	-2.8091	-0.691621	-0.403412	-2.8091	-2.8091	-2.8091	-2.8091	-2.8091	-2.8091	-2.8091	-0.857667	-2.8091	-2.8091	-0.912094	-2.8091	0.0317522	-2.8091	-2.8091	-2.8091	-2.8091	-2.8091
rno-piR-11497	-2.8091	-2.8091	-1.9595	-2.8091	-2.8091	-2.8091	-2.8091	-2.8091	-2.8091	-2.8091	-2.8091	-2.8091	-2.8091	-2.8091	-2.8091	-2.8091	-2.8091	-2.8091	0.838007	-2.8091	-2.8091	-2.8091	-2.8091	-2.8091
rno-piR-11499	-2.8091	-1.21021	-1.37586	-2.8091	-2.8091	-2.8091	-2.8091	-2.8091	-2.8091	-2.8091	-2.8091	-2.8091	-2.8091	-2.8091	-2.8091	-2.8091	-2.8091	-0.401497	-2.8091	-2.8091	-2.8091	-2.8091	-2.8091	-2.8091
rno-piR-115	-2.8091	-2.8091	-1.9595	-2.8091	-2.8091	-2.8091	-2.8091	-2.8091	-2.8091	-2.8091	-2.8091	-2.8091	-2.8091	-2.8091	-2.8091	-2.8091	-2.8091	-2.8091	-2.8091	-2.8091	-2.8091	-2.8091	-2.8091	-2.8091
rno-piR-1150	2.51144	-1.21021	-2.8091	-0.153685	-0.691621	-2.8091	-2.8091	-2.8091	-2.8091	-2.8091	-2.8091	-2.8091	-2.8091	-2.8091	-2.8091	-2.8091	-2.8091	0.340829	-2.8091	-2.8091	-2.8091	-2.8091	-2.8091	-2.8091
rno-piR-11502	-2.8091	-2.8091	-2.8091	-0.817012	-2.8091	-2.8091	-2.8091	-2.8091	-2.8091	-2.8091	-2.8091	-2.8091	-2.8091	-0.857667	-2.8091	-2.8091	-2.8091	-2.8091	-2.8091	-2.8091	-2.8091	-2.8091	-2.8091	-2.8091
rno-piR-11504	-2.8091	-2.8091	-2.8091	-0.817012	-2.8091	-2.8091	-2.8091	-2.8091	-2.8091	-2.8091	-2.8091	-2.8091	-2.8091	-2.8091	-2.8091	-2.8091	-2.8091	-2.8091	-2.8091	-2.8091	-2.8091	-2.8091	-2.8091	-2.8091
rno-piR-11505	-2.8091	-2.8091	-1.62376	-2.8091	-2.8091	-2.8091	-2.8091	-2.8091	-2.8091	-2.8091	-2.8091	-2.8091	-2.8091	-2.8091	-2.8091	-2.8091	-2.8091	-2.8091	-2.8091	-2.8091	-2.8091	-2.8091	-2.8091	-2.8091
rno-piR-11507	-2.8091	-2.8091	-1.9595	-2.8091	-2.8091	-2.8091	-2.8091	-2.8091	-2.8091	1.32461	-2.8091	-2.8091	-2.8091	-0.857667	-2.8091	-2.8091	-2.8091	-2.8091	0.0317522	-2.8091	-2.8091	-2.8091	-2.8091	-2.8091
rno-piR-11508	-2.8091	-2.8091	-2.8091	-2.8091	-2.8091	-2.8091	-2.8091	-2.8091	-2.8091	-2.8091	-2.8091	-2.8091	-2.8091	-0.857667	-2.8091	-2.8091	-2.8091	-2.8091	0.0317522	-2.8091	-2.8091	-2.8091	-2.8091	-2.8091
rno-piR-11509	-2.8091	-2.8091	-1.9595	-2.8091	-2.8091	-2.8091	-2.8091	0.646749	-2.8091	-2.8091	-2.8091	-2.8091	-2.8091	-0.857667	-2.8091	-2.8091	-2.8091	-0.401497	-2.8091	-2.8091	-2.8091	-2.8091	-2.8091	-2.8091
rno-piR-1151	-2.8091	-2.8091	-1.9595	-2.8091	-2.8091	-2.8091	-2.8091	-2.8091	-2.8091	0.960112	-2.8091	-2.8091	-2.8091	-2.8091	-2.8091	-2.8091	-2.8091	-2.8091	-2.8091	-2.8091	-2.8091	-2.8091	-2.8091	-2.8091
rno-piR-11510	-2.8091	-2.8091	-2.8091	-2.8091	-2.8091	-2.8091	-2.8091	-2.8091	-2.8091	-2.8091	-2.8091	-2.8091	-2.8091	-2.8091	-2.8091	-2.8091	-2.8091	-2.8091	-2.8091	2.66031	-2.8091	-2.8091	-2.8091	-2.8091
rno-piR-11513	-2.8091	-2.8091	-1.9595	-2.8091	-2.8091	-2.8091	-2.8091	0.646749	-2.8091	-2.8091	-2.8091	-2.8091	-2.8091	-2.8091	-2.8091	-2.8091	-2.8091	-2.8091	-2.8091	-2.8091	-2.8091	-2.8091	-2.8091	-2.8091
rno-piR-11517	-0.497571	-1.21021	-0.594968	0.290504	-0.00243066	-2.8091	2.94032	-2.8091	-2.8091	-2.8091	-2.8091	-2.8091	-2.8091	-0.857667	-2.8091	-2.8091	-0.912094	0.340829	0.838007	-2.8091	-2.8091	-2.8091	-2.8091	0.944813
rno-piR-11518	0.228153	-2.8091	-2.8091	-2.8091	-2.8091	-2.8091	-2.8091	-2.8091	-2.8091	-2.8091	-2.8091	-2.8091	-2.8091	-2.8091	-2.8091	-2.8091	-2.8091	-2.8091	-2.8091	-2.8091	-2.8091	-2.8091	-2.8091	-2.8091
rno-piR-11520	-0.497571	-2.8091	-1.37586	-2.8091	-2.8091	-2.8091	-2.8091	-2.8091	-2.8091	-2.8091	-2.8091	-2.8091	-2.8091	-2.8091	-2.8091	-2.8091	-0.912094	-2.8091	-2.8091	-2.8091	-2.8091	-2.8091	-2.8091	-2.8091
rno-piR-11521	-2.8091	-1.21021	1.04127	0.290504	1.68365	1.18072	-2.8091	0.646749	-2.8091	0.960112	2.86126	-2.8091	-2.8091	0.840636	-2.8091	-2.8091	1.35176	1.70961	0.838007	2.78052	-2.8091	-2.8091	-2.8091	-2.8091
rno-piR-11522	1.57947	-2.8091	-1.37586	-2.8091	-2.8091	-2.8091	-2.8091	-2.8091	-2.8091	-2.8091	-2.8091	-2.8091	-2.8091	-2.8091	-2.8091	-2.8091	-2.8091	-2.8091	-2.8091	-2.8091	-2.8091	-2.8091	-2.8091	-2.8091
rno-piR-11523	-2.8091	-2.8091	-1.17414	-0.817012	-2.8091	-2.8091	-2.8091	-2.8091	-2.8091	-2.8091	-2.8091	-2.8091	-2.8091	-2.8091	-2.8091	-2.8091	-2.8091	-0.401497	-2.8091	-2.8091	-2.8091	-2.8091	-2.8091	-2.8091
rno-piR-11524	1.57947	-1.21021	-2.8091	-2.8091	-2.8091	1.18072	2.54268	2.44751	-2.8091	2.24363	-2.8091	-2.8091	-2.8091	-2.8091	-2.8091	2.12834	-2.8091	-2.8091	2.6637	-2.8091	-2.8091	-2.8091	-2.8091	2.38734
rno-piR-11525	-2.8091	-2.8091	-2.8091	-2.8091	-2.8091	-2.8091	-2.8091	-2.8091	-2.8091	-2.8091	-2.8091	-2.8091	-2.8091	-2.8091	-2.8091	-2.8091	-0.912094	-2.8091	-2.8091	-2.8091	-2.8091	-2.8091	-2.8091	-2.8091
rno-piR-11527	-2.8091	-2.8091	-1.62376	-2.8091	-2.8091	-2.8091	-2.8091	-2.8091	-2.8091	-2.8091	-2.8091	-2.8091	-2.8091	-2.8091	-2.8091	-2.8091	-0.912094	-2.8091	-2.8091	-2.8091	-2.8091	-2.8091	-2.8091	-2.8091
rno-piR-11528	0.228153	-2.8091	-1.62376	-2.8091	-0.691621	-0.403412	-2.8091	-2.8091	-2.8091	-2.8091	-2.8091	-2.8091	-2.8091	-2.8091	-2.8091	-2.8091	-2.8091	-2.8091	-2.8091	-2.8091	-2.8091	-2.8091	-2.8091	-2.8091
rno-piR-1153	-2.8091	-2.8091	-1.9595	-2.8091	-2.8091	-2.8091	-2.8091	-2.8091	-2.8091	-2.8091	-2.8091	-2.8091	-2.8091	-2.8091	-2.8091	-2.8091	-2.8091	-2.8091	-2.8091	-2.8091	-2.8091	-2.8091	-2.8091	-2.8091
rno-piR-11530	-2.8091	-2.8091	-1.9595	-2.8091	-2.8091	-2.8091	-2.8091	-2.8091	-2.8091	-2.8091	-2.8091	-2.8091	-2.8091	-2.8091	-2.8091	-2.8091	-2.8091	-2.8091	-2.8091	-2.8091	-2.8091	-2.8091	-2.8091	-2.8091
rno-piR-11531	-2.8091	-0.640445	0.0420094	-2.8091	-0.00243066	-2.8091	1.99161	-2.8091	-2.8091	-2.8091	-2.8091	-2.8091	-2.8091	-0.857667	-2.8091	-2.8091	-0.912094	-0.401497	0.838007	-2.8091	-2.8091	-2.8091	-2.8091	-2.8091
rno-piR-11532	-2.8091	-2.8091	-1.9595	-2.8091	-2.8091	-2.8091	-2.8091	-2.8091	-2.8091	-2.8091	-2.8091	2.03091	-2.8091	-2.8091	-2.8091	-2.8091	-2.8091	-2.8091	-2.8091	-2.8091	-2.8091	-2.8091	-2.8091	-2.8091
rno-piR-11534	-2.8091	-2.8091	-2.8091	-2.8091	-0.691621	-2.8091	-2.8091	-2.8091	-2.8091	-2.8091	-2.8091	-2.8091	-2.8091	-2.8091	-2.8091	-2.8091	-2.8091	-2.8091	-2.8091	-2.8091	-2.8091	-2.8091	-2.8091	-2.8091
rno-piR-11535	-2.8091	-2.8091	-1.17414	-2.8091	-2.8091	-2.8091	-2.8091	-2.8091	-2.8091	-2.8091	-2.8091	-2.8091	-2.8091	-2.8091	-2.8091	-2.8091	-2.8091	-0.401497	-2.8091	-2.8091	-2.8091	-2.8091	-2.8091	-2.8091
rno-piR-11536	-2.8091	-2.8091	-1.9595	-2.8091	-0.691621	-2.8091	-2.8091	-2.8091	-2.8091	-2.8091	-2.8091	-2.8091	-2.8091	-2.8091	-2.8091	-2.8091	-2.8091	-2.8091	-2.8091	-2.8091	-2.8091	-2.8091	-2.8091	-2.8091
rno-piR-11539	-2.8091	-2.8091	-1.9595	-2.8091	-2.8091	-2.8091	-2.8091	-2.8091	-2.8091	-2.8091	-2.8091	-2.8091	-2.8091	-2.8091	-2.8091	-2.8091	-2.8091	-2.8091	-2.8091	-2.8091	-2.8091	-2.8091	-2.8091	-2.8091
rno-piR-1154	-2.8091	-2.8091	-1.9595	-2.8091	-2.8091	-2.8091	-2.8091	-2.8091	-2.8091	-2.8091	-2.8091	-2.8091	-2.8091	-2.8091	-2.8091	-2.8091	-2.8091	-2.8091	-2.8091	-2.8091	-2.8091	-2.8091	-2.8091	-2.8091
rno-piR-11540	1.57947	0.520875	0.675187	-0.817012	1.50838	1.70704	-2.8091	0.646749	-2.8091	-2.8091	4.62809	-2.8091	-2.8091	0.840636	-2.8091	-2.8091	-2.8091	-2.8091	2.02303	-2.8091	-2.8091	-2.8091	3.79729	-2.8091
rno-piR-11541	-2.8091	-1.21021	-1.9595	-0.817012	-0.691621	-2.8091	-2.8091	-2.8091	-2.8091	-2.8091	-2.8091	-2.8091	-2.8091	-0.857667	-2.8091	-2.8091	-2.8091	-0.401497	0.0317522	-2.8091	-2.8091	1.96264	-2.8091	-2.8091
rno-piR-11544	-2.8091	-2.8091	-1.9595	-2.8091	-0.691621	-2.8091	-2.8091	-2.8091	-2.8091	-2.8091	-2.8091	-2.8091	-2.8091	-2.8091	-2.8091	-2.8091	-2.8091	-2.8091	-2.8091	-2.8091	-2.8091	-2.8091	-2.8091	-2.8091
rno-piR-11546	-2.8091	-2.8091	-1.9595	-2.8091	-2.8091	-2.8091	-2.8091	-2.8091	-2.8091	-2.8091	-2.8091	-2.8091	-2.8091	-2.8091	-2.8091	-2.8091	-2.8091	-2.8091	-2.8091	-2.8091	-2.8091	-2.8091	-2.8091	-2.8091
rno-piR-11547	-2.8091	-2.8091	-1.9595	-2.8091	-2.8091	-2.8091	-2.8091	-2.8091	-2.8091	-2.8091	-2.8091	-2.8091	-2.8091	-2.8091	-2.8091	-2.8091	-2.8091	-2.8091	-2.8091	-2.8091	-2.8091	-2.8091	-2.8091	-2.8091
rno-piR-11548	-2.8091	-2.8091	-0.284903	-0.817012	-0.691621	0.821078	-2.8091	-2.8091	-2.8091	-2.8091	-2.8091	-2.8091	-2.8091	-2.8091	-2.8091	-2.8091	0.163835	-0.401497	2.6637	-2.8091	-2.8091	-2.8091	-2.8091	-2.8091
rno-piR-11549	-0.497571	-2.8091	-1.9595	-2.8091	-0.691621	-0.403412	-2.8091	-2.8091	-2.8091	-2.8091	-2.8091	2.98098	-2.8091	-2.8091	-2.8091	-2.8091	0.7614	-0.401497	0.0317522	-2.8091	-2.8091	-2.8091	-2.8091	-2.8091
rno-piR-11550	-2.8091	-2.8091	-2.8091	-2.8091	-2.8091	-2.8091	3.91363	-2.8091	-2.8091	-2.8091	-2.8091	-2.8091	-2.8091	-2.8091	-2.8091	-2.8091	-2.8091	-0.401497	-2.8091	-2.8091	-2.8091	-2.8091	-2.8091	-2.8091
rno-piR-11551	-2.8091	-2.8091	-1.9595	-2.8091	-2.8091	-2.8091	-2.8091	-2.8091	-2.8091	-2.8091	-2.8091	-2.8091	-2.8091	-2.8091	-2.8091	-2.8091	-0.912094	-2.8091	-2.8091	-2.8091	-2.8091	-2.8091	-2.8091	-2.8091
rno-piR-11552	-0.497571	-1.21021	0.180423	0.290504	0.454729	-2.8091	-2.8091	3.85897	-2.8091	-2.8091	-2.8091	-2.8091	-2.8091	-2.8091	-2.8091	-2.8091	-2.8091	0.340829	0.0317522	4.70542	-2.8091	-2.8091	-2.8091	-2.8091
rno-piR-11556	-2.8091	-2.8091	-0.483425	-2.8091	-0.691621	-2.8091	-2.8091	-2.8091	-2.8091	-2.8091	-2.8091	-2.8091	-2.8091	-2.8091	-2.8091	-2.8091	-0.912094	-0.401497	-2.8091	-2.8091	-2.8091	-2.8091	-2.8091	-2.8091
rno-piR-11558	-2.8091	-1.21021	-0.716865	-2.8091	-0.691621	-2.8091	-2.8091	-2.8091	-2.8091	0.960112	-2.8091	-2.8091	-2.8091	-0.857667	-2.8091	-2.8091	-0.269622	-2.8091	-2.8091	-2.8091	-2.8091	-2.8091	-2.8091	-2.8091
rno-piR-11559	-2.8091	-1.21021	-2.8091	-2.8091	-2.8091	-2.8091	-2.8091	-2.8091	-2.8091	-2.8091	-2.8091	-2.8091	-2.8091	-2.8091	-2.8091	-2.8091	-2.8091	-2.8091	-2.8091	-2.8091	-2.8091	-2.8091	-2.8091	-2.8091
rno-piR-1156	-2.8091	-2.8091	-1.62376	-2.8091	-2.8091	-2.8091	-2.8091	-2.8091	-2.8091	-2.8091	-2.8091	-2.8091	-2.8091	-2.8091	-2.8091	-2.8091	-2.8091	-0.401497	-2.8091	-2.8091	-2.8091	-2.8091	-2.8091	-2.8091
rno-piR-11563	-2.8091	-2.8091	-0.851482	-2.8091	-0.00243066	-0.403412	-2.8091	-2.8091	-2.8091	-2.8091	-2.8091	-2.8091	-2.8091	-2.8091	-2.8091	-2.8091	-2.8091	-2.8091	-2.8091	-2.8091	-2.8091	-2.8091	-2.8091	-2.8091
rno-piR-11564	-2.8091	-1.21021	-1.9595	-2.8091	0.454729	-2.8091	-2.8091	-2.8091	-2.8091	-2.8091	-2.8091	-2.8091	-2.8091	-0.203124	-2.8091	-2.8091	-0.269622	-0.401497	-2.8091	-2.8091	-2.8091	-2.8091	-2.8091	-2.8091
rno-piR-11565	-2.8091	-1.21021	-2.8091	-2.8091	-0.691621	-2.8091	-2.8091	-2.8091	-2.8091	-0.291042	-2.8091	-2.8091	-2.8091	-2.8091	-2.8091	-2.8091	-2.8091	-2.8091	-2.8091	2.78052	-2.8091	2.35186	-2.8091	-2.8091
rno-piR-11566	-2.8091	-1.21021	-1.37586	0.627278	-0.00243066	-2.8091	-2.8091	-2.8091	-2.8091	-2.8091	-2.8091	-2.8091	-2.8091	0.236575	-2.8091	-2.8091	-2.8091	-0.401497	-2.8091	-2.8091	-2.8091	-2.8091	-2.8091	-2.8091
rno-piR-11568	-2.8091	-2.8091	-2.8091	-2.8091	-2.8091	-2.8091	-2.8091	-2.8091	-2.8091	-2.8091	-2.8091	-2.8091	-2.8091	-0.857667	-2.8091	-2.8091	-2.8091	-2.8091	-2.8091	-2.8091	-2.8091	-2.8091	-2.8091	-2.8091
rno-piR-11569	-2.8091	-2.8091	-2.8091	-2.8091	-0.691621	-2.8091	-2.8091	-2.8091	-2.8091	-2.8091	-2.8091	-2.8091	-2.8091	-2.8091	-2.8091	-2.8091	-2.8091	-2.8091	0.0317522	-2.8091	-2.8091	-2.8091	-2.8091	-2.8091
rno-piR-1157	-2.8091	-2.8091	-2.8091	-2.8091	-2.8091	-2.8091	-2.8091	-2.8091	-2.8091	-2.8091	-2.8091	2.03091	-2.8091	-2.8091	-2.8091	-2.8091	-2.8091	-2.8091	0.0317522	-2.8091	-2.8091	-2.8091	-2.8091	-2.8091
rno-piR-11571	-2.8091	-2.8091	-1.9595	-2.8091	-2.8091	-2.8091	-2.8091	-2.8091	-2.8091	-2.8091	-2.8091	-2.8091	-2.8091	-2.8091	-2.8091	-2.8091	-2.8091	-2.8091	-2.8091	-2.8091	-2.8091	-2.8091	-2.8091	-2.8091
rno-piR-11574	-2.8091	-2.8091	-2.8091	-2.8091	-2.8091	-2.8091	-2.8091	-2.8091	-2.8091	-2.8091	-2.8091	-2.8091	-2.8091	-2.8091	-2.8091	-2.8091	-2.8091	-0.401497	-2.8091	-2.8091	-2.8091	-2.8091	-2.8091	-2.8091
rno-piR-11575	-2.8091	-2.8091	-2.8091	-0.817012	-2.8091	-2.8091	-2.8091	-2.8091	2.2881	-2.8091	-2.8091	-2.8091	-2.8091	-2.8091	-2.8091	-2.8091	-2.8091	-2.8091	-2.8091	-2.8091	-2.8091	-2.8091	-2.8091	-2.8091
rno-piR-11576	-2.8091	-2.8091	-1.9595	-2.8091	-2.8091	-2.8091	-2.8091	-2.8091	-2.8091	-2.8091	4.28467	-2.8091	-2.8091	-2.8091	-2.8091	-2.8091	-2.8091	-2.8091	-2.8091	-2.8091	-2.8091	-2.8091	-2.8091	-2.8091
rno-piR-11579	0.702996	-2.8091	-0.111754	-2.8091	-0.691621	-2.8091	-2.8091	-2.8091	-2.8091	-2.8091	-2.8091	-2.8091	-2.8091	-0.203124	-2.8091	-2.8091	-0.912094	-2.8091	-2.8091	-2.8091	-2.8091	-2.8091	-2.8091	-2.8091
rno-piR-11580	-2.8091	-0.640445	-1.37586	-0.153685	-2.8091	-2.8091	-2.8091	-2.8091	-2.8091	-2.8091	-2.8091	-2.8091	-2.8091	-2.8091	-2.8091	-2.8091	-0.912094	0.823464	-2.8091	-2.8091	-2.8091	-2.8091	-2.8091	-2.8091
rno-piR-11581	-2.8091	-2.8091	-1.00219	-0.817012	-0.691621	-2.8091	-2.8091	-2.8091	-2.8091	-2.8091	-2.8091	-2.8091	-2.8091	-2.8091	4.99476	-2.8091	-2.8091	-2.8091	0.0317522	2.66031	-2.8091	-2.8091	-2.8091	-2.8091
rno-piR-11582	-2.8091	-1.21021	-1.37586	-2.8091	-0.691621	-2.8091	-2.8091	-2.8091	-2.8091	-2.8091	-2.8091	-2.8091	-2.8091	-2.8091	-2.8091	-2.8091	0.163835	-2.8091	-2.8091	-2.8091	-2.8091	-2.8091	-2.8091	-2.8091
rno-piR-11583	-2.8091	-1.21021	0.180423	-0.153685	-2.8091	-2.8091	-2.8091	-2.8091	-2.8091	-2.8091	5.67011	-2.8091	-2.8091	-0.857667	-2.8091	-2.8091	-2.8091	-2.8091	-2.8091	-2.8091	-2.8091	-2.8091	-2.8091	-2.8091
rno-piR-11584	-2.8091	-2.8091	-1.37586	-2.8091	-2.8091	-2.8091	-2.8091	-2.8091	-2.8091	-2.8091	-2.8091	-2.8091	-2.8091	-2.8091	-2.8091	-2.8091	-2.8091	-2.8091	-2.8091	-2.8091	-2.8091	-2.8091	-2.8091	-2.8091
rno-piR-11585	-2.8091	-2.8091	-2.8091	-2.8091	-0.00243066	-2.8091	-2.8091	-2.8091	-2.8091	0.960112	-2.8091	-2.8091	-2.8091	-2.8091	-2.8091	-2.8091	-2.8091	-2.8091	-2.8091	-2.8091	-2.8091	-2.8091	-2.8091	-2.8091
rno-piR-11586	-2.8091	-2.8091	-0.380507	-0.817012	1.07661	-0.403412	-2.8091	-2.8091	-2.8091	-0.291042	-2.8091	-2.8091	-2.8091	-2.8091	-2.8091	-2.8091	-2.8091	-2.8091	1.34924	-2.8091	-2.8091	-2.8091	5.86208	-2.8091
rno-piR-11587	-0.497571	-2.8091	-1.62376	0.290504	-2.8091	-2.8091	-2.8091	0.646749	-2.8091	-0.291042	-2.8091	-2.8091	-2.8091	-0.857667	-2.8091	-2.8091	-2.8091	-2.8091	0.0317522	-2.8091	-2.8091	-2.8091	-2.8091	-2.8091
rno-piR-11588	-2.8091	-2.8091	-0.483425	-2.8091	-2.8091	-2.8091	-2.8091	-2.8091	-2.8091	-2.8091	-2.8091	-2.8091	-2.8091	-2.8091	-2.8091	-2.8091	-2.8091	-2.8091	-2.8091	1.30646	-2.8091	-2.8091	-2.8091	-2.8091
rno-piR-11591	-2.8091	-2.8091	-1.9595	-2.8091	-2.8091	-2.8091	-2.8091	-2.8091	-2.8091	-2.8091	-2.8091	-2.8091	-2.8091	-2.8091	-2.8091	-2.8091	-2.8091	-2.8091	-2.8091	-2.8091	-2.8091	2.35186	-2.8091	-2.8091
rno-piR-11593	-0.497571	-1.21021	-0.284903	-0.817012	-0.691621	-0.403412	2.54268	-2.8091	-2.8091	-0.291042	-2.8091	-2.8091	-2.8091	-2.8091	-2.8091	-2.8091	-2.8091	-0.401497	-2.8091	-2.8091	-2.8091	-2.8091	-2.8091	-2.8091
rno-piR-11594	-2.8091	-2.8091	-1.17414	-2.8091	-0.691621	-2.8091	-2.8091	-2.8091	-2.8091	-2.8091	-2.8091	-2.8091	-2.8091	-2.8091	-2.8091	-2.8091	-2.8091	-0.401497	1.34924	-2.8091	-2.8091	0.563112	-2.8091	-2.8091
rno-piR-11595	-2.8091	-2.8091	-1.9595	-2.8091	-2.8091	-2.8091	-2.8091	-2.8091	-2.8091	-2.8091	-2.8091	-2.8091	-2.8091	-2.8091	-2.8091	-2.8091	-2.8091	-2.8091	-2.8091	-2.8091	-2.8091	-2.8091	-2.8091	-2.8091
rno-piR-11596	-2.8091	-2.8091	-0.594968	-2.8091	-2.8091	-2.8091	-2.8091	-2.8091	-2.8091	-2.8091	-2.8091	-2.8091	-2.8091	-2.8091	-2.8091	-2.8091	-0.912094	0.340829	-2.8091	-2.8091	-2.8091	-2.8091	-2.8091	-2.8091
rno-piR-11599	1.7829	1.91491	2.96725	4.09965	2.92905	3.04351	4.48953	3.72427	3.24626	3.11033	4.62809	4.53119	-2.8091	2.17888	3.43517	3.86829	2.18467	2.86055	3.10564	6.18506	-2.8091	5.32475	-2.8091	-2.8091
rno-piR-116	-2.8091	-2.8091	-2.8091	-2.8091	-2.8091	-2.8091	-2.8091	2.44751	-2.8091	-2.8091	-2.8091	-2.8091	-2.8091	-2.8091	4.99476	-2.8091	-2.8091	-2.8091	-2.8091	-2.8091	-2.8091	0.563112	-2.8091	-2.8091
rno-piR-1160	-0.497571	-2.8091	-1.9595	-2.8091	-2.8091	-2.8091	-2.8091	-2.8091	-2.8091	-2.8091	-2.8091	-2.8091	-2.8091	-2.8091	-2.8091	-2.8091	-2.8091	-2.8091	-2.8091	-2.8091	-2.8091	-2.8091	-2.8091	-2.8091
rno-piR-11600	-2.8091	-2.8091	-2.8091	-2.8091	-2.8091	-2.8091	-2.8091	-2.8091	-2.8091	-2.8091	-2.8091	-2.8091	-2.8091	-2.8091	-2.8091	-2.8091	-2.8091	-0.401497	-2.8091	-2.8091	-2.8091	-2.8091	-2.8091	-2.8091
rno-piR-11601	-2.8091	-2.8091	-1.00219	-2.8091	-0.691621	-2.8091	-2.8091	-2.8091	-2.8091	-0.291042	-2.8091	-2.8091	-2.8091	-0.203124	-2.8091	3.86829	-0.912094	-2.8091	0.838007	-2.8091	-2.8091	-2.8091	-2.8091	-2.8091
rno-piR-11603	-2.8091	-2.8091	-0.380507	-2.8091	-0.691621	-2.8091	-2.8091	-2.8091	-2.8091	-2.8091	-2.8091	-2.8091	-2.8091	-2.8091	-2.8091	-2.8091	-2.8091	-2.8091	-2.8091	-2.8091	-2.8091	-2.8091	-2.8091	-2.8091
rno-piR-11604	4.33328	1.14769	1.6466	0.290504	1.68365	3.66953	4.98666	4.47703	2.2881	2.80006	6.56328	3.54872	-2.8091	1.26331	5.98831	3.24624	-0.912094	-0.401497	3.44343	6.70121	-2.8091	2.65797	4.37244	-2.8091
rno-piR-11606	-2.8091	-2.8091	-1.00219	-2.8091	-2.8091	-2.8091	-2.8091	-2.8091	-2.8091	-2.8091	-2.8091	-2.8091	-2.8091	-2.8091	-2.8091	-2.8091	-2.8091	-2.8091	-2.8091	-2.8091	-2.8091	-2.8091	-2.8091	-2.8091
rno-piR-11607	-2.8091	-2.8091	-2.8091	-2.8091	-2.8091	-2.8091	-2.8091	-2.8091	-2.8091	-2.8091	-2.8091	-2.8091	-2.8091	-2.8091	-2.8091	1.21556	-2.8091	-2.8091	-2.8091	1.5964	-2.8091	-2.8091	-2.8091	-2.8091
rno-piR-11608	-2.8091	-2.8091	-2.8091	-2.8091	-2.8091	-2.8091	-2.8091	-2.8091	-2.8091	1.32461	-2.8091	-2.8091	-2.8091	-2.8091	-2.8091	-2.8091	-2.8091	-2.8091	-2.8091	-2.8091	-2.8091	-2.8091	-2.8091	-2.8091
rno-piR-1161	-2.8091	-2.8091	-1.62376	0.290504	-2.8091	-0.403412	-2.8091	-2.8091	-2.8091	-0.291042	3.83307	-2.8091	-2.8091	-0.857667	-2.8091	-2.8091	-0.912094	-0.401497	-2.8091	-2.8091	-2.8091	2.65797	-2.8091	-2.8091
rno-piR-11610	-0.497571	-1.21021	-0.851482	-0.817012	-0.00243066	0.338593	-2.8091	-2.8091	-2.8091	-0.291042	-2.8091	-2.8091	-2.8091	0.236575	-2.8091	-2.8091	-0.912094	-2.8091	0.0317522	2.22447	-2.8091	-2.8091	-2.8091	-2.8091
rno-piR-11611	-2.8091	-2.8091	-0.716865	-2.8091	-2.8091	-2.8091	-2.8091	-2.8091	-2.8091	-2.8091	-2.8091	-2.8091	-2.8091	-0.857667	-2.8091	-2.8091	-0.912094	-0.401497	0.838007	-2.8091	-2.8091	-2.8091	-2.8091	-2.8091
rno-piR-11612	-2.8091	-2.8091	-2.8091	-2.8091	-2.8091	-0.403412	-2.8091	-2.8091	-2.8091	-2.8091	-2.8091	-2.8091	-2.8091	-2.8091	-2.8091	-2.8091	-2.8091	-2.8091	-2.8091	-2.8091	-2.8091	-2.8091	-2.8091	-2.8091
rno-piR-11614	-0.497571	-2.8091	-1.17414	-2.8091	-0.691621	-0.403412	-2.8091	-2.8091	-2.8091	-2.8091	-2.8091	-2.8091	-2.8091	-0.203124	-2.8091	-2.8091	-2.8091	-2.8091	-2.8091	-2.8091	-2.8091	-2.8091	-2.8091	-2.8091
rno-piR-11615	-2.8091	-2.8091	-0.851482	-2.8091	-0.691621	-2.8091	-2.8091	0.646749	-2.8091	-2.8091	-2.8091	-2.8091	-2.8091	-0.203124	-2.8091	-2.8091	-0.269622	0.340829	-2.8091	-2.8091	-2.8091	-2.8091	-2.8091	-2.8091
rno-piR-11616	-0.497571	0.0587823	0.92937	2.5869	-0.00243066	0.821078	1.08683	-2.8091	-2.8091	3.28537	-2.8091	-2.8091	-2.8091	0.236575	3.43517	-2.8091	-0.269622	0.340829	1.72527	4.84976	-2.8091	2.65797	-2.8091	-2.8091
rno-piR-11617	-2.8091	-2.8091	-1.9595	-2.8091	-0.691621	-2.8091	-2.8091	-2.8091	-2.8091	-2.8091	-2.8091	-2.8091	-2.8091	-2.8091	-2.8091	-2.8091	-2.8091	-2.8091	-2.8091	-2.8091	-2.8091	-2.8091	-2.8091	-2.8091
rno-piR-11618	-2.8091	-2.8091	-2.8091	-2.8091	-2.8091	-2.8091	-2.8091	-2.8091	-2.8091	-2.8091	-2.8091	-2.8091	-2.8091	-2.8091	-2.8091	-2.8091	-0.912094	-2.8091	-2.8091	-2.8091	-2.8091	-2.8091	-2.8091	-2.8091
rno-piR-11619	0.228153	-2.8091	-2.8091	-2.8091	-2.8091	-2.8091	-2.8091	-2.8091	-2.8091	-2.8091	-2.8091	-2.8091	-2.8091	-2.8091	-2.8091	-2.8091	-2.8091	-2.8091	-2.8091	-2.8091	-2.8091	-2.8091	5.68245	-2.8091
rno-piR-1162	-2.8091	-2.8091	0.675187	-2.8091	0.79938	-0.403412	-2.8091	-2.8091	-2.8091	-2.8091	-2.8091	-2.8091	-2.8091	-2.8091	-2.8091	-2.8091	1.1807	0.340829	-2.8091	-2.8091	-2.8091	-2.8091	-2.8091	-2.8091
rno-piR-11621	1.7829	-2.8091	-0.483425	1.32426	0.454729	0.338593	-2.8091	-2.8091	-2.8091	2.67978	-2.8091	-2.8091	-2.8091	-2.8091	-2.8091	-2.8091	-0.912094	-2.8091	0.0317522	-2.8091	-2.8091	-2.8091	-2.8091	-2.8091
rno-piR-11623	-2.8091	-2.8091	-0.851482	-2.8091	-0.691621	-2.8091	-2.8091	-2.8091	-2.8091	-2.8091	-2.8091	-2.8091	-2.8091	-2.8091	-2.8091	-2.8091	-0.269622	-2.8091	-2.8091	-2.8091	-2.8091	-2.8091	-2.8091	-2.8091
rno-piR-11624	-2.8091	-2.8091	-1.37586	-2.8091	-0.691621	-2.8091	-2.8091	-2.8091	-2.8091	-2.8091	-2.8091	-2.8091	-2.8091	-2.8091	-2.8091	-2.8091	-2.8091	-2.8091	0.0317522	-2.8091	-2.8091	-2.8091	-2.8091	-2.8091
rno-piR-11625	-2.8091	-2.8091	-1.62376	-2.8091	-2.8091	-0.403412	-2.8091	-2.8091	-2.8091	-2.8091	-2.8091	-2.8091	-2.8091	-2.8091	-2.8091	-2.8091	-2.8091	-2.8091	-2.8091	-2.8091	-2.8091	-2.8091	-2.8091	-2.8091
rno-piR-11626	0.702996	-1.21021	-1.9595	-2.8091	-2.8091	-2.8091	-2.8091	-2.8091	-2.8091	-2.8091	-2.8091	-2.8091	-2.8091	-0.857667	-2.8091	-2.8091	-2.8091	-2.8091	-2.8091	-2.8091	-2.8091	-2.8091	-2.8091	-2.8091
rno-piR-11627	1.34239	1.0149	2.23633	2.14282	1.50838	1.46788	1.99161	-2.8091	-2.8091	1.32461	-2.8091	-2.8091	-2.8091	1.7281	-2.8091	-2.8091	2.18467	-0.401497	1.72527	2.89147	-2.8091	-2.8091	-2.8091	-2.8091
rno-piR-11628	-2.8091	-2.8091	-1.00219	-2.8091	-0.00243066	-2.8091	-2.8091	-2.8091	-2.8091	-2.8091	-2.8091	-2.8091	-2.8091	-2.8091	-2.8091	-2.8091	-2.8091	-0.401497	-2.8091	-2.8091	-2.8091	-2.8091	-2.8091	-2.8091
rno-piR-11631	-2.8091	-2.8091	-1.62376	-2.8091	-2.8091	-2.8091	-2.8091	-2.8091	-2.8091	-2.8091	-2.8091	-2.8091	-2.8091	-2.8091	-2.8091	-2.8091	-2.8091	-2.8091	-2.8091	-2.8091	-2.8091	-2.8091	-2.8091	-2.8091
rno-piR-11632	-0.497571	-2.8091	-1.37586	-2.8091	-2.8091	-2.8091	-2.8091	-2.8091	-2.8091	-2.8091	-2.8091	-2.8091	-2.8091	-2.8091	-2.8091	-2.8091	-2.8091	-2.8091	0.0317522	-2.8091	-2.8091	-2.8091	-2.8091	-2.8091
rno-piR-11634	-0.497571	-2.8091	-1.9595	-2.8091	-2.8091	-2.8091	-2.8091	-2.8091	-2.8091	0.960112	-2.8091	6.02217	-2.8091	-2.8091	-2.8091	-2.8091	-2.8091	-2.8091	-2.8091	-2.8091	-2.8091	4.29117	4.11334	-2.8091
rno-piR-11635	-2.8091	-2.8091	-2.8091	-2.8091	-2.8091	-2.8091	-2.8091	-2.8091	-2.8091	-2.8091	-2.8091	-2.8091	-2.8091	-0.857667	-2.8091	-2.8091	-2.8091	-0.401497	-2.8091	-2.8091	-2.8091	-2.8091	-2.8091	-2.8091
rno-piR-11636	-2.8091	-2.8091	-1.37586	-2.8091	-2.8091	-2.8091	-2.8091	-2.8091	-2.8091	-2.8091	-2.8091	-2.8091	-2.8091	-0.857667	-2.8091	-2.8091	-2.8091	-2.8091	-2.8091	-2.8091	-2.8091	-2.8091	-2.8091	-2.8091
rno-piR-11637	0.702996	-2.8091	-0.284903	-0.817012	-0.691621	2.39445	-2.8091	-2.8091	-2.8091	-2.8091	1.01527	-2.8091	-2.8091	-2.8091	-2.8091	-2.8091	-0.912094	-2.8091	-2.8091	-2.8091	-2.8091	-2.8091	-2.8091	5.12672
rno-piR-11638	-2.8091	-2.8091	-1.9595	-2.8091	-2.8091	-2.8091	-2.8091	-2.8091	-2.8091	-2.8091	-2.8091	-2.8091	-2.8091	-2.8091	-2.8091	-2.8091	-2.8091	-2.8091	-2.8091	-2.8091	-2.8091	-2.8091	-2.8091	-2.8091
rno-piR-11639	-2.8091	-2.8091	-1.62376	-2.8091	-2.8091	-2.8091	-2.8091	-2.8091	-2.8091	-2.8091	-2.8091	-2.8091	-2.8091	-2.8091	-2.8091	-2.8091	-2.8091	-2.8091	-2.8091	-2.8091	-2.8091	-2.8091	-2.8091	-2.8091
rno-piR-1164	-2.8091	-2.8091	-1.9595	-2.8091	-2.8091	-2.8091	2.94032	-2.8091	-2.8091	-2.8091	-2.8091	-2.8091	-2.8091	0.570591	-2.8091	-2.8091	-2.8091	-2.8091	-2.8091	-2.8091	-2.8091	-2.8091	-2.8091	-2.8091
rno-piR-11640	1.05817	0.308753	1.69288	1.12746	0.79938	-2.8091	-2.8091	-2.8091	-2.8091	-0.291042	1.01527	-2.8091	-2.8091	1.06754	-2.8091	-2.8091	1.35176	0.823464	-2.8091	-2.8091	-2.8091	-2.8091	-2.8091	-2.8091
rno-piR-11641	-2.8091	-1.21021	-0.0327353	-2.8091	-0.691621	-0.403412	-2.8091	-2.8091	-2.8091	-2.8091	-2.8091	-2.8091	-2.8091	-2.8091	-2.8091	-2.8091	-2.8091	0.823464	-2.8091	-2.8091	-2.8091	-2.8091	-2.8091	4.06915
rno-piR-11643	-2.8091	-0.640445	-0.483425	0.627278	-2.8091	0.338593	2.94032	2.44751	-2.8091	4.34561	1.9153	2.98098	-2.8091	-2.8091	-2.8091	-2.8091	-2.8091	0.340829	2.26962	2.89147	-2.8091	5.18827	3.39198	4.90628
rno-piR-11644	-2.8091	-2.8091	-0.851482	-2.8091	-2.8091	-2.8091	-2.8091	-2.8091	-2.8091	-2.8091	-2.8091	-2.8091	-2.8091	-2.8091	-2.8091	-2.8091	-2.8091	-0.401497	-2.8091	-2.8091	-2.8091	-2.8091	-2.8091	-2.8091
rno-piR-11645	1.05817	0.0587823	0.579244	0.290504	-0.00243066	0.338593	2.54268	-2.8091	-2.8091	-0.291042	-2.8091	-2.8091	-2.8091	0.570591	-2.8091	-2.8091	-2.8091	-0.401497	0.838007	2.04396	-2.8091	0.563112	-2.8091	-2.8091
rno-piR-11646	-2.8091	-2.8091	-1.62376	-2.8091	-2.8091	-0.403412	-2.8091	-2.8091	-2.8091	-2.8091	-2.8091	-2.8091	-2.8091	-0.857667	-2.8091	-2.8091	-2.8091	-2.8091	-2.8091	-2.8091	-2.8091	-2.8091	-2.8091	-2.8091
rno-piR-11647	-2.8091	-2.8091	-2.8091	-2.8091	-2.8091	-2.8091	-2.8091	-2.8091	-2.8091	-2.8091	-2.8091	-2.8091	-2.8091	-2.8091	-2.8091	-2.8091	-2.8091	-2.8091	-2.8091	0.942549	-2.8091	-2.8091	-2.8091	-2.8091
rno-piR-11648	-2.8091	-2.8091	-0.851482	-2.8091	-2.8091	-2.8091	-2.8091	-2.8091	-2.8091	-2.8091	-2.8091	-2.8091	-2.8091	-0.203124	-2.8091	-2.8091	-2.8091	-0.401497	0.0317522	-2.8091	-2.8091	-2.8091	-2.8091	-2.8091
rno-piR-11649	-0.497571	-0.246323	-0.594968	0.290504	-0.691621	0.338593	1.08683	1.51844	-2.8091	3.11033	2.46457	-2.8091	-2.8091	-2.8091	-2.8091	-2.8091	-2.8091	-2.8091	0.838007	2.99449	-2.8091	-2.8091	2.82617	-2.8091
rno-piR-1165	-2.8091	-2.8091	-1.17414	-2.8091	-0.691621	-2.8091	-2.8091	0.646749	-2.8091	-2.8091	-2.8091	-2.8091	-2.8091	-0.857667	-2.8091	-2.8091	-2.8091	-2.8091	0.0317522	-2.8091	-2.8091	-2.8091	-2.8091	-2.8091
rno-piR-11652	0.228153	-2.8091	-1.62376	-2.8091	-2.8091	-0.403412	-2.8091	-2.8091	-2.8091	-2.8091	-2.8091	-2.8091	-2.8091	-2.8091	-2.8091	-2.8091	-2.8091	-2.8091	0.0317522	0.942549	-2.8091	-2.8091	-2.8091	-2.8091
rno-piR-11653	-2.8091	-2.8091	-2.8091	-2.8091	0.454729	-2.8091	-2.8091	-2.8091	-2.8091	-2.8091	-2.8091	-2.8091	-2.8091	-2.8091	-2.8091	-2.8091	-2.8091	-0.401497	-2.8091	-2.8091	-2.8091	-2.8091	-2.8091	-2.8091
rno-piR-11655	0.228153	-2.8091	-1.62376	-2.8091	-2.8091	-2.8091	-2.8091	-2.8091	-2.8091	-2.8091	-2.8091	-2.8091	-2.8091	-2.8091	-2.8091	-2.8091	-2.8091	-2.8091	-2.8091	-2.8091	-2.8091	-2.8091	-2.8091	-2.8091
rno-piR-11656	-2.8091	-2.8091	-1.9595	-2.8091	-2.8091	-2.8091	-2.8091	-2.8091	-2.8091	-2.8091	-2.8091	-2.8091	-2.8091	-2.8091	-2.8091	3.24624	-2.8091	-2.8091	-2.8091	-2.8091	-2.8091	-2.8091	-2.8091	-2.8091
rno-piR-11659	-2.8091	-2.8091	-0.594968	0.290504	-0.691621	-2.8091	1.99161	-2.8091	-2.8091	-0.291042	-2.8091	-2.8091	-2.8091	-2.8091	-2.8091	-2.8091	-0.912094	-2.8091	-2.8091	-2.8091	-2.8091	1.96264	-2.8091	-2.8091
rno-piR-11660	-2.8091	-1.21021	-1.17414	-2.8091	-2.8091	-2.8091	-2.8091	-2.8091	-2.8091	-2.8091	-2.8091	-2.8091	-2.8091	-2.8091	-2.8091	-2.8091	-2.8091	-2.8091	-2.8091	-2.8091	-2.8091	-2.8091	-2.8091	-2.8091
rno-piR-11662	-2.8091	-2.8091	-1.62376	-2.8091	-2.8091	-2.8091	-2.8091	-2.8091	-2.8091	-2.8091	-2.8091	-2.8091	-2.8091	-2.8091	-2.8091	-2.8091	-2.8091	-2.8091	-2.8091	-2.8091	-2.8091	-2.8091	-2.8091	-2.8091
rno-piR-11663	-2.8091	-2.8091	-1.9595	-2.8091	-2.8091	-2.8091	-2.8091	-2.8091	-2.8091	-2.8091	-2.8091	-2.8091	-2.8091	-2.8091	-2.8091	-2.8091	-2.8091	-2.8091	0.0317522	2.52915	-2.8091	-2.8091	-2.8091	-2.8091
rno-piR-11664	-2.8091	-2.8091	-2.8091	-2.8091	-2.8091	-2.8091	-2.8091	-2.8091	-2.8091	-2.8091	-2.8091	-2.8091	-2.8091	-2.8091	-2.8091	-2.8091	-2.8091	-2.8091	0.838007	-2.8091	-2.8091	-2.8091	-2.8091	-2.8091
rno-piR-11665	0.228153	-2.8091	-1.37586	-0.153685	-0.00243066	-2.8091	3.25166	-2.8091	-2.8091	-2.8091	-2.8091	-2.8091	-2.8091	-2.8091	-2.8091	-2.8091	-0.912094	-0.401497	0.0317522	-2.8091	-2.8091	3.88307	-2.8091	-2.8091
rno-piR-11668	-2.8091	-2.8091	-0.380507	-2.8091	-2.8091	-2.8091	-2.8091	-2.8091	-2.8091	-2.8091	-2.8091	-2.8091	-2.8091	-2.8091	-2.8091	-2.8091	-0.912094	-2.8091	-2.8091	-2.8091	-2.8091	-2.8091	-2.8091	-2.8091
rno-piR-1167	-0.497571	1.2692	1.8234	3.70137	2.43696	2.0914	4.08054	3.00764	-2.8091	3.44144	4.28467	7.54528	-2.8091	0.840636	-2.8091	0.370133	0.986392	-0.401497	2.02303	5.94903	11.3119	2.35186	-2.8091	4.82462
rno-piR-11670	-2.8091	-2.8091	-2.8091	-2.8091	-2.8091	-2.8091	-2.8091	-2.8091	-2.8091	-0.291042	-2.8091	-2.8091	-2.8091	-2.8091	-2.8091	-2.8091	-2.8091	-0.401497	0.0317522	-2.8091	-2.8091	-2.8091	-2.8091	-2.8091
rno-piR-11671	-2.8091	-2.8091	-2.8091	-2.8091	-2.8091	-2.8091	-2.8091	-2.8091	-2.8091	-2.8091	-2.8091	-2.8091	-2.8091	-0.857667	-2.8091	-2.8091	-2.8091	-2.8091	-2.8091	0.45269	-2.8091	-2.8091	-2.8091	-2.8091
rno-piR-11672	-2.8091	-0.640445	-1.62376	-2.8091	-2.8091	-2.8091	-2.8091	-2.8091	-2.8091	-2.8091	2.86126	-2.8091	-2.8091	-2.8091	-2.8091	-2.8091	-2.8091	-2.8091	-2.8091	-2.8091	-2.8091	-2.8091	-2.8091	-2.8091
rno-piR-11673	-2.8091	-2.8091	-2.8091	-2.8091	-2.8091	-2.8091	-2.8091	-2.8091	-2.8091	-2.8091	-2.8091	-2.8091	-2.8091	-2.8091	-2.8091	0.370133	-2.8091	-2.8091	-2.8091	-2.8091	-2.8091	-2.8091	-2.8091	-2.8091
rno-piR-11674	-2.8091	-1.21021	-2.8091	-2.8091	-2.8091	-2.8091	-2.8091	0.646749	-2.8091	0.469226	-2.8091	-2.8091	-2.8091	-2.8091	-2.8091	-2.8091	-2.8091	-2.8091	-2.8091	-2.8091	-2.8091	-2.8091	-2.8091	-2.8091
rno-piR-11675	-2.8091	-2.8091	-2.8091	-2.8091	-2.8091	-2.8091	-2.8091	-2.8091	-2.8091	-2.8091	-2.8091	-2.8091	-2.8091	-2.8091	-2.8091	-2.8091	-2.8091	-2.8091	-2.8091	-0.305325	-2.8091	-2.8091	-2.8091	-2.8091
rno-piR-11676	-2.8091	-2.8091	-2.8091	-2.8091	-2.8091	-2.8091	-2.8091	-2.8091	-2.8091	-2.8091	-2.8091	-2.8091	-2.8091	-2.8091	-2.8091	-2.8091	-2.8091	-2.8091	0.838007	-2.8091	-2.8091	-2.8091	-2.8091	-2.8091
rno-piR-11677	-0.497571	-2.8091	-1.62376	-2.8091	-2.8091	-2.8091	-2.8091	-2.8091	-2.8091	-2.8091	-2.8091	-2.8091	-2.8091	-0.857667	-2.8091	-2.8091	-0.269622	-2.8091	-2.8091	-2.8091	-2.8091	-2.8091	-2.8091	-2.8091
rno-piR-11679	0.228153	-2.8091	-1.9595	-2.8091	-2.8091	-0.403412	2.94032	2.44751	2.2881	2.24363	-2.8091	-2.8091	-2.8091	-0.857667	-2.8091	-2.8091	-2.8091	-2.8091	-2.8091	-2.8091	-2.8091	4.1015	-2.8091	-2.8091
rno-piR-1168	-2.8091	-2.8091	-1.62376	-2.8091	-0.691621	-2.8091	-2.8091	-2.8091	-2.8091	-2.8091	-2.8091	-2.8091	-2.8091	-2.8091	-2.8091	-2.8091	-2.8091	-2.8091	-2.8091	-2.8091	-2.8091	-2.8091	-2.8091	-2.8091
rno-piR-11680	-2.8091	-2.8091	-2.8091	-2.8091	-2.8091	-2.8091	-2.8091	-2.8091	-2.8091	-2.8091	-2.8091	-2.8091	-2.8091	-2.8091	-2.8091	-2.8091	-2.8091	-2.8091	0.0317522	-2.8091	-2.8091	-2.8091	-2.8091	-2.8091
rno-piR-11681	-2.8091	-2.8091	-1.37586	-0.817012	-2.8091	-0.403412	-2.8091	-2.8091	2.2881	-2.8091	-2.8091	-2.8091	-2.8091	-2.8091	-2.8091	-2.8091	-2.8091	-2.8091	-2.8091	-2.8091	-2.8091	-2.8091	-2.8091	-2.8091
rno-piR-11683	-2.8091	-2.8091	-1.9595	-2.8091	-2.8091	-2.8091	-2.8091	-2.8091	-2.8091	-2.8091	-2.8091	-2.8091	-2.8091	-2.8091	-2.8091	-2.8091	-2.8091	-2.8091	-2.8091	-2.8091	-2.8091	-2.8091	-2.8091	-2.8091
rno-piR-11685	-2.8091	-2.8091	-1.9595	-2.8091	-2.8091	-2.8091	-2.8091	-2.8091	-2.8091	-2.8091	-2.8091	-2.8091	-2.8091	-2.8091	-2.8091	-2.8091	-0.912094	-2.8091	-2.8091	-2.8091	-2.8091	-2.8091	-2.8091	-2.8091
rno-piR-11686	-2.8091	-2.8091	-1.62376	-2.8091	-0.691621	-2.8091	-2.8091	-2.8091	-2.8091	-2.8091	-2.8091	-2.8091	-2.8091	-0.857667	-2.8091	-2.8091	-2.8091	-0.401497	-2.8091	-2.8091	-2.8091	-2.8091	-2.8091	-2.8091
rno-piR-11687	-2.8091	-1.21021	-0.594968	-2.8091	-2.8091	-2.8091	-2.8091	-2.8091	-2.8091	-2.8091	3.6445	-2.8091	-2.8091	-2.8091	-2.8091	-2.8091	-2.8091	-2.8091	-2.8091	-2.8091	-2.8091	-2.8091	-2.8091	-2.8091
rno-piR-11688	-2.8091	-2.8091	-2.8091	-2.8091	-2.8091	-2.8091	-2.8091	-2.8091	-2.8091	-2.8091	-2.8091	-2.8091	-2.8091	-2.8091	-2.8091	-2.8091	-2.8091	-2.8091	-2.8091	1.30646	-2.8091	-2.8091	-2.8091	-2.8091
rno-piR-11689	-2.8091	-0.640445	-1.37586	-2.8091	-2.8091	-2.8091	-2.8091	-2.8091	-2.8091	-2.8091	-2.8091	-2.8091	-2.8091	-2.8091	-2.8091	-2.8091	-2.8091	-2.8091	-2.8091	-2.8091	-2.8091	-2.8091	-2.8091	-2.8091
rno-piR-11690	-2.8091	-2.8091	-0.284903	-2.8091	-0.691621	-0.403412	-2.8091	-2.8091	-2.8091	-2.8091	-2.8091	-2.8091	-2.8091	-2.8091	-2.8091	-2.8091	-0.912094	-2.8091	-2.8091	-2.8091	-2.8091	-2.8091	-2.8091	-2.8091
rno-piR-11691	-2.8091	-2.8091	-1.9595	-2.8091	-0.00243066	-2.8091	-2.8091	-2.8091	-2.8091	-2.8091	-2.8091	-2.8091	-2.8091	-2.8091	-2.8091	-2.8091	-2.8091	-2.8091	-2.8091	-2.8091	-2.8091	-2.8091	-2.8091	-2.8091
rno-piR-11692	-2.8091	-2.8091	-1.9595	-2.8091	-2.8091	-2.8091	-2.8091	-2.8091	-2.8091	-2.8091	-2.8091	-2.8091	-2.8091	-2.8091	-2.8091	-2.8091	-2.8091	-2.8091	-2.8091	-2.8091	-2.8091	-2.8091	-2.8091	-2.8091
rno-piR-11698	4.39653	2.65405	4.24995	3.59143	3.34816	3.35557	4.98666	2.05668	-2.8091	0.960112	-2.8091	6.25568	-2.8091	2.73401	-2.8091	4.51016	3.9931	4.02141	3.94674	5.75734	-2.8091	0.563112	-2.8091	3.56495
rno-piR-1170	-2.8091	-2.8091	-1.9595	-0.817012	-2.8091	-2.8091	1.08683	-2.8091	-2.8091	-2.8091	-2.8091	-2.8091	-2.8091	-0.857667	-2.8091	-2.8091	-2.8091	-2.8091	-2.8091	-2.8091	-2.8091	-2.8091	-2.8091	-2.8091
rno-piR-11700	-0.497571	-2.8091	-2.8091	-2.8091	-2.8091	-2.8091	-2.8091	2.75461	-2.8091	-2.8091	-2.8091	-2.8091	-2.8091	-2.8091	-2.8091	-2.8091	-0.912094	-2.8091	-2.8091	3.91727	-2.8091	-2.8091	-2.8091	-2.8091
rno-piR-11701	0.702996	0.0587823	0.306354	1.65165	-0.691621	-0.403412	-2.8091	-2.8091	-2.8091	-2.8091	-2.8091	5.39758	-2.8091	0.570591	-2.8091	-2.8091	-0.269622	1.47041	0.838007	-2.8091	-2.8091	-2.8091	-2.8091	-2.8091
rno-piR-11702	-2.8091	-2.8091	-1.62376	-2.8091	-2.8091	-2.8091	-2.8091	-2.8091	-2.8091	-2.8091	-2.8091	-2.8091	-2.8091	-2.8091	-2.8091	-2.8091	-2.8091	-2.8091	-2.8091	-2.8091	-2.8091	-2.8091	-2.8091	-2.8091
rno-piR-11703	-0.497571	0.705286	3.27119	1.79104	1.68365	-0.403412	-2.8091	-2.8091	-2.8091	-2.8091	-2.8091	6.02217	-2.8091	2.52167	4.41621	-2.8091	2.09138	1.47041	1.72527	-0.305325	-2.8091	-2.8091	-2.8091	-2.8091
rno-piR-11704	-2.8091	-1.21021	-2.8091	-2.8091	-2.8091	-2.8091	-2.8091	-2.8091	-2.8091	-2.8091	-2.8091	-2.8091	-2.8091	-2.8091	-2.8091	-2.8091	-2.8091	-0.401497	-2.8091	-2.8091	-2.8091	-2.8091	-2.8091	-2.8091
rno-piR-11705	-2.8091	-2.8091	-1.62376	-2.8091	-2.8091	-2.8091	-2.8091	-2.8091	-2.8091	-2.8091	-2.8091	-2.8091	-2.8091	-2.8091	-2.8091	-2.8091	-2.8091	-2.8091	0.0317522	-2.8091	-2.8091	-2.8091	-2.8091	-2.8091
rno-piR-11708	-0.497571	-2.8091	-1.37586	-2.8091	-2.8091	-0.403412	-2.8091	-2.8091	-2.8091	-2.8091	-2.8091	-2.8091	-2.8091	-0.857667	-2.8091	2.68242	-2.8091	-2.8091	-2.8091	-2.8091	-2.8091	1.96264	-2.8091	3.56495
rno-piR-11711	-2.8091	-2.8091	-1.17414	-2.8091	-2.8091	-2.8091	-2.8091	-2.8091	-2.8091	-2.8091	-2.8091	-2.8091	-2.8091	-2.8091	-2.8091	-2.8091	-2.8091	-2.8091	-2.8091	-2.8091	-2.8091	-2.8091	-2.8091	-2.8091
rno-piR-11712	-0.497571	-2.8091	-1.37586	-0.817012	-2.8091	-2.8091	-2.8091	-2.8091	-2.8091	-2.8091	-2.8091	-2.8091	-2.8091	-2.8091	-2.8091	-2.8091	-2.8091	-2.8091	-2.8091	-2.8091	-2.8091	-2.8091	-2.8091	2.78304
rno-piR-11713	-2.8091	-1.21021	-0.483425	-0.817012	-2.8091	-2.8091	-2.8091	-2.8091	-2.8091	0.960112	-2.8091	-2.8091	-2.8091	-0.203124	-2.8091	-2.8091	-0.269622	0.340829	-2.8091	3.86386	-2.8091	-2.8091	-2.8091	-2.8091
rno-piR-11715	-2.8091	-2.8091	-1.62376	-2.8091	-0.691621	-2.8091	-2.8091	1.51844	-2.8091	-0.291042	-2.8091	-2.8091	-2.8091	-2.8091	-2.8091	-2.8091	-2.8091	-2.8091	-2.8091	-2.8091	-2.8091	-2.8091	-2.8091	-2.8091
rno-piR-11717	-2.8091	-2.8091	-0.851482	-2.8091	-2.8091	-2.8091	-2.8091	-2.8091	-2.8091	-2.8091	-2.8091	-2.8091	-2.8091	-2.8091	-2.8091	-2.8091	-2.8091	-2.8091	-2.8091	-2.8091	-2.8091	-2.8091	-2.8091	-2.8091
rno-piR-11718	-2.8091	-2.8091	-1.37586	-2.8091	-0.691621	-2.8091	-2.8091	-2.8091	-2.8091	-2.8091	-2.8091	-2.8091	-2.8091	-2.8091	-2.8091	-2.8091	-0.912094	-2.8091	-2.8091	-2.8091	-2.8091	-2.8091	-2.8091	-2.8091
rno-piR-1172	-2.8091	-2.8091	-2.8091	-0.817012	-2.8091	-2.8091	-2.8091	-2.8091	-2.8091	-2.8091	-2.8091	-2.8091	-2.8091	-0.857667	-2.8091	-2.8091	-2.8091	-2.8091	-2.8091	-2.8091	-2.8091	0.563112	-2.8091	-2.8091
rno-piR-11720	-2.8091	-1.21021	-1.37586	-0.817012	-0.691621	-2.8091	-2.8091	-2.8091	-2.8091	-2.8091	-2.8091	-2.8091	-2.8091	-0.857667	-2.8091	-2.8091	-2.8091	-2.8091	-2.8091	-2.8091	-2.8091	-2.8091	-2.8091	-2.8091
rno-piR-11721	-2.8091	-2.8091	-2.8091	-0.817012	-2.8091	-2.8091	-2.8091	-2.8091	-2.8091	-2.8091	-2.8091	-2.8091	-2.8091	-2.8091	-2.8091	-2.8091	-2.8091	-2.8091	-2.8091	-2.8091	-2.8091	-2.8091	-2.8091	-2.8091
rno-piR-11725	-2.8091	-1.21021	-1.62376	-2.8091	-2.8091	-0.403412	-2.8091	-2.8091	-2.8091	-2.8091	-2.8091	-2.8091	-2.8091	-0.857667	-2.8091	-2.8091	-0.912094	-0.401497	0.0317522	-2.8091	-2.8091	-2.8091	-2.8091	-2.8091
rno-piR-11726	-2.8091	-0.640445	-0.594968	-0.817012	-2.8091	-2.8091	-2.8091	3.57569	-2.8091	1.61494	-2.8091	2.03091	-2.8091	-0.857667	-2.8091	-2.8091	-0.912094	-0.401497	-2.8091	-2.8091	-2.8091	-2.8091	-2.8091	-2.8091
rno-piR-11727	-2.8091	-2.8091	-0.594968	-2.8091	-2.8091	-2.8091	-2.8091	-2.8091	-2.8091	-2.8091	1.01527	-2.8091	-2.8091	-2.8091	-2.8091	-2.8091	-2.8091	-2.8091	-2.8091	-2.8091	-2.8091	-2.8091	-2.8091	-2.8091
rno-piR-11728	-2.8091	-2.8091	-2.8091	-2.8091	-2.8091	-0.403412	-2.8091	-2.8091	-2.8091	-2.8091	-2.8091	-2.8091	-2.8091	-2.8091	-2.8091	-2.8091	-2.8091	-2.8091	-2.8091	-2.8091	-2.8091	-2.8091	-2.8091	-2.8091
rno-piR-11729	-0.497571	-2.8091	-1.62376	-2.8091	-2.8091	-2.8091	-2.8091	-2.8091	-2.8091	-2.8091	-2.8091	-2.8091	-2.8091	-2.8091	-2.8091	-2.8091	-2.8091	-2.8091	-2.8091	-2.8091	-2.8091	-2.8091	-2.8091	-2.8091
rno-piR-1173	-2.8091	-2.8091	-1.62376	-2.8091	-2.8091	0.338593	-2.8091	-2.8091	-2.8091	1.85633	-2.8091	-2.8091	-2.8091	-2.8091	7.1003	-2.8091	-2.8091	-2.8091	0.0317522	-2.8091	4.15506	-2.8091	-2.8091	-2.8091
rno-piR-11732	-0.497571	-2.8091	-0.483425	-0.817012	-0.691621	0.338593	-2.8091	-2.8091	-2.8091	-2.8091	-2.8091	-2.8091	-2.8091	-0.857667	-2.8091	-2.8091	-2.8091	-0.401497	0.0317522	-2.8091	-2.8091	0.563112	-2.8091	-2.8091
rno-piR-11734	-2.8091	-2.8091	-2.8091	-2.8091	-2.8091	-2.8091	-2.8091	-2.8091	-2.8091	-2.8091	-2.8091	-2.8091	-2.8091	-2.8091	-2.8091	-2.8091	-0.912094	-2.8091	-2.8091	-2.8091	-2.8091	-2.8091	-2.8091	-2.8091
rno-piR-11735	1.34239	-0.246323	1.59878	2.50836	1.30869	-0.403412	3.25166	1.51844	-2.8091	3.88383	-2.8091	-2.8091	5.43416	1.85471	-2.8091	0.370133	1.88445	1.18319	2.48009	4.95566	-2.8091	4.67851	-2.8091	-2.8091
rno-piR-11736	0.228153	-2.8091	-1.37586	-0.153685	-0.00243066	-2.8091	-2.8091	-2.8091	-2.8091	-2.8091	-2.8091	-2.8091	-2.8091	-0.203124	-2.8091	-2.8091	-2.8091	-2.8091	-2.8091	-2.8091	-2.8091	-2.8091	-2.8091	-2.8091
rno-piR-11738	-2.8091	-0.640445	-1.62376	-0.153685	-0.00243066	-2.8091	-2.8091	-2.8091	-2.8091	-2.8091	-2.8091	-2.8091	-2.8091	-2.8091	-2.8091	-2.8091	-2.8091	-2.8091	0.0317522	-2.8091	-2.8091	2.91032	-2.8091	4.44204
rno-piR-11739	-0.497571	-2.8091	-2.8091	-2.8091	-2.8091	-2.8091	-2.8091	-2.8091	-2.8091	0.469226	-2.8091	-2.8091	-2.8091	-2.8091	-2.8091	-2.8091	-2.8091	-2.8091	-2.8091	-2.8091	-2.8091	-2.8091	-2.8091	-2.8091
rno-piR-1174	-2.8091	-2.8091	-1.62376	-2.8091	-0.691621	-2.8091	-2.8091	-2.8091	-2.8091	-2.8091	-2.8091	-2.8091	-2.8091	-2.8091	-2.8091	-2.8091	-2.8091	0.340829	-2.8091	-2.8091	-2.8091	-2.8091	-2.8091	-2.8091
rno-piR-11740	-2.8091	-2.8091	-1.37586	-2.8091	-2.8091	-2.8091	-2.8091	-2.8091	-2.8091	-2.8091	-2.8091	3.95503	-2.8091	-2.8091	-2.8091	-2.8091	-0.912094	-2.8091	-2.8091	-2.8091	-2.8091	-2.8091	-2.8091	-2.8091
rno-piR-11742	-2.8091	-2.8091	-2.8091	-2.8091	-2.8091	-2.8091	-2.8091	-2.8091	-2.8091	-2.8091	-2.8091	-2.8091	-2.8091	-2.8091	-2.8091	-2.8091	-0.912094	-2.8091	-2.8091	-2.8091	-2.8091	-2.8091	-2.8091	-2.8091
rno-piR-11743	-0.497571	-1.21021	-1.62376	-0.817012	-0.691621	-2.8091	-2.8091	-2.8091	-2.8091	-2.8091	-2.8091	-2.8091	-2.8091	-2.8091	-2.8091	-2.8091	-2.8091	-2.8091	-2.8091	-2.8091	-2.8091	-2.8091	-2.8091	-2.8091
rno-piR-11744	-2.8091	-2.8091	-1.9595	-2.8091	-2.8091	-2.8091	-2.8091	-2.8091	-2.8091	-2.8091	-2.8091	-2.8091	-2.8091	-2.8091	-2.8091	-2.8091	-0.912094	-2.8091	-2.8091	-2.8091	-2.8091	-2.8091	-2.8091	-2.8091
rno-piR-11745	0.228153	-1.21021	-1.17414	-2.8091	-0.691621	0.821078	-2.8091	-2.8091	-2.8091	-2.8091	3.83307	-2.8091	-2.8091	-2.8091	-2.8091	-2.8091	-2.8091	-2.8091	0.0317522	-2.8091	-2.8091	-2.8091	4.78252	-2.8091
rno-piR-11746	-2.8091	-2.8091	-0.284903	-2.8091	-2.8091	-2.8091	-2.8091	-2.8091	-2.8091	-2.8091	-2.8091	-2.8091	-2.8091	-2.8091	-2.8091	-2.8091	-2.8091	-2.8091	-2.8091	-2.8091	-2.8091	-2.8091	-2.8091	-2.8091
rno-piR-11748	-0.497571	-1.21021	-0.594968	-2.8091	0.454729	-0.403412	-2.8091	-2.8091	-2.8091	3.01414	-2.8091	-2.8091	-2.8091	-0.203124	-2.8091	4.05744	-2.8091	-2.8091	0.838007	-2.8091	-2.8091	4.37741	-2.8091	3.09317
rno-piR-11749	1.7829	-2.8091	-0.195589	-2.8091	-0.00243066	1.70704	2.94032	2.05668	-2.8091	3.51357	2.46457	6.97603	-2.8091	-2.8091	-2.8091	2.12834	-0.269622	-2.8091	1.34924	3.34571	-2.8091	2.91032	-2.8091	-2.8091
rno-piR-1175	-2.8091	-2.8091	-1.9595	-2.8091	-2.8091	-2.8091	-2.8091	-2.8091	-2.8091	-2.8091	-2.8091	-2.8091	-2.8091	-2.8091	-2.8091	-2.8091	-2.8091	-2.8091	-2.8091	-2.8091	-2.8091	-2.8091	-2.8091	-2.8091
rno-piR-11751	-2.8091	-2.8091	-1.9595	-0.817012	-2.8091	-2.8091	-2.8091	-2.8091	-2.8091	-2.8091	-2.8091	-2.8091	-2.8091	-2.8091	-2.8091	-2.8091	-2.8091	-2.8091	-2.8091	-2.8091	-2.8091	-2.8091	-2.8091	-2.8091
rno-piR-11752	-2.8091	-0.640445	-1.62376	0.290504	-0.691621	-0.403412	-2.8091	-2.8091	-2.8091	-2.8091	-2.8091	-2.8091	-2.8091	-2.8091	-2.8091	-2.8091	-0.912094	-2.8091	0.838007	-2.8091	-2.8091	-2.8091	-2.8091	-2.8091
rno-piR-11753	-2.8091	-2.8091	-2.8091	-2.8091	-2.8091	-2.8091	-2.8091	-2.8091	-2.8091	-2.8091	-2.8091	-2.8091	-2.8091	-2.8091	-2.8091	-2.8091	-0.912094	-0.401497	-2.8091	-2.8091	-2.8091	-2.8091	-2.8091	-2.8091
rno-piR-11754	-2.8091	-2.8091	-1.00219	-0.817012	-0.691621	-2.8091	-2.8091	-2.8091	-2.8091	-2.8091	-2.8091	-2.8091	-2.8091	-2.8091	-2.8091	-2.8091	-0.912094	-2.8091	-2.8091	-2.8091	-2.8091	-2.8091	-2.8091	-2.8091
rno-piR-11755	-2.8091	-2.8091	-0.851482	-2.8091	-2.8091	-2.8091	-2.8091	-2.8091	-2.8091	-2.8091	-2.8091	-2.8091	-2.8091	-2.8091	-2.8091	-2.8091	-2.8091	-2.8091	-2.8091	-2.8091	-2.8091	-2.8091	-2.8091	-2.8091
rno-piR-11756	-2.8091	-2.8091	-1.62376	-2.8091	-2.8091	-2.8091	-2.8091	-2.8091	-2.8091	-0.291042	-2.8091	-2.8091	-2.8091	-2.8091	-2.8091	-2.8091	-2.8091	-2.8091	-2.8091	-2.8091	-2.8091	-2.8091	-2.8091	-2.8091
rno-piR-11757	-2.8091	-1.21021	-0.483425	-0.817012	-0.00243066	-0.403412	-2.8091	-2.8091	-2.8091	0.469226	-2.8091	-2.8091	-2.8091	-0.203124	-2.8091	-2.8091	-0.912094	-0.401497	-2.8091	-2.8091	-2.8091	-2.8091	-2.8091	-2.8091
rno-piR-11761	0.702996	1.91491	2.28241	4.29934	1.98073	1.70704	3.50757	2.44751	-2.8091	0.960112	1.01527	4.53119	-2.8091	2.27252	-2.8091	0.370133	2.18467	2.25352	2.26962	4.11309	9.30244	3.4772	-2.8091	-2.8091
rno-piR-11765	-2.8091	-2.8091	-2.8091	-2.8091	-2.8091	-2.8091	-2.8091	-2.8091	-2.8091	-2.8091	-2.8091	-2.8091	-2.8091	-2.8091	-2.8091	2.43186	-2.8091	-2.8091	-2.8091	-2.8091	-2.8091	-2.8091	-2.8091	-2.8091
rno-piR-11766	-2.8091	0.520875	0.36532	0.290504	0.454729	1.70704	-2.8091	-2.8091	-2.8091	0.469226	1.9153	-2.8091	-2.8091	-0.857667	-2.8091	-2.8091	0.493989	0.340829	2.02303	-2.8091	-2.8091	0.563112	-2.8091	-2.8091
rno-piR-11767	-2.8091	-2.8091	-1.9595	-2.8091	-2.8091	-2.8091	-2.8091	-2.8091	-2.8091	-2.8091	-2.8091	-2.8091	-2.8091	-2.8091	4.41621	-2.8091	-2.8091	-2.8091	-2.8091	-2.8091	-2.8091	-2.8091	-2.8091	-2.8091
rno-piR-11768	-2.8091	-2.8091	-2.8091	-2.8091	-2.8091	-2.8091	-2.8091	-2.8091	-2.8091	-2.8091	1.01527	-2.8091	-2.8091	-2.8091	-2.8091	-2.8091	-2.8091	-2.8091	-2.8091	-2.8091	-2.8091	-2.8091	-2.8091	-2.8091
rno-piR-11769	-2.8091	-2.8091	-1.17414	-0.817012	-2.8091	-2.8091	-2.8091	-2.8091	-2.8091	-2.8091	-2.8091	-2.8091	-2.8091	0.236575	3.43517	-2.8091	0.163835	-2.8091	0.838007	-2.8091	-2.8091	-2.8091	-2.8091	-2.8091
rno-piR-1177	-2.8091	-2.8091	-1.17414	-0.817012	-2.8091	-2.8091	-2.8091	-2.8091	-2.8091	1.61494	-2.8091	-2.8091	-2.8091	-2.8091	-2.8091	-2.8091	0.163835	-2.8091	0.0317522	-2.8091	-2.8091	-2.8091	-2.8091	-2.8091
rno-piR-11772	-2.8091	-2.8091	-1.9595	-2.8091	-2.8091	-2.8091	-2.8091	-2.8091	-2.8091	-2.8091	-2.8091	-2.8091	-2.8091	-2.8091	-2.8091	-2.8091	-2.8091	-2.8091	-2.8091	-2.8091	-2.8091	-2.8091	-2.8091	-2.8091
rno-piR-11773	-2.8091	-2.8091	-1.17414	-2.8091	-2.8091	-2.8091	-2.8091	-2.8091	-2.8091	-0.291042	-2.8091	-2.8091	-2.8091	-2.8091	-2.8091	-2.8091	-0.912094	0.340829	0.0317522	-2.8091	-2.8091	0.563112	-2.8091	-2.8091
rno-piR-11774	-2.8091	-2.8091	-1.00219	-2.8091	-2.8091	-2.8091	4.08054	-2.8091	-2.8091	-2.8091	-2.8091	-2.8091	-2.8091	-2.8091	-2.8091	-2.8091	-2.8091	-2.8091	-2.8091	-2.8091	-2.8091	1.42735	1.88149	-2.8091
rno-piR-11776	-2.8091	-2.8091	-1.9595	-0.817012	-0.691621	-2.8091	-2.8091	-2.8091	-2.8091	-2.8091	-2.8091	-2.8091	-2.8091	-2.8091	-2.8091	-2.8091	-2.8091	-0.401497	0.0317522	-2.8091	-2.8091	-2.8091	-2.8091	-2.8091
rno-piR-11777	-2.8091	-0.640445	-1.62376	-2.8091	-2.8091	-2.8091	-2.8091	1.51844	-2.8091	-2.8091	-2.8091	-2.8091	-2.8091	-0.857667	-2.8091	-2.8091	-2.8091	-2.8091	-2.8091	-2.8091	-2.8091	-2.8091	-2.8091	-2.8091
rno-piR-11778	-2.8091	-1.21021	-2.8091	-2.8091	-2.8091	-2.8091	-2.8091	-2.8091	-2.8091	-2.8091	-2.8091	-2.8091	-2.8091	-2.8091	-2.8091	-2.8091	-2.8091	-2.8091	-2.8091	-2.8091	-2.8091	-2.8091	-2.8091	-2.8091
rno-piR-11779	0.702996	-0.246323	-0.380507	-2.8091	0.454729	-2.8091	2.54268	-2.8091	-2.8091	1.85633	-2.8091	-2.8091	-2.8091	-0.857667	-2.8091	-2.8091	-0.269622	-2.8091	0.838007	1.5964	-2.8091	-2.8091	-2.8091	-2.8091
rno-piR-1178	-2.8091	-2.8091	-2.8091	-2.8091	-2.8091	-2.8091	-2.8091	-2.8091	-2.8091	-2.8091	-2.8091	2.98098	-2.8091	-2.8091	-2.8091	-2.8091	-2.8091	-2.8091	-2.8091	-2.8091	-2.8091	-2.8091	-2.8091	-2.8091
rno-piR-11781	-2.8091	-2.8091	-2.8091	-2.8091	-2.8091	0.338593	-2.8091	-2.8091	-2.8091	-2.8091	-2.8091	-2.8091	-2.8091	-2.8091	-2.8091	-2.8091	-2.8091	-0.401497	-2.8091	-2.8091	-2.8091	-2.8091	-2.8091	-2.8091
rno-piR-11782	1.05817	-2.8091	-2.8091	-2.8091	-2.8091	-0.403412	-2.8091	-2.8091	-2.8091	-2.8091	-2.8091	-2.8091	-2.8091	-0.857667	-2.8091	-2.8091	-2.8091	-2.8091	-2.8091	-2.8091	-2.8091	-2.8091	-2.8091	-2.8091
rno-piR-11786	-2.8091	-2.8091	-2.8091	-2.8091	-2.8091	-2.8091	-2.8091	-2.8091	-2.8091	-2.8091	1.01527	-2.8091	-2.8091	-0.857667	-2.8091	-2.8091	-2.8091	-2.8091	-2.8091	-2.8091	-2.8091	-2.8091	-2.8091	-2.8091
rno-piR-11788	-2.8091	-1.21021	-0.851482	0.290504	-2.8091	-0.403412	-2.8091	-2.8091	-2.8091	-2.8091	-2.8091	-2.8091	-2.8091	-2.8091	-2.8091	-2.8091	-0.912094	-2.8091	-2.8091	-2.8091	-2.8091	-2.8091	-2.8091	-2.8091
rno-piR-11789	-2.8091	-2.8091	-1.00219	-2.8091	-0.691621	-0.403412	-2.8091	-2.8091	-2.8091	-2.8091	-2.8091	-2.8091	-2.8091	-2.8091	3.43517	-2.8091	-2.8091	0.340829	0.0317522	-2.8091	-2.8091	-2.8091	-2.8091	-2.8091
rno-piR-11790	-2.8091	-1.21021	-1.9595	-2.8091	-2.8091	-2.8091	-2.8091	-2.8091	-2.8091	-2.8091	-2.8091	-2.8091	-2.8091	-2.8091	-2.8091	-2.8091	-2.8091	-2.8091	0.838007	-2.8091	-2.8091	-2.8091	-2.8091	-2.8091
rno-piR-11791	3.07263	-2.8091	-1.62376	-0.817012	-2.8091	2.0914	-2.8091	1.51844	-2.8091	-0.291042	-2.8091	-2.8091	-2.8091	1.06754	-2.8091	-2.8091	-0.912094	-2.8091	0.838007	-2.8091	-2.8091	-2.8091	2.82617	-2.8091
rno-piR-11792	4.08713	4.39479	4.83031	5.88597	4.40495	4.26259	3.50757	2.44751	-2.8091	3.88383	3.42752	3.54872	-2.8091	4.13555	-2.8091	3.24624	4.04373	4.50597	5.1333	6.49712	-2.8091	4.19945	-2.8091	2.78304
rno-piR-11795	-2.8091	-2.8091	-1.62376	-2.8091	-0.691621	-2.8091	-2.8091	-2.8091	-2.8091	0.469226	-2.8091	-2.8091	-2.8091	-2.8091	-2.8091	-2.8091	-2.8091	-2.8091	-2.8091	-2.8091	-2.8091	-2.8091	-2.8091	-2.8091
rno-piR-11797	-2.8091	-2.8091	-1.62376	-2.8091	-2.8091	-2.8091	-2.8091	-2.8091	-2.8091	-2.8091	-2.8091	-2.8091	-2.8091	0.236575	-2.8091	-2.8091	-2.8091	-2.8091	-2.8091	-2.8091	-2.8091	-2.8091	-2.8091	-2.8091
rno-piR-11798	-2.8091	-2.8091	-1.37586	-0.817012	-0.691621	-2.8091	-2.8091	-2.8091	-2.8091	-2.8091	-2.8091	-2.8091	-2.8091	-0.203124	-2.8091	-2.8091	-2.8091	-2.8091	-2.8091	-2.8091	-2.8091	-2.8091	-2.8091	-2.8091
rno-piR-11799	-2.8091	-2.8091	-1.9595	-2.8091	-2.8091	-2.8091	-2.8091	-2.8091	-2.8091	-2.8091	-2.8091	-2.8091	-2.8091	-2.8091	-2.8091	-2.8091	-2.8091	-2.8091	-2.8091	-2.8091	-2.8091	-2.8091	-2.8091	-2.8091
rno-piR-118	-2.8091	-2.8091	-1.62376	-2.8091	-0.691621	-2.8091	-2.8091	-2.8091	-2.8091	-2.8091	-2.8091	-2.8091	-2.8091	-2.8091	-2.8091	-2.8091	-2.8091	-2.8091	1.34924	-2.8091	-2.8091	-2.8091	-2.8091	-2.8091
rno-piR-1180	-2.8091	-2.8091	-1.00219	-0.817012	-2.8091	-0.403412	-2.8091	-2.8091	-2.8091	-2.8091	1.9153	-2.8091	-2.8091	-0.203124	-2.8091	-2.8091	-2.8091	-2.8091	0.0317522	0.45269	-2.8091	-2.8091	-2.8091	-2.8091
rno-piR-11801	-2.8091	-2.8091	-1.62376	-2.8091	-2.8091	-2.8091	-2.8091	-2.8091	-2.8091	-2.8091	-2.8091	-2.8091	-2.8091	-2.8091	-2.8091	-2.8091	-2.8091	-2.8091	-2.8091	-2.8091	-2.8091	-2.8091	-2.8091	-2.8091
rno-piR-11802	-2.8091	-2.8091	-1.9595	-2.8091	-2.8091	-2.8091	-2.8091	-2.8091	-2.8091	-2.8091	-2.8091	-2.8091	-2.8091	-2.8091	-2.8091	-2.8091	-2.8091	-2.8091	-2.8091	-2.8091	-2.8091	-2.8091	-2.8091	-2.8091
rno-piR-11803	-2.8091	-2.8091	-2.8091	-0.817012	-2.8091	-2.8091	-2.8091	-2.8091	-2.8091	-2.8091	-2.8091	-2.8091	-2.8091	-2.8091	-2.8091	-2.8091	-2.8091	-2.8091	-2.8091	3.49372	-2.8091	-2.8091	-2.8091	-2.8091
rno-piR-11804	-0.497571	0.0587823	-1.00219	1.79104	-0.691621	1.46788	-2.8091	0.646749	-2.8091	-0.291042	-2.8091	-2.8091	-2.8091	0.570591	-2.8091	0.370133	-0.269622	-0.401497	0.838007	4.67473	-2.8091	3.76005	3.39198	-2.8091
rno-piR-11805	-2.8091	-2.8091	-2.8091	-2.8091	-0.691621	-2.8091	-2.8091	-2.8091	-2.8091	-2.8091	-2.8091	-2.8091	-2.8091	-2.8091	-2.8091	-2.8091	-2.8091	-2.8091	-2.8091	-2.8091	-2.8091	-2.8091	-2.8091	-2.8091
rno-piR-11806	-2.8091	-2.8091	-1.9595	-2.8091	-2.8091	-2.8091	-2.8091	-2.8091	2.2881	-0.291042	3.6445	-2.8091	-2.8091	-2.8091	3.43517	-2.8091	-2.8091	-2.8091	0.0317522	-2.8091	-2.8091	-2.8091	-2.8091	-2.8091
rno-piR-11807	-2.8091	-2.8091	-2.8091	-2.8091	-2.8091	-2.8091	-2.8091	-2.8091	-2.8091	-2.8091	-2.8091	-2.8091	-2.8091	-2.8091	-2.8091	-2.8091	-2.8091	-0.401497	-2.8091	-2.8091	-2.8091	-2.8091	-2.8091	-2.8091
rno-piR-11808	-2.8091	-2.8091	-1.37586	-2.8091	-0.691621	-2.8091	-2.8091	-2.8091	-2.8091	-2.8091	-2.8091	-2.8091	-2.8091	-0.857667	-2.8091	-2.8091	-2.8091	-2.8091	-2.8091	-2.8091	-2.8091	-2.8091	-2.8091	-2.8091
rno-piR-11809	0.702996	-2.8091	-2.8091	-2.8091	-2.8091	0.338593	-2.8091	-2.8091	-2.8091	0.469226	-2.8091	-2.8091	-2.8091	-2.8091	-2.8091	-2.8091	-2.8091	-0.401497	-2.8091	-2.8091	-2.8091	-2.8091	-2.8091	-2.8091
rno-piR-1181	-2.8091	-2.8091	-0.284903	0.290504	-0.00243066	-2.8091	-2.8091	-2.8091	4.5422	-2.8091	-2.8091	-2.8091	-2.8091	0.236575	-2.8091	-2.8091	-0.912094	-0.401497	-2.8091	-2.8091	-2.8091	-2.8091	-2.8091	-2.8091
rno-piR-11810	-2.8091	-2.8091	-0.380507	-2.8091	-2.8091	-2.8091	-2.8091	-2.8091	-2.8091	0.469226	-2.8091	-2.8091	-2.8091	-0.857667	-2.8091	-2.8091	0.493989	-2.8091	-2.8091	-2.8091	-2.8091	-2.8091	-2.8091	-2.8091
rno-piR-11813	0.702996	-1.21021	-1.62376	-2.8091	-2.8091	-2.8091	-2.8091	-2.8091	-2.8091	-2.8091	-2.8091	-2.8091	-2.8091	-2.8091	-2.8091	-2.8091	-2.8091	-2.8091	0.0317522	-2.8091	-2.8091	-2.8091	-2.8091	-2.8091
rno-piR-11814	-2.8091	-0.640445	0.476328	-2.8091	-2.8091	-2.8091	-2.8091	-2.8091	-2.8091	-0.291042	-2.8091	-2.8091	-2.8091	0.236575	-2.8091	-2.8091	-0.269622	-2.8091	-2.8091	-2.8091	-2.8091	-2.8091	-2.8091	-2.8091
rno-piR-11815	-2.8091	-2.8091	-1.37586	-2.8091	-0.691621	-0.403412	-2.8091	2.44751	-2.8091	-2.8091	-2.8091	-2.8091	-2.8091	-2.8091	-2.8091	-2.8091	-2.8091	-2.8091	0.0317522	-2.8091	-2.8091	-2.8091	-2.8091	-2.8091
rno-piR-11816	-2.8091	-2.8091	-0.851482	-2.8091	-2.8091	-0.403412	-2.8091	-2.8091	-2.8091	-2.8091	-2.8091	-2.8091	-2.8091	-2.8091	-2.8091	1.74324	-2.8091	-2.8091	0.0317522	-2.8091	-2.8091	-2.8091	-2.8091	-2.8091
rno-piR-1182	-0.497571	-2.8091	-2.8091	-2.8091	-2.8091	-2.8091	-2.8091	-2.8091	-2.8091	-2.8091	-2.8091	-2.8091	-2.8091	-2.8091	-2.8091	-2.8091	-2.8091	-2.8091	-2.8091	-2.8091	-2.8091	-2.8091	-2.8091	-2.8091
rno-piR-11821	-2.8091	-2.8091	-1.17414	-2.8091	-0.691621	-2.8091	-2.8091	0.646749	-2.8091	-2.8091	-2.8091	-2.8091	-2.8091	-2.8091	-2.8091	-2.8091	-2.8091	-2.8091	-2.8091	-2.8091	-2.8091	-2.8091	-2.8091	-2.8091
rno-piR-11823	-2.8091	-2.8091	-1.62376	-2.8091	-2.8091	-2.8091	-2.8091	-2.8091	-2.8091	-2.8091	-2.8091	-2.8091	-2.8091	-2.8091	-2.8091	-2.8091	-2.8091	-2.8091	-2.8091	-2.8091	-2.8091	2.35186	-2.8091	-2.8091
rno-piR-11824	0.228153	-2.8091	-1.37586	-0.153685	-0.691621	-2.8091	-2.8091	-2.8091	-2.8091	-2.8091	-2.8091	-2.8091	-2.8091	-2.8091	-2.8091	-2.8091	-2.8091	-0.401497	-2.8091	3.42161	-2.8091	-2.8091	-2.8091	-2.8091
rno-piR-11825	-2.8091	-2.8091	-1.9595	-2.8091	-2.8091	-2.8091	-2.8091	-2.8091	-2.8091	-2.8091	-2.8091	-2.8091	-2.8091	-2.8091	-2.8091	-2.8091	-2.8091	-2.8091	-2.8091	-2.8091	-2.8091	-2.8091	-2.8091	-2.8091
rno-piR-11827	-2.8091	-2.8091	-1.62376	-2.8091	-2.8091	-2.8091	-2.8091	-2.8091	-2.8091	-2.8091	-2.8091	-2.8091	-2.8091	-2.8091	-2.8091	-2.8091	-2.8091	-2.8091	-2.8091	-2.8091	-2.8091	-2.8091	-2.8091	-2.8091
rno-piR-11828	0.228153	-1.21021	-0.716865	-2.8091	0.454729	-0.403412	1.99161	-2.8091	-2.8091	1.85633	-2.8091	-2.8091	-2.8091	-2.8091	-2.8091	0.370133	0.493989	0.340829	-2.8091	-2.8091	-2.8091	0.563112	-2.8091	-2.8091
rno-piR-11829	-2.8091	-2.8091	-2.8091	-2.8091	-2.8091	-2.8091	-2.8091	-2.8091	-2.8091	0.469226	-2.8091	-2.8091	-2.8091	-2.8091	-2.8091	-2.8091	-2.8091	-2.8091	-2.8091	-2.8091	-2.8091	-2.8091	-2.8091	-2.8091
rno-piR-1183	-2.8091	-1.21021	-0.195589	2.24327	-0.00243066	-0.403412	3.25166	0.646749	-2.8091	0.960112	1.9153	-2.8091	-2.8091	0.236575	-2.8091	-2.8091	-2.8091	0.340829	2.02303	4.24427	-2.8091	4.19945	-2.8091	-2.8091
rno-piR-11831	-0.497571	-1.21021	-1.37586	-2.8091	-2.8091	0.338593	2.94032	-2.8091	-2.8091	-0.291042	-2.8091	-2.8091	-2.8091	-2.8091	-2.8091	-2.8091	-2.8091	-0.401497	1.34924	4.9299	-2.8091	-2.8091	-2.8091	-2.8091
rno-piR-11835	-2.8091	-2.8091	-1.9595	-2.8091	-2.8091	-2.8091	-2.8091	-2.8091	-2.8091	-2.8091	-2.8091	-2.8091	-2.8091	-0.857667	-2.8091	-2.8091	-2.8091	-2.8091	-2.8091	-2.8091	-2.8091	-2.8091	-2.8091	-2.8091
rno-piR-11836	-2.8091	-2.8091	-1.17414	-2.8091	-0.691621	-2.8091	-2.8091	-2.8091	-2.8091	-2.8091	-2.8091	-2.8091	-2.8091	-2.8091	-2.8091	-2.8091	-2.8091	-0.401497	-2.8091	-2.8091	-2.8091	-2.8091	-2.8091	-2.8091
rno-piR-11837	-2.8091	-2.8091	-1.17414	-2.8091	-2.8091	-2.8091	-2.8091	-2.8091	-2.8091	-2.8091	-2.8091	-2.8091	-2.8091	-2.8091	-2.8091	-2.8091	-2.8091	-2.8091	-2.8091	3.49372	-2.8091	-2.8091	-2.8091	-2.8091
rno-piR-11838	-0.497571	-1.21021	-1.17414	-2.8091	-0.691621	-2.8091	-2.8091	-2.8091	-2.8091	-2.8091	-2.8091	-2.8091	-2.8091	-2.8091	-2.8091	-2.8091	-0.912094	-2.8091	-2.8091	-2.8091	-2.8091	-2.8091	-2.8091	-2.8091
rno-piR-11839	-2.8091	-2.8091	-1.9595	-0.153685	-2.8091	-2.8091	-2.8091	-2.8091	-2.8091	-2.8091	1.01527	-2.8091	-2.8091	-0.857667	-2.8091	-2.8091	-2.8091	-0.401497	0.838007	-2.8091	-2.8091	-2.8091	-2.8091	-2.8091
rno-piR-1184	-2.8091	-0.640445	-2.8091	-0.817012	-0.691621	-2.8091	-2.8091	-2.8091	-2.8091	-2.8091	-2.8091	-2.8091	-2.8091	-2.8091	-2.8091	-2.8091	-2.8091	-2.8091	-2.8091	-2.8091	-2.8091	-2.8091	-2.8091	-2.8091
rno-piR-11841	-2.8091	-2.8091	-1.62376	-2.8091	-2.8091	-0.403412	-2.8091	0.646749	-2.8091	-2.8091	-2.8091	-2.8091	-2.8091	-2.8091	-2.8091	-2.8091	-2.8091	-2.8091	0.0317522	-2.8091	-2.8091	-2.8091	-2.8091	-2.8091
rno-piR-11842	-2.8091	-2.8091	-2.8091	-2.8091	-2.8091	-2.8091	-2.8091	-2.8091	-2.8091	-2.8091	-2.8091	-2.8091	-2.8091	-2.8091	-2.8091	-2.8091	-2.8091	-0.401497	-2.8091	-2.8091	-2.8091	-2.8091	-2.8091	-2.8091
rno-piR-11843	-2.8091	-2.8091	-1.9595	-2.8091	-2.8091	-2.8091	-2.8091	-2.8091	-2.8091	-2.8091	-2.8091	-2.8091	-2.8091	-2.8091	-2.8091	-2.8091	-2.8091	-2.8091	-2.8091	-2.8091	-2.8091	-2.8091	-2.8091	-2.8091
rno-piR-11844	0.228153	-1.21021	0.244802	0.899196	0.454729	0.338593	-2.8091	-2.8091	-2.8091	-2.8091	-2.8091	-2.8091	-2.8091	-0.857667	-2.8091	-2.8091	-0.912094	0.340829	-2.8091	2.99449	-2.8091	-2.8091	-2.8091	-2.8091
rno-piR-11847	-2.8091	-0.640445	0.807944	-0.153685	0.454729	0.338593	-2.8091	-2.8091	-2.8091	2.24363	4.98697	-2.8091	-2.8091	1.06754	-2.8091	-2.8091	0.163835	-2.8091	-2.8091	-2.8091	-2.8091	-2.8091	-2.8091	-2.8091
rno-piR-11848	-2.8091	-2.8091	-1.9595	-2.8091	-2.8091	-2.8091	-2.8091	-2.8091	-2.8091	-2.8091	-2.8091	-2.8091	-2.8091	-2.8091	-2.8091	-2.8091	-2.8091	-2.8091	-2.8091	-2.8091	-2.8091	-2.8091	-2.8091	-2.8091
rno-piR-11849	-0.497571	-2.8091	-0.594968	-0.817012	-2.8091	-2.8091	1.99161	-2.8091	-2.8091	0.469226	-2.8091	-2.8091	-2.8091	-2.8091	-2.8091	-2.8091	-0.269622	-2.8091	-2.8091	-2.8091	-2.8091	-2.8091	-2.8091	-2.8091
rno-piR-11850	-2.8091	-2.8091	-1.00219	-2.8091	-2.8091	-2.8091	-2.8091	-2.8091	-2.8091	-2.8091	-2.8091	-2.8091	-2.8091	-2.8091	-2.8091	-2.8091	-0.912094	-2.8091	-2.8091	-2.8091	-2.8091	-2.8091	-2.8091	-2.8091
rno-piR-11851	1.57947	-2.8091	-0.483425	-0.153685	-0.00243066	0.338593	-2.8091	-2.8091	-2.8091	-0.291042	-2.8091	-2.8091	-2.8091	-2.8091	-2.8091	-2.8091	-0.912094	-2.8091	0.0317522	-0.305325	-2.8091	-2.8091	-2.8091	-2.8091
rno-piR-11852	-2.8091	-2.8091	-0.483425	-2.8091	-0.00243066	-0.403412	1.99161	-2.8091	-2.8091	-2.8091	-2.8091	-2.8091	-2.8091	-0.857667	-2.8091	-2.8091	-2.8091	-0.401497	-2.8091	-2.8091	-2.8091	-2.8091	-2.8091	-2.8091
rno-piR-11853	-2.8091	-2.8091	-2.8091	-2.8091	-0.691621	-2.8091	-2.8091	-2.8091	-2.8091	-2.8091	-2.8091	-2.8091	-2.8091	-0.857667	-2.8091	-2.8091	-2.8091	-2.8091	-2.8091	-2.8091	-2.8091	-2.8091	-2.8091	-2.8091
rno-piR-11854	-2.8091	-2.8091	-1.9595	-2.8091	-0.691621	-2.8091	-2.8091	-2.8091	-2.8091	-2.8091	-2.8091	-2.8091	-2.8091	-2.8091	-2.8091	-2.8091	-2.8091	-2.8091	-2.8091	-2.8091	-2.8091	-2.8091	-2.8091	-2.8091
rno-piR-11855	-0.497571	0.868485	1.88447	1.79104	1.68365	0.821078	3.25166	-2.8091	-2.8091	-2.8091	1.9153	5.5223	-2.8091	1.43551	-2.8091	-2.8091	2.18467	2.39711	2.6637	3.42161	-2.8091	3.62555	-2.8091	-2.8091
rno-piR-11856	-2.8091	-2.8091	-1.37586	-2.8091	-2.8091	0.338593	-2.8091	-2.8091	-2.8091	-2.8091	-2.8091	-2.8091	-2.8091	-2.8091	-2.8091	-2.8091	-0.912094	-2.8091	-2.8091	-2.8091	-2.8091	-2.8091	-2.8091	-2.8091
rno-piR-11857	-2.8091	-2.8091	-2.8091	-2.8091	-2.8091	-2.8091	-2.8091	-2.8091	-2.8091	-2.8091	-2.8091	-2.8091	-2.8091	-2.8091	-2.8091	-2.8091	-0.912094	-2.8091	-2.8091	-2.8091	-2.8091	1.42735	-2.8091	-2.8091
rno-piR-11858	-2.8091	-0.640445	-0.716865	-0.153685	-2.8091	-2.8091	-2.8091	-2.8091	-2.8091	-2.8091	-2.8091	-2.8091	-2.8091	-2.8091	-2.8091	-2.8091	0.493989	0.340829	0.838007	-2.8091	-2.8091	-2.8091	-2.8091	-2.8091
rno-piR-11859	-2.8091	-2.8091	-1.62376	-2.8091	-2.8091	0.338593	-2.8091	-2.8091	-2.8091	0.960112	3.42752	-2.8091	-2.8091	-0.857667	-2.8091	-2.8091	-0.912094	-2.8091	-2.8091	-2.8091	-2.8091	-2.8091	-2.8091	-2.8091
rno-piR-1186	-2.8091	-2.8091	-2.8091	-2.8091	-2.8091	-2.8091	-2.8091	-2.8091	-2.8091	-2.8091	-2.8091	2.03091	-2.8091	-2.8091	-2.8091	-2.8091	-2.8091	-2.8091	-2.8091	-2.8091	-2.8091	-2.8091	-2.8091	-2.8091
rno-piR-11860	-0.497571	-2.8091	-1.17414	-2.8091	-2.8091	-2.8091	-2.8091	-2.8091	-2.8091	-2.8091	-2.8091	-2.8091	-2.8091	-2.8091	-2.8091	-2.8091	-2.8091	-2.8091	-2.8091	-2.8091	-2.8091	-2.8091	-2.8091	-2.8091
rno-piR-11862	0.228153	-2.8091	-0.0327353	-2.8091	0.454729	-2.8091	-2.8091	-2.8091	-2.8091	-2.8091	-2.8091	4.53119	-2.8091	-0.857667	-2.8091	-2.8091	-0.269622	-2.8091	-2.8091	3.62793	-2.8091	0.563112	-2.8091	4.44204
rno-piR-11863	-2.8091	-2.8091	-1.62376	-2.8091	-2.8091	-2.8091	-2.8091	-2.8091	-2.8091	-0.291042	-2.8091	-2.8091	-2.8091	-2.8091	-2.8091	-2.8091	-2.8091	-2.8091	-2.8091	-2.8091	-2.8091	-2.8091	-2.8091	-2.8091
rno-piR-11865	-2.8091	-0.640445	-1.9595	-2.8091	-2.8091	-2.8091	-2.8091	-2.8091	-2.8091	1.61494	-2.8091	-2.8091	-2.8091	-2.8091	-2.8091	-2.8091	-2.8091	-0.401497	-2.8091	-2.8091	-2.8091	2.35186	-2.8091	-2.8091
rno-piR-11866	-2.8091	-2.8091	-1.9595	-2.8091	-2.8091	-0.403412	-2.8091	-2.8091	-2.8091	-2.8091	-2.8091	-2.8091	-2.8091	-2.8091	-2.8091	-2.8091	-2.8091	-2.8091	-2.8091	-2.8091	-2.8091	-2.8091	-2.8091	-2.8091
rno-piR-11867	0.228153	-2.8091	-1.62376	-2.8091	-2.8091	-2.8091	-2.8091	-2.8091	-2.8091	-2.8091	-2.8091	-2.8091	-2.8091	-2.8091	-2.8091	0.370133	-2.8091	-2.8091	-2.8091	-2.8091	-2.8091	-2.8091	3.39198	-2.8091
rno-piR-11868	1.96108	0.308753	2.32706	1.79104	2.10903	0.338593	-2.8091	-2.8091	-2.8091	-2.8091	-2.8091	-2.8091	-2.8091	1.85471	-2.8091	-2.8091	1.88445	0.823464	0.838007	-2.8091	-2.8091	-2.8091	-2.8091	-2.8091
rno-piR-11870	-2.8091	-2.8091	-2.8091	-2.8091	-2.8091	-2.8091	-2.8091	-2.8091	-2.8091	-2.8091	-2.8091	-2.8091	-2.8091	-2.8091	-2.8091	-2.8091	-0.912094	-2.8091	-2.8091	-2.8091	-2.8091	-2.8091	-2.8091	-2.8091
rno-piR-11872	-2.8091	-2.8091	-1.9595	-2.8091	-0.691621	-0.403412	-2.8091	-2.8091	-2.8091	-2.8091	-2.8091	-2.8091	-2.8091	-2.8091	-2.8091	-2.8091	-2.8091	-2.8091	-2.8091	-2.8091	-2.8091	-2.8091	-2.8091	-2.8091
rno-piR-11874	-2.8091	-2.8091	-1.9595	-2.8091	-2.8091	-2.8091	-2.8091	-2.8091	-2.8091	-2.8091	-2.8091	-2.8091	-2.8091	-2.8091	-2.8091	-2.8091	-2.8091	-2.8091	-2.8091	-2.8091	-2.8091	-2.8091	-2.8091	-2.8091
rno-piR-11875	-2.8091	-2.8091	-2.8091	-2.8091	-2.8091	-2.8091	-2.8091	-2.8091	-2.8091	-2.8091	-2.8091	-2.8091	-2.8091	-2.8091	-2.8091	-2.8091	-2.8091	-2.8091	-2.8091	-2.8091	-2.8091	0.563112	-2.8091	-2.8091
rno-piR-11877	-2.8091	-2.8091	-1.62376	-2.8091	-2.8091	-2.8091	-2.8091	-2.8091	-2.8091	-2.8091	-2.8091	-2.8091	-2.8091	-2.8091	-2.8091	-2.8091	-2.8091	-2.8091	-2.8091	-2.8091	-2.8091	-2.8091	-2.8091	-2.8091
rno-piR-11878	-2.8091	-2.8091	-1.9595	-2.8091	-2.8091	-0.403412	2.94032	0.646749	-2.8091	0.469226	-2.8091	-2.8091	-2.8091	-0.203124	-2.8091	0.370133	-2.8091	-2.8091	-2.8091	3.42161	-2.8091	-2.8091	-2.8091	-2.8091
rno-piR-11879	-2.8091	-2.8091	-1.9595	-2.8091	-2.8091	-2.8091	-2.8091	-2.8091	-2.8091	-2.8091	-2.8091	-2.8091	-2.8091	-2.8091	-2.8091	-2.8091	-2.8091	-2.8091	-2.8091	-2.8091	-2.8091	-2.8091	-2.8091	-2.8091
rno-piR-11880	0.228153	-1.21021	-0.0327353	-2.8091	-2.8091	-2.8091	-2.8091	1.51844	-2.8091	-2.8091	-2.8091	-2.8091	-2.8091	-0.857667	-2.8091	-2.8091	-0.269622	0.340829	-2.8091	-2.8091	-2.8091	-2.8091	-2.8091	-2.8091
rno-piR-11881	-2.8091	-2.8091	-1.9595	-2.8091	-2.8091	-2.8091	-2.8091	-2.8091	-2.8091	-2.8091	-2.8091	-2.8091	-2.8091	-2.8091	-2.8091	-2.8091	-0.912094	-2.8091	-2.8091	-2.8091	-2.8091	-2.8091	-2.8091	-2.8091
rno-piR-11882	-2.8091	-0.640445	-1.9595	-0.153685	0.454729	-2.8091	-2.8091	-2.8091	-2.8091	-0.291042	-2.8091	-2.8091	-2.8091	-2.8091	-2.8091	-2.8091	-0.269622	-2.8091	0.838007	-2.8091	-2.8091	-2.8091	-2.8091	-2.8091
rno-piR-11883	-2.8091	-2.8091	-1.62376	-0.817012	-2.8091	-0.403412	-2.8091	-2.8091	-2.8091	-2.8091	-2.8091	-2.8091	-2.8091	-2.8091	-2.8091	-2.8091	-2.8091	-2.8091	-2.8091	-2.8091	-2.8091	-2.8091	-2.8091	-2.8091
rno-piR-11886	1.05817	0.0587823	-0.111754	-2.8091	0.79938	1.18072	-2.8091	-2.8091	-2.8091	-2.8091	-2.8091	-2.8091	-2.8091	-2.8091	-2.8091	-2.8091	0.986392	0.340829	0.838007	-2.8091	-2.8091	-2.8091	-2.8091	-2.8091
rno-piR-11889	-2.8091	-2.8091	-1.62376	-0.817012	-2.8091	-2.8091	-2.8091	-2.8091	-2.8091	-2.8091	-2.8091	-2.8091	-2.8091	-0.857667	-2.8091	-2.8091	-0.912094	-2.8091	-2.8091	-2.8091	-2.8091	-2.8091	-2.8091	-2.8091
rno-piR-1189	-2.8091	-2.8091	-1.17414	-0.817012	-2.8091	-0.403412	-2.8091	-2.8091	-2.8091	-0.291042	-2.8091	-2.8091	-2.8091	-0.857667	-2.8091	-2.8091	-0.912094	-2.8091	-2.8091	-2.8091	-2.8091	-2.8091	-2.8091	-2.8091
rno-piR-11891	-2.8091	-2.8091	-2.8091	-2.8091	-2.8091	-2.8091	-2.8091	-2.8091	-2.8091	-2.8091	-2.8091	-2.8091	-2.8091	-2.8091	-2.8091	-2.8091	-2.8091	-2.8091	1.34924	3.42161	-2.8091	-2.8091	-2.8091	-2.8091
rno-piR-11892	-2.8091	-2.8091	-1.9595	-2.8091	-2.8091	-2.8091	-2.8091	-2.8091	-2.8091	-2.8091	-2.8091	-2.8091	-2.8091	-2.8091	-2.8091	-2.8091	-2.8091	-2.8091	0.0317522	-2.8091	-2.8091	-2.8091	-2.8091	-2.8091
rno-piR-11893	-0.497571	0.0587823	-0.111754	0.290504	-2.8091	-2.8091	-2.8091	-2.8091	-2.8091	-2.8091	-2.8091	-2.8091	-2.8091	-2.8091	-2.8091	-2.8091	0.7614	0.340829	1.34924	4.06657	-2.8091	-2.8091	-2.8091	-2.8091
rno-piR-11894	-2.8091	-0.640445	1.04127	0.627278	1.30869	-0.403412	-2.8091	-2.8091	-2.8091	1.32461	-2.8091	-2.8091	5.05849	1.06754	-2.8091	-2.8091	1.99163	-0.401497	0.838007	-2.8091	-2.8091	-2.8091	-2.8091	0.944813
rno-piR-11897	-2.8091	-2.8091	-1.37586	-2.8091	-2.8091	-2.8091	-2.8091	-2.8091	-2.8091	-2.8091	-2.8091	-2.8091	-2.8091	-2.8091	-2.8091	-2.8091	-0.912094	-2.8091	-2.8091	-2.8091	-2.8091	-2.8091	-2.8091	-2.8091
rno-piR-11898	-2.8091	-2.8091	-1.9595	-2.8091	-2.8091	-2.8091	-2.8091	-2.8091	-2.8091	-2.8091	-2.8091	-2.8091	-2.8091	-2.8091	-2.8091	-2.8091	-2.8091	-2.8091	-2.8091	-2.8091	-2.8091	0.563112	-2.8091	-2.8091
rno-piR-11899	-2.8091	-2.8091	-0.851482	-2.8091	-2.8091	-2.8091	-2.8091	-2.8091	-2.8091	-2.8091	-2.8091	-2.8091	-2.8091	-2.8091	-2.8091	-2.8091	-2.8091	-2.8091	-2.8091	-2.8091	-2.8091	-2.8091	-2.8091	-2.8091
rno-piR-119	-2.8091	-2.8091	-2.8091	-2.8091	-2.8091	-0.403412	-2.8091	-2.8091	-2.8091	-2.8091	-2.8091	-2.8091	-2.8091	-2.8091	-2.8091	-2.8091	-2.8091	-2.8091	-2.8091	-2.8091	-2.8091	-2.8091	-2.8091	-2.8091
rno-piR-1190	-2.8091	-2.8091	-2.8091	-2.8091	-2.8091	-2.8091	-2.8091	-2.8091	-2.8091	-0.291042	-2.8091	-2.8091	-2.8091	-2.8091	-2.8091	-2.8091	-2.8091	-2.8091	0.0317522	-2.8091	-2.8091	-2.8091	-2.8091	-2.8091
rno-piR-11900	-2.8091	-1.21021	-2.8091	-2.8091	-0.691621	-2.8091	-2.8091	-2.8091	-2.8091	-2.8091	-2.8091	-2.8091	-2.8091	-2.8091	-2.8091	-2.8091	-2.8091	-2.8091	-2.8091	-2.8091	-2.8091	-2.8091	-2.8091	-2.8091
rno-piR-11901	-2.8091	-2.8091	-1.17414	-0.817012	-2.8091	-2.8091	-2.8091	-2.8091	-2.8091	-2.8091	-2.8091	-2.8091	-2.8091	-0.857667	-2.8091	-2.8091	-0.912094	-2.8091	-2.8091	-2.8091	-2.8091	-2.8091	-2.8091	-2.8091
rno-piR-11903	-2.8091	-2.8091	-2.8091	-2.8091	-2.8091	-2.8091	-2.8091	-2.8091	-2.8091	-2.8091	-2.8091	-2.8091	-2.8091	-2.8091	-2.8091	-2.8091	-0.912094	-2.8091	-2.8091	-2.8091	-2.8091	-2.8091	-2.8091	-2.8091
rno-piR-11904	-2.8091	-2.8091	-2.8091	-2.8091	-2.8091	-2.8091	-2.8091	2.75461	-2.8091	-2.8091	-2.8091	-2.8091	-2.8091	-0.857667	-2.8091	-2.8091	-2.8091	-2.8091	-2.8091	-2.8091	-2.8091	-2.8091	-2.8091	-2.8091
rno-piR-11905	-2.8091	-2.8091	-1.9595	-2.8091	-0.691621	-2.8091	-2.8091	-2.8091	-2.8091	-2.8091	-2.8091	-2.8091	-2.8091	-2.8091	-2.8091	-2.8091	-2.8091	-2.8091	-2.8091	-2.8091	-2.8091	-2.8091	-2.8091	-2.8091
rno-piR-11906	-2.8091	-2.8091	-1.37586	-2.8091	-2.8091	-2.8091	-2.8091	-2.8091	-2.8091	-2.8091	-2.8091	-2.8091	-2.8091	-2.8091	-2.8091	-2.8091	-2.8091	-2.8091	-2.8091	-2.8091	-2.8091	-2.8091	-2.8091	-2.8091
rno-piR-11907	-2.8091	-2.8091	-0.851482	-2.8091	-0.691621	-0.403412	-2.8091	-2.8091	-2.8091	-2.8091	-2.8091	-2.8091	-2.8091	-0.203124	-2.8091	-2.8091	-0.912094	0.340829	-2.8091	-2.8091	-2.8091	-2.8091	-2.8091	-2.8091
rno-piR-11909	1.05817	-0.640445	0.476328	-2.8091	-0.691621	-2.8091	-2.8091	-2.8091	-2.8091	-2.8091	-2.8091	-2.8091	-2.8091	-0.857667	-2.8091	-2.8091	-0.912094	-0.401497	-2.8091	-2.8091	-2.8091	-2.8091	-2.8091	-2.8091
rno-piR-11913	-2.8091	-2.8091	-1.17414	-2.8091	-0.691621	-2.8091	-2.8091	-2.8091	-2.8091	-2.8091	-2.8091	-2.8091	-2.8091	-2.8091	-2.8091	-2.8091	-2.8091	-2.8091	-2.8091	-2.8091	-2.8091	-2.8091	-2.8091	-2.8091
rno-piR-11915	0.702996	-1.21021	-1.62376	-0.817012	-0.691621	-2.8091	1.99161	-2.8091	-2.8091	2.24363	1.9153	-2.8091	-2.8091	-2.8091	-2.8091	-2.8091	-0.269622	-2.8091	0.0317522	1.30646	-2.8091	-2.8091	-2.8091	-2.8091
rno-piR-11916	-2.8091	-2.8091	-1.9595	-2.8091	-2.8091	-2.8091	-2.8091	-2.8091	-2.8091	-2.8091	-2.8091	-2.8091	-2.8091	-2.8091	-2.8091	-2.8091	-2.8091	-2.8091	-2.8091	-2.8091	-2.8091	-2.8091	-2.8091	-2.8091
rno-piR-11917	-2.8091	-2.8091	-2.8091	-2.8091	-2.8091	-2.8091	-2.8091	-2.8091	-2.8091	-2.8091	-2.8091	-2.8091	-2.8091	-2.8091	-2.8091	-2.8091	-0.912094	-2.8091	-2.8091	-2.8091	-2.8091	-2.8091	-2.8091	-2.8091
rno-piR-11918	-2.8091	-1.21021	-1.37586	-0.817012	-2.8091	-2.8091	-2.8091	-2.8091	-2.8091	-2.8091	-2.8091	-2.8091	-2.8091	-0.203124	-2.8091	-2.8091	-2.8091	0.340829	0.838007	-2.8091	-2.8091	2.65797	-2.8091	-2.8091
rno-piR-11919	-2.8091	-1.21021	-1.37586	-2.8091	-2.8091	-2.8091	-2.8091	-2.8091	-2.8091	-2.8091	-2.8091	-2.8091	-2.8091	-2.8091	-2.8091	-2.8091	-0.912094	-2.8091	-2.8091	-2.8091	-2.8091	-2.8091	-2.8091	-2.8091
rno-piR-1192	-2.8091	-2.8091	-2.8091	-2.8091	-2.8091	-2.8091	-2.8091	-2.8091	-2.8091	-2.8091	-2.8091	-2.8091	-2.8091	-2.8091	-2.8091	-2.8091	-2.8091	-0.401497	-2.8091	-2.8091	-2.8091	-2.8091	-2.8091	-2.8091
rno-piR-11921	-2.8091	-2.8091	-1.62376	-2.8091	-2.8091	-2.8091	-2.8091	-2.8091	-2.8091	-2.8091	-2.8091	-2.8091	-2.8091	-2.8091	-2.8091	-2.8091	-2.8091	-2.8091	-2.8091	-2.8091	-2.8091	-2.8091	-2.8091	-2.8091
rno-piR-11922	-2.8091	-2.8091	-2.8091	-2.8091	-2.8091	-2.8091	-2.8091	-2.8091	-2.8091	-2.8091	-2.8091	-2.8091	-2.8091	-0.857667	-2.8091	-2.8091	-2.8091	-2.8091	-2.8091	-2.8091	-2.8091	-2.8091	-2.8091	-2.8091
rno-piR-11924	-2.8091	-2.8091	-1.17414	-0.153685	-0.00243066	1.18072	3.91363	1.51844	-2.8091	3.77065	-2.8091	-2.8091	-2.8091	-2.8091	-2.8091	-2.8091	-2.8091	-2.8091	-2.8091	-2.8091	-2.8091	-2.8091	-2.8091	-2.8091
rno-piR-11925	-2.8091	-2.8091	-1.9595	-2.8091	-2.8091	-2.8091	-2.8091	-2.8091	-2.8091	-2.8091	-2.8091	-2.8091	-2.8091	-2.8091	-2.8091	-2.8091	-2.8091	-2.8091	-2.8091	-2.8091	-2.8091	-2.8091	-2.8091	-2.8091
rno-piR-11926	-2.8091	-2.8091	-1.37586	-2.8091	-2.8091	-0.403412	-2.8091	-2.8091	-2.8091	-2.8091	-2.8091	-2.8091	-2.8091	-2.8091	-2.8091	-2.8091	-2.8091	-2.8091	-2.8091	-2.8091	-2.8091	-2.8091	-2.8091	-2.8091
rno-piR-11927	-2.8091	-2.8091	-1.37586	-0.817012	-2.8091	-0.403412	-2.8091	-2.8091	-2.8091	-2.8091	-2.8091	-2.8091	-2.8091	-0.857667	-2.8091	-2.8091	-0.269622	-0.401497	-2.8091	2.04396	-2.8091	-2.8091	-2.8091	-2.8091
rno-piR-11928	-2.8091	-2.8091	-2.8091	-2.8091	-0.691621	-2.8091	-2.8091	-2.8091	-2.8091	-2.8091	-2.8091	-2.8091	-2.8091	-2.8091	-2.8091	-2.8091	-2.8091	-2.8091	-2.8091	-2.8091	-2.8091	-2.8091	-2.8091	-2.8091
rno-piR-11929	-2.8091	-2.8091	-1.9595	-2.8091	-2.8091	-2.8091	-2.8091	-2.8091	-2.8091	-2.8091	-2.8091	-2.8091	-2.8091	0.236575	-2.8091	-2.8091	-2.8091	-2.8091	-2.8091	-2.8091	-2.8091	-2.8091	-2.8091	-2.8091
rno-piR-1193	-2.8091	-1.21021	-1.62376	-2.8091	-2.8091	-2.8091	-2.8091	-2.8091	-2.8091	0.469226	-2.8091	-2.8091	-2.8091	-2.8091	-2.8091	-2.8091	-2.8091	-2.8091	-2.8091	-2.8091	-2.8091	-2.8091	4.11334	-2.8091
rno-piR-11930	-2.8091	-2.8091	-1.37586	-2.8091	-2.8091	-0.403412	-2.8091	0.646749	-2.8091	-2.8091	-2.8091	-2.8091	-2.8091	-2.8091	-2.8091	0.370133	-2.8091	-2.8091	0.0317522	0.942549	-2.8091	-2.8091	-2.8091	-2.8091
rno-piR-11932	-2.8091	-0.640445	-1.62376	-2.8091	-2.8091	-2.8091	-2.8091	-2.8091	-2.8091	-2.8091	-2.8091	-2.8091	-2.8091	-0.857667	-2.8091	-2.8091	-2.8091	-2.8091	-2.8091	-2.8091	-2.8091	-2.8091	-2.8091	-2.8091
rno-piR-11933	-2.8091	-2.8091	-2.8091	-2.8091	-2.8091	-2.8091	-2.8091	-2.8091	-2.8091	0.469226	-2.8091	-2.8091	-2.8091	-2.8091	-2.8091	-2.8091	-2.8091	-2.8091	-2.8091	-2.8091	-2.8091	-2.8091	-2.8091	-2.8091
rno-piR-11934	-2.8091	-2.8091	-1.9595	-2.8091	-2.8091	-2.8091	1.08683	-2.8091	-2.8091	-2.8091	-2.8091	-2.8091	-2.8091	-2.8091	-2.8091	-2.8091	-2.8091	-2.8091	-2.8091	-2.8091	-2.8091	-2.8091	-2.8091	-2.8091
rno-piR-11936	-2.8091	-1.21021	-2.8091	-2.8091	-0.00243066	-2.8091	-2.8091	-2.8091	-2.8091	-0.291042	-2.8091	-2.8091	-2.8091	-0.857667	-2.8091	-2.8091	-0.912094	-2.8091	-2.8091	2.22447	-2.8091	-2.8091	-2.8091	-2.8091
rno-piR-11937	0.702996	-2.8091	0.720831	0.627278	-0.691621	-2.8091	-2.8091	-2.8091	-2.8091	1.32461	4.81866	-2.8091	-2.8091	-0.203124	-2.8091	-2.8091	-0.269622	-0.401497	2.26962	-2.8091	-2.8091	3.62555	-2.8091	-2.8091
rno-piR-11938	-2.8091	-2.8091	-1.37586	-2.8091	-2.8091	-2.8091	-2.8091	2.75461	-2.8091	-2.8091	-2.8091	-2.8091	-2.8091	-2.8091	-2.8091	-2.8091	-2.8091	-2.8091	-2.8091	-2.8091	-2.8091	-2.8091	-2.8091	-2.8091
rno-piR-11939	-2.8091	-2.8091	-1.62376	-2.8091	-2.8091	-2.8091	-2.8091	-2.8091	-2.8091	-2.8091	-2.8091	-2.8091	-2.8091	-2.8091	-2.8091	-2.8091	-0.269622	-2.8091	-2.8091	-2.8091	-2.8091	-2.8091	-2.8091	-2.8091
rno-piR-11940	-2.8091	-2.8091	-2.8091	-0.817012	-2.8091	-2.8091	-2.8091	-2.8091	-2.8091	0.960112	-2.8091	-2.8091	-2.8091	-2.8091	-2.8091	-2.8091	-2.8091	-2.8091	-2.8091	-2.8091	-2.8091	-2.8091	-2.8091	-2.8091
rno-piR-11942	-2.8091	-2.8091	-1.62376	-2.8091	-2.8091	1.18072	-2.8091	-2.8091	-2.8091	-2.8091	3.6445	-2.8091	-2.8091	-2.8091	-2.8091	-2.8091	-2.8091	-2.8091	0.838007	0.45269	-2.8091	-2.8091	-2.8091	-2.8091
rno-piR-11943	-0.497571	-1.21021	-0.284903	-0.153685	-0.691621	-0.403412	1.08683	-2.8091	-2.8091	-2.8091	-2.8091	-2.8091	-2.8091	-0.203124	-2.8091	3.65054	0.493989	0.340829	0.0317522	-2.8091	-2.8091	-2.8091	-2.8091	5.43258
rno-piR-11945	-2.8091	-2.8091	-1.9595	-2.8091	-2.8091	-2.8091	1.08683	-2.8091	-2.8091	-0.291042	-2.8091	6.51782	-2.8091	-2.8091	-2.8091	-2.8091	-2.8091	-2.8091	0.838007	-2.8091	-2.8091	4.5358	-2.8091	-2.8091
rno-piR-11946	-2.8091	-2.8091	-1.00219	-0.817012	-0.00243066	-2.8091	-2.8091	-2.8091	-2.8091	-2.8091	-2.8091	-2.8091	-2.8091	-2.8091	-2.8091	-2.8091	-0.269622	0.340829	-2.8091	-2.8091	-2.8091	-2.8091	-2.8091	-2.8091
rno-piR-1195	0.702996	-2.8091	-1.9595	-2.8091	-2.8091	-2.8091	-2.8091	-2.8091	-2.8091	-2.8091	-2.8091	-2.8091	-2.8091	-2.8091	-2.8091	-2.8091	-2.8091	-2.8091	-2.8091	-2.8091	-2.8091	-2.8091	-2.8091	-2.8091
rno-piR-11951	-2.8091	-2.8091	-2.8091	-2.8091	-2.8091	-2.8091	-2.8091	-2.8091	-2.8091	0.960112	-2.8091	-2.8091	-2.8091	-0.857667	-2.8091	-2.8091	-2.8091	-2.8091	0.0317522	-2.8091	-2.8091	-2.8091	-2.8091	-2.8091
rno-piR-11953	3.1481	2.65405	3.54115	2.24327	2.99691	2.6447	-2.8091	0.646749	-2.8091	2.67978	4.72652	-2.8091	-2.8091	2.27252	4.99476	2.12834	2.5775	3.04622	2.6637	-2.8091	-2.8091	-2.8091	2.82617	0.944813
rno-piR-11954	-2.8091	-2.8091	-1.9595	-2.8091	-2.8091	-2.8091	-2.8091	-2.8091	-2.8091	-2.8091	-2.8091	-2.8091	-2.8091	-2.8091	-2.8091	-2.8091	-0.912094	-2.8091	-2.8091	-2.8091	-2.8091	-2.8091	-2.8091	-2.8091
rno-piR-11958	1.34239	-0.246323	-0.594968	1.49727	-0.691621	-0.403412	-2.8091	0.646749	-2.8091	-2.8091	-2.8091	-2.8091	-2.8091	0.840636	-2.8091	-2.8091	0.493989	-0.401497	0.0317522	-2.8091	-2.8091	1.42735	-2.8091	-2.8091
rno-piR-11960	-2.8091	-2.8091	-2.8091	-0.817012	-2.8091	-2.8091	-2.8091	-2.8091	-2.8091	-2.8091	-2.8091	-2.8091	-2.8091	-2.8091	-2.8091	-2.8091	-2.8091	0.340829	-2.8091	-2.8091	-2.8091	-2.8091	-2.8091	-2.8091
rno-piR-11961	3.83651	2.69785	2.37037	1.9181	2.53155	1.46788	-2.8091	0.646749	-2.8091	2.40414	3.6445	-2.8091	-2.8091	1.7281	-2.8091	3.24624	1.1807	3.49219	2.26962	-2.8091	-2.8091	-2.8091	4.592	5.05692
rno-piR-11962	-2.8091	-0.640445	-1.62376	-2.8091	-2.8091	-0.403412	-2.8091	2.05668	-2.8091	-2.8091	-2.8091	-2.8091	-2.8091	-2.8091	-2.8091	-2.8091	-2.8091	-2.8091	1.34924	1.30646	-2.8091	-2.8091	-2.8091	-2.8091
rno-piR-11963	-2.8091	-1.21021	-0.0327353	-2.8091	-0.691621	-2.8091	-2.8091	-2.8091	-2.8091	-2.8091	-2.8091	-2.8091	-2.8091	-0.857667	-2.8091	-2.8091	0.163835	0.340829	-2.8091	-2.8091	-2.8091	-2.8091	-2.8091	-2.8091
rno-piR-11964	-2.8091	-2.8091	-2.8091	-2.8091	-2.8091	-2.8091	-2.8091	-2.8091	-2.8091	-2.8091	-2.8091	-2.8091	-2.8091	-0.857667	-2.8091	-2.8091	-0.912094	-0.401497	-2.8091	3.75072	-2.8091	-2.8091	-2.8091	-2.8091
rno-piR-11965	-2.8091	-2.8091	-1.9595	0.290504	-0.00243066	-2.8091	-2.8091	-2.8091	-2.8091	-2.8091	-2.8091	-2.8091	-2.8091	-2.8091	-2.8091	-2.8091	-0.912094	-0.401497	-2.8091	-0.305325	-2.8091	-2.8091	-2.8091	-2.8091
rno-piR-11968	0.228153	-2.8091	-1.37586	-0.817012	-2.8091	-2.8091	-2.8091	-2.8091	-2.8091	-2.8091	-2.8091	-2.8091	-2.8091	-2.8091	-2.8091	-2.8091	-2.8091	-2.8091	-2.8091	-2.8091	-2.8091	-2.8091	-2.8091	-2.8091
rno-piR-11969	-2.8091	-2.8091	-1.00219	-0.153685	-0.00243066	-2.8091	-2.8091	1.51844	-2.8091	-2.8091	-2.8091	-2.8091	-2.8091	0.236575	-2.8091	-2.8091	-0.912094	-2.8091	-2.8091	-2.8091	-2.8091	-2.8091	-2.8091	0.944813
rno-piR-1197	-2.8091	-2.8091	-1.62376	-2.8091	-0.00243066	-2.8091	-2.8091	-2.8091	-2.8091	-2.8091	-2.8091	-2.8091	-2.8091	-2.8091	-2.8091	-2.8091	-2.8091	-2.8091	-2.8091	-2.8091	-2.8091	-2.8091	-2.8091	-2.8091
rno-piR-11971	0.228153	-2.8091	-1.37586	-0.817012	-2.8091	0.338593	-2.8091	2.44751	-2.8091	-2.8091	-2.8091	-2.8091	-2.8091	-2.8091	-2.8091	-2.8091	-2.8091	-2.8091	-2.8091	-2.8091	-2.8091	-2.8091	-2.8091	-2.8091
rno-piR-11973	-2.8091	-1.21021	-1.37586	-2.8091	-2.8091	-2.8091	-2.8091	-2.8091	-2.8091	-2.8091	-2.8091	-2.8091	-2.8091	-2.8091	-2.8091	-2.8091	-0.912094	-2.8091	0.0317522	2.38485	-2.8091	-2.8091	-2.8091	-2.8091
rno-piR-11975	0.702996	-1.21021	1.11127	0.627278	0.79938	0.338593	-2.8091	-2.8091	-2.8091	0.469226	-2.8091	-2.8091	-2.8091	-0.857667	-2.8091	-2.8091	0.493989	0.823464	0.838007	4.73546	-2.8091	-2.8091	-2.8091	-2.8091
rno-piR-11976	-2.8091	-2.8091	-1.9595	-2.8091	-2.8091	-2.8091	-2.8091	0.646749	-2.8091	-2.8091	-2.8091	-2.8091	-2.8091	-0.857667	-2.8091	-2.8091	-0.912094	-2.8091	-2.8091	-2.8091	-2.8091	-2.8091	-2.8091	-2.8091
rno-piR-11977	-0.497571	-2.8091	-0.851482	-2.8091	-0.691621	-2.8091	-2.8091	-2.8091	-2.8091	-2.8091	-2.8091	-2.8091	-2.8091	-0.857667	-2.8091	-2.8091	-2.8091	-2.8091	0.0317522	-2.8091	-2.8091	-2.8091	-2.8091	-2.8091
rno-piR-11979	1.05817	-0.640445	0.807944	-0.153685	-0.00243066	1.70704	-2.8091	-2.8091	-2.8091	0.469226	-2.8091	-2.8091	6.72807	-2.8091	-2.8091	4.05744	-0.912094	0.823464	0.838007	3.69063	-2.8091	-2.8091	-2.8091	-2.8091
rno-piR-11982	-2.8091	-2.8091	-1.62376	-0.153685	-0.00243066	-2.8091	-2.8091	-2.8091	-2.8091	-2.8091	2.46457	2.98098	-2.8091	-0.857667	-2.8091	-2.8091	-2.8091	-0.401497	0.838007	2.04396	-2.8091	3.125	-2.8091	-2.8091
rno-piR-11983	-0.497571	-2.8091	-0.851482	-2.8091	-0.00243066	-2.8091	-2.8091	-2.8091	-2.8091	-2.8091	-2.8091	-2.8091	-2.8091	-2.8091	-2.8091	-2.8091	-2.8091	-0.401497	-2.8091	-2.8091	-2.8091	-2.8091	-2.8091	-2.8091
rno-piR-11984	2.51144	2.46417	3.76306	2.92587	2.85784	1.70704	2.54268	-2.8091	-2.8091	0.469226	3.6445	2.03091	-2.8091	2.17888	-2.8091	1.21556	3.04349	3.55475	1.72527	-2.8091	-2.8091	3.76005	-2.8091	-2.8091
rno-piR-11986	-2.8091	-2.8091	-1.00219	-2.8091	-2.8091	-2.8091	-2.8091	-2.8091	-2.8091	-2.8091	1.9153	-2.8091	-2.8091	-2.8091	-2.8091	-2.8091	-2.8091	-2.8091	-2.8091	-2.8091	-2.8091	-2.8091	-2.8091	-2.8091
rno-piR-11987	-2.8091	-2.8091	-1.62376	-0.817012	-2.8091	-2.8091	-2.8091	-2.8091	-2.8091	-2.8091	-2.8091	-2.8091	-2.8091	-2.8091	-2.8091	-2.8091	-2.8091	-2.8091	-2.8091	-2.8091	-2.8091	-2.8091	-2.8091	-2.8091
rno-piR-11988	0.702996	-0.640445	-0.483425	-2.8091	-2.8091	-2.8091	-2.8091	-2.8091	-2.8091	-2.8091	-2.8091	-2.8091	-2.8091	0.236575	-2.8091	-2.8091	-2.8091	-0.401497	-2.8091	-2.8091	-2.8091	-2.8091	-2.8091	-2.8091
rno-piR-11989	-2.8091	-0.640445	-0.111754	-0.153685	-2.8091	-2.8091	-2.8091	-2.8091	-2.8091	1.85633	-2.8091	-2.8091	-2.8091	-0.203124	-2.8091	-2.8091	-2.8091	0.340829	1.34924	-2.8091	-2.8091	-2.8091	-2.8091	-2.8091
rno-piR-11991	-2.8091	-2.8091	-2.8091	-2.8091	-2.8091	-2.8091	-2.8091	-2.8091	-2.8091	-2.8091	-2.8091	-2.8091	-2.8091	-2.8091	-2.8091	-2.8091	-0.912094	-2.8091	0.0317522	-2.8091	-2.8091	-2.8091	-2.8091	-2.8091
rno-piR-11994	-0.497571	-2.8091	-1.9595	-2.8091	-0.691621	-2.8091	-2.8091	-2.8091	-2.8091	-2.8091	-2.8091	-2.8091	-2.8091	-2.8091	-2.8091	-2.8091	-2.8091	-0.401497	2.02303	-2.8091	-2.8091	-2.8091	-2.8091	-2.8091
rno-piR-11995	-2.8091	-1.21021	-0.284903	-0.153685	-0.691621	-2.8091	-2.8091	-2.8091	-2.8091	-2.8091	-2.8091	-2.8091	-2.8091	-2.8091	-2.8091	-2.8091	-2.8091	0.340829	-2.8091	-2.8091	-2.8091	-2.8091	-2.8091	-2.8091
rno-piR-11997	-2.8091	-2.8091	-1.62376	-2.8091	-2.8091	0.821078	-2.8091	-2.8091	-2.8091	-2.8091	-2.8091	-2.8091	-2.8091	-0.203124	-2.8091	-2.8091	-2.8091	-2.8091	0.0317522	-2.8091	-2.8091	-2.8091	-2.8091	-2.8091
rno-piR-11998	-2.8091	-2.8091	-1.9595	-2.8091	-0.691621	-2.8091	-2.8091	-2.8091	-2.8091	-0.291042	-2.8091	-2.8091	-2.8091	-2.8091	-2.8091	-2.8091	-2.8091	-2.8091	0.0317522	-2.8091	-2.8091	-2.8091	-2.8091	-2.8091
rno-piR-11999	-2.8091	-2.8091	-1.9595	-0.817012	-0.691621	-2.8091	-2.8091	-2.8091	-2.8091	-2.8091	-2.8091	-2.8091	-2.8091	0.570591	-2.8091	-2.8091	-2.8091	-2.8091	-2.8091	-2.8091	-2.8091	-2.8091	-2.8091	0.944813
rno-piR-1200	-2.8091	-1.21021	-1.37586	-2.8091	-0.691621	-2.8091	-2.8091	-2.8091	-2.8091	-2.8091	-2.8091	-2.8091	-2.8091	-2.8091	-2.8091	-2.8091	-0.912094	-0.401497	-2.8091	-2.8091	-2.8091	-2.8091	-2.8091	-2.8091
rno-piR-12001	-2.8091	-2.8091	-1.00219	-0.817012	-2.8091	-2.8091	-2.8091	-2.8091	-2.8091	0.469226	-2.8091	-2.8091	-2.8091	-2.8091	-2.8091	-2.8091	-0.912094	-2.8091	-2.8091	-2.8091	-2.8091	-2.8091	-2.8091	-2.8091
rno-piR-12002	-2.8091	-2.8091	-1.37586	-2.8091	-2.8091	-2.8091	1.08683	-2.8091	-2.8091	-2.8091	-2.8091	-2.8091	-2.8091	-2.8091	-2.8091	-2.8091	-2.8091	-2.8091	-2.8091	-2.8091	-2.8091	-2.8091	-2.8091	4.44204
rno-piR-12003	-2.8091	-2.8091	-1.9595	-2.8091	-2.8091	-2.8091	-2.8091	-2.8091	-2.8091	-0.291042	2.46457	-2.8091	-2.8091	-2.8091	-2.8091	-2.8091	-2.8091	-2.8091	-2.8091	-2.8091	-2.8091	-2.8091	-2.8091	-2.8091
rno-piR-12004	-2.8091	-2.8091	-2.8091	-2.8091	-2.8091	-2.8091	-2.8091	-2.8091	-2.8091	-2.8091	-2.8091	-2.8091	-2.8091	-0.857667	-2.8091	-2.8091	-2.8091	-2.8091	-2.8091	-2.8091	-2.8091	-2.8091	-2.8091	-2.8091
rno-piR-12006	-2.8091	-2.8091	-2.8091	-2.8091	-0.00243066	-0.403412	2.94032	-2.8091	-2.8091	-2.8091	-2.8091	-2.8091	-2.8091	-2.8091	-2.8091	-2.8091	-0.269622	-2.8091	0.838007	-2.8091	-2.8091	-2.8091	-2.8091	-2.8091
rno-piR-12007	-2.8091	-2.8091	-2.8091	-2.8091	-2.8091	-2.8091	-2.8091	-2.8091	-2.8091	-2.8091	-2.8091	-2.8091	-2.8091	-2.8091	-2.8091	-2.8091	-2.8091	-2.8091	-2.8091	5.05431	-2.8091	-2.8091	-2.8091	-2.8091
rno-piR-12008	-2.8091	-2.8091	-2.8091	-2.8091	-2.8091	-0.403412	-2.8091	-2.8091	-2.8091	-2.8091	-2.8091	-2.8091	-2.8091	-2.8091	-2.8091	-2.8091	-2.8091	-0.401497	-2.8091	-2.8091	-2.8091	-2.8091	-2.8091	-2.8091
rno-piR-12009	-2.8091	-2.8091	-2.8091	-2.8091	-2.8091	-0.403412	-2.8091	-2.8091	-2.8091	-2.8091	-2.8091	-2.8091	-2.8091	-2.8091	-2.8091	-2.8091	-2.8091	-2.8091	-2.8091	-2.8091	-2.8091	-2.8091	-2.8091	-2.8091
rno-piR-1201	-2.8091	-2.8091	-2.8091	-2.8091	-2.8091	-0.403412	-2.8091	-2.8091	-2.8091	-2.8091	-2.8091	-2.8091	-2.8091	-2.8091	-2.8091	-2.8091	-2.8091	-2.8091	-2.8091	-2.8091	-2.8091	-2.8091	-2.8091	-2.8091
rno-piR-12010	-0.497571	-2.8091	-1.00219	-2.8091	-2.8091	-2.8091	-2.8091	-2.8091	-2.8091	-2.8091	-2.8091	-2.8091	-2.8091	-2.8091	-2.8091	-2.8091	-2.8091	-2.8091	-2.8091	4.15816	-2.8091	-2.8091	-2.8091	-2.8091
rno-piR-12012	-0.497571	-2.8091	-0.380507	-0.817012	0.454729	-0.403412	-2.8091	-2.8091	-2.8091	-2.8091	3.17201	-2.8091	-2.8091	-2.8091	-2.8091	-2.8091	0.493989	-2.8091	0.838007	-2.8091	-2.8091	-2.8091	-2.8091	-2.8091
rno-piR-12013	-2.8091	-2.8091	-1.9595	-2.8091	-2.8091	-2.8091	-2.8091	-2.8091	-2.8091	-2.8091	-2.8091	-2.8091	-2.8091	-2.8091	-2.8091	-2.8091	-2.8091	-2.8091	-2.8091	-2.8091	-2.8091	-2.8091	-2.8091	-2.8091
rno-piR-12014	-2.8091	-2.8091	-0.380507	-2.8091	-0.00243066	-2.8091	-2.8091	-2.8091	-2.8091	-2.8091	-2.8091	-2.8091	-2.8091	-2.8091	-2.8091	-2.8091	-2.8091	-2.8091	-2.8091	-2.8091	-2.8091	-2.8091	-2.8091	-2.8091
rno-piR-12015	-0.497571	-2.8091	-0.716865	-2.8091	-0.691621	-2.8091	-2.8091	-2.8091	-2.8091	-2.8091	-2.8091	-2.8091	-2.8091	-0.203124	-2.8091	-2.8091	-2.8091	-2.8091	-2.8091	-2.8091	-2.8091	-2.8091	1.88149	4.54761
rno-piR-12017	3.83651	1.48508	3.10175	1.65165	2.33573	2.85785	-2.8091	0.646749	-2.8091	-2.8091	2.86126	-2.8091	-2.8091	2.85997	-2.8091	2.68242	0.986392	2.39711	0.0317522	-2.8091	-2.8091	-2.8091	-2.8091	-2.8091
rno-piR-12019	-2.8091	-2.8091	-1.00219	-0.817012	-2.8091	-0.403412	-2.8091	-2.8091	-2.8091	-2.8091	-2.8091	-2.8091	-2.8091	-2.8091	-2.8091	-2.8091	-2.8091	0.823464	1.72527	-2.8091	-2.8091	-2.8091	-2.8091	-2.8091
rno-piR-12021	-2.8091	-2.8091	-2.8091	-2.8091	-2.8091	-2.8091	-2.8091	-2.8091	-2.8091	-2.8091	-2.8091	-2.8091	-2.8091	-0.857667	-2.8091	-2.8091	-2.8091	-2.8091	-2.8091	-2.8091	-2.8091	0.563112	-2.8091	-2.8091
rno-piR-12022	-2.8091	-2.8091	-1.62376	-0.817012	-2.8091	-2.8091	-2.8091	-2.8091	-2.8091	-2.8091	-2.8091	-2.8091	-2.8091	-2.8091	-2.8091	4.51016	-2.8091	-2.8091	-2.8091	-2.8091	-2.8091	-2.8091	-2.8091	-2.8091
rno-piR-12026	-2.8091	-2.8091	-0.716865	-2.8091	-2.8091	-2.8091	-2.8091	-2.8091	-2.8091	-0.291042	-2.8091	-2.8091	-2.8091	-2.8091	-2.8091	-2.8091	-0.912094	-0.401497	-2.8091	-2.8091	-2.8091	-2.8091	-2.8091	-2.8091
rno-piR-12027	-2.8091	-2.8091	-1.9595	-2.8091	-2.8091	-2.8091	-2.8091	-2.8091	-2.8091	-2.8091	-2.8091	-2.8091	-2.8091	-2.8091	-2.8091	-2.8091	-2.8091	-2.8091	-2.8091	-2.8091	-2.8091	-2.8091	-2.8091	-2.8091
rno-piR-12028	-0.497571	-2.8091	-2.8091	-0.817012	-2.8091	-2.8091	-2.8091	-2.8091	-2.8091	-2.8091	-2.8091	-2.8091	-2.8091	-2.8091	-2.8091	-2.8091	-2.8091	-2.8091	-2.8091	-2.8091	-2.8091	-2.8091	-2.8091	-2.8091
rno-piR-1203	-2.8091	-2.8091	-0.716865	-2.8091	-0.00243066	-2.8091	-2.8091	-2.8091	-2.8091	-2.8091	-2.8091	-2.8091	-2.8091	-2.8091	-2.8091	-2.8091	-0.912094	-0.401497	-2.8091	-2.8091	-2.8091	-2.8091	-2.8091	-2.8091
rno-piR-12030	-2.8091	-0.640445	-1.17414	-0.153685	-2.8091	-2.8091	-2.8091	-2.8091	-2.8091	-2.8091	-2.8091	-2.8091	-2.8091	-0.857667	-2.8091	-2.8091	-0.269622	-0.401497	0.0317522	-2.8091	-2.8091	3.76005	-2.8091	-2.8091
rno-piR-12031	-0.497571	-2.8091	-1.37586	-2.8091	-2.8091	-0.403412	-2.8091	-2.8091	-2.8091	-2.8091	-2.8091	-2.8091	-2.8091	-2.8091	-2.8091	-2.8091	-0.912094	-2.8091	0.0317522	-2.8091	-2.8091	-2.8091	-2.8091	-2.8091
rno-piR-12033	-2.8091	-2.8091	-1.00219	-2.8091	-0.00243066	-2.8091	-2.8091	-2.8091	-2.8091	-2.8091	1.01527	-2.8091	-2.8091	-2.8091	-2.8091	-2.8091	-2.8091	-2.8091	-2.8091	-2.8091	-2.8091	-2.8091	-2.8091	-2.8091
rno-piR-12034	-2.8091	-2.8091	0.112934	-2.8091	-2.8091	-2.8091	1.08683	-2.8091	-2.8091	-2.8091	-2.8091	-2.8091	-2.8091	-0.857667	-2.8091	-2.8091	-2.8091	-2.8091	-2.8091	-2.8091	-2.8091	-2.8091	-2.8091	-2.8091
rno-piR-12035	-0.497571	-2.8091	-2.8091	-0.817012	-2.8091	-2.8091	-2.8091	-2.8091	-2.8091	-2.8091	-2.8091	-2.8091	-2.8091	-2.8091	-2.8091	-2.8091	-2.8091	-2.8091	-2.8091	0.942549	-2.8091	-2.8091	-2.8091	-2.8091
rno-piR-12036	-2.8091	-2.8091	-1.9595	-2.8091	-2.8091	-2.8091	-2.8091	-2.8091	-2.8091	-2.8091	-2.8091	3.95503	-2.8091	-2.8091	-2.8091	-2.8091	-2.8091	-2.8091	-2.8091	-2.8091	-2.8091	-2.8091	-2.8091	-2.8091
rno-piR-12037	-2.8091	-2.8091	-0.716865	-2.8091	-0.691621	-0.403412	-2.8091	-2.8091	-2.8091	-2.8091	-2.8091	-2.8091	-2.8091	-2.8091	-2.8091	-2.8091	-2.8091	-2.8091	0.0317522	-2.8091	-2.8091	-2.8091	-2.8091	-2.8091
rno-piR-12038	-0.497571	-2.8091	-0.851482	-2.8091	-2.8091	-2.8091	-2.8091	-2.8091	-2.8091	-2.8091	-2.8091	-2.8091	-2.8091	-2.8091	-2.8091	-2.8091	-2.8091	0.340829	-2.8091	-2.8091	-2.8091	-2.8091	-2.8091	-2.8091
rno-piR-12039	-2.8091	-2.8091	-0.483425	-0.817012	-2.8091	-2.8091	-2.8091	-2.8091	-2.8091	-2.8091	-2.8091	-2.8091	-2.8091	-2.8091	-2.8091	-2.8091	-0.912094	-2.8091	0.0317522	-2.8091	-2.8091	-2.8091	-2.8091	-2.8091
rno-piR-12040	-0.497571	-2.8091	-0.851482	-2.8091	-0.691621	-0.403412	-2.8091	-2.8091	-2.8091	1.32461	-2.8091	-2.8091	-2.8091	-0.203124	4.99476	-2.8091	-0.912094	-2.8091	0.838007	-2.8091	-2.8091	4.60892	-2.8091	-2.8091
rno-piR-12042	-2.8091	-2.8091	-2.8091	-2.8091	-2.8091	-0.403412	-2.8091	-2.8091	-2.8091	0.469226	-2.8091	-2.8091	-2.8091	-2.8091	-2.8091	-2.8091	-2.8091	-2.8091	-2.8091	-2.8091	-2.8091	0.563112	-2.8091	-2.8091
rno-piR-12043	-2.8091	-2.8091	-2.8091	-2.8091	-0.691621	-2.8091	-2.8091	-2.8091	-2.8091	-2.8091	-2.8091	-2.8091	-2.8091	-2.8091	-2.8091	-2.8091	-2.8091	-2.8091	-2.8091	-2.8091	-2.8091	-2.8091	-2.8091	-2.8091
rno-piR-12044	-2.8091	-2.8091	-0.483425	-2.8091	-0.691621	-2.8091	-2.8091	-2.8091	-2.8091	-2.8091	-2.8091	-2.8091	-2.8091	0.236575	-2.8091	-2.8091	-0.912094	-2.8091	-2.8091	-2.8091	-2.8091	-2.8091	-2.8091	-2.8091
rno-piR-12045	3.58823	1.3812	2.05351	2.24327	2.10903	1.70704	3.72484	3.98216	-2.8091	3.64783	-2.8091	-2.8091	-2.8091	1.43551	-2.8091	-2.8091	1.50456	1.70961	2.48009	3.2656	-2.8091	2.91032	-2.8091	-2.8091
rno-piR-12046	-2.8091	-1.21021	-2.8091	-2.8091	-0.691621	-2.8091	-2.8091	-2.8091	-2.8091	-2.8091	-2.8091	-2.8091	-2.8091	-2.8091	-2.8091	-2.8091	-2.8091	-2.8091	-2.8091	-2.8091	-2.8091	-2.8091	-2.8091	-2.8091
rno-piR-12047	-2.8091	-2.8091	-2.8091	-2.8091	-2.8091	-0.403412	-2.8091	-2.8091	-2.8091	-2.8091	-2.8091	-2.8091	-2.8091	-2.8091	-2.8091	-2.8091	-2.8091	-2.8091	-2.8091	-2.8091	-2.8091	-2.8091	-2.8091	-2.8091
rno-piR-12049	-2.8091	-2.8091	-1.37586	-2.8091	-2.8091	-2.8091	-2.8091	-2.8091	-2.8091	-2.8091	3.83307	-2.8091	-2.8091	-2.8091	-2.8091	-2.8091	-2.8091	-2.8091	-2.8091	-2.8091	-2.8091	-2.8091	-2.8091	-2.8091
rno-piR-1205	-0.497571	-1.21021	-1.9595	-0.817012	-2.8091	-0.403412	1.08683	-2.8091	-2.8091	-2.8091	-2.8091	-2.8091	-2.8091	-0.203124	-2.8091	-2.8091	0.163835	-0.401497	-2.8091	-2.8091	-2.8091	-2.8091	-2.8091	-2.8091
rno-piR-12050	-2.8091	-2.8091	-1.9595	-2.8091	-2.8091	-2.8091	-2.8091	-2.8091	-2.8091	-2.8091	-2.8091	-2.8091	-2.8091	-2.8091	-2.8091	-2.8091	-2.8091	-2.8091	-2.8091	-2.8091	-2.8091	-2.8091	-2.8091	-2.8091
rno-piR-12051	1.05817	-1.21021	-0.594968	-0.153685	-0.691621	0.338593	-2.8091	-2.8091	-2.8091	1.85633	-2.8091	-2.8091	-2.8091	-0.203124	-2.8091	-2.8091	-2.8091	0.340829	-2.8091	-2.8091	-2.8091	-2.8091	-2.8091	-2.8091
rno-piR-12052	-2.8091	-2.8091	-2.8091	-2.8091	-2.8091	-2.8091	-2.8091	-2.8091	-2.8091	-2.8091	-2.8091	-2.8091	-2.8091	-2.8091	-2.8091	0.370133	-2.8091	-2.8091	-2.8091	-2.8091	-2.8091	-2.8091	-2.8091	-2.8091
rno-piR-12055	-2.8091	-2.8091	-1.00219	-0.153685	-2.8091	-2.8091	-2.8091	-2.8091	-2.8091	-2.8091	-2.8091	-2.8091	-2.8091	-2.8091	4.41621	-2.8091	-0.269622	-0.401497	0.0317522	2.04396	-2.8091	-2.8091	-2.8091	-2.8091
rno-piR-12056	-2.8091	-1.21021	-2.8091	-0.153685	-2.8091	-2.8091	-2.8091	-2.8091	-2.8091	-2.8091	-2.8091	-2.8091	-2.8091	-2.8091	-2.8091	-2.8091	-2.8091	-2.8091	-2.8091	-2.8091	-2.8091	-2.8091	-2.8091	-2.8091
rno-piR-12057	2.51144	1.14769	1.98082	1.9181	1.98073	1.46788	-2.8091	-2.8091	-2.8091	-2.8091	-2.8091	-2.8091	-2.8091	1.7281	-2.8091	-2.8091	1.76863	2.39711	1.72527	3.18077	-2.8091	-2.8091	-2.8091	-2.8091
rno-piR-12058	-2.8091	-2.8091	-2.8091	-2.8091	-0.691621	-2.8091	-2.8091	-2.8091	-2.8091	-2.8091	-2.8091	-2.8091	-2.8091	-2.8091	-2.8091	-2.8091	-2.8091	-2.8091	0.0317522	-2.8091	-2.8091	-2.8091	-2.8091	-2.8091
rno-piR-1206	-2.8091	-2.8091	-2.8091	-2.8091	-2.8091	-2.8091	1.08683	-2.8091	-2.8091	-2.8091	-2.8091	-2.8091	-2.8091	-2.8091	-2.8091	-2.8091	-2.8091	-2.8091	-2.8091	-2.8091	-2.8091	-2.8091	-2.8091	-2.8091
rno-piR-12060	-2.8091	-1.21021	-0.851482	-0.817012	-2.8091	-2.8091	-2.8091	-2.8091	-2.8091	-2.8091	-2.8091	-2.8091	-2.8091	-2.8091	-2.8091	-2.8091	-2.8091	-0.401497	0.0317522	-2.8091	-2.8091	2.35186	-2.8091	-2.8091
rno-piR-12061	-2.8091	-2.8091	-0.594968	0.627278	-0.00243066	-2.8091	-2.8091	2.75461	3.24626	-2.8091	3.17201	4.53119	-2.8091	-0.857667	3.43517	-2.8091	-0.912094	-0.401497	-2.8091	-2.8091	-2.8091	-2.8091	-2.8091	-2.8091
rno-piR-12062	-2.8091	-2.8091	-2.8091	-0.817012	-2.8091	-2.8091	-2.8091	-2.8091	-2.8091	-2.8091	-2.8091	-2.8091	-2.8091	-2.8091	-2.8091	-2.8091	-2.8091	-2.8091	-2.8091	-2.8091	-2.8091	-2.8091	-2.8091	-2.8091
rno-piR-12063	-2.8091	-2.8091	-2.8091	-2.8091	-2.8091	-2.8091	-2.8091	-2.8091	5.38236	-2.8091	-2.8091	-2.8091	-2.8091	-2.8091	-2.8091	-2.8091	-2.8091	-2.8091	-2.8091	-2.8091	-2.8091	-2.8091	-2.8091	-2.8091
rno-piR-12064	-2.8091	-2.8091	0.180423	-0.153685	-0.00243066	0.338593	-2.8091	-2.8091	-2.8091	-2.8091	-2.8091	-2.8091	-2.8091	-0.857667	-2.8091	-2.8091	0.493989	-2.8091	-2.8091	-2.8091	-2.8091	-2.8091	-2.8091	-2.8091
rno-piR-12066	-2.8091	-2.8091	-2.8091	-2.8091	-2.8091	-2.8091	-2.8091	-2.8091	-2.8091	-2.8091	-2.8091	5.26105	-2.8091	-2.8091	-2.8091	-2.8091	-2.8091	-2.8091	-2.8091	-2.8091	-2.8091	-2.8091	-2.8091	-2.8091
rno-piR-12068	-2.8091	-2.8091	-0.594968	-0.817012	-2.8091	-2.8091	-2.8091	-2.8091	-2.8091	-2.8091	-2.8091	-2.8091	-2.8091	-2.8091	-2.8091	-2.8091	-2.8091	-2.8091	-2.8091	-2.8091	-2.8091	-2.8091	-2.8091	-2.8091
rno-piR-12069	-0.497571	-2.8091	-1.37586	-2.8091	-2.8091	-2.8091	-2.8091	-2.8091	-2.8091	-2.8091	-2.8091	-2.8091	-2.8091	-2.8091	-2.8091	-2.8091	-2.8091	-2.8091	-2.8091	-2.8091	-2.8091	-2.8091	-2.8091	-2.8091
rno-piR-1207	-2.8091	-2.8091	-1.9595	-2.8091	-2.8091	-2.8091	-2.8091	-2.8091	-2.8091	-0.291042	-2.8091	-2.8091	-2.8091	-2.8091	-2.8091	-2.8091	-2.8091	-2.8091	0.0317522	-2.8091	-2.8091	-2.8091	-2.8091	-2.8091
rno-piR-12070	-2.8091	-1.21021	-0.0327353	-0.153685	0.454729	-0.403412	1.08683	-2.8091	-2.8091	-2.8091	-2.8091	-2.8091	-2.8091	-0.203124	-2.8091	-2.8091	0.163835	-0.401497	-2.8091	1.83752	-2.8091	-2.8091	3.39198	-2.8091
rno-piR-12071	-2.8091	-2.8091	-2.8091	-2.8091	-2.8091	-2.8091	-2.8091	-2.8091	-2.8091	0.469226	-2.8091	-2.8091	-2.8091	-2.8091	-2.8091	-2.8091	-2.8091	-2.8091	-2.8091	-2.8091	-2.8091	-2.8091	-2.8091	-2.8091
rno-piR-12073	-2.8091	-2.8091	-1.62376	-2.8091	-2.8091	-2.8091	-2.8091	-2.8091	-2.8091	-2.8091	2.46457	-2.8091	-2.8091	-2.8091	-2.8091	-2.8091	-2.8091	-2.8091	-2.8091	-2.8091	-2.8091	-2.8091	-2.8091	-2.8091
rno-piR-12074	-2.8091	-2.8091	-1.62376	-2.8091	-0.00243066	1.18072	-2.8091	-2.8091	-2.8091	-2.8091	-2.8091	-2.8091	-2.8091	0.840636	-2.8091	-2.8091	-2.8091	-2.8091	0.0317522	-2.8091	-2.8091	-2.8091	-2.8091	-2.8091
rno-piR-12075	-2.8091	-2.8091	-2.8091	-2.8091	-0.691621	-2.8091	-2.8091	2.75461	-2.8091	-2.8091	-2.8091	-2.8091	-2.8091	-2.8091	-2.8091	-2.8091	-2.8091	-2.8091	-2.8091	-2.8091	-2.8091	-2.8091	-2.8091	-2.8091
rno-piR-12076	-2.8091	-2.8091	-2.8091	-2.8091	-2.8091	-2.8091	-2.8091	-2.8091	-2.8091	-2.8091	-2.8091	-2.8091	-2.8091	-2.8091	-2.8091	-2.8091	-2.8091	-2.8091	0.0317522	-0.305325	-2.8091	-2.8091	-2.8091	-2.8091
rno-piR-12077	-2.8091	-2.8091	-1.37586	-2.8091	-2.8091	0.821078	-2.8091	-2.8091	-2.8091	-0.291042	-2.8091	-2.8091	-2.8091	-2.8091	-2.8091	-2.8091	-0.912094	-0.401497	-2.8091	-2.8091	-2.8091	-2.8091	-2.8091	-2.8091
rno-piR-12078	1.7829	1.3812	2.56929	2.24327	2.78293	2.39445	-2.8091	-2.8091	-2.8091	1.32461	-2.8091	-2.8091	-2.8091	0.570591	-2.8091	2.89581	1.76863	1.47041	2.82654	4.51067	-2.8091	2.91032	2.82617	3.56495
rno-piR-12079	-2.8091	-1.21021	-2.8091	-2.8091	-2.8091	-2.8091	-2.8091	-2.8091	-2.8091	-2.8091	-2.8091	-2.8091	-2.8091	-2.8091	-2.8091	-2.8091	-2.8091	-2.8091	-2.8091	-2.8091	-2.8091	-2.8091	-2.8091	-2.8091
rno-piR-12080	-2.8091	-1.21021	-1.9595	-2.8091	-2.8091	-2.8091	-2.8091	-2.8091	-2.8091	-2.8091	-2.8091	-2.8091	-2.8091	-2.8091	-2.8091	-2.8091	-2.8091	-2.8091	0.0317522	-2.8091	-2.8091	-2.8091	-2.8091	-2.8091
rno-piR-12081	-2.8091	-1.21021	-1.9595	-2.8091	-2.8091	-2.8091	-2.8091	-2.8091	-2.8091	-2.8091	2.86126	-2.8091	-2.8091	-2.8091	-2.8091	-2.8091	-2.8091	-2.8091	-2.8091	-2.8091	-2.8091	-2.8091	-2.8091	-2.8091
rno-piR-12083	-2.8091	-2.8091	-1.9595	-2.8091	-2.8091	-2.8091	-2.8091	-2.8091	-2.8091	-2.8091	-2.8091	-2.8091	-2.8091	-2.8091	-2.8091	-2.8091	-2.8091	-2.8091	-2.8091	-2.8091	-2.8091	-2.8091	-2.8091	-2.8091
rno-piR-12085	-2.8091	-2.8091	-2.8091	-2.8091	-2.8091	-2.8091	-2.8091	-2.8091	-2.8091	-2.8091	-2.8091	2.03091	-2.8091	-2.8091	-2.8091	-2.8091	-2.8091	-2.8091	-2.8091	-2.8091	-2.8091	-2.8091	-2.8091	-2.8091
rno-piR-12086	-2.8091	-2.8091	-2.8091	-2.8091	-2.8091	-0.403412	-2.8091	-2.8091	-2.8091	-2.8091	-2.8091	-2.8091	-2.8091	-2.8091	-2.8091	-2.8091	-2.8091	-2.8091	-2.8091	-2.8091	-2.8091	-2.8091	-2.8091	-2.8091
rno-piR-12087	-2.8091	-0.640445	-0.716865	-0.153685	1.50838	0.338593	1.99161	1.51844	-2.8091	-2.8091	-2.8091	-2.8091	-2.8091	-2.8091	-2.8091	-2.8091	-2.8091	1.18319	0.838007	-2.8091	-2.8091	-2.8091	-2.8091	-2.8091
rno-piR-12088	-2.8091	-2.8091	-2.8091	-2.8091	-0.691621	-2.8091	-2.8091	3.22282	-2.8091	-2.8091	-2.8091	-2.8091	-2.8091	-2.8091	-2.8091	-2.8091	-2.8091	-2.8091	-2.8091	-2.8091	-2.8091	-2.8091	-2.8091	-2.8091
rno-piR-1209	0.228153	-2.8091	-1.9595	-0.817012	-0.00243066	-2.8091	-2.8091	-2.8091	-2.8091	-2.8091	-2.8091	-2.8091	-2.8091	-2.8091	-2.8091	-2.8091	-0.269622	0.340829	0.0317522	-2.8091	-2.8091	-2.8091	-2.8091	-2.8091
rno-piR-12090	-0.497571	-2.8091	0.180423	-0.817012	0.454729	-2.8091	-2.8091	-2.8091	-2.8091	-2.8091	1.9153	-2.8091	-2.8091	0.236575	-2.8091	-2.8091	-0.269622	0.823464	-2.8091	-2.8091	-2.8091	1.42735	-2.8091	-2.8091
rno-piR-12091	-2.8091	-2.8091	-1.9595	-2.8091	-2.8091	-2.8091	-2.8091	-2.8091	-2.8091	-2.8091	-2.8091	-2.8091	-2.8091	-2.8091	-2.8091	-2.8091	-2.8091	-2.8091	-2.8091	-2.8091	-2.8091	-2.8091	1.88149	-2.8091
rno-piR-12092	-2.8091	-2.8091	-1.9595	-2.8091	-2.8091	-2.8091	-2.8091	-2.8091	-2.8091	-2.8091	-2.8091	-2.8091	-2.8091	-2.8091	-2.8091	-2.8091	-2.8091	-2.8091	-2.8091	-2.8091	-2.8091	-2.8091	-2.8091	-2.8091
rno-piR-12094	-0.497571	-1.21021	0.180423	0.290504	-0.691621	-2.8091	-2.8091	-2.8091	-2.8091	-2.8091	-2.8091	-2.8091	-2.8091	0.570591	-2.8091	2.89581	0.7614	0.340829	0.0317522	-2.8091	-2.8091	-2.8091	-2.8091	-2.8091
rno-piR-12097	-2.8091	-0.640445	0.628027	1.9181	1.50838	0.821078	-2.8091	2.05668	-2.8091	2.54854	4.72652	6.57654	-2.8091	1.26331	-2.8091	0.370133	-0.912094	-0.401497	0.0317522	4.43945	-2.8091	2.65797	-2.8091	5.37638
rno-piR-12098	-2.8091	-1.21021	-1.37586	-2.8091	-0.691621	-2.8091	-2.8091	-2.8091	-2.8091	-2.8091	-2.8091	-2.8091	-2.8091	-2.8091	-2.8091	-2.8091	-2.8091	0.340829	-2.8091	-2.8091	-2.8091	-2.8091	-2.8091	-2.8091
rno-piR-12099	-2.8091	-0.640445	-2.8091	-0.817012	-2.8091	-2.8091	-2.8091	-2.8091	-2.8091	-2.8091	-2.8091	-2.8091	-2.8091	-2.8091	-2.8091	-2.8091	-2.8091	-0.401497	0.838007	-2.8091	-2.8091	-2.8091	-2.8091	-2.8091
rno-piR-12100	-2.8091	-2.8091	-1.62376	-2.8091	-2.8091	-2.8091	-2.8091	-2.8091	-2.8091	-2.8091	-2.8091	-2.8091	-2.8091	-2.8091	-2.8091	-2.8091	-2.8091	-2.8091	-2.8091	-2.8091	-2.8091	-2.8091	-2.8091	-2.8091
rno-piR-12101	-0.497571	-2.8091	-2.8091	-2.8091	-2.8091	-2.8091	-2.8091	-2.8091	-2.8091	-2.8091	-2.8091	-2.8091	-2.8091	-2.8091	-2.8091	-2.8091	-0.912094	-2.8091	-2.8091	-2.8091	-2.8091	-2.8091	-2.8091	-2.8091
rno-piR-12102	-2.8091	-2.8091	-1.62376	-2.8091	-0.691621	-0.403412	-2.8091	-2.8091	-2.8091	-2.8091	-2.8091	-2.8091	-2.8091	-2.8091	-2.8091	-2.8091	-2.8091	-2.8091	-2.8091	-2.8091	-2.8091	-2.8091	-2.8091	-2.8091
rno-piR-12103	-2.8091	-2.8091	-1.62376	-2.8091	-2.8091	-2.8091	-2.8091	-2.8091	-2.8091	-2.8091	-2.8091	-2.8091	-2.8091	-2.8091	-2.8091	-2.8091	-0.912094	-2.8091	-2.8091	-0.305325	-2.8091	-2.8091	-2.8091	-2.8091
rno-piR-12104	-2.8091	-2.8091	-1.62376	-2.8091	-2.8091	-2.8091	-2.8091	-2.8091	-2.8091	-2.8091	-2.8091	-2.8091	-2.8091	-2.8091	-2.8091	-2.8091	-2.8091	-2.8091	-2.8091	-2.8091	-2.8091	-2.8091	-2.8091	-2.8091
rno-piR-12105	-2.8091	-2.8091	-2.8091	-2.8091	-2.8091	-2.8091	-2.8091	-2.8091	-2.8091	-2.8091	-2.8091	-2.8091	-2.8091	-2.8091	-2.8091	-2.8091	-2.8091	-0.401497	-2.8091	-2.8091	-2.8091	-2.8091	-2.8091	-2.8091
rno-piR-12106	-2.8091	-2.8091	-0.380507	-2.8091	-2.8091	-2.8091	-2.8091	-2.8091	-2.8091	1.61494	-2.8091	-2.8091	-2.8091	-0.857667	-2.8091	-2.8091	-0.269622	-2.8091	0.0317522	-2.8091	-2.8091	-2.8091	-2.8091	-2.8091
rno-piR-12108	-2.8091	-1.21021	-1.62376	-2.8091	-0.691621	-2.8091	-2.8091	0.646749	-2.8091	-2.8091	-2.8091	-2.8091	-2.8091	-2.8091	-2.8091	-2.8091	-2.8091	-2.8091	-2.8091	-2.8091	-2.8091	-2.8091	-2.8091	-2.8091
rno-piR-12109	-2.8091	0.0587823	1.04127	-0.153685	-0.00243066	0.338593	-2.8091	-2.8091	-2.8091	0.469226	-2.8091	-2.8091	-2.8091	-0.203124	-2.8091	-2.8091	-0.912094	0.823464	-2.8091	-2.8091	-2.8091	2.91032	-2.8091	-2.8091
rno-piR-12110	-2.8091	-2.8091	-1.9595	-0.817012	-0.691621	-2.8091	-2.8091	-2.8091	-2.8091	-2.8091	-2.8091	-2.8091	-2.8091	-2.8091	-2.8091	-2.8091	-2.8091	-2.8091	-2.8091	-2.8091	-2.8091	-2.8091	-2.8091	-2.8091
rno-piR-12111	-2.8091	-2.8091	-1.00219	-2.8091	-2.8091	-2.8091	-2.8091	-2.8091	-2.8091	-2.8091	-2.8091	-2.8091	-2.8091	-0.857667	-2.8091	-2.8091	-2.8091	-2.8091	-2.8091	-2.8091	-2.8091	-2.8091	-2.8091	-2.8091
rno-piR-12113	-2.8091	-2.8091	-2.8091	-2.8091	-2.8091	-2.8091	-2.8091	-2.8091	-2.8091	-2.8091	-2.8091	-2.8091	-2.8091	-0.857667	-2.8091	-2.8091	-2.8091	-2.8091	-2.8091	-2.8091	-2.8091	-2.8091	-2.8091	-2.8091
rno-piR-12115	-2.8091	-2.8091	-1.62376	-2.8091	-0.691621	-2.8091	-2.8091	-2.8091	-2.8091	-2.8091	-2.8091	-2.8091	-2.8091	-2.8091	-2.8091	-2.8091	-0.912094	-2.8091	-2.8091	1.83752	-2.8091	1.42735	-2.8091	-2.8091
rno-piR-12116	-2.8091	-2.8091	-2.8091	-2.8091	-0.691621	-2.8091	-2.8091	-2.8091	-2.8091	-2.8091	-2.8091	-2.8091	-2.8091	-2.8091	-2.8091	-2.8091	-2.8091	-2.8091	-2.8091	-2.8091	-2.8091	-2.8091	-2.8091	-2.8091
rno-piR-12117	-0.497571	-2.8091	1.04127	-2.8091	-2.8091	-0.403412	-2.8091	-2.8091	-2.8091	-2.8091	-2.8091	-2.8091	-2.8091	-0.857667	-2.8091	-2.8091	-2.8091	-2.8091	-2.8091	4.51067	-2.8091	-2.8091	-2.8091	-2.8091
rno-piR-1212	2.51144	2.35894	2.35608	3.55284	2.43696	0.338593	4.08054	4.20085	-2.8091	2.54854	-2.8091	-2.8091	-2.8091	2.59598	-2.8091	-2.8091	2.50704	2.39711	3.33939	2.52915	7.13479	1.96264	-2.8091	-2.8091
rno-piR-12121	-0.497571	-2.8091	-2.8091	-2.8091	-2.8091	-2.8091	-2.8091	-2.8091	2.2881	-0.291042	-2.8091	-2.8091	-2.8091	-2.8091	-2.8091	-2.8091	-2.8091	-2.8091	0.0317522	-2.8091	-2.8091	-2.8091	4.11334	-2.8091
rno-piR-12124	-2.8091	-2.8091	-1.37586	-2.8091	-2.8091	-2.8091	-2.8091	-2.8091	-2.8091	-2.8091	-2.8091	-2.8091	-2.8091	-2.8091	-2.8091	-2.8091	-0.912094	-2.8091	-2.8091	-2.8091	-2.8091	-2.8091	-2.8091	-2.8091
rno-piR-12125	-2.8091	-2.8091	-2.8091	-2.8091	-2.8091	-2.8091	-2.8091	-2.8091	-2.8091	-2.8091	-2.8091	-2.8091	-2.8091	-2.8091	-2.8091	-2.8091	-0.912094	-2.8091	-2.8091	-2.8091	-2.8091	-2.8091	-2.8091	-2.8091
rno-piR-12126	3.35335	1.98736	2.95782	2.4253	2.70391	3.20796	-2.8091	-2.8091	-2.8091	0.469226	1.9153	-2.8091	-2.8091	1.06754	-2.8091	-2.8091	2.43296	3.21068	3.22725	5.19069	-2.8091	-2.8091	-2.8091	5.89942
rno-piR-12127	-2.8091	-2.8091	-1.9595	-0.817012	-0.691621	-2.8091	-2.8091	-2.8091	-2.8091	-2.8091	-2.8091	-2.8091	-2.8091	-2.8091	-2.8091	-2.8091	-2.8091	-2.8091	0.0317522	-2.8091	-2.8091	-2.8091	-2.8091	-2.8091
rno-piR-12129	-2.8091	-2.8091	-1.9595	-2.8091	-2.8091	-2.8091	-2.8091	-2.8091	-2.8091	-2.8091	-2.8091	-2.8091	-2.8091	-2.8091	-2.8091	-2.8091	-2.8091	-2.8091	-2.8091	-2.8091	-2.8091	-2.8091	-2.8091	-2.8091
rno-piR-1213	1.34239	0.0587823	0.0420094	-0.817012	0.454729	0.338593	-2.8091	0.646749	-2.8091	-0.291042	4.90527	-2.8091	-2.8091	-0.857667	-2.8091	0.370133	-2.8091	-2.8091	0.838007	2.66031	-2.8091	4.98355	3.79729	-2.8091
rno-piR-12130	-2.8091	-1.21021	-2.8091	-2.8091	-2.8091	-2.8091	-2.8091	-2.8091	-2.8091	-2.8091	-2.8091	-2.8091	-2.8091	-0.203124	-2.8091	-2.8091	-2.8091	-2.8091	0.0317522	-2.8091	-2.8091	-2.8091	-2.8091	-2.8091
rno-piR-12131	-0.497571	-2.8091	-1.17414	-2.8091	-0.00243066	-2.8091	-2.8091	-2.8091	-2.8091	-2.8091	-2.8091	-2.8091	-2.8091	-2.8091	-2.8091	-2.8091	-2.8091	-2.8091	-2.8091	-2.8091	-2.8091	-2.8091	-2.8091	-2.8091
rno-piR-12132	-2.8091	-2.8091	-2.8091	-2.8091	-2.8091	-2.8091	-2.8091	-2.8091	-2.8091	-2.8091	-2.8091	-2.8091	-2.8091	-0.857667	-2.8091	-2.8091	-2.8091	-2.8091	-2.8091	-2.8091	-2.8091	-2.8091	-2.8091	-2.8091
rno-piR-12133	-2.8091	-1.21021	-2.8091	-2.8091	-2.8091	-2.8091	-2.8091	-2.8091	-2.8091	-2.8091	-2.8091	-2.8091	-2.8091	-2.8091	-2.8091	-2.8091	-2.8091	-2.8091	-2.8091	-2.8091	-2.8091	-2.8091	-2.8091	-2.8091
rno-piR-12135	-2.8091	-2.8091	-0.0327353	-0.153685	-2.8091	-2.8091	-2.8091	-2.8091	-2.8091	-2.8091	-2.8091	-2.8091	-2.8091	-0.203124	-2.8091	-2.8091	-0.912094	-2.8091	-2.8091	-2.8091	-2.8091	-2.8091	-2.8091	-2.8091
rno-piR-12137	-2.8091	-2.8091	-1.17414	-2.8091	-2.8091	-2.8091	-2.8091	-2.8091	-2.8091	-2.8091	-2.8091	-2.8091	-2.8091	-2.8091	-2.8091	-2.8091	-2.8091	-2.8091	-2.8091	-2.8091	-2.8091	-2.8091	-2.8091	-2.8091
rno-piR-12139	-2.8091	-2.8091	-1.9595	-0.817012	-2.8091	-2.8091	-2.8091	-2.8091	-2.8091	-2.8091	-2.8091	-2.8091	-2.8091	-0.857667	-2.8091	3.52795	-2.8091	-2.8091	-2.8091	-2.8091	-2.8091	-2.8091	-2.8091	-2.8091
rno-piR-1214	1.34239	0.520875	-0.380507	1.65165	1.30869	0.338593	3.50757	-2.8091	-2.8091	3.28537	-2.8091	7.25299	-2.8091	1.06754	-2.8091	-2.8091	-0.912094	0.823464	1.72527	3.86386	4.15506	0.563112	-2.8091	-2.8091
rno-piR-12141	-2.8091	-2.8091	-2.8091	-2.8091	-2.8091	-2.8091	-2.8091	-2.8091	-2.8091	-2.8091	-2.8091	-2.8091	-2.8091	-2.8091	-2.8091	-2.8091	-0.912094	-2.8091	-2.8091	-2.8091	-2.8091	-2.8091	-2.8091	-2.8091
rno-piR-12142	-2.8091	-1.21021	-2.8091	-0.817012	-2.8091	-2.8091	-2.8091	-2.8091	-2.8091	-2.8091	-2.8091	-2.8091	-2.8091	-2.8091	-2.8091	-2.8091	-0.912094	0.340829	-2.8091	-2.8091	-2.8091	-2.8091	-2.8091	-2.8091
rno-piR-12143	-2.8091	-2.8091	-1.17414	-0.817012	-2.8091	-2.8091	-2.8091	-2.8091	-2.8091	-2.8091	-2.8091	-2.8091	-2.8091	-2.8091	-2.8091	-2.8091	-2.8091	0.340829	-2.8091	-2.8091	-2.8091	1.96264	-2.8091	-2.8091
rno-piR-12144	-2.8091	-2.8091	-1.17414	-0.153685	-2.8091	-2.8091	-2.8091	-2.8091	-2.8091	-2.8091	-2.8091	-2.8091	-2.8091	-2.8091	-2.8091	-2.8091	-2.8091	-2.8091	-2.8091	-2.8091	-2.8091	-2.8091	-2.8091	-2.8091
rno-piR-12145	-2.8091	-2.8091	-1.9595	-2.8091	-2.8091	-0.403412	-2.8091	-2.8091	-2.8091	-0.291042	-2.8091	-2.8091	-2.8091	-2.8091	-2.8091	-2.8091	-2.8091	-2.8091	0.0317522	-2.8091	-2.8091	0.563112	-2.8091	-2.8091
rno-piR-12146	1.7829	0.0587823	2.22064	1.12746	1.50838	1.91202	-2.8091	-2.8091	7.41441	3.64783	4.98697	-2.8091	-2.8091	1.06754	-2.8091	-2.8091	1.76863	1.18319	2.26962	-2.8091	-2.8091	-2.8091	-2.8091	-2.8091
rno-piR-12147	-2.8091	-2.8091	-1.9595	-2.8091	-2.8091	-2.8091	1.08683	-2.8091	-2.8091	-2.8091	-2.8091	-2.8091	-2.8091	-2.8091	-2.8091	-2.8091	-2.8091	-0.401497	-2.8091	-2.8091	-2.8091	-2.8091	-2.8091	-2.8091
rno-piR-12149	-2.8091	-1.21021	-2.8091	-2.8091	-0.691621	-2.8091	-2.8091	2.44751	-2.8091	-2.8091	-2.8091	-2.8091	-2.8091	-2.8091	-2.8091	-2.8091	-2.8091	-0.401497	0.0317522	-2.8091	-2.8091	-2.8091	-2.8091	-2.8091
rno-piR-1215	-2.8091	-2.8091	-0.716865	-2.8091	-2.8091	-2.8091	-2.8091	-2.8091	2.2881	-2.8091	3.17201	-2.8091	-2.8091	-2.8091	-2.8091	-2.8091	-2.8091	-2.8091	-2.8091	-2.8091	-2.8091	-2.8091	-2.8091	-2.8091
rno-piR-12153	-2.8091	-1.21021	-1.00219	-2.8091	-0.691621	-2.8091	-2.8091	-2.8091	-2.8091	-2.8091	-2.8091	-2.8091	-2.8091	-0.857667	-2.8091	-2.8091	-2.8091	-2.8091	0.0317522	-2.8091	-2.8091	-2.8091	-2.8091	-2.8091
rno-piR-12154	-2.8091	-2.8091	-1.9595	-0.153685	-2.8091	-2.8091	-2.8091	-2.8091	2.2881	-2.8091	-2.8091	-2.8091	-2.8091	-2.8091	4.41621	-2.8091	-2.8091	-2.8091	-2.8091	-2.8091	-2.8091	3.76005	-2.8091	-2.8091
rno-piR-12155	-2.8091	-2.8091	-1.37586	-2.8091	-2.8091	-2.8091	-2.8091	-2.8091	-2.8091	-2.8091	-2.8091	-2.8091	-2.8091	-2.8091	-2.8091	-2.8091	-2.8091	-2.8091	-2.8091	-2.8091	-2.8091	-2.8091	-2.8091	-2.8091
rno-piR-12156	-2.8091	-2.8091	-1.9595	-2.8091	-2.8091	-2.8091	-2.8091	-2.8091	-2.8091	-2.8091	-2.8091	-2.8091	-2.8091	-2.8091	-2.8091	-2.8091	-2.8091	-2.8091	-2.8091	-2.8091	-2.8091	-2.8091	-2.8091	-2.8091
rno-piR-12157	-0.497571	-2.8091	-2.8091	-2.8091	-2.8091	-2.8091	-2.8091	-2.8091	-2.8091	0.469226	-2.8091	-2.8091	-2.8091	-2.8091	-2.8091	-2.8091	-2.8091	-2.8091	-2.8091	-2.8091	-2.8091	-2.8091	-2.8091	-2.8091
rno-piR-12159	-2.8091	-2.8091	-1.9595	-2.8091	-2.8091	-2.8091	-2.8091	-2.8091	-2.8091	-2.8091	-2.8091	-2.8091	-2.8091	-2.8091	-2.8091	-2.8091	-2.8091	-2.8091	-2.8091	2.38485	-2.8091	2.35186	-2.8091	4.44204
rno-piR-1216	-2.8091	-1.21021	-0.851482	-2.8091	-0.691621	-0.403412	-2.8091	-2.8091	-2.8091	0.960112	2.46457	-2.8091	-2.8091	-0.203124	-2.8091	-2.8091	-2.8091	0.340829	0.0317522	-2.8091	-2.8091	-2.8091	-2.8091	-2.8091
rno-piR-12160	-2.8091	-2.8091	-1.37586	-2.8091	-2.8091	-2.8091	-2.8091	-2.8091	-2.8091	-2.8091	-2.8091	-2.8091	-2.8091	-2.8091	-2.8091	-2.8091	-2.8091	-2.8091	-2.8091	-2.8091	-2.8091	-2.8091	-2.8091	-2.8091
rno-piR-12164	-2.8091	-2.8091	-1.9595	-2.8091	-2.8091	-2.8091	-2.8091	-2.8091	-2.8091	-2.8091	-2.8091	-2.8091	-2.8091	-2.8091	-2.8091	-2.8091	-2.8091	-2.8091	-2.8091	-2.8091	-2.8091	-2.8091	-2.8091	-2.8091
rno-piR-12166	-2.8091	-2.8091	-1.62376	-0.817012	-2.8091	-2.8091	-2.8091	-2.8091	-2.8091	-2.8091	-2.8091	-2.8091	-2.8091	-0.857667	-2.8091	-2.8091	-0.912094	-2.8091	-2.8091	-2.8091	-2.8091	-2.8091	-2.8091	-2.8091
rno-piR-12167	-2.8091	-2.8091	-0.594968	-2.8091	0.454729	-0.403412	-2.8091	-2.8091	-2.8091	-2.8091	-2.8091	-2.8091	-2.8091	-2.8091	-2.8091	-2.8091	-0.912094	-2.8091	-2.8091	-2.8091	-2.8091	-2.8091	-2.8091	-2.8091
rno-piR-12168	2.51144	-2.8091	-0.380507	-0.817012	-0.691621	1.46788	-2.8091	-2.8091	-2.8091	2.06297	-2.8091	2.03091	-2.8091	0.236575	-2.8091	-2.8091	-0.912094	-2.8091	0.838007	-2.8091	-2.8091	-2.8091	-2.8091	-2.8091
rno-piR-1217	-2.8091	-2.8091	-1.37586	-2.8091	-2.8091	-0.403412	-2.8091	-2.8091	-2.8091	-2.8091	-2.8091	-2.8091	-2.8091	-2.8091	-2.8091	-2.8091	-2.8091	-2.8091	-2.8091	4.11309	-2.8091	-2.8091	-2.8091	-2.8091
rno-piR-12170	-2.8091	-2.8091	-1.62376	-0.817012	-0.691621	-2.8091	-2.8091	-2.8091	-2.8091	-2.8091	-2.8091	-2.8091	-2.8091	-2.8091	-2.8091	-2.8091	-0.912094	-2.8091	-2.8091	-2.8091	-2.8091	-2.8091	-2.8091	-2.8091
rno-piR-12172	-2.8091	-1.21021	-0.716865	-2.8091	-2.8091	-0.403412	-2.8091	-2.8091	-2.8091	-0.291042	-2.8091	-2.8091	-2.8091	-2.8091	-2.8091	-2.8091	-2.8091	-2.8091	-2.8091	-2.8091	-2.8091	-2.8091	-2.8091	-2.8091
rno-piR-12173	-2.8091	-1.21021	0.180423	-2.8091	-2.8091	-0.403412	-2.8091	-2.8091	-2.8091	-2.8091	-2.8091	-2.8091	-2.8091	0.570591	-2.8091	-2.8091	0.7614	0.340829	-2.8091	-2.8091	-2.8091	-2.8091	-2.8091	-2.8091
rno-piR-12174	-2.8091	-1.21021	-0.111754	-2.8091	-2.8091	-2.8091	-2.8091	-2.8091	-2.8091	-2.8091	-2.8091	-2.8091	-2.8091	-0.857667	-2.8091	-2.8091	-2.8091	-0.401497	0.0317522	-2.8091	-2.8091	-2.8091	-2.8091	-2.8091
rno-piR-12175	-2.8091	-2.8091	-1.00219	-2.8091	-2.8091	-2.8091	-2.8091	-2.8091	-2.8091	-2.8091	-2.8091	-2.8091	-2.8091	-2.8091	-2.8091	-2.8091	0.7614	-2.8091	-2.8091	-2.8091	-2.8091	-2.8091	-2.8091	-2.8091
rno-piR-12176	1.05817	0.520875	1.30282	2.03484	1.30869	1.70704	4.08054	0.646749	-2.8091	2.54854	4.62809	5.9351	-2.8091	0.236575	-2.8091	2.68242	1.1807	0.340829	3.10564	4.57855	-2.8091	5.08954	3.39198	3.56495
rno-piR-12179	-2.8091	-2.8091	-0.716865	-2.8091	-2.8091	-2.8091	-2.8091	-2.8091	-2.8091	1.32461	-2.8091	-2.8091	-2.8091	-0.857667	-2.8091	-2.8091	-2.8091	-2.8091	-2.8091	-2.8091	-2.8091	-2.8091	-2.8091	-2.8091
rno-piR-1218	-2.8091	-2.8091	-2.8091	-2.8091	-0.691621	-0.403412	-2.8091	-2.8091	-2.8091	-2.8091	-2.8091	-2.8091	-2.8091	-0.203124	-2.8091	-2.8091	-2.8091	-2.8091	0.0317522	2.22447	-2.8091	-2.8091	-2.8091	-2.8091
rno-piR-12181	0.228153	-2.8091	-1.62376	-2.8091	-2.8091	-2.8091	-2.8091	-2.8091	-2.8091	-2.8091	-2.8091	-2.8091	-2.8091	-2.8091	-2.8091	-2.8091	-2.8091	-2.8091	-2.8091	-2.8091	-2.8091	-2.8091	-2.8091	-2.8091
rno-piR-12182	-2.8091	-2.8091	-0.483425	-2.8091	-2.8091	0.338593	-2.8091	-2.8091	-2.8091	-2.8091	-2.8091	-2.8091	-2.8091	-2.8091	-2.8091	-2.8091	-2.8091	-0.401497	-2.8091	-2.8091	-2.8091	-2.8091	-2.8091	-2.8091
rno-piR-12184	-2.8091	-2.8091	-1.62376	-2.8091	-2.8091	-2.8091	-2.8091	-2.8091	-2.8091	-2.8091	-2.8091	-2.8091	-2.8091	-2.8091	-2.8091	-2.8091	-2.8091	-2.8091	-2.8091	-2.8091	-2.8091	-2.8091	-2.8091	-2.8091
rno-piR-12186	-2.8091	-2.8091	-0.380507	-2.8091	-0.691621	-2.8091	-2.8091	-2.8091	-2.8091	-2.8091	-2.8091	-2.8091	-2.8091	-2.8091	-2.8091	-2.8091	-2.8091	-0.401497	-2.8091	-2.8091	-2.8091	-2.8091	-2.8091	-2.8091
rno-piR-12188	-2.8091	-2.8091	-1.37586	-0.817012	-2.8091	-2.8091	-2.8091	-2.8091	-2.8091	0.960112	-2.8091	-2.8091	-2.8091	-2.8091	-2.8091	-2.8091	-2.8091	-2.8091	-2.8091	0.45269	-2.8091	-2.8091	-2.8091	-2.8091
rno-piR-1219	-2.8091	-2.8091	-1.9595	-2.8091	-2.8091	-2.8091	-2.8091	-2.8091	-2.8091	-2.8091	-2.8091	-2.8091	-2.8091	-2.8091	-2.8091	-2.8091	-2.8091	-2.8091	-2.8091	-2.8091	-2.8091	-2.8091	-2.8091	-2.8091
rno-piR-12190	1.34239	0.520875	1.59878	1.12746	1.68365	1.70704	1.99161	0.646749	2.2881	-0.291042	3.6445	2.03091	0.946182	0.236575	-2.8091	3.08165	0.7614	1.18319	1.72527	3.34571	-2.8091	1.96264	2.82617	2.38734
rno-piR-12191	-2.8091	-2.8091	-1.9595	-2.8091	-2.8091	-2.8091	-2.8091	-2.8091	-2.8091	-2.8091	-2.8091	-2.8091	-2.8091	-2.8091	-2.8091	-2.8091	-2.8091	-2.8091	-2.8091	-2.8091	-2.8091	-2.8091	-2.8091	-2.8091
rno-piR-12192	-2.8091	-2.8091	-1.9595	-2.8091	-2.8091	-2.8091	-2.8091	-2.8091	-2.8091	-2.8091	-2.8091	-2.8091	-2.8091	-2.8091	-2.8091	-2.8091	-2.8091	-2.8091	-2.8091	-2.8091	-2.8091	-2.8091	-2.8091	-2.8091
rno-piR-12193	-0.497571	-0.640445	-0.851482	-2.8091	-2.8091	-2.8091	-2.8091	-2.8091	-2.8091	0.960112	-2.8091	-2.8091	-2.8091	-2.8091	-2.8091	-2.8091	-2.8091	-0.401497	-2.8091	-2.8091	-2.8091	-2.8091	-2.8091	-2.8091
rno-piR-12194	-2.8091	-2.8091	-0.851482	0.627278	-0.691621	-2.8091	-2.8091	0.646749	-2.8091	-2.8091	3.17201	-2.8091	-2.8091	-0.857667	-2.8091	0.370133	-2.8091	-2.8091	-2.8091	1.5964	-2.8091	4.37741	-2.8091	-2.8091
rno-piR-12195	-0.497571	-2.8091	-1.17414	-2.8091	-0.00243066	-2.8091	1.08683	3.85897	-2.8091	-2.8091	-2.8091	-2.8091	-2.8091	0.236575	-2.8091	-2.8091	-2.8091	-2.8091	-2.8091	-2.8091	-2.8091	-2.8091	-2.8091	-2.8091
rno-piR-12196	-2.8091	-2.8091	-2.8091	-2.8091	-0.691621	-2.8091	-2.8091	-2.8091	-2.8091	0.469226	-2.8091	-2.8091	-2.8091	-2.8091	-2.8091	-2.8091	-2.8091	-2.8091	-2.8091	-2.8091	-2.8091	-2.8091	-2.8091	-2.8091
rno-piR-12197	-2.8091	-2.8091	-1.37586	-2.8091	-0.00243066	-2.8091	-2.8091	-2.8091	-2.8091	-2.8091	-2.8091	-2.8091	-2.8091	-0.857667	-2.8091	-2.8091	-2.8091	-2.8091	-2.8091	-2.8091	-2.8091	3.31183	-2.8091	-2.8091
rno-piR-12199	-2.8091	-1.21021	-1.62376	-2.8091	-2.8091	-2.8091	-2.8091	-2.8091	-2.8091	-2.8091	-2.8091	-2.8091	-2.8091	-2.8091	-2.8091	-2.8091	-2.8091	-2.8091	-2.8091	-2.8091	-2.8091	-2.8091	-2.8091	-2.8091
rno-piR-122	-2.8091	-2.8091	-2.8091	-0.817012	-2.8091	-2.8091	-2.8091	-2.8091	-2.8091	-2.8091	-2.8091	-2.8091	-2.8091	-2.8091	-2.8091	-2.8091	-2.8091	-2.8091	-2.8091	-2.8091	-2.8091	-2.8091	-2.8091	-2.8091
rno-piR-12200	-2.8091	-2.8091	-1.62376	-2.8091	-2.8091	-2.8091	-2.8091	-2.8091	-2.8091	-2.8091	-2.8091	-2.8091	-2.8091	-2.8091	-2.8091	-2.8091	-2.8091	-2.8091	-2.8091	-2.8091	-2.8091	-2.8091	-2.8091	-2.8091
rno-piR-12201	-2.8091	-2.8091	-1.9595	-2.8091	-2.8091	-0.403412	-2.8091	-2.8091	-2.8091	-2.8091	-2.8091	-2.8091	-2.8091	-2.8091	-2.8091	-2.8091	-2.8091	-2.8091	-2.8091	-2.8091	-2.8091	-2.8091	-2.8091	-2.8091
rno-piR-12203	-0.497571	-2.8091	-1.62376	0.899196	-0.00243066	-2.8091	-2.8091	-2.8091	6.01627	-2.8091	-2.8091	-2.8091	-2.8091	-0.857667	-2.8091	-2.8091	-2.8091	-2.8091	-2.8091	-2.8091	-2.8091	-2.8091	-2.8091	-2.8091
rno-piR-12204	-2.8091	-1.21021	-2.8091	-2.8091	-0.691621	-2.8091	-2.8091	-2.8091	-2.8091	-2.8091	-2.8091	-2.8091	-2.8091	-2.8091	-2.8091	-2.8091	-2.8091	-2.8091	-2.8091	-2.8091	-2.8091	-2.8091	-2.8091	-2.8091
rno-piR-12205	-2.8091	-2.8091	-0.111754	-2.8091	-2.8091	-2.8091	-2.8091	-2.8091	-2.8091	-2.8091	-2.8091	-2.8091	-2.8091	-2.8091	-2.8091	-2.8091	-0.269622	-2.8091	-2.8091	-2.8091	-2.8091	-2.8091	-2.8091	-2.8091
rno-piR-12208	-2.8091	-2.8091	0.421916	-0.817012	-0.691621	0.338593	-2.8091	-2.8091	-2.8091	-0.291042	-2.8091	-2.8091	-2.8091	-0.857667	-2.8091	-2.8091	-2.8091	-0.401497	-2.8091	-2.8091	-2.8091	-2.8091	-2.8091	-2.8091
rno-piR-12209	-2.8091	-2.8091	-2.8091	-0.817012	-0.691621	-2.8091	-2.8091	-2.8091	-2.8091	-2.8091	-2.8091	-2.8091	-2.8091	-2.8091	-2.8091	-2.8091	-2.8091	-2.8091	-2.8091	-2.8091	-2.8091	-2.8091	-2.8091	-2.8091
rno-piR-12210	-2.8091	-2.8091	-1.00219	-2.8091	-2.8091	-2.8091	-2.8091	-2.8091	-2.8091	-2.8091	-2.8091	-2.8091	-2.8091	-2.8091	-2.8091	-2.8091	-0.912094	-2.8091	-2.8091	-2.8091	-2.8091	-2.8091	-2.8091	-2.8091
rno-piR-12211	-2.8091	-1.21021	-1.9595	-2.8091	-2.8091	-2.8091	-2.8091	-2.8091	-2.8091	-2.8091	-2.8091	-2.8091	-2.8091	-2.8091	-2.8091	-2.8091	-2.8091	-0.401497	-2.8091	-2.8091	-2.8091	-2.8091	-2.8091	2.78304
rno-piR-12214	-2.8091	-2.8091	-1.62376	-2.8091	-0.691621	-2.8091	-2.8091	-2.8091	-2.8091	-2.8091	-2.8091	-2.8091	-2.8091	-2.8091	-2.8091	-2.8091	-0.912094	-2.8091	-2.8091	-2.8091	-2.8091	-2.8091	-2.8091	-2.8091
rno-piR-12215	-2.8091	-2.8091	-2.8091	-2.8091	-0.691621	-2.8091	-2.8091	-2.8091	-2.8091	-2.8091	-2.8091	-2.8091	-2.8091	-2.8091	-2.8091	-2.8091	-2.8091	-2.8091	-2.8091	-2.8091	-2.8091	-2.8091	-2.8091	-2.8091
rno-piR-12216	-0.497571	-2.8091	-1.37586	-2.8091	-2.8091	0.821078	-2.8091	-2.8091	-2.8091	-2.8091	-2.8091	-2.8091	-2.8091	-0.857667	-2.8091	-2.8091	-2.8091	-2.8091	-2.8091	-2.8091	-2.8091	-2.8091	3.39198	-2.8091
rno-piR-12217	-2.8091	-2.8091	-1.62376	-0.817012	-0.691621	-2.8091	-2.8091	-2.8091	-2.8091	-2.8091	-2.8091	-2.8091	-2.8091	-2.8091	-2.8091	-2.8091	-2.8091	-2.8091	-2.8091	-2.8091	-2.8091	-2.8091	-2.8091	-2.8091
rno-piR-12218	-0.497571	-2.8091	-2.8091	-2.8091	-0.691621	-2.8091	1.08683	-2.8091	-2.8091	-2.8091	-2.8091	-2.8091	-2.8091	-0.857667	-2.8091	-2.8091	-2.8091	-2.8091	-2.8091	-2.8091	-2.8091	-2.8091	-2.8091	-2.8091
rno-piR-1222	0.228153	-2.8091	-0.0327353	-0.153685	-0.691621	-0.403412	-2.8091	-2.8091	-2.8091	-2.8091	-2.8091	-2.8091	-2.8091	-2.8091	-2.8091	-2.8091	-2.8091	-0.401497	-2.8091	-2.8091	-2.8091	-2.8091	-2.8091	-2.8091
rno-piR-12220	-0.497571	1.0149	1.80246	0.899196	2.43696	1.91202	-2.8091	-2.8091	-2.8091	-0.291042	1.01527	-2.8091	-2.8091	-0.857667	-2.8091	-2.8091	1.50456	-0.401497	2.6637	3.75072	-2.8091	-2.8091	-2.8091	-2.8091
rno-piR-12221	-2.8091	-2.8091	-1.9595	-2.8091	-2.8091	-2.8091	-2.8091	-2.8091	-2.8091	-2.8091	-2.8091	-2.8091	-2.8091	-2.8091	-2.8091	-2.8091	-2.8091	-2.8091	-2.8091	-2.8091	-2.8091	-2.8091	-2.8091	-2.8091
rno-piR-12224	-2.8091	-2.8091	-2.8091	-2.8091	-2.8091	-2.8091	-2.8091	-2.8091	-2.8091	-2.8091	1.01527	-2.8091	-2.8091	-2.8091	-2.8091	-2.8091	-2.8091	-2.8091	-2.8091	-2.8091	-2.8091	-2.8091	-2.8091	-2.8091
rno-piR-12225	-2.8091	-2.8091	-0.851482	-2.8091	-0.00243066	-2.8091	-2.8091	-2.8091	-2.8091	-2.8091	-2.8091	-2.8091	-2.8091	-2.8091	-2.8091	-2.8091	-2.8091	-0.401497	-2.8091	-2.8091	-2.8091	-2.8091	-2.8091	-2.8091
rno-piR-12226	-2.8091	-2.8091	0.528722	-0.817012	-2.8091	-2.8091	-2.8091	-2.8091	-2.8091	-2.8091	-2.8091	2.03091	-2.8091	-2.8091	-2.8091	-2.8091	-0.912094	-2.8091	0.0317522	-2.8091	-2.8091	-2.8091	-2.8091	-2.8091
rno-piR-12227	-2.8091	-2.8091	-2.8091	-2.8091	-2.8091	-2.8091	-2.8091	-2.8091	-2.8091	-0.291042	-2.8091	-2.8091	-2.8091	-2.8091	-2.8091	-2.8091	-2.8091	-2.8091	-2.8091	-2.8091	-2.8091	-2.8091	-2.8091	-2.8091
rno-piR-12228	-2.8091	-2.8091	-1.9595	-2.8091	-0.691621	-2.8091	-2.8091	-2.8091	-2.8091	-0.291042	-2.8091	-2.8091	-2.8091	-2.8091	-2.8091	-2.8091	-2.8091	-2.8091	-2.8091	3.18077	-2.8091	-2.8091	-2.8091	4.20444
rno-piR-12229	-2.8091	-1.21021	-2.8091	-2.8091	-2.8091	-2.8091	-2.8091	-2.8091	2.2881	-0.291042	-2.8091	-2.8091	-2.8091	-2.8091	-2.8091	0.370133	-2.8091	-2.8091	-2.8091	-2.8091	-2.8091	4.86915	-2.8091	-2.8091
rno-piR-12230	-2.8091	-1.21021	-0.284903	-0.817012	-2.8091	-2.8091	-2.8091	-2.8091	-2.8091	-2.8091	-2.8091	-2.8091	-2.8091	-2.8091	-2.8091	-2.8091	-0.269622	-0.401497	-2.8091	-2.8091	-2.8091	-2.8091	-2.8091	-2.8091
rno-piR-12231	0.702996	-1.21021	0.112934	0.627278	0.79938	-2.8091	-2.8091	-2.8091	-2.8091	-2.8091	-2.8091	-2.8091	-2.8091	0.840636	-2.8091	-2.8091	0.7614	0.340829	0.838007	-2.8091	-2.8091	-2.8091	-2.8091	-2.8091
rno-piR-12232	0.702996	-2.8091	-0.851482	-2.8091	-0.691621	-0.403412	1.08683	-2.8091	-2.8091	-2.8091	-2.8091	-2.8091	-2.8091	-0.203124	-2.8091	-2.8091	-2.8091	-2.8091	1.72527	2.99449	-2.8091	-2.8091	-2.8091	3.34827
rno-piR-12233	-2.8091	-2.8091	-2.8091	-2.8091	-2.8091	0.338593	-2.8091	-2.8091	-2.8091	-2.8091	-2.8091	-2.8091	-2.8091	-2.8091	-2.8091	-2.8091	-2.8091	-2.8091	-2.8091	-2.8091	-2.8091	-2.8091	-2.8091	-2.8091
rno-piR-12234	-2.8091	-2.8091	-1.9595	-2.8091	-2.8091	0.338593	-2.8091	-2.8091	-2.8091	-2.8091	-2.8091	-2.8091	-2.8091	-2.8091	-2.8091	-2.8091	-2.8091	-2.8091	-2.8091	-2.8091	-2.8091	-2.8091	-2.8091	-2.8091
rno-piR-12235	-2.8091	-1.21021	-0.195589	-0.817012	-0.00243066	-0.403412	-2.8091	-2.8091	-2.8091	-2.8091	-2.8091	-2.8091	-2.8091	-0.203124	-2.8091	-2.8091	-2.8091	0.340829	-2.8091	-2.8091	-2.8091	-2.8091	-2.8091	-2.8091
rno-piR-12237	-2.8091	-2.8091	-2.8091	-2.8091	-2.8091	-0.403412	-2.8091	-2.8091	-2.8091	-2.8091	-2.8091	-2.8091	-2.8091	-2.8091	-2.8091	-2.8091	-2.8091	-2.8091	-2.8091	-2.8091	-2.8091	-2.8091	-2.8091	-2.8091
rno-piR-12239	0.228153	-1.21021	0.112934	-0.153685	-2.8091	-2.8091	-2.8091	-2.8091	-2.8091	-2.8091	-2.8091	-2.8091	-2.8091	-0.203124	-2.8091	-2.8091	-2.8091	0.823464	0.0317522	-2.8091	-2.8091	-2.8091	-2.8091	-2.8091
rno-piR-12240	-2.8091	-2.8091	-1.62376	-2.8091	-2.8091	-2.8091	-2.8091	-2.8091	-2.8091	-2.8091	-2.8091	-2.8091	-2.8091	-0.857667	-2.8091	-2.8091	-2.8091	-2.8091	-2.8091	-2.8091	-2.8091	-2.8091	-2.8091	-2.8091
rno-piR-12241	-2.8091	-2.8091	-2.8091	-2.8091	-2.8091	-2.8091	1.08683	-2.8091	-2.8091	-2.8091	-2.8091	-2.8091	-2.8091	-2.8091	-2.8091	-2.8091	-2.8091	-2.8091	-2.8091	0.45269	-2.8091	-2.8091	-2.8091	-2.8091
rno-piR-12242	-0.497571	-2.8091	-0.851482	-2.8091	-2.8091	-2.8091	-2.8091	-2.8091	-2.8091	-2.8091	-2.8091	-2.8091	-2.8091	-2.8091	-2.8091	-2.8091	-2.8091	0.823464	-2.8091	-2.8091	-2.8091	-2.8091	-2.8091	-2.8091
rno-piR-12244	-2.8091	-2.8091	-1.37586	-0.817012	-2.8091	-2.8091	-2.8091	-2.8091	-2.8091	-2.8091	-2.8091	-2.8091	-2.8091	-0.857667	-2.8091	-2.8091	-2.8091	0.340829	-2.8091	-2.8091	-2.8091	-2.8091	-2.8091	-2.8091
rno-piR-12245	-2.8091	-2.8091	-2.8091	-2.8091	-2.8091	-2.8091	1.08683	-2.8091	-2.8091	-2.8091	-2.8091	2.03091	-2.8091	-2.8091	-2.8091	-2.8091	-2.8091	-2.8091	-2.8091	-2.8091	-2.8091	-2.8091	-2.8091	-2.8091
rno-piR-12246	2.51144	-2.8091	-0.380507	-2.8091	-0.00243066	1.18072	-2.8091	-2.8091	-2.8091	2.80006	1.01527	-2.8091	-2.8091	0.570591	-2.8091	-2.8091	-2.8091	-2.8091	1.72527	4.0185	-2.8091	-2.8091	-2.8091	-2.8091
rno-piR-12247	-0.497571	-2.8091	-2.8091	-2.8091	-2.8091	-2.8091	-2.8091	-2.8091	-2.8091	-2.8091	-2.8091	-2.8091	-2.8091	-2.8091	-2.8091	-2.8091	-2.8091	-2.8091	-2.8091	-2.8091	-2.8091	-2.8091	-2.8091	-2.8091
rno-piR-12249	-2.8091	-1.21021	-0.0327353	0.899196	0.454729	-2.8091	-2.8091	-2.8091	-2.8091	-2.8091	-2.8091	-2.8091	-2.8091	-0.857667	-2.8091	-2.8091	-0.912094	-0.401497	-2.8091	2.22447	-2.8091	-2.8091	-2.8091	-2.8091
rno-piR-1225	-2.8091	-2.8091	-1.9595	-2.8091	-2.8091	-2.8091	-2.8091	-2.8091	-2.8091	-2.8091	-2.8091	-2.8091	-2.8091	-2.8091	-2.8091	-2.8091	-2.8091	-2.8091	0.838007	-2.8091	-2.8091	0.563112	-2.8091	-2.8091
rno-piR-12250	-2.8091	-2.8091	-2.8091	-2.8091	-2.8091	-2.8091	-2.8091	-2.8091	-2.8091	-2.8091	-2.8091	-2.8091	-2.8091	-0.857667	-2.8091	-2.8091	-2.8091	-2.8091	-2.8091	-2.8091	-2.8091	-2.8091	-2.8091	-2.8091
rno-piR-12251	0.702996	-2.8091	-1.62376	-2.8091	-2.8091	-2.8091	-2.8091	-2.8091	-2.8091	-2.8091	-2.8091	-2.8091	-2.8091	-2.8091	-2.8091	0.370133	-2.8091	-0.401497	-2.8091	-2.8091	-2.8091	-2.8091	-2.8091	-2.8091
rno-piR-12252	0.702996	-2.8091	-2.8091	-2.8091	-2.8091	-2.8091	-2.8091	-2.8091	-2.8091	-2.8091	-2.8091	-2.8091	-2.8091	-2.8091	-2.8091	-2.8091	-2.8091	-2.8091	-2.8091	-2.8091	-2.8091	-2.8091	-2.8091	-2.8091
rno-piR-12253	-0.497571	0.308753	0.36532	0.899196	0.454729	-2.8091	-2.8091	-2.8091	-2.8091	-2.8091	-2.8091	-2.8091	-2.8091	-0.203124	-2.8091	-2.8091	-0.269622	0.823464	0.838007	-2.8091	-2.8091	-2.8091	-2.8091	-2.8091
rno-piR-12254	-2.8091	-2.8091	-1.62376	-2.8091	-2.8091	-0.403412	-2.8091	0.646749	-2.8091	-2.8091	-2.8091	-2.8091	-2.8091	-2.8091	-2.8091	-2.8091	-2.8091	-2.8091	-2.8091	2.04396	-2.8091	-2.8091	-2.8091	-2.8091
rno-piR-12255	-0.497571	-0.640445	0.476328	0.290504	1.07661	-0.403412	-2.8091	-2.8091	-2.8091	-2.8091	-2.8091	-2.8091	-2.8091	-0.857667	-2.8091	-2.8091	0.163835	-0.401497	0.0317522	3.96878	-2.8091	-2.8091	-2.8091	-2.8091
rno-piR-12256	-0.497571	-2.8091	-0.0327353	-2.8091	-0.691621	-2.8091	-2.8091	-2.8091	-2.8091	-2.8091	-2.8091	-2.8091	-2.8091	-2.8091	-2.8091	-2.8091	-2.8091	-2.8091	0.0317522	-2.8091	-2.8091	1.42735	-2.8091	-2.8091
rno-piR-12257	-2.8091	-1.21021	-1.37586	-2.8091	-2.8091	-2.8091	-2.8091	-2.8091	-2.8091	-2.8091	-2.8091	-2.8091	-2.8091	-2.8091	-2.8091	-2.8091	-2.8091	-2.8091	-2.8091	-2.8091	-2.8091	-2.8091	-2.8091	-2.8091
rno-piR-12258	0.702996	-1.21021	0.306354	2.24327	1.30869	1.18072	1.08683	-2.8091	-2.8091	1.32461	-2.8091	5.74341	-2.8091	-0.857667	-2.8091	-2.8091	-0.269622	-2.8091	1.34924	2.52915	-2.8091	0.563112	-2.8091	3.75329
rno-piR-12259	-2.8091	-2.8091	-1.9595	-2.8091	-2.8091	-2.8091	-2.8091	-2.8091	-2.8091	-2.8091	-2.8091	-2.8091	-2.8091	-2.8091	-2.8091	-2.8091	-2.8091	-2.8091	-2.8091	-2.8091	-2.8091	-2.8091	-2.8091	-2.8091
rno-piR-12260	1.05817	-0.640445	-1.17414	1.32426	0.454729	0.338593	2.54268	-2.8091	-2.8091	-0.291042	1.9153	4.27168	-2.8091	-2.8091	-2.8091	-2.8091	-0.269622	-2.8091	0.838007	3.09063	-2.8091	0.563112	4.11334	-2.8091
rno-piR-12261	-2.8091	-2.8091	-2.8091	-2.8091	-2.8091	-2.8091	-2.8091	-2.8091	-2.8091	-0.291042	-2.8091	-2.8091	-2.8091	-2.8091	-2.8091	-2.8091	-2.8091	-2.8091	-2.8091	-2.8091	-2.8091	-2.8091	-2.8091	-2.8091
rno-piR-12263	-2.8091	-2.8091	-1.37586	-2.8091	-2.8091	-2.8091	-2.8091	-2.8091	-2.8091	-2.8091	-2.8091	-2.8091	-2.8091	-0.203124	-2.8091	-2.8091	-0.912094	-2.8091	-2.8091	-2.8091	-2.8091	-2.8091	-2.8091	-2.8091
rno-piR-12266	-2.8091	-2.8091	-2.8091	-0.817012	-2.8091	-2.8091	-2.8091	-2.8091	-2.8091	-2.8091	-2.8091	-2.8091	-2.8091	-2.8091	-2.8091	-2.8091	-2.8091	-2.8091	-2.8091	-2.8091	-2.8091	-2.8091	-2.8091	-2.8091
rno-piR-12269	-0.497571	-2.8091	-0.594968	-2.8091	-2.8091	0.338593	-2.8091	-2.8091	-2.8091	-0.291042	2.46457	-2.8091	-2.8091	0.570591	-2.8091	-2.8091	-0.912094	-2.8091	-2.8091	-2.8091	-2.8091	-2.8091	-2.8091	-2.8091
rno-piR-1227	-2.8091	-2.8091	-2.8091	-2.8091	-2.8091	-2.8091	-2.8091	-2.8091	-2.8091	-2.8091	-2.8091	-2.8091	-2.8091	-2.8091	-2.8091	-2.8091	-2.8091	-2.8091	0.0317522	-2.8091	-2.8091	-2.8091	-2.8091	-2.8091
rno-piR-12271	-2.8091	-2.8091	-2.8091	-2.8091	-2.8091	-2.8091	-2.8091	-2.8091	-2.8091	-2.8091	-2.8091	-2.8091	-2.8091	-2.8091	-2.8091	-2.8091	-2.8091	0.340829	-2.8091	-2.8091	-2.8091	-2.8091	-2.8091	-2.8091
rno-piR-12272	-2.8091	-2.8091	-2.8091	-2.8091	-2.8091	-2.8091	-2.8091	-2.8091	-2.8091	-2.8091	-2.8091	-2.8091	-2.8091	-2.8091	-2.8091	-2.8091	-2.8091	-2.8091	-2.8091	2.38485	-2.8091	-2.8091	-2.8091	-2.8091
rno-piR-12274	-2.8091	-2.8091	-1.62376	-2.8091	-2.8091	-2.8091	-2.8091	-2.8091	-2.8091	-2.8091	-2.8091	-2.8091	-2.8091	-2.8091	-2.8091	-2.8091	-2.8091	-2.8091	-2.8091	-2.8091	-2.8091	-2.8091	-2.8091	-2.8091
rno-piR-12277	-0.497571	-0.246323	-0.195589	0.627278	1.07661	-2.8091	-2.8091	-2.8091	-2.8091	-0.291042	-2.8091	-2.8091	-2.8091	0.236575	-2.8091	-2.8091	0.493989	-0.401497	1.34924	0.942549	-2.8091	-2.8091	-2.8091	-2.8091
rno-piR-12280	-2.8091	-2.8091	-1.62376	-2.8091	-2.8091	-2.8091	-2.8091	-2.8091	-2.8091	-2.8091	-2.8091	-2.8091	-2.8091	-0.857667	-2.8091	-2.8091	-2.8091	-2.8091	-2.8091	-2.8091	-2.8091	-2.8091	-2.8091	-2.8091
rno-piR-12281	0.228153	0.308753	0.765054	1.65165	-0.00243066	0.821078	3.72484	-2.8091	-2.8091	1.85633	-2.8091	-2.8091	-2.8091	0.236575	-2.8091	-2.8091	0.163835	-2.8091	1.72527	2.04396	9.65593	-2.8091	-2.8091	-2.8091
rno-piR-12283	-2.8091	-2.8091	-1.9595	-2.8091	-0.691621	-2.8091	-2.8091	0.646749	3.81687	-2.8091	-2.8091	-2.8091	-2.8091	-0.857667	-2.8091	-2.8091	-2.8091	-0.401497	0.0317522	-2.8091	-2.8091	3.4772	-2.8091	-2.8091
rno-piR-12284	-2.8091	-2.8091	-2.8091	-2.8091	-2.8091	-2.8091	-2.8091	-2.8091	-2.8091	-2.8091	-2.8091	-2.8091	-2.8091	-2.8091	-2.8091	0.370133	-2.8091	-2.8091	-2.8091	-2.8091	-2.8091	-2.8091	-2.8091	-2.8091
rno-piR-12286	-2.8091	-2.8091	-0.483425	-0.153685	0.454729	0.338593	1.08683	-2.8091	-2.8091	-2.8091	1.01527	2.03091	-2.8091	-2.8091	-2.8091	-2.8091	-2.8091	1.18319	-2.8091	2.38485	-2.8091	-2.8091	-2.8091	-2.8091
rno-piR-1229	-0.497571	-2.8091	-1.37586	-2.8091	-2.8091	-0.403412	3.72484	-2.8091	-2.8091	-2.8091	-2.8091	-2.8091	-2.8091	0.236575	-2.8091	-2.8091	-2.8091	-2.8091	-2.8091	-2.8091	-2.8091	-2.8091	-2.8091	-2.8091
rno-piR-12290	0.702996	-1.21021	0.476328	-0.817012	-0.691621	1.91202	-2.8091	-2.8091	-2.8091	-2.8091	-2.8091	-2.8091	-2.8091	1.26331	-2.8091	-2.8091	-0.912094	0.340829	-2.8091	-2.8091	-2.8091	-2.8091	-2.8091	-2.8091
rno-piR-12291	-2.8091	-2.8091	-0.851482	-0.817012	-0.691621	-0.403412	-2.8091	-2.8091	-2.8091	-0.291042	3.17201	-2.8091	-2.8091	-2.8091	-2.8091	-2.8091	-2.8091	-2.8091	2.48009	0.942549	-2.8091	0.563112	-2.8091	-2.8091
rno-piR-12293	-2.8091	-2.8091	-1.9595	-2.8091	-2.8091	-2.8091	-2.8091	-2.8091	-2.8091	-2.8091	-2.8091	-2.8091	-2.8091	-2.8091	-2.8091	-2.8091	-2.8091	-2.8091	-2.8091	-2.8091	-2.8091	-2.8091	-2.8091	-2.8091
rno-piR-12295	-2.8091	-2.8091	-2.8091	-0.817012	-2.8091	0.338593	-2.8091	-2.8091	-2.8091	-2.8091	-2.8091	-2.8091	-2.8091	-2.8091	-2.8091	-2.8091	-2.8091	-2.8091	-2.8091	-2.8091	-2.8091	-2.8091	-2.8091	-2.8091
rno-piR-12298	-2.8091	-1.21021	-0.851482	-2.8091	-0.691621	-2.8091	-2.8091	-2.8091	-2.8091	-2.8091	-2.8091	-2.8091	-2.8091	-0.203124	-2.8091	-2.8091	-0.912094	-2.8091	-2.8091	-2.8091	-2.8091	-2.8091	-2.8091	-2.8091
rno-piR-123	-2.8091	-2.8091	-2.8091	-2.8091	-2.8091	-2.8091	-2.8091	-2.8091	-2.8091	-2.8091	-2.8091	5.39758	-2.8091	-2.8091	-2.8091	-2.8091	-2.8091	-2.8091	-2.8091	-2.8091	-2.8091	-2.8091	-2.8091	-2.8091
rno-piR-1230	1.96108	0.0587823	2.12271	2.03484	0.79938	1.70704	1.99161	-2.8091	2.2881	-0.291042	3.99981	-2.8091	-2.8091	0.236575	6.20978	4.4439	1.88445	-2.8091	0.0317522	-2.8091	-2.8091	2.65797	-2.8091	2.38734
rno-piR-12301	-2.8091	-0.640445	-1.9595	-2.8091	-2.8091	-2.8091	-2.8091	-2.8091	-2.8091	-2.8091	-2.8091	3.54872	-2.8091	-2.8091	-2.8091	-2.8091	-2.8091	-2.8091	-2.8091	-2.8091	-2.8091	-2.8091	-2.8091	-2.8091
rno-piR-12303	-2.8091	-1.21021	-1.00219	-2.8091	-2.8091	-2.8091	-2.8091	-2.8091	-2.8091	-2.8091	-2.8091	-2.8091	-2.8091	-2.8091	-2.8091	-2.8091	-2.8091	-2.8091	-2.8091	-2.8091	-2.8091	-2.8091	-2.8091	-2.8091
rno-piR-12304	-2.8091	-0.640445	0.180423	-0.153685	-2.8091	0.821078	-2.8091	-2.8091	-2.8091	-2.8091	-2.8091	-2.8091	-2.8091	-2.8091	-2.8091	-2.8091	-0.269622	-0.401497	-2.8091	-2.8091	-2.8091	-2.8091	-2.8091	-2.8091
rno-piR-12305	-2.8091	-1.21021	-0.851482	-2.8091	-0.691621	-2.8091	-2.8091	-2.8091	-2.8091	1.32461	-2.8091	2.03091	-2.8091	-0.857667	-2.8091	-2.8091	-0.912094	-2.8091	0.838007	-2.8091	-2.8091	-2.8091	-2.8091	-2.8091
rno-piR-12306	-2.8091	-2.8091	-1.9595	-2.8091	-2.8091	-2.8091	-2.8091	-2.8091	-2.8091	-2.8091	-2.8091	-2.8091	-2.8091	-0.857667	-2.8091	-2.8091	-2.8091	-2.8091	-2.8091	-2.8091	-2.8091	-2.8091	-2.8091	-2.8091
rno-piR-1231	-2.8091	-1.21021	-2.8091	-2.8091	-0.691621	-2.8091	-2.8091	-2.8091	-2.8091	-2.8091	-2.8091	-2.8091	-2.8091	0.236575	-2.8091	-2.8091	-2.8091	0.340829	-2.8091	-2.8091	-2.8091	-2.8091	-2.8091	-2.8091
rno-piR-12310	-2.8091	-2.8091	-1.9595	-2.8091	-2.8091	-0.403412	-2.8091	-2.8091	-2.8091	-2.8091	-2.8091	-2.8091	-2.8091	-2.8091	-2.8091	-2.8091	-2.8091	-2.8091	-2.8091	-2.8091	-2.8091	-2.8091	-2.8091	-2.8091
rno-piR-12312	-2.8091	-2.8091	-1.62376	-0.153685	-2.8091	-2.8091	-2.8091	-2.8091	-2.8091	-2.8091	-2.8091	-2.8091	-2.8091	-2.8091	-2.8091	-2.8091	-2.8091	-2.8091	-2.8091	-2.8091	-2.8091	-2.8091	-2.8091	-2.8091
rno-piR-12313	-2.8091	-2.8091	-2.8091	-2.8091	-2.8091	-2.8091	-2.8091	-2.8091	-2.8091	-2.8091	-2.8091	-2.8091	-2.8091	-2.8091	-2.8091	-2.8091	-2.8091	-2.8091	-2.8091	3.42161	-2.8091	-2.8091	-2.8091	-2.8091
rno-piR-12314	-2.8091	-0.640445	-0.0327353	-0.817012	1.07661	-2.8091	-2.8091	-2.8091	-2.8091	-2.8091	-2.8091	-2.8091	-2.8091	-2.8091	-2.8091	-2.8091	-0.912094	0.823464	-2.8091	-2.8091	-2.8091	-2.8091	-2.8091	-2.8091
rno-piR-12315	-2.8091	-2.8091	-1.37586	-2.8091	-2.8091	-2.8091	-2.8091	-2.8091	-2.8091	-2.8091	-2.8091	-2.8091	-2.8091	-2.8091	-2.8091	-2.8091	-2.8091	-2.8091	-2.8091	-2.8091	-2.8091	-2.8091	-2.8091	-2.8091
rno-piR-12317	-2.8091	-2.8091	-1.37586	-2.8091	-0.691621	0.338593	-2.8091	-2.8091	-2.8091	-2.8091	3.6445	-2.8091	-2.8091	-0.203124	-2.8091	-2.8091	0.493989	-2.8091	1.72527	-2.8091	-2.8091	-2.8091	-2.8091	-2.8091
rno-piR-12319	-2.8091	-2.8091	-2.8091	-0.153685	-2.8091	-2.8091	-2.8091	-2.8091	-2.8091	-2.8091	-2.8091	-2.8091	-2.8091	-2.8091	-2.8091	-2.8091	-0.912094	-2.8091	-2.8091	-2.8091	-2.8091	-2.8091	-2.8091	-2.8091
rno-piR-12320	1.05817	0.0587823	0.476328	2.03484	0.454729	0.821078	2.94032	3.22282	-2.8091	-0.291042	-2.8091	4.94179	-2.8091	0.236575	-2.8091	-2.8091	0.163835	1.70961	1.34924	5.00583	-2.8091	0.563112	-2.8091	-2.8091
rno-piR-12321	-2.8091	-2.8091	-1.17414	-0.153685	-2.8091	-0.403412	-2.8091	-2.8091	-2.8091	-2.8091	-2.8091	-2.8091	-2.8091	-0.203124	-2.8091	-2.8091	-2.8091	-0.401497	0.0317522	-2.8091	-2.8091	0.563112	-2.8091	-2.8091
rno-piR-12322	1.57947	0.868485	0.306354	1.79104	1.50838	-2.8091	1.99161	-2.8091	2.2881	-2.8091	-2.8091	-2.8091	-2.8091	0.236575	-2.8091	-2.8091	-0.912094	0.823464	2.82654	-2.8091	-2.8091	4.29117	-2.8091	-2.8091
rno-piR-12323	-2.8091	-2.8091	-1.9595	-2.8091	-2.8091	0.338593	-2.8091	-2.8091	-2.8091	-2.8091	1.01527	-2.8091	-2.8091	-2.8091	-2.8091	-2.8091	-2.8091	-2.8091	-2.8091	-2.8091	-2.8091	-2.8091	-2.8091	-2.8091
rno-piR-12324	-2.8091	-2.8091	-1.37586	-0.817012	-2.8091	-2.8091	-2.8091	-2.8091	-2.8091	-2.8091	1.01527	-2.8091	-2.8091	-2.8091	-2.8091	-2.8091	-2.8091	-2.8091	0.0317522	-2.8091	-2.8091	-2.8091	-2.8091	-2.8091
rno-piR-12325	-2.8091	-2.8091	-1.62376	-0.153685	-2.8091	-2.8091	1.08683	-2.8091	-2.8091	-2.8091	-2.8091	-2.8091	-2.8091	-2.8091	-2.8091	-2.8091	-0.912094	-2.8091	-2.8091	-2.8091	-2.8091	1.42735	-2.8091	-2.8091
rno-piR-12327	-0.497571	0.705286	2.7873	1.79104	3.63039	0.338593	-2.8091	0.646749	-2.8091	-0.291042	-2.8091	-2.8091	-2.8091	2.36045	-2.8091	0.370133	2.94035	0.823464	0.0317522	-2.8091	-2.8091	0.563112	-2.8091	-2.8091
rno-piR-12328	-0.497571	-1.21021	-0.851482	-0.817012	-0.691621	-2.8091	-2.8091	-2.8091	-2.8091	-2.8091	-2.8091	-2.8091	-2.8091	-2.8091	-2.8091	-2.8091	-2.8091	-2.8091	1.34924	-2.8091	-2.8091	-2.8091	-2.8091	-2.8091
rno-piR-12329	-2.8091	-2.8091	0.967651	-2.8091	-0.691621	-2.8091	-2.8091	-2.8091	-2.8091	-2.8091	-2.8091	-2.8091	-2.8091	0.840636	-2.8091	-2.8091	-0.269622	-0.401497	0.838007	-2.8091	-2.8091	-2.8091	-2.8091	-2.8091
rno-piR-1233	-2.8091	-2.8091	-2.8091	-2.8091	-0.691621	-2.8091	-2.8091	-2.8091	-2.8091	-2.8091	-2.8091	-2.8091	-2.8091	-2.8091	-2.8091	-2.8091	-2.8091	-2.8091	-2.8091	-2.8091	-2.8091	-2.8091	-2.8091	-2.8091
rno-piR-12331	-2.8091	-2.8091	-2.8091	-2.8091	-2.8091	-2.8091	-2.8091	-2.8091	-2.8091	-2.8091	-2.8091	-2.8091	-2.8091	-0.857667	-2.8091	-2.8091	-0.912094	-2.8091	-2.8091	-2.8091	-2.8091	-2.8091	-2.8091	-2.8091
rno-piR-12334	-2.8091	-1.21021	-1.9595	-2.8091	-2.8091	-2.8091	-2.8091	-2.8091	-2.8091	-2.8091	-2.8091	-2.8091	-2.8091	-2.8091	-2.8091	-2.8091	-2.8091	-2.8091	-2.8091	-2.8091	-2.8091	-2.8091	-2.8091	-2.8091
rno-piR-12335	-0.497571	-0.246323	-0.111754	-2.8091	0.454729	1.18072	-2.8091	-2.8091	-2.8091	-2.8091	3.99981	-2.8091	-2.8091	0.570591	-2.8091	-2.8091	-0.269622	-2.8091	0.0317522	-2.8091	-2.8091	-2.8091	-2.8091	-2.8091
rno-piR-12336	-2.8091	-2.8091	0.0420094	-0.817012	-0.00243066	1.18072	-2.8091	-2.8091	-2.8091	0.469226	-2.8091	-2.8091	-2.8091	-0.203124	-2.8091	-2.8091	-0.912094	-2.8091	0.838007	2.66031	-2.8091	-2.8091	-2.8091	-2.8091
rno-piR-12337	-2.8091	-2.8091	-1.37586	-2.8091	-2.8091	-2.8091	-2.8091	-2.8091	-2.8091	-2.8091	-2.8091	-2.8091	-2.8091	-2.8091	-2.8091	-2.8091	-2.8091	-2.8091	-2.8091	-2.8091	-2.8091	-2.8091	-2.8091	-2.8091
rno-piR-12338	-2.8091	-2.8091	-1.17414	-2.8091	-2.8091	-0.403412	-2.8091	-2.8091	-2.8091	-2.8091	-2.8091	-2.8091	-2.8091	-2.8091	-2.8091	-2.8091	-2.8091	-0.401497	-2.8091	-2.8091	-2.8091	-2.8091	-2.8091	-2.8091
rno-piR-12340	0.228153	-0.640445	0.112934	1.12746	-0.00243066	0.821078	1.08683	-2.8091	-2.8091	-2.8091	-2.8091	4.53119	-2.8091	-0.857667	-2.8091	-2.8091	-0.269622	-2.8091	-2.8091	-2.8091	-2.8091	-2.8091	1.88149	-2.8091
rno-piR-12341	0.228153	1.0149	2.76584	2.03484	2.53155	2.39445	-2.8091	-2.8091	-2.8091	-2.8091	-2.8091	-2.8091	-2.8091	2.07872	-2.8091	3.39396	1.1807	3.13079	0.838007	-2.8091	-2.8091	1.96264	-2.8091	-2.8091
rno-piR-12342	-2.8091	-2.8091	-1.9595	-2.8091	-0.691621	-2.8091	-2.8091	-2.8091	-2.8091	-0.291042	-2.8091	-2.8091	-2.8091	-2.8091	-2.8091	-2.8091	-0.269622	-2.8091	-2.8091	3.09063	-2.8091	-2.8091	-2.8091	-2.8091
rno-piR-12343	0.228153	-1.21021	0.579244	-2.8091	0.79938	1.46788	1.99161	-2.8091	-2.8091	-2.8091	1.9153	-2.8091	-2.8091	1.06754	-2.8091	-2.8091	-2.8091	-2.8091	0.838007	-2.8091	-2.8091	-2.8091	-2.8091	-2.8091
rno-piR-12344	-2.8091	-0.640445	-1.17414	-2.8091	-0.691621	-2.8091	-2.8091	0.646749	-2.8091	-2.8091	-2.8091	-2.8091	-2.8091	-0.857667	-2.8091	-2.8091	-2.8091	-2.8091	-2.8091	3.2656	-2.8091	-2.8091	-2.8091	-2.8091
rno-piR-12345	-2.8091	-2.8091	-2.8091	-2.8091	-2.8091	-2.8091	-2.8091	-2.8091	-2.8091	-2.8091	-2.8091	-2.8091	-2.8091	-2.8091	-2.8091	-2.8091	-0.912094	-2.8091	-2.8091	-2.8091	-2.8091	-2.8091	-2.8091	-2.8091
rno-piR-12346	-2.8091	-2.8091	-2.8091	-2.8091	-2.8091	-2.8091	-2.8091	-2.8091	-2.8091	-2.8091	1.01527	-2.8091	-2.8091	-2.8091	-2.8091	-2.8091	-2.8091	-2.8091	-2.8091	-2.8091	-2.8091	-2.8091	-2.8091	-2.8091
rno-piR-12347	-2.8091	-0.640445	-2.8091	-2.8091	-0.691621	-0.403412	-2.8091	-2.8091	-2.8091	-2.8091	-2.8091	2.03091	-2.8091	-2.8091	-2.8091	-2.8091	-2.8091	0.340829	0.0317522	-2.8091	-2.8091	-2.8091	-2.8091	-2.8091
rno-piR-12348	1.05817	-2.8091	-1.62376	-2.8091	-2.8091	-2.8091	-2.8091	-2.8091	-2.8091	-2.8091	-2.8091	-2.8091	-2.8091	-0.857667	-2.8091	-2.8091	-0.912094	-2.8091	-2.8091	-2.8091	-2.8091	-2.8091	-2.8091	-2.8091
rno-piR-12349	-2.8091	-2.8091	-1.9595	-2.8091	-2.8091	-2.8091	-2.8091	-2.8091	-2.8091	-2.8091	-2.8091	-2.8091	-2.8091	-0.203124	-2.8091	-2.8091	-2.8091	-2.8091	-2.8091	-2.8091	-2.8091	-2.8091	-2.8091	-2.8091
rno-piR-12350	-2.8091	-2.8091	-2.8091	-2.8091	-2.8091	-2.8091	-2.8091	-2.8091	-2.8091	-2.8091	5.3378	-2.8091	-2.8091	-2.8091	-2.8091	-2.8091	-2.8091	-2.8091	-2.8091	-2.8091	-2.8091	-2.8091	-2.8091	-2.8091
rno-piR-12352	-2.8091	-2.8091	-2.8091	-2.8091	-2.8091	-2.8091	-2.8091	-2.8091	-2.8091	-0.291042	3.6445	-2.8091	-2.8091	-2.8091	-2.8091	-2.8091	-2.8091	-2.8091	-2.8091	-2.8091	-2.8091	-2.8091	-2.8091	-2.8091
rno-piR-12353	-0.497571	0.0587823	0.765054	1.12746	0.79938	1.18072	1.08683	-2.8091	-2.8091	-0.291042	-2.8091	-2.8091	-2.8091	1.06754	-2.8091	5.21364	0.163835	-2.8091	1.72527	3.09063	-2.8091	-2.8091	-2.8091	-2.8091
rno-piR-12354	-2.8091	-2.8091	-0.851482	-2.8091	-2.8091	-2.8091	-2.8091	-2.8091	-2.8091	-2.8091	-2.8091	-2.8091	-2.8091	-2.8091	-2.8091	-2.8091	-2.8091	-0.401497	-2.8091	-2.8091	-2.8091	-2.8091	-2.8091	-2.8091
rno-piR-12355	-2.8091	-2.8091	-2.8091	-2.8091	-2.8091	-2.8091	-2.8091	-2.8091	-2.8091	-2.8091	-2.8091	-2.8091	-2.8091	-0.857667	-2.8091	-2.8091	-2.8091	-2.8091	-2.8091	-2.8091	-2.8091	-2.8091	-2.8091	-2.8091
rno-piR-12356	0.702996	-0.640445	0.244802	-0.817012	-0.00243066	0.821078	-2.8091	-2.8091	-2.8091	-2.8091	-2.8091	-2.8091	-2.8091	0.236575	-2.8091	-2.8091	-0.269622	0.340829	0.838007	3.8084	-2.8091	-2.8091	-2.8091	-2.8091
rno-piR-12357	0.228153	-2.8091	-0.716865	-0.817012	-2.8091	-2.8091	-2.8091	-2.8091	-2.8091	-2.8091	-2.8091	-2.8091	-2.8091	-2.8091	-2.8091	-2.8091	-0.912094	-2.8091	-2.8091	2.04396	-2.8091	-2.8091	-2.8091	-2.8091
rno-piR-1236	-2.8091	-1.21021	-1.9595	-2.8091	-2.8091	-2.8091	-2.8091	-2.8091	-2.8091	-2.8091	-2.8091	-2.8091	-2.8091	-2.8091	-2.8091	-2.8091	-2.8091	-2.8091	-2.8091	-2.8091	-2.8091	2.35186	-2.8091	-2.8091
rno-piR-12360	-2.8091	-2.8091	-1.62376	-2.8091	-2.8091	-2.8091	-2.8091	-2.8091	-2.8091	-2.8091	-2.8091	-2.8091	-2.8091	-2.8091	-2.8091	-2.8091	-2.8091	-2.8091	-2.8091	-2.8091	-2.8091	-2.8091	-2.8091	-2.8091
rno-piR-12362	1.34239	-2.8091	0.476328	-0.153685	0.79938	0.821078	1.08683	0.646749	-2.8091	0.960112	-2.8091	-2.8091	-2.8091	-2.8091	-2.8091	-2.8091	-0.912094	0.340829	0.838007	2.38485	-2.8091	-2.8091	4.11334	-2.8091
rno-piR-12364	-2.8091	-1.21021	-0.851482	-2.8091	-2.8091	-2.8091	-2.8091	-2.8091	-2.8091	-2.8091	-2.8091	-2.8091	-2.8091	-2.8091	-2.8091	-2.8091	-2.8091	-0.401497	0.0317522	-2.8091	-2.8091	-2.8091	-2.8091	-2.8091
rno-piR-12365	-2.8091	-1.21021	-0.0327353	-2.8091	-0.00243066	-2.8091	-2.8091	-2.8091	-2.8091	-2.8091	-2.8091	-2.8091	-2.8091	-0.857667	-2.8091	-2.8091	-2.8091	-0.401497	-2.8091	-2.8091	-2.8091	-2.8091	-2.8091	-2.8091
rno-piR-12367	0.702996	-2.8091	-0.380507	-0.153685	0.454729	0.338593	1.08683	-2.8091	-2.8091	-2.8091	-2.8091	-2.8091	-2.8091	-2.8091	-2.8091	-2.8091	-0.912094	-2.8091	0.838007	3.34571	-2.8091	-2.8091	-2.8091	-2.8091
rno-piR-12368	-2.8091	-2.8091	-0.483425	-0.153685	-0.691621	1.46788	-2.8091	-2.8091	-2.8091	1.32461	-2.8091	6.63295	-2.8091	-0.203124	-2.8091	-2.8091	-0.912094	-0.401497	0.838007	-2.8091	-2.8091	-2.8091	-2.8091	-2.8091
rno-piR-12369	0.228153	-1.21021	0.36532	-0.153685	0.454729	1.18072	4.6036	3.22282	3.81687	3.11033	4.90527	4.75105	-2.8091	0.570591	-2.8091	-2.8091	0.163835	-0.401497	1.72527	2.52915	6.94257	2.35186	-2.8091	-2.8091
rno-piR-12370	-2.8091	-1.21021	0.421916	-2.8091	0.79938	-0.403412	-2.8091	2.05668	-2.8091	-2.8091	-2.8091	-2.8091	-2.8091	1.26331	-2.8091	-2.8091	-0.912094	-0.401497	0.838007	-2.8091	-2.8091	-2.8091	-2.8091	-2.8091
rno-piR-12371	-2.8091	-2.8091	-1.00219	-2.8091	-2.8091	-2.8091	-2.8091	-2.8091	-2.8091	-2.8091	-2.8091	-2.8091	-2.8091	-0.203124	-2.8091	-2.8091	-0.912094	-2.8091	0.0317522	-2.8091	-2.8091	-2.8091	-2.8091	-2.8091
rno-piR-12372	-2.8091	-2.8091	-1.17414	-2.8091	-2.8091	-0.403412	-2.8091	-2.8091	-2.8091	-2.8091	-2.8091	-2.8091	-2.8091	-0.857667	-2.8091	-2.8091	-2.8091	-2.8091	-2.8091	1.30646	-2.8091	-2.8091	-2.8091	-2.8091
rno-piR-12373	-2.8091	-2.8091	-0.716865	-2.8091	-0.691621	-2.8091	-2.8091	-2.8091	-2.8091	-2.8091	-2.8091	-2.8091	-2.8091	-2.8091	-2.8091	-2.8091	-0.269622	0.340829	-2.8091	-2.8091	-2.8091	-2.8091	-2.8091	-2.8091
rno-piR-12374	-2.8091	-2.8091	-1.9595	-2.8091	-2.8091	-2.8091	-2.8091	-2.8091	-2.8091	-2.8091	-2.8091	-2.8091	-2.8091	-2.8091	-2.8091	-2.8091	-2.8091	-2.8091	-2.8091	-2.8091	-2.8091	-2.8091	-2.8091	-2.8091
rno-piR-12375	-2.8091	-2.8091	-2.8091	-2.8091	-2.8091	-2.8091	-2.8091	-2.8091	-2.8091	-2.8091	-2.8091	-2.8091	-2.8091	-0.857667	-2.8091	-2.8091	-2.8091	-2.8091	-2.8091	-2.8091	-2.8091	-2.8091	-2.8091	-2.8091
rno-piR-12377	0.702996	-0.640445	0.476328	0.290504	0.454729	1.70704	1.99161	-2.8091	-2.8091	-2.8091	-2.8091	-2.8091	-2.8091	-0.203124	-2.8091	-2.8091	0.163835	-0.401497	-2.8091	2.04396	-2.8091	3.31183	-2.8091	-2.8091
rno-piR-12379	-2.8091	-1.21021	-1.9595	-2.8091	-2.8091	-2.8091	-2.8091	-2.8091	-2.8091	-2.8091	-2.8091	-2.8091	-2.8091	-2.8091	-2.8091	-2.8091	-0.912094	-2.8091	-2.8091	-2.8091	-2.8091	-2.8091	-2.8091	-2.8091
rno-piR-1238	-2.8091	-2.8091	-1.62376	-2.8091	-2.8091	-2.8091	-2.8091	-2.8091	-2.8091	-2.8091	-2.8091	-2.8091	-2.8091	-2.8091	-2.8091	-2.8091	-2.8091	-2.8091	-2.8091	-2.8091	-2.8091	-2.8091	-2.8091	-2.8091
rno-piR-12380	-2.8091	-2.8091	-1.17414	-2.8091	-2.8091	-2.8091	-2.8091	-2.8091	-2.8091	0.960112	-2.8091	-2.8091	-2.8091	-2.8091	-2.8091	-2.8091	-2.8091	-2.8091	-2.8091	-2.8091	-2.8091	-2.8091	-2.8091	-2.8091
rno-piR-12381	-2.8091	-2.8091	-2.8091	-2.8091	-2.8091	-2.8091	-2.8091	-2.8091	-2.8091	-2.8091	-2.8091	-2.8091	-2.8091	-2.8091	-2.8091	-2.8091	-2.8091	-2.8091	0.838007	-2.8091	-2.8091	-2.8091	-2.8091	-2.8091
rno-piR-12382	-2.8091	-2.8091	0.84958	-0.817012	-2.8091	-2.8091	-2.8091	-2.8091	-2.8091	-2.8091	-2.8091	-2.8091	-2.8091	-2.8091	-2.8091	-2.8091	-0.269622	-2.8091	-2.8091	4.32554	-2.8091	-2.8091	-2.8091	-2.8091
rno-piR-12383	-2.8091	-2.8091	-1.37586	-2.8091	-0.691621	-2.8091	-2.8091	-2.8091	-2.8091	-2.8091	-2.8091	-2.8091	-2.8091	-2.8091	-2.8091	-2.8091	-2.8091	-2.8091	-2.8091	-2.8091	-2.8091	0.563112	-2.8091	-2.8091
rno-piR-12384	-0.497571	-1.21021	-0.716865	-0.153685	-2.8091	-2.8091	-2.8091	-2.8091	-2.8091	-2.8091	-2.8091	-2.8091	-2.8091	-2.8091	-2.8091	-2.8091	-2.8091	-2.8091	-2.8091	-2.8091	-2.8091	-2.8091	-2.8091	-2.8091
rno-piR-12385	-2.8091	-2.8091	-1.17414	-2.8091	-2.8091	-2.8091	-2.8091	-2.8091	-2.8091	-2.8091	-2.8091	-2.8091	-2.8091	-2.8091	-2.8091	-2.8091	-2.8091	-2.8091	-2.8091	-2.8091	-2.8091	-2.8091	-2.8091	-2.8091
rno-piR-12386	-0.497571	-0.640445	-0.380507	-2.8091	-2.8091	-2.8091	-2.8091	-2.8091	-2.8091	-2.8091	-2.8091	-2.8091	-2.8091	-2.8091	-2.8091	-2.8091	-0.912094	-2.8091	-2.8091	-2.8091	-2.8091	-2.8091	-2.8091	-2.8091
rno-piR-12387	-2.8091	-2.8091	-1.00219	-0.817012	-2.8091	0.338593	-2.8091	-2.8091	-2.8091	-2.8091	-2.8091	-2.8091	-2.8091	-0.203124	-2.8091	-2.8091	-0.912094	-2.8091	-2.8091	-2.8091	-2.8091	-2.8091	-2.8091	-2.8091
rno-piR-12389	-0.497571	-1.21021	-0.380507	-0.817012	-0.691621	-0.403412	2.94032	1.51844	-2.8091	-2.8091	1.9153	-2.8091	-2.8091	-2.8091	-2.8091	-2.8091	-0.269622	-2.8091	0.0317522	2.22447	-2.8091	0.563112	-2.8091	-2.8091
rno-piR-1239	0.228153	-2.8091	-1.9595	-2.8091	-2.8091	-2.8091	-2.8091	-2.8091	-2.8091	-2.8091	-2.8091	-2.8091	-2.8091	-2.8091	-2.8091	-2.8091	-0.912094	-2.8091	-2.8091	-2.8091	-2.8091	-2.8091	-2.8091	-2.8091
rno-piR-12390	-2.8091	-2.8091	-2.8091	-2.8091	-2.8091	-2.8091	1.08683	0.646749	-2.8091	-0.291042	-2.8091	-2.8091	-2.8091	-2.8091	-2.8091	-2.8091	-2.8091	-2.8091	0.0317522	2.04396	-2.8091	1.42735	-2.8091	-2.8091
rno-piR-12391	-0.497571	1.2692	1.52393	1.65165	-0.00243066	0.338593	-2.8091	-2.8091	-2.8091	-2.8091	3.6445	-2.8091	-2.8091	1.43551	-2.8091	-2.8091	1.76863	2.09402	0.838007	-2.8091	-2.8091	-2.8091	-2.8091	-2.8091
rno-piR-12392	-2.8091	-2.8091	-1.37586	-2.8091	-2.8091	-2.8091	-2.8091	-2.8091	-2.8091	-2.8091	-2.8091	-2.8091	-2.8091	-2.8091	-2.8091	-2.8091	-2.8091	-0.401497	0.0317522	-2.8091	-2.8091	-2.8091	-2.8091	-2.8091
rno-piR-12393	-0.497571	-2.8091	-1.62376	-0.817012	-2.8091	-2.8091	-2.8091	-2.8091	-2.8091	0.960112	-2.8091	-2.8091	-2.8091	-2.8091	-2.8091	-2.8091	-0.912094	-0.401497	0.0317522	-2.8091	-2.8091	-2.8091	-2.8091	-2.8091
[truncated: 39,791 more rows]
