# Supplementary material for: Aging Induces Profound Changes in sncRNA in Rat Sperm and these Changes are Modified by Perinatal Exposure to Environmental Flame Retardant
Source: Preprints.org preprint supplement (doi:10.20944/preprints202010.0339.v1), 2020-10-16
Supplement: Supplementary file 3 [file Supplemental Table 2.xlsx]

## Sheet: Sheet1
Supplemental Table 2. sncRNA significantly differentially expressed in rat sperm in response to perinatal exposure to BDE-47 and their log2 fold changes on PND65 and 120. sncRNA highlighted in bold are age-dependent). Footnote: *-significant change, FDR adjusted p<0.05
sncRNA	PND65	PND120
tRNA
trna8839-ArgTCT	-2.19	2.49*
trna11369-LeuCAA	0.93	2.87*
trna29-LeuCAG	-0.03	2.57*
trna1661-SerGCT	1.05	3.52*
trna1681-LeuCAA	0.91	2.88*
trna3814-LeuCAA	0.74	2.34*
miRNA
rno-mir-122_precursor	0.36	7.68*
rno-mir-122b_precursor	0.07	7.49*
rno-miR-122-5p	0.89	7.26*
rno-miR-122b	-2.06	7.89*
rno-miR-320-3p	-0.77	7.30*
rno-mir-320_precursor	-0.81	6.77*
rno-miR-423-5p	0.12	5.95*
rno-let-7d-3p	-0.18	5.02*
rno-miR-203a-3p	0.16	4.80*
rno-mir-203a_precursor	0.16	4.59*
rno-let-7b-5p	0.15	3.95*
rno-miR-155-5p	-0.16	4.54*
rno-mir-155_precursor	-0.09	4.42*
rno-miR-452-5p	0	5.86*
rno-mir-423_precursor	-1.04	3.00*
rno-miR-24-2-5p	-0.39	1.89*
rno-miR-184	-0.21	3.17*
rno-let-7b	0.11	3.35*
rno-mir-3571_precursor	4.18*	-2.14
