# Supplementary material for: Aging Induces Profound Changes in sncRNA in Rat Sperm and these Changes are Modified by Perinatal Exposure to Environmental Flame Retardant
Source: Preprints.org preprint supplement (doi:10.20944/preprints202010.0339.v1), 2020-10-16
Supplement: Supplementary file 4 [file Supplemental Table 3.xlsx]

## Sheet: Gene scores
Supplemental Table 3: Genes – targets of 249 age-dependent miRNAs differentially expressed in control animals with prediction score ≥ 80.
Gene Symbol	Number of miRNA targeting gene	Number of down-regulated miRNA	Number of up-regulated miRNA
Nfat5	17	4	13
Cnot6l	16	6	10
Crebrf	16	7	9
Tbl1xr1	15	1	14
Slc38a2	15	5	10
Arhgap12	15	6	9
Gxylt1	15	8	7
Rap2c	14	3	11
Fnip1	14	6	8
Hectd2	14	7	7
Tnrc6b	13	1	12
Six4	13	2	11
Zfyve26	13	4	9
Mycn	13	6	7
Clock	12	2	10
Ptpn4	12	3	9
Tob1	12	4	8
Klf4	12	5	7
Scd	12	6	6
Prtg	12	7	5
Clasp2	12	8	4
Map4k3	12	8	4
Camta1	11	3	8
Bcl11b	11	3	8
Mospd2	11	3	8
Epha4	11	4	7
Fam117b	11	4	7
Mex3c	11	5	6
Pnisr	11	5	6
Nexmif	11	5	6
Tmem65	11	5	6
Slc6a1	11	5	6
Mapk8	11	6	5
Pbx3	11	5	5
Lin28a	11	8	3
Arid4a	10	0	10
Armc8	10	1	9
Hbp1	10	3	7
Mier3	10	3	7
Rapgef2	10	3	7
Aak1	10	2	7
Bcl2l11	10	4	6
Wdr37	10	5	5
Zfp518a	10	5	5
Zfp512b	10	5	5
Has2	10	5	5
Tnpo1	10	5	5
Osbpl8	10	5	5
Fbxo33	10	6	4
Map1b	10	6	4
Dynlt3	10	6	4
Itga8	10	6	4
Plpp6	10	6	4
Cdk17	10	6	4
Snn	10	7	3
Usp32	9	0	9
Zfp367	9	0	9
Uxs1	9	1	8
Cpsf6	9	1	8
Hs3st5	9	1	8
Sall1	9	1	8
Itga6	9	1	8
Atad2	9	1	8
F3	9	2	7
Strn3	9	2	7
Slc24a2	9	2	7
Ezh1	9	2	7
Mylip	9	2	7
Phtf2	9	2	7
Mgat4a	9	2	7
Elavl2	9	2	7
Cnot7	9	3	6
Mon2	9	3	6
Synj1	9	3	6
Srsf1	9	3	6
Runx2	9	3	6
Cd69	9	3	6
Pcmtd1	9	3	6
Tle4	9	4	5
Nr1d2	9	4	5
Rgl1	9	4	5
Kdm3a	9	4	5
Coil	9	4	5
Cercam	9	4	5
Prdm1	9	5	4
Gatm	9	5	4
Cldn12	9	5	4
Thoc2	9	5	4
Gnpda2	9	5	4
Stk39	9	5	4
Rap1a	9	6	3
Adamts15	9	6	3
Rfx6	9	6	3
Fam135a	9	6	3
Gpr22	9	7	2
Plekha8	9	7	2
Stk17b	8	0	8
Ntng1	8	0	8
Oxr1	8	0	8
Fem1c	8	1	7
Arhgap1	8	1	7
Wdr26	8	1	7
Pgm2l1	8	1	7
Aff4	8	2	6
Npas2	8	2	6
Tmem47	8	2	6
Map3k12	8	2	6
Naa30	8	2	6
Cacna1c	8	2	6
Xrn1	8	2	6
Srpra	8	2	6
Scn1a	8	2	6
Rock2	8	2	6
Arih1	8	2	6
Pik3cb	8	1	6
Ccnt2	8	3	5
Luc7l3	8	3	5
Ankrd44	8	4	4
Fbxl3	8	4	4
Robo2	8	4	4
Prpf38b	8	4	4
Mapk6	8	4	4
RGD1308117	8	4	4
Snx16	8	4	4
Mier1	8	4	4
Virma	8	4	4
Tgif1	8	4	4
Fmr1	8	4	4
St6galnac6	8	4	4
Gls	8	5	3
Ddx19b	8	5	3
Col4a1	8	5	3
Pxdn	8	5	3
Zfp275	8	5	3
Fign	8	5	3
Nipal4	8	5	3
Zfpm2	8	5	3
Klhl14	8	5	3
Tgfbr1	8	6	2
Tbkbp1	8	6	2
Npl	8	6	2
Hip1	8	6	2
Ahctf1	8	6	2
Rdx	8	7	1
Bmp3	7	0	7
Usp24	7	0	7
Kif23	7	0	7
Pdgfra	7	0	7
Rnf111	7	1	6
Rp2	7	1	6
Cast	7	1	6
Brd1	7	1	6
Sox4	7	1	6
Ndel1	7	1	6
Pcsk5	7	1	6
2020-09-02	7	1	6
Nedd4l	7	1	6
Zfhx4	7	1	6
Appbp2	7	0	6
Vldlr	7	2	5
Ptpn21	7	2	5
Elmod2	7	2	5
Plekha3	7	2	5
Desi2	7	2	5
Elmod1	7	2	5
Nup35	7	2	5
Slc7a11	7	2	5
Adgrg2	7	2	5
Rsbn1	7	2	5
Slc24a3	7	2	5
Aida	7	2	5
Ccni	7	2	5
Rb1cc1	7	2	5
Plppr4	7	2	5
Usp33	7	2	5
Klf3	7	2	5
Pkia	7	2	5
Zcchc24	7	1	5
Pde3b	7	1	5
Pcdha4	7	1	5
Gpr158	7	3	4
Ebf2	7	3	4
Smurf2	7	3	4
Pik3ca	7	3	4
Hook3	7	3	4
Snx27	7	3	4
Cfl2	7	3	4
P4ha2	7	3	4
Dcaf6	7	3	4
Dnajb9	7	3	4
Acer2	7	3	4
Man2a1	7	3	4
Pafah1b1	7	3	4
Sema4b	7	3	4
Dstyk	7	3	4
Plekha1	7	3	4
Retreg2	7	3	4
Mtf1	7	3	4
Csnk1g3	7	3	4
Chd1	7	3	4
Mmd	7	2	4
Gpm6a	7	4	3
Homer1	7	4	3
Ppm1b	7	4	3
Akap10	7	4	3
Rev3l	7	4	3
Abhd13	7	4	3
Btg2	7	4	3
Klhl29	7	4	3
Fam83h	7	4	3
Ipmk	7	4	3
Adamtsl3	7	4	3
Masp1	7	4	3
Faslg	7	4	3
Adamts12	7	4	3
Lrig2	7	4	3
Col13a1	7	4	3
Lats2	7	4	3
Kmt5b	7	4	3
Cbln4	7	4	3
Cdk19	7	4	3
Armc1	7	3	3
Tcf7l2	7	5	2
Azin1	7	5	2
Rasgrp1	7	5	2
Xkr8	7	5	2
Smim3	7	5	2
Grb10	7	5	2
Syvn1	7	5	2
Kcns3	7	6	1
Edn1	7	6	1
Taf9b	7	6	1
Arid3b	7	7	0
Nkiras1	6	0	6
Tiam1	6	0	6
Nr2c2	6	0	6
Zfyve9	6	0	6
Chd5	6	0	6
Fbxo48	6	0	6
Bmpr2	6	0	6
Neurog1	6	0	6
Cc2d1a	6	0	6
Fibin	6	0	6
Gpr63	6	0	6
Cmpk1	6	0	6
Rasd1	6	0	6
Fam45a	6	0	6
Rab33b	6	0	6
Sos1	6	0	6
Snx10	6	0	6
Btg3	6	0	6
Tmcc3	6	0	6
Tsg101	6	0	6
Ccng2	6	1	5
Ptgfrn	6	1	5
Fyco1	6	1	5
Gigyf1	6	1	5
Sike1	6	1	5
Tfdp1	6	1	5
Rap1gds1	6	1	5
Calcr	6	1	5
Zdhhc21	6	1	5
Rgma	6	1	5
Etv1	6	1	5
Arfgef1	6	1	5
Mbnl2	6	1	5
Sft2d2	6	1	5
Akap13	6	1	5
Zbtb4	6	1	5
Nfatc3	6	1	5
Frmd6	6	1	5
Atp2b2	6	1	5
Fcho2	6	1	5
Ano1	6	1	5
Zfp644	6	1	5
Tmem41b	6	1	5
Ap1s2	6	1	5
Mmgt1	6	1	5
Ptpn13	6	1	5
Socs6	6	1	5
Spast	6	1	5
Ppp4r3b	6	1	5
Map2k1	6	1	5
Ankib1	6	1	5
Laptm4a	6	1	5
Sephs1	6	1	5
Zbtb39	6	1	5
Mapre3	6	0	5
Zbtb20	6	2	4
Slc8a1	6	2	4
Necap1	6	2	4
Irs1	6	2	4
Ubp1	6	2	4
Mbnl3	6	2	4
Spire1	6	2	4
Lpgat1	6	2	4
Slc30a4	6	2	4
Ppp1r15b	6	2	4
Scamp2	6	2	4
Tbk1	6	2	4
Ulk2	6	2	4
Atxn3	6	2	4
Zfp287	6	2	4
Gfpt2	6	2	4
Bloc1s4	6	2	4
Ccnjl	6	2	4
Ezh2	6	2	4
Sort1	6	2	4
Nup153	6	2	4
Tshz3	6	2	4
Ppfia1	6	2	4
Frs2	6	2	4
Ythdf3	6	2	4
Mfsd6	6	2	4
Wnk1	6	2	4
Ndfip2	6	2	4
Psip1	6	2	4
Socs5	6	1	4
Wdfy3	6	1	4
Kcnj6	6	1	4
Col4a3bp	6	3	3
Ino80	6	3	3
Samd4a	6	3	3
Nfkbia	6	3	3
Bcl6	6	3	3
Arhgap21	6	3	3
Dyrk2	6	3	3
Itga5	6	3	3
Rhpn2	6	3	3
Ints2	6	3	3
Spock3	6	3	3
Slc17a6	6	3	3
Tp63	6	3	3
Stard13	6	3	3
RGD1307100	6	3	3
Enpep	6	3	3
Grsf1	6	3	3
Trak2	6	3	3
Zfp281	6	3	3
Rimbp2	6	3	3
Per2	6	3	3
Errfi1	6	3	3
Gja1	6	3	3
Zfp280d	6	3	3
Ppp1r2	6	3	3
Tent4b	6	2	3
Xpo4	6	2	3
Daam1	6	2	3
Pum2	6	2	3
Grid2	6	2	3
2020-03-06	6	2	3
Ube2b	6	4	2
Senp7	6	4	2
Nr3c1	6	4	2
Mybl1	6	4	2
R3hdm1	6	4	2
Ppp4r2	6	4	2
Rab11fip4	6	4	2
Acer1	6	4	2
Pgrmc1	6	4	2
Ddi2	6	4	2
Fzd4	6	4	2
Smarcad1	6	4	2
Pkdcc	6	4	2
Dusp5	6	4	2
Wrnip1	6	4	2
Irf4	6	4	2
Hivep1	6	4	2
Adam10	6	4	2
Olfml2a	6	4	2
Rps6ka3	6	4	2
Sema6d	6	4	2
Spry2	6	4	2
Ago1	6	3	2
Dcun1d4	6	3	2
Naa15	6	3	2
Tsc22d2	6	3	2
Gata6	6	3	2
Lrp6	6	3	2
Ddx19a	6	5	1
Gas7	6	5	1
Itgal	6	5	1
Stk40	6	5	1
Bap1	6	5	1
Hic2	6	5	1
Vstm5	6	5	1
Slc2a12	6	5	1
Igf2bp2	6	5	1
Pla2g3	6	5	1
Adrb2	6	5	1
Gng5	6	5	1
Rpusd3	6	5	1
Slc20a1	6	5	1
RGD1304694	6	5	1
Ago3	6	5	1
Abcb9	6	5	1
Wnt9b	6	5	1
Mdfi	6	5	1
Cul3	6	5	1
Gtpbp2	6	6	0
Akap6	5	0	5
Pank3	5	0	5
Kcna4	5	0	5
Slc12a6	5	0	5
Klhl20	5	0	5
Pptc7	5	0	5
Wdr44	5	0	5
Crot	5	0	5
B3galnt2	5	0	5
Topors	5	0	5
Caps2	5	0	5
Ldlrap1	5	0	5
Arid1a	5	0	5
St6galnac3	5	0	5
Rab11a	5	0	5
Entpd7	5	0	5
Ythdc1	5	0	5
Nectin1	5	0	5
Ahnak	5	0	5
Ddhd1	5	0	5
Dync1li2	5	0	5
Ssh2	5	0	5
Usp47	5	0	5
Mink1	5	0	5
Sqstm1	5	0	5
Polr3g	5	0	5
Ankrd17	5	0	5
Ccne2	5	0	5
Capn5	5	0	5
Fbxo30	5	0	5
Nav3	5	0	5
Tnfrsf21	5	0	5
Atg16l1	5	0	5
Slc40a1	5	0	5
LOC100125364	5	0	5
Zfp91	5	0	5
Erlec1	5	1	4
Tph1	5	1	4
Raf1	5	1	4
Capn15	5	1	4
RGD1560455	5	1	4
Jpt1	5	1	4
Vsx1	5	1	4
Ap3s1	5	1	4
Dipk2a	5	1	4
Ybx3	5	1	4
Rbl2	5	1	4
Sall3	5	1	4
Klf11	5	1	4
Reep3	5	1	4
Galnt3	5	1	4
Sar1a	5	1	4
Lhx2	5	1	4
Ddit4	5	1	4
Atp1b1	5	1	4
Ahcyl2	5	1	4
Ptp4a1	5	1	4
Drd1	5	1	4
Fdx1	5	1	4
Dennd6a	5	1	4
Ypel5	5	1	4
Mcm3	5	1	4
Yipf6	5	1	4
Ttpa	5	1	4
Tmem33	5	1	4
Rasl11b	5	1	4
Lima1	5	1	4
Map3k14	5	1	4
Gon4l	5	1	4
Pds5b	5	1	4
Nabp1	5	1	4
Pfn2	5	1	4
Pkd2	5	1	4
Mprip	5	1	4
Ckap4	5	1	4
Slc19a2	5	1	4
Nrbp1	5	1	4
Radx	5	1	4
Arid4b	5	1	4
Carmil1	5	1	4
Gpr6	5	1	4
Brms1l	5	1	4
Dll4	5	1	4
Prickle2	5	1	4
Trhde	5	1	4
Npat	5	1	4
Trpm7	5	1	4
Calu	5	1	4
Zfp148	5	1	4
Epn2	5	1	4
Meox2	5	1	4
Limk1	5	1	4
Map3k8	5	0	4
Txnip	5	0	4
Pxk	5	0	4
RGD1563349	5	0	4
Slc6a5	5	0	4
Rab5b	5	0	4
Smarca2	5	2	3
Syngr3	5	2	3
Ap1s3	5	2	3
Slc12a2	5	2	3
Usp46	5	2	3
Cxxc4	5	2	3
Tspan13	5	2	3
Retreg1	5	2	3
Tra2a	5	2	3
Tram1l1	5	2	3
Mapk1	5	2	3
Grem2	5	2	3
Tm6sf1	5	2	3
Tnrc6a	5	2	3
Dpy19l1	5	2	3
Prkcb	5	2	3
Cdk14	5	2	3
Ppp4r4	5	2	3
Atp2c1	5	2	3
PCOLCE2	5	2	3
Nox4	5	2	3
Pip5k1c	5	2	3
Plekhb2	5	2	3
Edem1	5	2	3
Insig1	5	2	3
Sim2	5	2	3
Rnf180	5	2	3
Tagap	5	2	3
Herc2	5	2	3
Tcf21	5	2	3
Nefh	5	2	3
C1qtnf3	5	2	3
Ccnc	5	2	3
Ddx3x	5	2	3
Luzp1	5	2	3
Sox9	5	2	3
Usp25	5	2	3
Slit2	5	2	3
Mllt10	5	2	3
Cul2	5	2	3
Crebzf	5	2	3
Jag1	5	2	3
Ubl3	5	2	3
Ube2d1	5	2	3
G2e3	5	2	3
Zfand6	5	2	3
Slc4a1	5	2	3
Glcci1	5	2	3
Uba6	5	2	3
Slc18a2	5	2	3
Ier5	5	2	3
Serinc1	5	2	3
Canx	5	2	3
B4galt6	5	2	3
Raph1	5	1	3
Wasf1	5	1	3
Capn7	5	1	3
Prkaa1	5	1	3
Cdc14a	5	1	3
Arl8b	5	1	3
Gucy1b1	5	1	3
Cdkn1b	5	1	3
Asb3	5	1	3
Gnai1	5	1	3
Lats1	5	1	3
Gabarapl2	5	1	3
Bmp5	5	1	3
Ing2	5	3	2
Ppm1d	5	3	2
Ambra1	5	3	2
Jade1	5	3	2
Gabpa	5	3	2
Slc39a10	5	3	2
Usp28	5	3	2
Lrrtm2	5	3	2
Fam20c	5	3	2
Kat6a	5	3	2
Pdik1l	5	3	2
Pde7a	5	3	2
Fras1	5	3	2
Glra1	5	3	2
Olr1	5	3	2
Lrrc32	5	3	2
Snap29	5	3	2
Aars	5	3	2
Ammecr1l	5	3	2
Sim1	5	3	2
Btbd1	5	3	2
Slc12a5	5	3	2
Sowahc	5	3	2
Vps4b	5	3	2
Lhfpl2	5	3	2
Mapre2	5	3	2
Ubr7	5	3	2
Rbpms2	5	3	2
Hnf1b	5	3	2
Cyp24a1	5	3	2
Rad21	5	3	2
Tmem120b	5	3	2
P2rx4	5	3	2
Bsdc1	5	3	2
Scaf11	5	3	2
Slitrk6	5	3	2
Fkbp1a	5	3	2
Sema4c	5	3	2
Lurap1l	5	3	2
Csmd1	5	3	2
Kmt2e	5	3	2
Grhl2	5	3	2
Golga7	5	3	2
Zfp292	5	3	2
Sulf1	5	3	2
Zeb1	5	3	2
Nova1	5	2	2
Tank	5	2	2
Rbfox1	5	2	2
Hmcn1	5	2	2
Nus1	5	2	2
Nedd9	5	2	2
Hace1	5	2	2
Npy1r	5	2	2
Tfdp2	5	2	2
Tmem229a	5	2	2
Tmem178b	5	2	2
Esrrg	5	4	1
Mmd2	5	4	1
Enpp2	5	4	1
Speg	5	4	1
Srsf2	5	4	1
Akirin1	5	4	1
Eif4enif1	5	4	1
Med14	5	4	1
Pcgf6	5	4	1
Acvr1c	5	4	1
Hnrnpu	5	4	1
Ehhadh	5	4	1
Tspan5	5	4	1
Tyk2	5	4	1
Zfp583	5	4	1
Tmprss2	5	4	1
Nme4	5	4	1
Pald1	5	4	1
Ccdc134	5	4	1
Nme6	5	4	1
Wnt9a	5	4	1
Ercc6	5	4	1
Limd2	5	4	1
Dtx2	5	4	1
Lipt2	5	4	1
Ndst2	5	4	1
B3gnt7	5	4	1
Nphp3	5	4	1
Dcaf15	5	4	1
Ppargc1b	5	4	1
Apbb3	5	4	1
Plekho1	5	4	1
B3galt4	5	4	1
Aen	5	4	1
Efhd2	5	4	1
B3galt1	5	4	1
Slc35d2	5	4	1
Il6	5	4	1
Brd3	5	4	1
Zfp282	5	4	1
Irs2	5	4	1
Kctd17	5	4	1
Begain	5	4	1
Zmat4	5	4	1
Grid2ip	5	4	1
Gpr132	5	4	1
Kif2b	5	4	1
Cbx2	5	4	1
Sstr3	5	4	1
Rcn1	5	4	1
Scyl3	5	4	1
Prl3b1	5	4	1
Zdhhc23	5	4	1
Ppp4r3a	5	4	1
Pi4k2b	5	4	1
Nup210	5	4	1
Ccnj	5	4	1
Tspan12	5	4	1
Casp2	5	4	1
Cacna1b	5	4	1
Tmem168	5	4	1
Crem	5	4	1
Gclc	5	4	1
Mitf	5	4	1
Zfp652	5	3	1
Hsp90b1	5	3	1
Slc44a1	5	3	1
Plcb4	5	3	1
Rcn2	5	3	1
Flvcr2	5	5	0
Adrb3	5	5	0
Cdc34	5	5	0
Pbx1	5	5	0
Ptafr	5	5	0
Fbxl12	5	5	0
LOC497899	5	5	0
Tra2b	5	5	0
Rhoq	5	5	0
Sertad3	5	5	0
Sel1l	5	5	0
M6pr	5	5	0
Memo1	5	5	0
Med26	4	0	4
Klf10	4	0	4
Rhebl1	4	0	4
Ube2a	4	0	4
Chp1	4	0	4
Gmfb	4	0	4
Socs1	4	0	4
Kbtbd7	4	0	4
Oprk1	4	0	4
Ccdc43	4	0	4
Kif13a	4	0	4
Cpne4	4	0	4
Slc35g2	4	0	4
Ppp1r11	4	0	4
Nrip3	4	0	4
Ppp2r3a	4	0	4
Pik3cd	4	0	4
Stag2	4	0	4
Arf4	4	0	4
Fbxl5	4	0	4
Mastl	4	0	4
Pthlh	4	0	4
Gpr137c	4	0	4
Cep97	4	0	4
Casp8	4	0	4
2020-03-08	4	0	4
Usp3	4	0	4
Vangl1	4	0	4
Zfp9	4	0	4
Fam221a	4	0	4
Rab22a	4	0	4
Prrg1	4	0	4
Uri1	4	0	4
Stx6	4	0	4
Tmem127	4	0	4
Sfmbt1	4	0	4
Nagk	4	0	4
Trip10	4	0	4
Retreg3	4	0	4
Prr15	4	0	4
Kpna2	4	0	4
Klf9	4	0	4
Sar1b	4	0	4
Psd	4	0	4
Ogfod2	4	0	4
RGD1311188	4	0	4
Afg1l	4	0	4
Arhgap35	4	0	4
Snx8	4	0	4
Lzic	4	0	4
Ppp1r21	4	0	4
RGD1305455	4	0	4
Map3k2	4	0	4
Ttc8	4	0	4
Styx	4	0	4
Oas1e	4	0	4
Mmp24	4	0	4
Cald1	4	0	4
Sds	4	0	4
Tmem196	4	0	4
Rhoc	4	0	4
Cep120	4	0	4
RGD621098	4	0	4
Cmtr2	4	0	4
Sh3bp2	4	0	4
Kif5a	4	0	4
Fat2	4	0	4
Trpv6	4	0	4
Cyp4a2	4	0	4
Gramd1a	4	0	4
Dusp2	4	0	4
Spns2	4	0	4
Arhgef18	4	0	4
Osr1	4	0	4
Efcab14	4	0	4
Camk4	4	0	4
Celsr2	4	0	4
Htr2c	4	0	4
Rtn4rl1	4	0	4
Adgrb3	4	1	3
Abcd2	4	1	3
Apln	4	1	3
Cd48	4	1	3
Cdc37l1	4	1	3
Bcor	4	1	3
Prkca	4	1	3
Kpna6	4	1	3
Taf5	4	1	3
Pnkd	4	1	3
Stt3a	4	1	3
Zfp445	4	1	3
Mbd6	4	1	3
Tfcp2l1	4	1	3
Dazl	4	1	3
Ttc19	4	1	3
Marveld2	4	1	3
Dgkz	4	1	3
Adamts9	4	1	3
Wipf1	4	1	3
Nr4a3	4	1	3
Zic5	4	1	3
Rbms1	4	1	3
Gria4	4	1	3
Myt1	4	1	3
Zmym4	4	1	3
Acsl4	4	1	3
Srsf7	4	1	3
Gskip	4	1	3
Eif5a2	4	1	3
Tmed7	4	1	3
Pdcd10	4	1	3
Tbpl1	4	1	3
Stim2	4	1	3
Osbpl11	4	1	3
Cep41	4	1	3
Marcks	4	1	3
Ppp2r5e	4	1	3
Nup160	4	1	3
Etaa1	4	1	3
Ppp1r18	4	1	3
Dock7	4	1	3
Mdm1	4	1	3
Arhgef3	4	1	3
Ccdc126	4	1	3
Nfyb	4	1	3
Mex3b	4	1	3
Plag1	4	1	3
Spen	4	1	3
Dll1	4	1	3
Kiaa0408L	4	1	3
Pcgf5	4	1	3
Setd5	4	1	3
Ltn1	4	1	3
Lpar4	4	1	3
Gria2	4	1	3
Nrn1	4	1	3
Fbxo43	4	1	3
F13b	4	1	3
Rfx7	4	1	3
Gulp1	4	1	3
Katnbl1	4	1	3
Bnc2	4	1	3
Arf6	4	1	3
Rbm24	4	1	3
Cav1	4	1	3
Casc4	4	1	3
Camsap1	4	1	3
Cryz	4	1	3
Cyth3	4	1	3
Stox2	4	1	3
Frk	4	1	3
Slc25a54	4	1	3
Cbfb	4	1	3
Paip1	4	0	3
Kitlg	4	0	3
Foxg1	4	0	3
Gtf2h1	4	0	3
Pip4k2a	4	0	3
Ermn	4	0	3
Enc1	4	0	3
Srsf6	4	0	3
Srf	4	2	2
Dr1	4	2	2
Ppp1r9b	4	2	2
Epb41l3	4	2	2
Traf3	4	2	2
Tut4	4	2	2
Tnfrsf12a	4	2	2
RGD1560108	4	2	2
Man1a2	4	2	2
Bcorl1	4	2	2
Arfip1	4	2	2
Vdac1	4	2	2
Snx33	4	2	2
Sp1	4	2	2
Brpf1	4	2	2
Lrrc40	4	2	2
Ror1	4	2	2
Ankrd13c	4	2	2
Ccng1	4	2	2
N4bp1	4	2	2
Rbsn	4	2	2
Usp9x	4	2	2
Wsb1	4	2	2
Stc1	4	2	2
Eif3a	4	2	2
Nbr1	4	2	2
Atp2a2	4	2	2
Peak1	4	2	2
Ttc9	4	2	2
Cldn11	4	2	2
Cdca7l	4	2	2
Isca1	4	2	2
Ugp2	4	2	2
Ptpro	4	2	2
Ptar1	4	2	2
Ppp1r37	4	2	2
Nefm	4	2	2
Hps6	4	2	2
Itprid2	4	2	2
Usp36	4	2	2
Rgs17	4	2	2
Arf1	4	2	2
Pp2d1	4	2	2
Tef	4	2	2
Tent4a	4	2	2
P3h3	4	2	2
Gata2	4	2	2
Spryd4	4	2	2
Itpr1	4	2	2
Ppcs	4	2	2
Tpcn1	4	2	2
Dus2	4	2	2
Grip2	4	2	2
Cog3	4	2	2
Fzd10	4	2	2
Slc25a32	4	2	2
Col1a2	4	2	2
Ube2z	4	2	2
Polk	4	2	2
Gramd2b	4	2	2
Zim1	4	2	2
Cdk16	4	2	2
Npc1	4	2	2
Epc1	4	2	2
Hao2	4	2	2
Syap1	4	2	2
Prkar1b	4	2	2
Bbs7	4	2	2
Wasl	4	2	2
Grp	4	2	2
Pon2	4	2	2
Sinhcaf	4	2	2
Ankrd12	4	2	2
Socs4	4	2	2
Sec11a	4	2	2
Pum1	4	2	2
Hnrnpd	4	2	2
Ppp3r1	4	2	2
Krit1	4	2	2
Tmem198b	4	2	2
Spag9	4	2	2
Nfe2l2	4	2	2
Olfm3	4	2	2
Capza2	4	2	2
Arl6ip6	4	2	2
Nol4	4	2	2
Trhr	4	2	2
Lgalsl	4	2	2
Patl1	4	2	2
Bnip3l	4	2	2
Clec7a	4	2	2
Usp42	4	2	2
Chsy1	4	2	2
Nxt2	4	2	2
Epc2	4	2	2
Rras2	4	2	2
Lpar1	4	2	2
Capn6	4	2	2
Hipk1	4	2	2
Nudt4	4	2	2
Phf3	4	2	2
Sos2	4	2	2
Pnrc1	4	1	2
Ggt7	4	1	2
Plagl1	4	1	2
Gabra5	4	1	2
Syt4	4	1	2
Vom2r32	4	1	2
Cdk13	4	1	2
Josd1	4	1	2
Slc6a8	4	1	2
Mab21l2	4	1	2
Kcnd3	4	1	2
Kbtbd2	4	1	2
Fam43a	4	1	2
Cggbp1	4	1	2
LOC100125362	4	1	2
Sec24a	4	1	2
Esm1	4	1	2
Rab15	4	1	2
Ulk1	4	1	2
Slc23a2	4	1	2
Dixdc1	4	1	2
Mylk	4	1	2
Slc20a2	4	1	2
Ywhah	4	0	2
Sorbs2	4	3	1
Erf	4	3	1
Kti12	4	3	1
Ubqln2	4	3	1
Fnip2	4	3	1
Ppp1r12c	4	3	1
Elk1	4	3	1
Ptpn12	4	3	1
Clcn3	4	3	1
Npc2	4	3	1
Nsun6	4	3	1
Cdc42se2	4	3	1
Fscn1	4	3	1
Tent5a	4	3	1
Fam168a	4	3	1
Vsnl1	4	3	1
Tnfrsf11b	4	3	1
Fam126b	4	3	1
Soat2	4	3	1
Med8	4	3	1
Elp1	4	3	1
Sec16b	4	3	1
Ngf	4	3	1
Amt	4	3	1
Mycbp	4	3	1
Armt1	4	3	1
Tcte1	4	3	1
Pbx2	4	3	1
Slc12a9	4	3	1
Tnfrsf1b	4	3	1
Mtmr7	4	3	1
Liph	4	3	1
Klhl6	4	3	1
Ripk2	4	3	1
Lypla1	4	3	1
Naa50	4	3	1
Twistnb	4	3	1
Bcat2	4	3	1
Tnfaip1	4	3	1
Sema4d	4	3	1
Zfp523	4	3	1
Dram1	4	3	1
Slc6a17	4	3	1
Gga2	4	3	1
Alg6	4	3	1
Vtcn1	4	3	1
Abcb11	4	3	1
Irx3	4	3	1
Bdnf	4	3	1
LOC680039	4	3	1
Smarca5	4	3	1
Slitrk1	4	3	1
Tpm1	4	3	1
Ube2h	4	2	1
Klf6	4	2	1
Grhl3	4	2	1
Fn1	4	2	1
Rpgrip1l	4	2	1
Blcap	4	2	1
Rreb1	4	2	1
Tada2b	4	2	1
Chmp1b	4	2	1
Sorl1	4	2	1
Slitrk5	4	2	1
Pdzd8	4	1	1
Lin54	4	1	1
Atp1b4	4	0	1
Slc25a35	4	4	0
Cdc42bpg	4	4	0
Esrra	4	4	0
Tle3	4	4	0
Clec4a1	4	4	0
Saxo2	4	4	0
Ncan	4	4	0
Ywhaq	4	4	0
Syk	4	4	0
Ets1	4	4	0
Neu1	4	4	0
Gabra1	4	4	0
Abhd6	4	4	0
Tmem25	4	4	0
Stat3	4	4	0
Blzf1	4	4	0
Kcnk10	4	4	0
Dram2	4	4	0
Sbno1	4	4	0
Glb1l2	4	4	0
Suv39h1	4	4	0
Ajuba	4	4	0
Cntd1	4	4	0
Ccdc77	4	4	0
Mal2	4	4	0
Rai1	4	3	0
Nkapd1	4	3	0
Ppp6r3	4	3	0
Nfasc	4	3	0
Mknk2	4	3	0
Dus1l	4	3	0
Rbm20	4	3	0
Chtf8	4	3	0
Hivep2	4	3	0
Zfp609	4	3	0
Cpeb1	4	2	0
Pdgfrb	3	0	3
Ogt	3	0	3
Atg4a	3	0	3
Capza1	3	0	3
Pwwp3b	3	0	3
Sec61a2	3	0	3
Hmgb1	3	0	3
Prr16	3	0	3
Dsc2	3	0	3
Omg	3	0	3
Cdk8	3	0	3
Rai14	3	0	3
Eed	3	0	3
Extl2	3	0	3
Mboat1	3	0	3
Skp2	3	0	3
Mitd1	3	0	3
Actc1	3	0	3
Foxb1	3	0	3
Becn1	3	0	3
Gas2	3	0	3
Nt5e	3	0	3
Fam214a	3	0	3
Luc7l2	3	0	3
Foxd1	3	0	3
Tdg	3	0	3
Tmed2	3	0	3
Eya4	3	0	3
Mab21l1	3	0	3
Zfp709l1	3	0	3
Mlh3	3	0	3
Megf9	3	0	3
Nr1h2	3	0	3
Ahr	3	0	3
Adcy7	3	0	3
Taok2	3	0	3
Agtrap	3	0	3
Vamp2	3	0	3
Rras	3	0	3
Fgd6	3	0	3
Fam76a	3	0	3
Letm2	3	0	3
Notch1	3	0	3
Tmem79	3	0	3
Pacs1	3	0	3
Ubl4a	3	0	3
Gpr165	3	0	3
Fam167a	3	0	3
Crkl	3	0	3
Asic2	3	0	3
Usf1	3	0	3
Snx15	3	0	3
Kidins220	3	0	3
Kcna6	3	0	3
Eml5	3	0	3
Slc44a2	3	0	3
Ing5	3	0	3
Astn1	3	0	3
Shkbp1	3	0	3
Fam107a	3	0	3
Cntn2	3	0	3
Dpp3	3	0	3
Ucn2	3	0	3
Olig3	3	0	3
Edn2	3	0	3
Dcx	3	0	3
Rgs9	3	0	3
Vat1	3	0	3
Ctnnd2	3	0	3
Tbc1d2b	3	0	3
Xpo5	3	0	3
Eps15	3	0	3
Baalc	3	0	3
Plod1	3	0	3
Pnoc	3	0	3
Bdkrb2	3	0	3
Gmppb	3	0	3
Actbl2	3	0	3
Ano4	3	1	2
Car7	3	1	2
Slc15a2	3	1	2
Cnot9	3	1	2
Dlgap1	3	1	2
Slc25a24	3	1	2
Tll1	3	1	2
Atrn	3	1	2
Vps26a	3	1	2
Cyb561	3	1	2
Rad23b	3	1	2
Ocrl	3	1	2
Cd47	3	1	2
Snapin	3	1	2
Tpbg	3	1	2
Tbc1d10b	3	1	2
Smad1	3	1	2
Mafk	3	1	2
Scn2a	3	1	2
Lrrc61	3	1	2
Kif2a	3	1	2
Tardbp	3	1	2
Nlrp1a	3	1	2
Ppil4	3	1	2
Scara5	3	1	2
Naf1	3	1	2
Lhx8	3	1	2
Fam210b	3	1	2
Cltrn	3	1	2
Adam19	3	1	2
Iars	3	1	2
Gli2	3	1	2
Negr1	3	1	2
Slc25a16	3	1	2
Il10rb	3	1	2
Nap1l5	3	1	2
Ppp1r3a	3	1	2
Tenm3	3	1	2
Pawr	3	1	2
Snai1	3	1	2
Foxj3	3	1	2
Itfg1	3	1	2
Twf1	3	1	2
Ereg	3	1	2
RGD1308428	3	1	2
Eif4e	3	1	2
Ubxn2b	3	1	2
Slc25a25	3	1	2
Mtx1	3	1	2
Gpr37	3	1	2
Cntn4	3	1	2
Rb1	3	1	2
Mapk4	3	1	2
Kcnv1	3	1	2
Reck	3	1	2
Arl13b	3	1	2
Flrt3	3	1	2
Tmeff1	3	1	2
Tmem230	3	1	2
Xpo7	3	1	2
Igsf10	3	1	2
Tfap2a	3	1	2
Btnl7	3	1	2
Tgfbr3	3	1	2
Il6r	3	1	2
Prpf4b	3	1	2
Zfp532	3	1	2
Fat3	3	1	2
Ankhd1	3	1	2
Agmo	3	1	2
Evi5	3	1	2
Ric3	3	1	2
Ascc3	3	1	2
Usp45	3	1	2
Supt20h	3	1	2
Terb2	3	1	2
E2f6	3	1	2
Fam210a	3	1	2
Gem	3	1	2
Rbm26	3	1	2
Arap2	3	1	2
Emp2	3	1	2
Btaf1	3	1	2
Scn7a	3	1	2
Ube2v2	3	1	2
Plppr5	3	1	2
Ralgds	3	1	2
Srsf11	3	1	2
Dcaf7	3	1	2
RGD1310553	3	1	2
Abcb1a	3	1	2
Eif4a2	3	1	2
Exo5	3	1	2
Rcan2	3	1	2
Tmem109	3	1	2
Dvl2	3	1	2
Unc79	3	1	2
Tmem39a	3	1	2
Fa2h	3	1	2
Zfp219	3	1	2
Ispd	3	1	2
Ppfia2	3	1	2
Hira	3	1	2
Crebbp	3	1	2
Cdc73	3	1	2
Cep104	3	1	2
RGD1560010	3	1	2
Mmp12	3	1	2
Eif2ak3	3	1	2
B3gnt5	3	1	2
Ube2d3	3	1	2
Brinp3	3	1	2
Fam83f	3	1	2
Fchsd2	3	1	2
Fignl1	3	1	2
Nap1l2	3	1	2
Copb1	3	1	2
Sgcb	3	1	2
Rundc3b	3	1	2
Qtrt2	3	1	2
Sptlc2	3	1	2
Bccip	3	1	2
Ppp1r1c	3	1	2
Armh4	3	1	2
Trappc8	3	1	2
Zfp608	3	1	2
Mphosph9	3	1	2
Gpr155	3	1	2
Klhl42	3	1	2
Impdh1	3	1	2
RGD1305350	3	1	2
Fam120a	3	1	2
Nipa2	3	1	2
Dsel	3	1	2
Igfbp3	3	1	2
Vip	3	1	2
Aldh3a2	3	1	2
Esrp2	3	1	2
Btbd7	3	1	2
Mpped2	3	1	2
Tbc1d8	3	1	2
Tnks	3	1	2
Kcnq5	3	1	2
Abhd17c	3	1	2
Ptbp3	3	1	2
Zc4h2	3	1	2
Rin2	3	1	2
Gpr85	3	1	2
Slc9a1	3	1	2
Zfp521	3	1	2
Zbtb10	3	1	2
Vegfa	3	1	2
Scn9a	3	1	2
Cldn8	3	1	2
Shank2	3	0	2
Prr5l	3	0	2
Vkorc1l1	3	0	2
Dhx36	3	0	2
Zfand3	3	0	2
Pcdh17	3	0	2
Ash1l	3	0	2
Ednra	3	0	2
Slc35f1	3	0	2
Fam49a	3	0	2
Polr3e	3	0	2
Mxi1	3	0	2
Vamp3	3	0	2
Ptprj	3	0	2
Dnajb1	3	0	2
Me1	3	0	2
Slc22a23	3	0	2
RGD1563667	3	0	2
Ublcp1	3	0	2
Hebp2	3	0	2
Dolpp1	3	0	2
Snx17	3	0	2
Mcfd2	3	0	2
Kctd8	3	0	2
Mdh1	3	0	2
Ppp3ca	3	0	2
Unc5c	3	0	2
Zfp385b	3	0	2
Sacm1l	3	0	2
Zzz3	3	0	2
Emp1	3	0	2
Maml1	3	0	2
Mob4	3	0	2
Peli1	3	0	2
Kif16b	3	0	2
Idh1	3	0	2
Celsr3	3	0	2
Phf12	3	0	2
Nhlh2	3	0	2
Fam131b	3	0	2
Nr3c2	3	0	2
Afdn	3	0	2
Fyttd1	3	0	2
Mmaa	3	0	2
Mxd1	3	0	2
Slc39a1	3	0	2
Dcaf8	3	0	2
Ttc33	3	2	1
Zfyve1	3	2	1
Ap1ar	3	2	1
Atg12	3	2	1
Zmym6	3	2	1
Pkn2	3	2	1
Nutf2	3	2	1
Xrcc2	3	2	1
Plcl1	3	2	1
Ppp2r1b	3	2	1
Trmt9b	3	2	1
2020-09-07	3	2	1
H6pd	3	2	1
Hcls1	3	2	1
Bicd2	3	2	1
Dnajc6	3	2	1
Myo1d	3	2	1
Rprd1b	3	2	1
Ik	3	2	1
Crispld1	3	2	1
Ralgapa1	3	2	1
Tln1	3	2	1
Dag1	3	2	1
Cep76	3	2	1
Acsbg1	3	2	1
Nlk	3	2	1
Zc3h6	3	2	1
Ankrd40	3	2	1
Cacnb2	3	2	1
Rab10	3	2	1
Ick	3	2	1
Mark1	3	2	1
Dcaf10	3	2	1
Anks1b	3	2	1
Slc25a46	3	2	1
Phex	3	2	1
Zfp385d	3	2	1
Ptgfr	3	2	1
Tacc2	3	2	1
Ddc	3	2	1
Arhgef15	3	2	1
Pias4	3	2	1
Rassf3	3	2	1
Gramd1b	3	2	1
Kcnc2	3	2	1
Sox2	3	2	1
Slc30a7	3	2	1
Nudt21	3	2	1
Tlk1	3	2	1
Ccna2	3	2	1
Arcn1	3	2	1
Add3	3	2	1
Ube2g1	3	2	1
Rarb	3	2	1
Otud6b	3	2	1
Ccdc80	3	2	1
Hmgn1	3	2	1
Cep162	3	2	1
Vezf1	3	2	1
Kdm2b	3	2	1
Tmco3	3	2	1
Tbx18	3	2	1
Khdrbs1	3	2	1
Dkk1	3	2	1
Hmgcr	3	2	1
Serpini1	3	2	1
Cul1	3	2	1
Stk3	3	2	1
Selenok	3	2	1
Papolg	3	2	1
Gdap2	3	2	1
Atp1b3	3	2	1
Tns3	3	2	1
Sema3c	3	2	1
Peg12	3	2	1
Ptpn2	3	2	1
Slc6a15	3	2	1
Kbtbd8	3	2	1
Morc3	3	2	1
Trim2	3	2	1
Cbx7	3	2	1
Zfp36l2	3	2	1
Cebpz	3	2	1
Mageb16	3	2	1
Mb21d2	3	2	1
Trappc10	3	2	1
Nrg1	3	2	1
Matr3	3	2	1
Cdc40	3	2	1
Pik3c2a	3	2	1
Miga2	3	2	1
Hook1	3	2	1
Etnk1	3	2	1
Utp11	3	2	1
Casp7	3	2	1
Cdh17	3	2	1
Entpd5	3	2	1
Ebf3	3	2	1
Sms	3	2	1
Ccm2	3	2	1
Akap12	3	2	1
Rab21	3	2	1
Smim15	3	2	1
Nck2	3	2	1
Nuak2	3	2	1
Ralb	3	2	1
Epm2aip1	3	2	1
Dhx15	3	2	1
Trim63	3	2	1
Insyn2	3	2	1
Nptx1	3	2	1
Qk	3	2	1
Abcg2	3	2	1
Col11a1	3	2	1
Id4	3	2	1
Elavl4	3	2	1
Usp26	3	2	1
Nptn	3	2	1
Wdr20	3	2	1
Atp10a	3	2	1
Ywhab	3	2	1
Plaa	3	2	1
Zfp329	3	2	1
Glra2	3	2	1
St8sia3	3	2	1
RGD1562136	3	2	1
Rpe65	3	2	1
Prc1	3	2	1
Fam104a	3	2	1
Tspan2	3	2	1
Ndst1	3	1	1
Cltc	3	1	1
Fam102b	3	1	1
Sycp1	3	1	1
Dcaf1	3	1	1
Mef2d	3	1	1
Smim13	3	1	1
Ctsl	3	1	1
Gata4	3	1	1
Wee1	3	1	1
Itgb1	3	1	1
Ccdc172	3	1	1
Phf20l1	3	1	1
RGD1307947	3	1	1
Lhfpl6	3	1	1
Qsox2	3	1	1
Spry4	3	1	1
Dkk2	3	1	1
Pip4p1	3	1	1
RGD1309748	3	1	1
Ubtf	3	1	1
Ogn	3	1	1
Slf2	3	1	1
Zfp322a	3	1	1
Yipf4	3	1	1
Sfrp1	3	1	1
Lrch1	3	1	1
Ube2ql1	3	1	1
Jmjd1c	3	1	1
Itm2b	3	1	1
Akap9	3	1	1
Donson	3	1	1
Eif2b5	3	1	1
Cwc25	3	1	1
Pno1	3	1	1
Emc4	3	1	1
Patj	3	1	1
Tmem150a	3	1	1
Sptssa	3	1	1
Fam98a	3	1	1
Nsd1	3	1	1
Zfp68	3	1	1
Emx2	3	1	1
Smad2	3	1	1
Phyhipl	3	1	1
Ncam2	3	1	1
Rnf139	3	1	1
Mboat2	3	1	1
Zfp612	3	1	1
Pabpc6	3	1	1
Usp1	3	1	1
Tnpo2	3	1	1
Sh3bp4	3	1	1
Dhx9	3	1	1
Slain2	3	1	1
Dip2c	3	1	1
Sema3f	3	1	1
Sgk1	3	1	1
Rtf1	3	1	1
Pea15	3	1	1
Med1	3	1	1
Lingo2	3	1	1
Cc2d1b	3	1	1
Ndc1	3	1	1
Gpbp1	3	0	1
Nav2	3	0	1
Tmx4	3	0	1
Foxp4	3	0	1
Lmx1a	3	0	1
Tmtc2	3	0	1
Dgkg	3	0	1
Cdh2	3	0	1
Cops7b	3	3	0
Gabarapl1	3	3	0
Plekhh1	3	3	0
Cbll1	3	3	0
Shisa7	3	3	0
Ttc30b	3	3	0
Gpsm1	3	3	0
Slc7a1	3	3	0
Dph6	3	3	0
Col14a1	3	3	0
Kat7	3	3	0
Ube4a	3	3	0
Rnf34	3	3	0
Serp1	3	3	0
RGD1305464	3	3	0
RGD1308706	3	3	0
Hiatl3	3	3	0
Sema5a	3	3	0
S1pr1	3	3	0
Sec24d	3	3	0
Psme4	3	3	0
Taz	3	3	0
Tgoln2	3	3	0
Sec14l2	3	3	0
Osbpl9	3	3	0
Pctp	3	3	0
Chp2	3	3	0
Plb1	3	3	0
Fut1	3	3	0
Tnfsf4	3	3	0
Lactb	3	3	0
Bmf	3	3	0
Necab3	3	3	0
Wars	3	3	0
Slc35a4	3	3	0
Triap1	3	3	0
Mip	3	3	0
Mfsd9	3	3	0
Bak1	3	3	0
Mapk13	3	3	0
Ptpn1	3	3	0
Galnt14	3	3	0
G4	3	3	0
Eif1ad	3	3	0
Galnt5	3	3	0
Tmprss13	3	3	0
Il16	3	3	0
Zfp691	3	3	0
Nrm	3	3	0
Tmem135	3	3	0
Gjb4	3	3	0
Them6	3	3	0
Dvl1	3	3	0
LOC100294508	3	3	0
Hapln1	3	3	0
Rfxank	3	3	0
Faap20	3	3	0
Opalin	3	3	0
Asic1	3	3	0
Slc1a5	3	3	0
Glrx2	3	3	0
Smurf1	3	3	0
Tor2a	3	3	0
Map3k11	3	3	0
RGD1561149	3	3	0
Ppme1	3	3	0
Lyrm7	3	3	0
Cln6	3	3	0
RGD1305347	3	3	0
Vps37b	3	3	0
Rabl6	3	3	0
Scube1	3	3	0
Phf20	3	3	0
Acads	3	3	0
Ier2	3	3	0
Itga7	3	3	0
Sumo2	3	3	0
Scaf8	3	3	0
Pls3	3	3	0
Sec63	3	3	0
Hoxd10	3	3	0
Akap11	3	3	0
Elk4	3	2	0
Slc5a3	3	2	0
Nampt	3	2	0
Birc6	3	2	0
Gpr180	3	2	0
Fstl5	3	2	0
Tmpo	3	2	0
Sv2b	3	2	0
Sorcs3	3	2	0
Zfp638	3	2	0
Rcor1	3	2	0
Phf2	3	2	0
Asah2	3	2	0
St13	3	2	0
Dync1i1	3	2	0
Inhbb	3	2	0
Cttnbp2nl	3	2	0
Tmed5	3	2	0
Ccp110	3	2	0
Bsn	3	2	0
Stag1	3	2	0
Ralbp1	3	2	0
Dnajc27	3	1	0
Gabrb3	3	1	0
Zc3h7b	3	1	0
Rab6b	3	1	0
Palm	3	1	0
Ube2e3	3	1	0
Ctdsp1	3	1	0
Ppm1k	3	1	0
Rnf14	3	1	0
Fam84a	3	1	0
Ganab	3	0	0
Syde2	2	0	2
Alg13	2	0	2
Osbpl6	2	0	2
B2m	2	0	2
Axin2	2	0	2
Hdgfl3	2	0	2
Mta2	2	0	2
Plcxd2	2	0	2
RGD1359108	2	0	2
Rarg	2	0	2
Zfp746	2	0	2
Ddah1	2	0	2
Gabrb1	2	0	2
Rgs8	2	0	2
Afap1l2	2	0	2
Scn3a	2	0	2
Yaf2	2	0	2
Sec22a	2	0	2
Plch1	2	0	2
Eml4	2	0	2
Car13	2	0	2
Tmem181	2	0	2
Sema6b	2	0	2
Ppid	2	0	2
Anapc10	2	0	2
Mcf2l	2	0	2
Cttnbp2	2	0	2
Actr1a	2	0	2
Xkr4	2	0	2
Pgm1	2	0	2
Erlin1	2	0	2
Ehmt1	2	0	2
Exoc6	2	0	2
Dnmt3a	2	0	2
Gldc	2	0	2
Stk10	2	0	2
Tpp2	2	0	2
Slc7a10	2	0	2
Grm3	2	0	2
Btnl5	2	0	2
Gnai2	2	0	2
Cth	2	0	2
Rrad	2	0	2
Mttp	2	0	2
Rab32	2	0	2
Il21r	2	0	2
Adra2a	2	0	2
Myo9b	2	0	2
Rab4b	2	0	2
Bnc1	2	0	2
Nsg1	2	0	2
Chka	2	0	2
Ccnk	2	0	2
Fst	2	0	2
Abl1	2	0	2
Asah1	2	0	2
Cables1	2	0	2
Lrrc17	2	0	2
Hells	2	0	2
Camk2d	2	0	2
Ube2j1	2	0	2
Prl7a4	2	0	2
Ube2i	2	0	2
Tasp1	2	0	2
Rab38	2	0	2
Kxd1	2	0	2
Cblb	2	0	2
Atp6v1c1	2	0	2
2020-09-08	2	0	2
Slc35c1	2	0	2
Gltp	2	0	2
Irx4	2	0	2
Nedd4	2	0	2
Ermp1	2	0	2
Zup1	2	0	2
Atp6v0d1	2	0	2
Gtf2h4	2	0	2
Haus4	2	0	2
Mtdh	2	0	2
Lipi	2	0	2
Siah2	2	0	2
Fam110b	2	0	2
Lefty1	2	0	2
Apaf1	2	0	2
Snx18	2	0	2
Ppp3cb	2	0	2
Fkbp3	2	0	2
Ppp1r12a	2	0	2
Coq3	2	0	2
Impact	2	0	2
Meig1	2	0	2
Lrfn2	2	0	2
Rps6ka2	2	0	2
RGD1564937	2	0	2
Scn8a	2	0	2
Zfp280b	2	0	2
Tmem200a	2	0	2
Gucy2c	2	0	2
Prickle1	2	0	2
Nefl	2	0	2
Lrrc8d	2	0	2
Cars	2	0	2
Nkx2-2	2	0	2
Slc35d3	2	0	2
Wdr82	2	0	2
H2afy	2	0	2
Lrrc28	2	0	2
Chst1	2	0	2
Fbxo42	2	0	2
Tmem175	2	0	2
Neurod1	2	0	2
Rbm25	2	0	2
Cyp2a2	2	0	2
Galnt2	2	0	2
Ing3	2	0	2
Cmahp	2	0	2
Lpar3	2	0	2
Dpy19l4	2	0	2
Crhbp	2	0	2
Ubn1	2	0	2
Smc5	2	0	2
Abcg5	2	0	2
Ksr1	2	0	2
Myh11	2	0	2
Sptssb	2	0	2
Slc6a9	2	0	2
Gpm6b	2	0	2
Cwf19l2	2	0	2
Mical1	2	0	2
Fam129c	2	0	2
Pole4	2	0	2
Snca	2	0	2
rnf141	2	0	2
Hcst	2	0	2
Col26a1	2	0	2
Cnppd1	2	0	2
Ska1	2	0	2
Trim16	2	0	2
Wdr47	2	0	2
Pdk3	2	0	2
Xcr1	2	0	2
Tmed9	2	0	2
Ppdpf	2	0	2
Ghitm	2	0	2
Spert	2	0	2
Clspn	2	0	2
Smim12	2	0	2
Cat	2	0	2
Ddias	2	0	2
Pgc	2	0	2
Tsc22d3	2	0	2
Srp54a	2	0	2
Med19	2	0	2
Psme3	2	0	2
Rela	2	0	2
Pgam5	2	0	2
Synj2bp	2	0	2
Pld1	2	0	2
Cldn6	2	0	2
Lrrc29	2	0	2
Tdp1	2	0	2
Rab5if	2	0	2
Ankfy1	2	0	2
Hyal4	2	0	2
Mknk1	2	0	2
Rfx2	2	0	2
Kcnj1	2	0	2
Lemd3	2	0	2
Mplkip	2	0	2
Serf2	2	0	2
Tmco4	2	0	2
Stap2	2	0	2
Sox13	2	0	2
Man1a1	2	0	2
Hivep3	2	0	2
Lrp12	2	0	2
Aard	2	0	2
Zcrb1	2	0	2
Ces1d	2	0	2
Parpbp	2	0	2
Herc3	2	0	2
Cxadr	2	0	2
Smad4	2	0	2
Hdlbp	2	0	2
Rabgap1	2	0	2
Zbtb44	2	0	2
Svop	2	0	2
Agfg2	2	0	2
Lactb2	2	0	2
Trim3	2	0	2
Isoc1	2	0	2
Zbtb9	2	0	2
Egln3	2	0	2
Osbpl5	2	0	2
Zdhhc1	2	0	2
Golph3l	2	0	2
Cyp4a3	2	0	2
Prorsd1	2	0	2
Stk11	2	0	2
RGD1306502	2	0	2
Dgkb	2	1	1
Srsf3	2	1	1
Csn2	2	1	1
Cacna2d1	2	1	1
Abhd17b	2	1	1
Morf4l2	2	1	1
Galnt13	2	1	1
Gpr171	2	1	1
Stradb	2	1	1
Tab1	2	1	1
Shoc2	2	1	1
Cdh11	2	1	1
Eif4b	2	1	1
Tsc22d1	2	1	1
Taf2	2	1	1
Mfsd14b	2	1	1
Ddx3	2	1	1
Tdo2	2	1	1
Prps2	2	1	1
Elavl1	2	1	1
Sertad4	2	1	1
Trrap	2	1	1
Ipo7	2	1	1
Pex12	2	1	1
LOC365985	2	1	1
Tab2	2	1	1
Dnaja1	2	1	1
Arpp21	2	1	1
Ndp	2	1	1
Sepsecs	2	1	1
Bbs5	2	1	1
Cacul1	2	1	1
Kctd9	2	1	1
Hccs	2	1	1
MGC114483	2	1	1
Hoxd1	2	1	1
Upp2	2	1	1
Coa5	2	1	1
Smarca4	2	1	1
Crisp1	2	1	1
Cyfip1	2	1	1
Glud1	2	1	1
Giot1	2	1	1
Runx1	2	1	1
Aph1a	2	1	1
Gcnt1	2	1	1
Mtor	2	1	1
Fam227a	2	1	1
Atp6v0c	2	1	1
Chfr	2	1	1
H1f0	2	1	1
Dynll2	2	1	1
Cyp7a1	2	1	1
Higd1a	2	1	1
Golph3	2	1	1
Fam91a1	2	1	1
Eva1a	2	1	1
Rhobtb1	2	1	1
Slc2a13	2	1	1
Map3k4	2	1	1
Abtb2	2	1	1
Cxcl10	2	1	1
Sec61a1	2	1	1
Palb2	2	1	1
Cdon	2	1	1
Rnf138	2	1	1
Phlda1	2	1	1
LOC100125367	2	1	1
B3gnt2	2	1	1
Cyp26b1	2	1	1
Ehbp1	2	1	1
Spsb4	2	1	1
Map4k4	2	1	1
Abhd18	2	1	1
Tmem38b	2	1	1
Tfpi2	2	1	1
Nacc2	2	1	1
Tox3	2	1	1
Adgrl2	2	1	1
Chst10	2	1	1
Pax9	2	1	1
Txnrd1	2	1	1
Rab1a	2	1	1
Psd2	2	1	1
Lrrc7	2	1	1
Dnali1	2	1	1
Kif11	2	1	1
Sgce	2	1	1
Olfml2b	2	1	1
Tle1	2	1	1
Rab3gap2	2	1	1
Sgtb	2	1	1
Mageb4	2	1	1
Prelid3b	2	1	1
Nasp	2	1	1
Pias1	2	1	1
St5	2	1	1
Cbx5	2	1	1
Brf2	2	1	1
Dock11	2	1	1
Syf2	2	1	1
2020-09-09	2	1	1
Rabggtb	2	1	1
Sfpq	2	1	1
Tex30	2	1	1
Rtn1	2	1	1
Irf6	2	1	1
Tcf3	2	1	1
[truncated: 2,910 more rows]
