# Supplementary material for: Aging Induces Profound Changes in sncRNA in Rat Sperm and these Changes are Modified by Perinatal Exposure to Environmental Flame Retardant
Source: Preprints.org preprint supplement (doi:10.20944/preprints202010.0339.v1), 2020-10-16
Supplement: Supplementary file 5 [file Supplemental Table 4.xlsx]

## Sheet: Sheet1
Supplemental Table 4. Functional enrichment of significant age-dependent piRNA in exposed animals.
Targets	Identified non-age-dependent piRNA	Identified age-dependent piRNA	Enrichment, fold change	p-value
All	28096	44	--	--
LINE	1212	2	1.05	0.72
SINE	1283	4	2	0.14
LTR	716	4	3.54	0.026
Satellite	35	0	--	1
Protein coding	4507	4	-1.76	0.3
